# Supplementary material for: Structural and mechanistic basis of the EMC-dependent biogenesis of distinct transmembrane clients
Source: eLife. 2020 Nov 25;9:e62611. doi: 10.7554/eLife.62611 (PMC7785296; doi:10.7554/eLife.62611)
Supplement: Supplementary file 1. — SEC purified hEMC in detergent (sheet 1) or nanodiscs (sheet 2) were subjected to tryptic digestion and mass spectrometry. The tables list identified proteins sorted by iBAQ score (descending order). EMC subunits are highlighted in yellow. [file elife-62611-supp1.xlsx]

## Sheet: iBAQ_hEMC_detergent
Protein IDs	Majority protein IDs	Peptide counts (all)	Peptide counts (razor+unique)	Peptide counts (unique)	Protein names	Gene names	Fasta headers	Number of proteins	Peptides	Razor + unique peptides	Unique peptides	Sequence coverage [%]	Unique + razor sequence coverage [%]	Unique sequence coverage [%]	Mol. weight [kDa]	Sequence length	Sequence lengths	Q-value	Score	Intensity	iBAQ	MS/MS count	Only identified by site	Reverse	Potential contaminant	id	Peptide IDs	Peptide is razor	Mod. peptide IDs	Evidence IDs	MS/MS IDs	Best MS/MS	Oxidation (M) site IDs	Oxidation (M) site positions
REV__A0A087X210;REV__P56373	REV__A0A087X210;REV__P56373	1;1	1;1	1;1			tr|A0A087X210|A0A087X210_HUMAN P2X purinoceptor OS=Homo sapiens OX=9606 GN=P2RX3 PE=3 SV=1;sp|P56373|P2RX3_HUMAN P2X purinoceptor 3 OS=Homo sapiens OX=9606 GN=P2RX3 PE=1 SV=2	2	1	1	1	0	0	0	44176	396	396;397	0.0036563	59772	33191000	NaN	1		+		1148	3167	True	3368	5248	5710	5710
REV__A0A140TA11;REV__Q29718;REV__P30685;REV__P30498;REV__P30495;REV__P30493;REV__P30492;REV__P30491;REV__P30490;REV__P30485;REV__P30484;REV__Q29940;REV__A0A140TA13;REV__P30461;REV__P18465;REV__P18464;REV__P10319;REV__P30464;REV__A0A140T9Y5;REV__A0A140T997;REV__A0A140T953;REV__A0A140TA14;REV__P30481	REV__A0A140TA11;REV__Q29718;REV__P30685;REV__P30498;REV__P30495;REV__P30493;REV__P30492;REV__P30491;REV__P30490;REV__P30485;REV__P30484;REV__Q29940;REV__A0A140TA13;REV__P30461;REV__P18465;REV__P18464;REV__P10319;REV__P30464;REV__A0A140T9Y5;REV__A0A140T997;REV__A0A140T953;REV__A0A140TA14;REV__P30481	1;1;1;1;1;1;1;1;1;1;1;1;1;1;1;1;1;1;1;1;1;1;1	1;1;1;1;1;1;1;1;1;1;1;1;1;1;1;1;1;1;1;1;1;1;1	1;1;1;1;1;1;1;1;1;1;1;1;1;1;1;1;1;1;1;1;1;1;1			tr|A0A140TA11|A0A140TA11_HUMAN HLA class I histocompatibility antigen, B-46 alpha chain OS=Homo sapiens OX=9606 GN=HLA-B PE=1 SV=1;sp|Q29718|1B82_HUMAN HLA class I histocompatibility antigen, B-82 alpha chain OS=Homo sapiens OX=9606 GN=HLA-B PE=1 SV=1;sp|P	23	1	1	1	0	0	0	25866	224	224;362;362;362;362;362;362;362;362;362;362;362;224;362;362;362;362;362;246;246;246;224;362	1	-2	79547000	NaN	1	+	+		1149	4628	True	4968	7579	8230	8230	584	189
REV__E5RI09;REV__E5RG95;REV__K7EPM1;REV__K7EKN2;REV__E5RGZ4;REV__P13929-2;REV__P13929	REV__E5RI09;REV__E5RG95;REV__K7EPM1;REV__K7EKN2;REV__E5RGZ4;REV__P13929-2;REV__P13929	1;1;1;1;1;1;1	1;1;1;1;1;1;1	1;1;1;1;1;1;1			tr|E5RI09|E5RI09_HUMAN Beta-enolase (Fragment) OS=Homo sapiens OX=9606 GN=ENO3 PE=1 SV=1;tr|E5RG95|E5RG95_HUMAN Beta-enolase (Fragment) OS=Homo sapiens OX=9606 GN=ENO3 PE=1 SV=1;tr|K7EPM1|K7EPM1_HUMAN Beta-enolase (Fragment) OS=Homo sapiens OX=9606 GN=ENO3	7	1	1	1	0	0	0	15798	148	148;154;196;212;283;406;434	0.0072333	5832	54221000	NaN	1		+		1150	3759	True	3981	6114	6640	6640
REV__F8WD38	REV__F8WD38	1	1	1			tr|F8WD38|F8WD38_HUMAN Peptidylprolyl isomerase OS=Homo sapiens OX=9606 GN=FKBP6 PE=1 SV=1	1	1	1	1	0	0	0	11003	101	101	0.0028143	61591	3876800000	NaN	1		+		1151	6078	True	6494	9820	10631	10631
REV__G3V5W3	REV__G3V5W3	1	1	1			tr|G3V5W3|G3V5W3_HUMAN Son of sevenless homolog 2 OS=Homo sapiens OX=9606 GN=SOS2 PE=1 SV=1	1	1	1	1	0	0	0	81216	70	70	0.0089928	57999	20138000	NaN	1		+		1152	5219	True	5585	8426	9115	9115
REV__Q5T5S1-3;REV__G5E9W6;REV__Q5T5S1-4;REV__Q5T5S1-2;REV__Q5T5S1	REV__Q5T5S1-3;REV__G5E9W6;REV__Q5T5S1-4;REV__Q5T5S1-2;REV__Q5T5S1	1;1;1;1;1	1;1;1;1;1	1;1;1;1;1			sp|Q5T5S1-3|CC183_HUMAN Isoform 3 of Coiled-coil domain-containing protein 183 OS=Homo sapiens OX=9606 GN=CCDC183;tr|G5E9W6|G5E9W6_HUMAN Coiled-coil domain-containing protein 183 OS=Homo sapiens OX=9606 GN=CCDC183 PE=1 SV=1;sp|Q5T5S1-4|CC183_HUMAN Isoform	5	1	1	1	0	0	0	23.21	194	194;318;383;464;534	0.0081008	5803	28251000	NaN	1		+		1153	5544	True	5929	8988	9724	9724
REV__H3BRL7	REV__H3BRL7	1	1	1			tr|H3BRL7|H3BRL7_HUMAN Cadherin-13 OS=Homo sapiens OX=9606 GN=CDH13 PE=4 SV=1	1	1	1	1	0	0	0	75668	67	67	0.0054446	58855	3510600000	NaN	1		+		1154	2734	True	2909	4588	5014	5014
REV__J3QLR8	REV__J3QLR8	1	1	1			tr|J3QLR8|J3QLR8_HUMAN 28S ribosomal protein S23, mitochondrial OS=Homo sapiens OX=9606 GN=MRPS23 PE=1 SV=1	1	1	1	1	0	0	0	17517	152	152	0.0019157	63195	351850000	NaN	1		+		1155	3578	True	3791	5879	6403	6403
REV__K7EJ04;REV__Q99856	REV__K7EJ04;REV__Q99856	1;1	1;1	1;1			tr|K7EJ04|K7EJ04_HUMAN AT-rich interactive domain-containing protein 3A (Fragment) OS=Homo sapiens OX=9606 GN=ARID3A PE=1 SV=8;sp|Q99856|ARI3A_HUMAN AT-rich interactive domain-containing protein 3A OS=Homo sapiens OX=9606 GN=ARID3A PE=1 SV=2	2	1	1	1	0	0	0	35397	338	338;593	1	-2	30122000	NaN	1	+	+		1156	2085	True	2226	3289	3514	3514	585	218
REV__O15204-2	REV__O15204-2	1	1	1			sp|O15204-2|ADEC1_HUMAN Isoform 2 of ADAM DEC1 OS=Homo sapiens OX=9606 GN=ADAMDEC1	1	1	1	1	0	0	0	43556	391	391	1	-2	131120000	NaN	1	+	+		1157	5756	True	6152	9347	10128	10128	586	391
REV__Q5T5Y3-2;REV__Q5T5Y3;REV__Q5T5Y3-3	REV__Q5T5Y3-2;REV__Q5T5Y3;REV__Q5T5Y3-3	1;1;1	1;1;1	1;1;1			sp|Q5T5Y3-2|CAMP1_HUMAN Isoform 2 of Calmodulin-regulated spectrin-associated protein 1 OS=Homo sapiens OX=9606 GN=CAMSAP1;sp|Q5T5Y3|CAMP1_HUMAN Calmodulin-regulated spectrin-associated protein 1 OS=Homo sapiens OX=9606 GN=CAMSAP1 PE=1 SV=2;sp|Q5T5Y3-3|CAM	3	1	1	1	0	0	0	146.54	1324	1324;1602;1613	0.0098302	57524	1003600000	NaN	1		+		1158	6365	True	6796	10311	11159	11159
REV__Q6UWU2-2;REV__Q6UWU2	REV__Q6UWU2-2;REV__Q6UWU2	1;1	1;1	1;1			sp|Q6UWU2-2|GLB1L_HUMAN Isoform 2 of Beta-galactosidase-1-like protein OS=Homo sapiens OX=9606 GN=GLB1L;sp|Q6UWU2|GLB1L_HUMAN Beta-galactosidase-1-like protein OS=Homo sapiens OX=9606 GN=GLB1L PE=2 SV=1	2	1	1	1	0	0	0	64024	564	564;654	1	-2	1286200000	NaN	1	+	+		1159	3581	True	3794	5882	6406	6406	587	363
REV__Q7Z2Y8	REV__Q7Z2Y8	1	1	1			sp|Q7Z2Y8|GVIN1_HUMAN Interferon-induced very large GTPase 1 OS=Homo sapiens OX=9606 GN=GVINP1 PE=2 SV=2	1	1	1	1	0	0	0	279.04	2422	2422	0.0045413	58984	111400000	NaN	2		+		1160	1427	True	1522;1523	2372;2373	2568;2569	2568	588	2399
REV__Q92994-9;REV__Q92994-3;REV__Q92994-7;REV__Q92994-5;REV__Q92994	REV__Q92994-9;REV__Q92994-3;REV__Q92994-7;REV__Q92994-5;REV__Q92994	1;1;1;1;1	1;1;1;1;1	1;1;1;1;1			sp|Q92994-9|TF3B_HUMAN Isoform 9 of Transcription factor IIIB 90 kDa subunit OS=Homo sapiens OX=9606 GN=BRF1;sp|Q92994-3|TF3B_HUMAN Isoform 3 of Transcription factor IIIB 90 kDa subunit OS=Homo sapiens OX=9606 GN=BRF1;sp|Q92994-7|TF3B_HUMAN Isoform 7 of Tr	5	1	1	1	0	0	0	47978	439	439;473;562;650;677	0.0063521	58768	191410000	NaN	1		+		1161	5887	True	6293	9566	10372	10372
REV__Q9UJA3-2;REV__Q9UJA3-3;REV__Q9UJA3;REV__Q9UJA3-4;REV__E5RG31;REV__Q9NXL9-2;REV__A0A3B3IS57;REV__Q9NXL9-4;REV__A0A3B3IU45;REV__P33991;REV__A0A3B3IT92;REV__Q9NXL9	REV__Q9UJA3-2;REV__Q9UJA3-3;REV__Q9UJA3;REV__Q9UJA3-4;REV__E5RG31;REV__Q9NXL9-2;REV__A0A3B3IS57;REV__Q9NXL9-4;REV__A0A3B3IU45;REV__P33991;REV__A0A3B3IT92;REV__Q9NXL9	2;2;2;2;1;1;1;1;1;1;1;1	2;2;2;2;1;1;1;1;1;1;1;1	2;2;2;2;1;1;1;1;1;1;1;1			sp|Q9UJA3-2|MCM8_HUMAN Isoform 2 of DNA helicase MCM8 OS=Homo sapiens OX=9606 GN=MCM8;sp|Q9UJA3-3|MCM8_HUMAN Isoform 3 of DNA helicase MCM8 OS=Homo sapiens OX=9606 GN=MCM8;sp|Q9UJA3|MCM8_HUMAN DNA helicase MCM8 OS=Homo sapiens OX=9606 GN=MCM8 PE=1 SV=2;sp|	12	2	2	2	0	0	0	88755	793	793;824;840;880;582;648;749;762;813;863;904;1143	0.0011338	1994-10-01	104220000	NaN	1		+		1162	3475;3777	True;True	3687;4000	5690;6137	6193;6663	6193;6663
Q8N4V1;Q8N4V1-2	Q8N4V1;Q8N4V1-2	12;9	12;9	12;9	Membrane magnesium transporter 1	MMGT1	sp|Q8N4V1|MMGT1_HUMAN Membrane magnesium transporter 1 OS=Homo sapiens OX=9606 GN=MMGT1 PE=1 SV=1;sp|Q8N4V1-2|MMGT1_HUMAN Isoform 2 of Membrane magnesium transporter 1 OS=Homo sapiens OX=9606 GN=MMGT1	2	12	12	12	90.1	90.1	90.1	14686	131	131;196	0	323.31	285000000000	40671000000	102				878	429;957;958;1204;2224;3100;4010;4011;4306;4624;5557;6140	True;True;True;True;True;True;True;True;True;True;True;True	466;1021;1022;1023;1024;1289;2374;3296;4245;4246;4247;4248;4249;4625;4963;5944;6559	712;1569;1570;1571;1572;1573;1574;1575;1576;1577;1578;1579;1580;1581;1582;1583;1584;1585;1900;1901;3556;3557;3558;3559;3560;3561;3562;3563;3564;3565;3566;3567;3568;3569;3570;3571;3572;3573;3574;3575;3576;3577;5152;5153;6474;6475;6476;6477;6478;6479;6480;6481;6482;7105;7106;7107;7108;7109;7110;7111;7112;7113;7114;7115;7116;7570;7571;7572;7573;7574;9057;9058;9059;9060;9061;9062;9063;9064;9065;9066;…	742;1666;1667;1668;1669;1670;1671;1672;1673;1674;1675;1676;1677;1678;1679;1680;1681;1682;1683;1684;1685;1686;2014;2015;3836;3837;3838;3839;3840;3841;3842;3843;3844;3845;3846;3847;3848;3849;3850;3851;3852;3853;3854;3855;3856;3857;3858;3859;3860;3861;3862;3863;3864;3865;3866;3867;3868;3869;3870;5611;5612;5613;7027;7028;7029;7030;7031;7032;7033;7034;7035;7725;7726;7727;7728;7729;7730;7731;7732;7733;…	742;1681;1685;2014;3837;5611;7029;7033;7733;8221;9822;10709	441;442	1;70
Q15006;H0YAS9;E5RGJ2	Q15006	25;9;7	25;9;7	25;9;7	ER membrane protein complex subunit 2	EMC2	sp|Q15006|EMC2_HUMAN ER membrane protein complex subunit 2 OS=Homo sapiens OX=9606 GN=EMC2 PE=1 SV=1	3	25	25	25	80.5	80.5	80.5	34833	297	297;135;112	0	323.31	533000000000	29635000000	288				766	30;317;561;623;787;788;1428;1732;1733;2827;2828;3145;3366;3367;4437;4463;4749;6311;6312;6313;6560;6569;6611;6793;6794	True;True;True;True;True;True;True;True;True;True;True;True;True;True;True;True;True;True;True;True;True;True;True;True;True	31;32;33;343;344;604;605;672;844;845;1524;1852;1853;1854;3007;3008;3346;3574;3575;3576;4768;4795;5091;6740;6741;6742;6743;6744;7005;7014;7062;7258;7259	32;33;34;35;36;37;38;39;40;41;42;43;44;45;46;47;48;49;50;51;52;53;54;55;56;57;58;59;60;61;62;63;64;65;66;67;68;69;70;71;72;73;74;75;76;77;78;79;80;81;82;83;84;85;483;484;485;486;487;488;489;490;491;492;493;494;495;496;497;498;499;500;501;502;503;504;505;506;507;508;509;510;511;512;513;514;515;516;517;906;907;908;909;910;911;912;913;914;915;916;917;918;919;920;921;922;923;924;925;926;927;928;929;9…	32;33;34;35;36;37;38;39;40;41;42;43;44;45;46;47;48;49;50;51;52;53;54;55;56;57;58;59;60;61;62;63;64;65;66;67;68;69;70;71;72;73;74;75;76;77;78;79;80;81;82;83;84;85;86;87;88;89;501;502;503;504;505;506;507;508;509;510;511;512;513;514;515;516;517;518;519;520;521;522;523;524;525;526;527;528;529;530;531;532;533;534;535;536;537;944;945;946;947;948;949;950;951;952;953;954;955;956;957;958;959;960;961;962;9…	53;501;994;1075;1323;1329;2570;3009;3013;5179;5184;5684;6041;6044;7927;7996;8380;11029;11063;11070;11482;11496;11566;11816;11822	398;399;400;401;402;403;404	15;60;100;182;183;234;288
Q8N766-2;Q8N766;Q8N766-4;A0A286YEW0;Q5TG59;H7C4E3;H7C5A2	Q8N766-2;Q8N766;Q8N766-4	85;85;82;20;8;5;4	85;85;82;20;8;5;4	2;2;2;2;0;0;0	ER membrane protein complex subunit 1	EMC1	sp|Q8N766-2|EMC1_HUMAN Isoform 2 of ER membrane protein complex subunit 1 OS=Homo sapiens OX=9606 GN=EMC1;sp|Q8N766|EMC1_HUMAN ER membrane protein complex subunit 1 OS=Homo sapiens OX=9606 GN=EMC1 PE=1 SV=1;sp|Q8N766-4|EMC1_HUMAN Isoform 4 of ER membrane p	7	85	85	2	87.3	87.3	2020-05-02	111.63	992	992;993;971;190;75;86;178	0	323.31	1760000000000	27067000000	1468				884	29;114;288;375;376;446;792;794;799;800;906;907;947;1261;1267;1268;1562;1563;1694;1695;1824;1896;1990;2179;2180;2274;2322;2494;2495;2575;2756;3036;3042;3046;3107;3131;3334;3524;3842;3843;3962;3963;3986;3987;4085;4141;4260;4261;4281;4471;4514;4516;4560;4613;4744;4745;4783;4817;4818;4943;4987;4989;4990;4991;5236;5243;5323;5348;5372;5447;5563;5585;5784;5799;5812;6157;6158;6172;6337;6345;6407;6408;653…	True;True;True;True;True;True;True;True;True;True;True;True;True;True;True;True;True;True;True;True;True;True;True;True;True;True;True;True;True;True;True;True;True;True;True;True;True;True;True;True;True;True;True;True;True;True;True;True;True;True;True;True;True;True;True;True;True;True;True;True;True;True;True;True;True;True;True;True;True;True;True;True;True;True;True;True;True;True;True;True…	30;123;124;313;406;407;483;849;851;856;857;967;968;969;1011;1350;1356;1357;1358;1359;1671;1672;1673;1812;1813;1950;2029;2128;2325;2326;2427;2478;2479;2660;2661;2745;2746;2931;3228;3229;3236;3240;3303;3329;3540;3737;4067;4068;4193;4194;4218;4219;4348;4428;4429;4430;4431;4576;4577;4597;4803;4849;4851;4896;4952;5084;5085;5086;5087;5126;5161;5162;5290;5338;5340;5341;5342;5343;5602;5609;5694;5721;5745…	31;190;191;192;193;194;195;196;197;198;199;200;201;202;203;204;205;446;447;597;598;599;600;601;602;603;604;605;606;607;608;609;610;611;612;613;614;615;616;617;618;619;620;621;622;623;624;625;626;627;628;629;630;631;632;633;634;635;636;730;731;732;733;734;735;736;737;738;739;740;741;742;743;744;745;746;747;748;749;750;751;752;753;754;1269;1270;1271;1272;1274;1275;1276;1281;1282;1283;1284;1285;1286…	31;195;196;197;198;199;200;201;202;203;204;205;206;207;208;209;210;211;212;213;214;215;464;465;617;618;619;620;621;622;623;624;625;626;627;628;629;630;631;632;633;634;635;636;637;638;639;640;641;642;643;644;645;646;647;648;649;650;651;652;653;654;655;656;657;658;659;660;661;662;663;664;665;760;761;762;763;764;765;766;767;768;769;770;771;772;773;774;775;776;777;778;779;780;781;782;783;784;785;786;…	31;203;465;624;665;768;1336;1340;1351;1352;1516;1517;1622;2095;2106;2163;2775;2792;2956;2963;3127;3230;3392;3733;3779;3953;4164;4503;4572;4687;5059;5470;5507;5538;5622;5662;5974;6252;6746;6768;6930;6934;6972;7000;7158;7333;7580;7591;7646;8007;8079;8090;8141;8208;8369;8372;8427;8503;8529;8709;8785;8787;8790;8794;9138;9240;9354;9387;9431;9533;9836;9902;10185;10216;10270;10769;10776;10801;11105;1113…	444;445;446;447;448;449;450;451;452;453;454;455;456	90;177;336;352;456;482;504;534;535;537;597;631;976
Q9P0I2;Q9P0I2-2;S4R3U9	Q9P0I2;Q9P0I2-2	22;16;6	22;16;6	11;5;2	ER membrane protein complex subunit 3	EMC3	sp|Q9P0I2|EMC3_HUMAN ER membrane protein complex subunit 3 OS=Homo sapiens OX=9606 GN=EMC3 PE=1 SV=3;sp|Q9P0I2-2|EMC3_HUMAN Isoform 2 of ER membrane protein complex subunit 3 OS=Homo sapiens OX=9606 GN=EMC3	3	22	22	11	86.6	86.6	49.4	29952	261	261;219;78	0	323.31	350000000000	24986000000	259				1092	177;227;924;925;1439;1828;2251;2606;2607;3063;3106;3138;3148;3149;3886;4139;4880;5178;5555;6254;6416;6809	True;True;True;True;True;True;True;True;True;True;True;True;True;True;True;True;True;True;True;True;True;True	193;194;245;246;986;987;988;989;1536;1955;2403;2404;2778;2779;3258;3302;3336;3337;3338;3349;3350;4114;4420;4421;4422;4423;4424;4425;5225;5544;5941;5942;6680;6852;6853;6854;6855;7276	287;288;289;349;350;1463;1464;1465;1466;1467;1468;1469;1470;1471;1472;1473;1474;1475;1476;1477;1478;1479;1480;1481;1482;1483;1484;1485;1486;1487;1488;1489;2393;2394;2395;2396;2919;2920;3615;3616;3617;3618;3619;3620;4342;4343;4344;4345;4346;5105;5159;5160;5161;5210;5211;5212;5213;5214;5215;5226;5227;5228;5229;6283;6284;6285;6286;6287;6288;6289;6290;6291;6292;6293;6703;6704;6705;6706;6707;6708;6709…	301;302;303;363;364;1539;1540;1541;1542;1543;1544;1545;1546;1547;1548;1549;1550;1551;1552;1553;1554;1555;1556;1557;1558;1559;1560;1561;1562;1563;1564;1565;1566;1567;2589;2590;2591;2592;3132;3133;3134;3913;3914;3915;3916;3917;3918;4729;4730;4731;4732;4733;5562;5619;5620;5621;5671;5672;5673;5674;5675;5676;5687;5688;5689;5690;6818;6819;6820;6821;6822;6823;6824;6825;6826;6827;6828;6829;7278;7279;7280…	303;363;1560;1566;2591;3134;3918;4729;4732;5562;5620;5676;5688;5690;6818;7326;8618;9060;9764;10939;11274;11852	63;64;65;66;67;546;547;548;549;550;551;552	101;106;110;111;130;198;199;203;208;210;242;251
O43402;M0R1B0;O43402-2	O43402;M0R1B0	19;11;8	19;11;8	19;11;8	ER membrane protein complex subunit 8	EMC8	sp|O43402|EMC8_HUMAN ER membrane protein complex subunit 8 OS=Homo sapiens OX=9606 GN=EMC8 PE=1 SV=1;tr|M0R1B0|M0R1B0_HUMAN ER membrane protein complex subunit 8 (Fragment) OS=Homo sapiens OX=9606 GN=EMC8 PE=1 SV=1	3	19	19	19	73.3	73.3	73.3	23773	210	210;100;126	0	323.31	302000000000	23247000000	204				451	573;701;762;873;998;1957;2615;2616;2939;3897;4207;4208;4253;4545;5455;5456;5457;6105;6744	True;True;True;True;True;True;True;True;True;True;True;True;True;True;True;True;True;True;True	618;754;819;933;1068;2092;2093;2788;2789;2790;3127;4125;4513;4514;4569;4880;5834;5835;5836;6523;7207	962;1132;1133;1134;1225;1374;1375;1376;1377;1378;1379;1380;1381;1382;1383;1384;1385;1386;1387;1388;1389;1390;1391;1392;1393;1394;1395;1396;1638;1639;3098;3099;3100;3101;3102;3103;3104;3105;3106;3107;3108;3109;3110;3111;3112;3113;3114;3115;3116;3117;3118;3119;3120;3121;3122;3123;4379;4380;4381;4382;4383;4384;4385;4386;4387;4388;4389;4390;4391;4392;4393;4394;4395;4396;4397;4398;4399;4400;4401;4402;…	1014;1188;1189;1190;1191;1287;1443;1444;1445;1446;1447;1448;1449;1450;1451;1452;1453;1454;1455;1456;1457;1458;1459;1460;1461;1462;1463;1464;1465;1466;1467;1468;1469;1470;1471;1472;1741;1742;3315;3316;3317;3318;3319;3320;3321;3322;3323;3324;3325;3326;3327;3328;3329;3330;3331;3332;3333;3334;3335;3336;3337;3338;3339;3340;3341;3342;3343;3344;4774;4775;4776;4777;4778;4779;4780;4781;4782;4783;4784;4785…	1014;1189;1287;1453;1742;3338;4774;4866;5325;6843;7483;7485;7569;8120;9552;9574;9583;10668;11742	162;163;164	14;126;134
Q9Y3B6;H0YNH6;H0YKG4;H0YNQ8;Q12965	Q9Y3B6;H0YNH6	14;10;4;1;1	14;10;4;1;1	14;10;4;1;1	ER membrane protein complex subunit 9	EMC9	sp|Q9Y3B6|EMC9_HUMAN ER membrane protein complex subunit 9 OS=Homo sapiens OX=9606 GN=EMC9 PE=1 SV=3;tr|H0YNH6|H0YNH6_HUMAN ER membrane protein complex subunit 9 OS=Homo sapiens OX=9606 GN=EMC9 PE=1 SV=1	5	14	14	14	63	63	63	23061	208	208;134;94;317;1108	0	188.29	239000000000	19922000000	133				1132	248;249;910;1120;2086;2614;3692;4021;4086;4381;4723;4851;6270;6743	True;True;True;True;True;True;True;True;True;True;True;True;True;True	269;270;972;1197;2227;2228;2786;2787;3913;4262;4263;4349;4703;4704;5063;5195;5196;6697;7206	380;381;382;383;384;385;386;387;388;389;390;1445;1796;3290;3291;3292;3293;3294;3295;3296;3297;3298;3299;3300;3301;3302;3303;3304;3305;3306;3307;3308;3309;3310;3311;3312;3313;3314;3315;3316;3317;3318;3319;3320;3321;3322;4354;4355;4356;4357;4358;4359;4360;4361;4362;4363;4364;4365;4366;4367;4368;4369;4370;4371;4372;4373;4374;4375;4376;4377;4378;6028;6498;6499;6500;6501;6502;6608;6609;6610;6611;6612;…	394;395;396;397;398;399;400;401;402;403;404;405;406;407;408;1521;1906;3515;3516;3517;3518;3519;3520;3521;3522;3523;3524;3525;3526;3527;3528;3529;3530;3531;3532;3533;3534;3535;3536;3537;3538;3539;3540;3541;3542;3543;3544;3545;3546;3547;3548;3549;3550;3551;3552;3553;3554;3555;3556;3557;3558;3559;3560;3561;3562;3563;3564;3565;3566;4741;4742;4743;4744;4745;4746;4747;4748;4749;4750;4751;4752;4753;4754…	399;406;1521;1906;3520;4751;6553;7054;7166;7841;8335;8582;10961;11740	576;577;578;579	14;115;149;159
Q9BV81	Q9BV81	4	4	3	ER membrane protein complex subunit 6	EMC6	sp|Q9BV81|EMC6_HUMAN ER membrane protein complex subunit 6 OS=Homo sapiens OX=9606 GN=EMC6 PE=1 SV=1	1	4	4	3	2020-04-26	2020-04-26	2020-09-20	12017	110	110	0	33981	57820000000	14455000000	14				1015	81;1320;2238;4964	True;True;True;True	1412;2390;5312	2234;2235;3595;3596;3597;3598;3599;8066;8067	2427;2428;2429;3889;3890;3891;3892;3893;3894;3895;3896;3897;8746;8747	2427;3896;8746
Q5J8M3;H0YNK8;Q5J8M3-2;H0YK61;H0YLP8;S4R329;H0YNK0;Q5J8M3-3;H0YMH5;H0YN63	Q5J8M3;H0YNK8;Q5J8M3-2;H0YK61;H0YLP8;S4R329;H0YNK0;Q5J8M3-3	16;11;11;10;9;8;8;8;3;1	16;11;11;10;9;8;8;8;3;1	16;11;11;10;9;8;8;8;3;1	ER membrane protein complex subunit 4	EMC4	sp|Q5J8M3|EMC4_HUMAN ER membrane protein complex subunit 4 OS=Homo sapiens OX=9606 GN=EMC4 PE=1 SV=2;tr|H0YNK8|H0YNK8_HUMAN ER membrane protein complex subunit 4 OS=Homo sapiens OX=9606 GN=EMC4 PE=1 SV=1;sp|Q5J8M3-2|EMC4_HUMAN Isoform 2 of ER membrane prot	10	16	16	16	80.3	80.3	80.3	20086	183	183;102;149;78;125;72;84;136;72;43	0	230.95	142000000000	11860000000	89				799	698;725;1829;1871;2301;2302;4050;4117;4562;4921;4922;4923;4953;5069;5490;6478	True;True;True;True;True;True;True;True;True;True;True;True;True;True;True;True	750;751;781;1956;1998;1999;2457;2458;4302;4303;4391;4392;4899;4900;5268;5269;5270;5300;5426;5872;6919	1120;1121;1122;1123;1124;1125;1126;1127;1128;1129;1165;1166;1167;1168;1169;1170;1171;1172;1173;1174;1175;2921;2970;2971;2972;2973;3764;3765;3766;3767;6543;6544;6545;6546;6547;6548;6549;6550;6662;6663;6664;6665;6666;6667;6668;6669;6670;6671;7494;7495;7995;7996;7997;7998;7999;8000;8001;8002;8050;8051;8211;8906;8907;10495;10496;10497;10498;10499	1175;1176;1177;1178;1179;1180;1181;1182;1183;1184;1185;1222;1223;1224;1225;1226;1227;1228;1229;1230;1231;1232;1233;1234;3135;3184;3185;3186;3187;4087;4088;4089;4090;4091;7097;7098;7099;7100;7101;7102;7103;7104;7219;7220;7221;7222;7223;7224;7225;7226;7227;7228;7229;7230;7231;7232;7233;7234;7235;7236;7237;7238;7239;7240;7241;7242;7243;7244;7245;8144;8145;8673;8674;8675;8676;8677;8678;8679;8680;8681…	1183;1222;3135;3187;4087;4091;7098;7224;8145;8678;8679;8681;8730;8893;9634;11355	417;418;419;420;421	114;122;142;154;174
M0R2A0;Q5UCC4;Q5UCC4-2	M0R2A0;Q5UCC4;Q5UCC4-2	11;11;10	11;11;10	11;11;10	ER membrane protein complex subunit 10	EMC10	tr|M0R2A0|M0R2A0_HUMAN ER membrane protein complex subunit 10 OS=Homo sapiens OX=9606 GN=EMC10 PE=1 SV=1;sp|Q5UCC4|EMC10_HUMAN ER membrane protein complex subunit 10 OS=Homo sapiens OX=9606 GN=EMC10 PE=1 SV=1;sp|Q5UCC4-2|EMC10_HUMAN Isoform 2 of ER membran	3	11	11	11	40.7	40.7	40.7	38975	371	371;262;254	0	323.31	195000000000	11462000000	293				411	1087;1296;1297;2015;2144;2306;3304;3789;4834;4835;6808	True;True;True;True;True;True;True;True;True;True;True	1161;1388;1389;2153;2289;2462;3509;3510;4012;5178;5179;7273;7274;7275	1751;1752;1753;1754;2085;2086;2087;2088;2089;2090;2091;2092;2093;2094;2095;2096;2097;2098;2099;2100;2101;2102;2103;2104;2105;2106;2107;2108;2109;2110;2111;2112;2113;2114;2115;2116;2117;2118;2119;2120;2121;2122;2123;2124;2125;2126;2127;2128;2129;2130;2131;2132;2133;2134;2135;2136;2137;2138;2139;2140;2141;2142;2143;2144;2145;2146;2147;2148;2149;2150;2151;2152;2153;2154;2155;2156;2157;2158;2159;2160…	1860;1861;1862;1863;2223;2224;2225;2226;2227;2228;2229;2230;2231;2232;2233;2234;2235;2236;2237;2238;2239;2240;2241;2242;2243;2244;2245;2246;2247;2248;2249;2250;2251;2252;2253;2254;2255;2256;2257;2258;2259;2260;2261;2262;2263;2264;2265;2266;2267;2268;2269;2270;2271;2272;2273;2274;2275;2276;2277;2278;2279;2280;2281;2282;2283;2284;2285;2286;2287;2288;2289;2290;2291;2292;2293;2294;2295;2296;2297;2298…	1863;2230;2389;3422;3639;4102;5914;6678;8548;8562;11845	137;138;139;140	207;228;238;239
CON__P00761;A6XGL3;E9PRA0;J3KQC6;Q9BYE2-3;Q9BYE2-5;Q9BYE2-2;Q9BYE2	CON__P00761	11;1;1;1;1;1;1;1	11;1;1;1;1;1;1;1	10;0;0;0;0;0;0;0				8	11	11	10	62.3	62.3	58.9	24409	231	231;237;567;586;532;551;563;586	0	222.37	125000000000	10376000000	27			+	188	434;2774;3375;3376;3841;4330;5033;5355;5377;5917;5928	True;True;True;True;True;True;True;True;True;True;True	471;2949;2950;3584;3585;3586;4066;4649;5385;5728;5751;6323;6336	717;4652;4653;4654;4655;4656;4657;4658;5556;5557;5558;5559;5560;5561;6214;6215;6216;6217;7146;8164;8684;8722;9602;9603;9604;9605;9619	747;5090;5091;5092;5093;5094;5095;5096;5097;6055;6056;6057;6058;6059;6060;6741;6742;6743;6744;6745;7769;8845;9395;9440;10408;10409;10410;10411;10412;10426	747;5095;6057;6060;6741;7769;8845;9395;9440;10408;10426	71	94
Q9NPA0;H0YDT8;H0YDX2	Q9NPA0;H0YDT8;H0YDX2	14;12;11	14;12;11	14;12;11	ER membrane protein complex subunit 7	EMC7	sp|Q9NPA0|EMC7_HUMAN ER membrane protein complex subunit 7 OS=Homo sapiens OX=9606 GN=EMC7 PE=1 SV=1;tr|H0YDT8|H0YDT8_HUMAN ER membrane protein complex subunit 7 (Fragment) OS=Homo sapiens OX=9606 GN=EMC7 PE=1 SV=1;tr|H0YDX2|H0YDX2_HUMAN ER membrane protei	3	14	14	14	63.2	63.2	63.2	26.47	242	242;192;160	0	274.37	159000000000	9930600000	117				1053	601;1464;1577;1728;3735;4611;4965;5352;5523;5763;5764;6197;6412;6413	True;True;True;True;True;True;True;True;True;True;True;True;True;True	649;1562;1563;1564;1565;1566;1687;1848;3957;4950;5313;5314;5725;5906;6159;6160;6618;6846;6847;6848;6849	995;996;2429;2430;2431;2432;2433;2434;2435;2436;2437;2438;2439;2440;2441;2442;2443;2444;2445;2446;2447;2448;2449;2450;2451;2452;2453;2596;2791;6085;6086;6087;7555;8068;8069;8070;8071;8072;8073;8681;8955;8956;8957;8958;8959;8960;8961;8962;8963;8964;9355;9356;9357;9358;9359;9360;9361;9362;10005;10006;10007;10008;10009;10010;10011;10012;10013;10014;10015;10016;10017;10018;10019;10020;10021;10022;100…	1047;1048;2627;2628;2629;2630;2631;2632;2633;2634;2635;2636;2637;2638;2639;2640;2641;2642;2643;2644;2645;2646;2647;2648;2649;2650;2651;2652;2653;2806;3003;6611;6612;6613;8205;8748;8749;8750;8751;8752;8753;8754;9392;9685;9686;9687;9688;9689;9690;9691;9692;9693;9694;9695;9696;9697;9698;9699;10136;10137;10138;10139;10140;10141;10142;10143;10144;10145;10146;10147;10148;10149;10150;10151;10152;10153;1…	1047;2652;2806;3003;6611;8205;8751;9392;9687;10141;10153;10836;11229;11234	523;524;525;526;527;528	140;190;194;198;200;214
O00264;O00264-2	O00264;O00264-2	14;10	14;10	13;10	Membrane-associated progesterone receptor component 1	PGRMC1	sp|O00264|PGRC1_HUMAN Membrane-associated progesterone receptor component 1 OS=Homo sapiens OX=9606 GN=PGRMC1 PE=1 SV=3;sp|O00264-2|PGRC1_HUMAN Isoform 2 of Membrane-associated progesterone receptor component 1 OS=Homo sapiens OX=9606 GN=PGRMC1	2	14	14	13	63.1	63.1	58.5	21671	195	195;143	0	308.22	60411000000	5491900000	26				416	808;832;833;1177;1299;1300;1718;1999;2058;2189;2819;3016;4955;4967	True;True;True;True;True;True;True;True;True;True;True;True;True;True	865;890;891;1259;1391;1392;1837;2137;2199;2336;2997;2998;3207;5302;5317	1294;1295;1296;1297;1322;1323;1324;1867;1868;2208;2209;2210;2779;3181;3257;3258;3510;4719;4720;4721;4989;8053;8078;8079	1360;1361;1362;1363;1364;1365;1390;1391;1392;1979;1980;2400;2401;2402;2991;3403;3481;3482;3790;5159;5160;5161;5434;8733;8759;8760	1361;1390;1391;1979;2400;2402;2991;3403;3481;3790;5159;5434;8733;8759	141	91
Q9NZ01;M0R2N5;Q9NZ01-2;M0R3C3;M0R329	Q9NZ01;M0R2N5	14;12;5;4;3	14;12;5;4;3	14;12;5;4;3	Very-long-chain enoyl-CoA reductase	TECR	sp|Q9NZ01|TECR_HUMAN Very-long-chain enoyl-CoA reductase OS=Homo sapiens OX=9606 GN=TECR PE=1 SV=1;tr|M0R2N5|M0R2N5_HUMAN Very-long-chain enoyl-CoA reductase OS=Homo sapiens OX=9606 GN=TECR PE=1 SV=1	5	14	14	14	39	39	39	36034	308	308;346;157;105;150	0	136.2	57309000000	3183800000	35				1084	797;944;1935;2573;2601;3088;3539;3733;4109;4156;5221;5611;5977;6252	True;True;True;True;True;True;True;True;True;True;True;True;True;True	854;1008;2068;2069;2743;2773;3284;3752;3955;4377;4378;4450;4451;5587;6000;6386;6678	1279;1516;3065;3066;3067;3068;3069;3070;4295;4296;4297;4298;4336;4337;5137;5818;5819;6081;6082;6083;6641;6642;6643;6644;6822;6823;6824;8429;8430;9165;9166;9167;9675;9676;10102;10103	1345;1594;3281;3282;3283;3284;3285;3286;4681;4682;4683;4684;4722;4723;4724;5596;6340;6341;6607;6608;6609;7197;7198;7199;7200;7407;7408;7409;9118;9119;9943;9944;9945;10482;10483;10936;10937	1345;1594;3284;4683;4722;5596;6340;6608;7199;7408;9119;9944;10482;10937	540;541;542	1;156;301
P27797;K7EJB9;K7EL50	P27797;K7EJB9	23;15;6	23;15;6	23;15;6	Calreticulin	CALR	sp|P27797|CALR_HUMAN Calreticulin OS=Homo sapiens OX=9606 GN=CALR PE=1 SV=1;tr|K7EJB9|K7EJB9_HUMAN Calreticulin (Fragment) OS=Homo sapiens OX=9606 GN=CALR PE=1 SV=1	3	23	23	23	69.1	69.1	69.1	48141	417	417;247;163	0	323.31	79724000000	2749100000	72				603	662;779;993;1525;1969;1992;1996;1997;2219;2289;2348;2428;2649;2650;2662;2663;2776;3112;3136;3342;4515;5139;6061	True;True;True;True;True;True;True;True;True;True;True;True;True;True;True;True;True;True;True;True;True;True;True	713;836;1063;1633;2107;2130;2134;2135;2369;2445;2507;2592;2823;2824;2837;2838;2952;3308;3309;3334;3548;3549;3550;4850;5504;6476	1072;1073;1074;1075;1246;1247;1248;1631;1632;2525;2526;3144;3172;3173;3178;3179;3550;3551;3749;3750;3751;3926;4044;4045;4046;4484;4485;4486;4487;4501;4502;4503;4504;4505;4506;4660;4661;4662;5168;5169;5170;5171;5172;5173;5207;5208;5506;5507;5508;5509;5510;5511;5512;5513;5514;5515;7438;7439;8311;8312;8313;8314;8315;8316;9792;9793;9794	1126;1127;1128;1129;1310;1311;1312;1733;1734;2726;2727;3366;3394;3395;3400;3401;3830;3831;4071;4072;4073;4074;4276;4277;4399;4400;4401;4402;4908;4909;4910;4911;4925;4926;4927;4928;4929;4930;4931;4932;5099;5100;5101;5629;5630;5631;5632;5633;5634;5668;5669;6002;6003;6004;6005;6006;6007;6008;6009;6010;6011;6012;6013;6014;8088;8089;8994;8995;8996;8997;8998;8999;9000;10601;10602;10603	1129;1312;1733;2726;3366;3394;3400;3401;3830;4071;4277;4402;4908;4911;4926;4931;5101;5632;5668;6008;8088;8995;10601	290;291;292	122;131;257
Q9Y6A9;C9JBL1;X6R2S6	Q9Y6A9;C9JBL1;X6R2S6	2;1;1	2;1;1	2;1;1	Signal peptidase complex subunit 1	SPCS1	sp|Q9Y6A9|SPCS1_HUMAN Signal peptidase complex subunit 1 OS=Homo sapiens OX=9606 GN=SPCS1 PE=1 SV=4;tr|C9JBL1|C9JBL1_HUMAN Signal peptidase complex subunit 1 OS=Homo sapiens OX=9606 GN=SPCS1 PE=1 SV=1;tr|X6R2S6|X6R2S6_HUMAN Signal peptidase complex subunit	3	2	2	2	2020-05-26	2020-05-26	2020-05-26	11805	102	102;80;169	0	52485	5200100000	2600000000	9				1145	4116;6520	True;True	4388;4389;4390;6963	6654;6655;6656;6657;6658;6659;6660;6661;10544	7211;7212;7213;7214;7215;7216;7217;7218;11407	7218;11407	581;582	1;12
P04264;CON__P04264;CON__H-INV:HIT000016045;F8VP67;Q08378-4;Q08378-2;Q08378	P04264;CON__P04264	46;43;4;4;1;1;1	46;43;4;4;1;1;1	28;25;0;0;0;0;0	Keratin, type II cytoskeletal 1	KRT1	sp|P04264|K2C1_HUMAN Keratin, type II cytoskeletal 1 OS=Homo sapiens OX=9606 GN=KRT1 PE=1 SV=6;	7	46	46	28	50.6	50.6	41.3	66038	644	644;644;99;113;1134;1390;1498	0	323.31	97394000000	2497300000	70			+	523	134;461;1095;1134;1842;1843;2075;2298;2678;3050;3181;3260;3272;3273;3611;3663;3664;3792;4329;4331;4332;4387;4439;4787;4788;4999;5068;5086;5172;5180;5192;5193;5194;5234;5235;5257;5610;5675;5713;5714;5941;5948;6495;6589;6590;6591	True;True;True;True;True;True;True;True;True;True;True;True;True;True;True;True;True;True;True;True;True;True;True;True;True;True;True;True;True;True;True;True;True;True;True;True;True;True;True;True;True;True;True;True;True;True	147;498;1170;1171;1212;1213;1969;1970;2216;2454;2853;3244;3245;3382;3464;3476;3477;3826;3882;3883;4015;4648;4650;4651;4713;4714;4715;4770;5131;5132;5351;5425;5445;5538;5546;5558;5559;5560;5600;5601;5623;5999;6065;6107;6108;6349;6357;6936;7039;7040;7041	238;774;1764;1765;1812;1813;2935;2936;2937;3279;3761;4525;5087;5088;5089;5268;5269;5270;5367;5379;5380;5381;5919;5990;5991;5992;6156;7144;7145;7147;7148;7149;7150;7227;7228;7229;7230;7326;7805;7806;7807;8123;8210;8232;8359;8360;8361;8375;8376;8392;8393;8394;8395;8396;8397;8444;8445;8561;9162;9163;9164;9239;9294;9295;9296;9632;9640;10516;10660;10661;10662;10663;10664;10665	252;810;1874;1875;1922;1923;3149;3150;3151;3504;4084;4951;5544;5545;5546;5732;5733;5734;5833;5845;5846;5847;6443;6514;6515;6516;6682;7767;7768;7770;7771;7772;7773;7851;7852;7853;7854;7968;8464;8465;8466;8804;8892;8914;9047;9048;9049;9063;9064;9081;9082;9083;9084;9085;9086;9134;9135;9271;9939;9940;9941;9942;10020;10075;10076;10077;10439;10447;11379;11532;11533;11534;11535;11536;11537	252;810;1874;1923;3149;3151;3504;4084;4951;5546;5732;5833;5845;5847;6443;6514;6516;6682;7767;7770;7772;7854;7968;8464;8466;8804;8892;8914;9047;9063;9082;9085;9086;9134;9135;9271;9941;10020;10075;10077;10439;10447;11379;11532;11533;11535	70;195;196;197	259;262;296;469
O15173;O15173-2;U3KQM0;D3DNX8	O15173;O15173-2;U3KQM0	12;12;7;3	11;11;6;3	11;11;6;3	Membrane-associated progesterone receptor component 2	PGRMC2	sp|O15173|PGRC2_HUMAN Membrane-associated progesterone receptor component 2 OS=Homo sapiens OX=9606 GN=PGRMC2 PE=1 SV=1;sp|O15173-2|PGRC2_HUMAN Isoform 2 of Membrane-associated progesterone receptor component 2 OS=Homo sapiens OX=9606 GN=PGRMC2;tr|U3KQM0|U	4	12	11	11	47.5	43.5	43.5	23818	223	223;247;91;44	0	257.02	29696000000	2474700000	16				440	754;755;807;827;1660;1998;2189;2196;2813;3565;4533;4954	True;True;True;True;True;True;False;True;True;True;True;True	810;811;812;864;884;1776;2136;2336;2343;2990;3778;4868;5301	1211;1212;1213;1214;1215;1293;1316;2704;3180;3510;3517;3518;4712;5859;5860;7457;8052	1273;1274;1275;1276;1277;1359;1384;2915;3402;3790;3797;3798;5152;6383;6384;8107;8732	1275;1277;1359;1384;2915;3402;3790;3797;5152;6384;8107;8732	154;155	180;188
A0A0G2JIW1;P0DMV9;P0DMV8;P0DMV8-2;V9GZ37	A0A0G2JIW1;P0DMV9;P0DMV8;P0DMV8-2;V9GZ37	37;37;37;31;26	37;37;37;31;26	21;21;21;16;13	Heat shock 70 kDa protein 1B;Heat shock 70 kDa protein 1A	HSPA1B;HSPA1A	tr|A0A0G2JIW1|A0A0G2JIW1_HUMAN Heat shock 70 kDa protein 1B OS=Homo sapiens OX=9606 GN=HSPA1B PE=1 SV=1;sp|P0DMV9|HS71B_HUMAN Heat shock 70 kDa protein 1B OS=Homo sapiens OX=9606 GN=HSPA1B PE=1 SV=1;sp|P0DMV8|HS71A_HUMAN Heat shock 70 kDa protein 1A OS=Hom	5	37	37	21	71.3	71.3	39.9	70108	642	642;641;641;586;476	0	323.31	80375000000	2115100000	108				69	13;198;451;465;514;694;977;1352;1398;1737;1750;1777;2374;2596;2597;2766;2974;3073;3255;3598;3599;3938;3939;4214;4233;4431;4894;5029;5099;5100;5165;5389;5691;5805;6304;6305;6672	True;True;True;True;True;True;True;True;True;True;True;True;True;True;True;True;True;True;True;True;True;True;True;True;True;True;True;True;True;True;True;True;True;True;True;True;True	14;215;216;488;502;551;746;1045;1445;1492;1858;1872;1901;1902;2535;2768;2769;2941;3162;3268;3269;3459;3811;3812;4167;4168;4522;4523;4544;4760;5239;5381;5460;5461;5462;5530;5531;5763;6083;6207;6733;6734;7131	15;312;313;314;315;316;759;760;761;762;778;779;839;840;1113;1114;1115;1116;1611;2278;2279;2335;2336;2337;2806;2820;2856;2857;3963;3964;3965;3966;3967;3968;3969;3970;3971;3972;3973;3974;3975;3976;4329;4330;4331;4332;4641;4642;4643;4644;4929;5117;5118;5119;5362;5900;5901;6356;6357;6358;6359;6360;6910;6911;6912;6913;6914;6915;6916;6917;6918;6919;6920;6921;6945;7286;7959;7960;8160;8250;8251;8252;8253…	15;326;327;328;329;330;795;796;797;798;814;815;875;876;1168;1169;1170;1171;1713;2472;2473;2529;2530;2531;2532;2533;3018;3032;3068;3069;4315;4316;4317;4318;4319;4320;4321;4322;4323;4324;4325;4326;4327;4328;4329;4330;4715;4716;4717;4718;5079;5080;5081;5082;5374;5574;5575;5576;5828;6424;6425;6894;6895;6896;6897;6898;7497;7498;7499;7500;7501;7502;7503;7504;7505;7506;7507;7508;7509;7510;7511;7512;7513…	15;326;796;815;876;1168;1713;2472;2531;3018;3032;3069;4315;4716;4718;5080;5374;5575;5828;6424;6425;6895;6896;7497;7538;7914;8637;8841;8934;8937;9032;9454;10043;10242;11012;11013;11651	26;27;28;29;30;31	88;123;382;411;519;550
Q9P035;H3BS72;H3BPZ1;Q9P035-2;H3BRL8;H3BMZ1	Q9P035;H3BS72;H3BPZ1;Q9P035-2	16;15;14;10;7;4	16;15;14;10;7;4	16;15;14;10;7;4	Very-long-chain (3R)-3-hydroxyacyl-CoA dehydratase 3	HACD3	sp|Q9P035|HACD3_HUMAN Very-long-chain (3R)-3-hydroxyacyl-CoA dehydratase 3 OS=Homo sapiens OX=9606 GN=HACD3 PE=1 SV=2;tr|H3BS72|H3BS72_HUMAN Very-long-chain (3R)-3-hydroxyacyl-CoA dehydratase OS=Homo sapiens OX=9606 GN=HACD3 PE=1 SV=1;tr|H3BPZ1|H3BPZ1_HUMA	6	16	16	16	45.9	45.9	45.9	43159	362	362;400;337;307;245;139	0	198.22	38665000000	2035000000	32				1090	1707;1931;2052;2053;3315;3316;3791;4064;4574;4920;4992;5974;6196;6331;6514;6792	True;True;True;True;True;True;True;True;True;True;True;True;True;True;True;True	1825;2064;2193;2194;3521;3522;4014;4321;4322;4913;5267;5344;6383;6617;6762;6956;6957;7257	2765;3061;3246;3247;3248;3249;3250;3251;3252;5452;5453;5454;6154;6155;6572;6573;6574;7511;7994;8114;9670;9671;10004;10251;10252;10253;10537;10538;10936	2976;3277;3468;3469;3470;3471;3472;3473;3474;3475;3476;5936;5937;5938;6680;6681;7126;7127;7128;7129;8161;8672;8795;10477;10478;10833;11091;11092;11093;11400;11401;11814;11815	2976;3277;3469;3474;5936;5938;6681;7126;8161;8672;8795;10478;10833;11091;11401;11814	544;545	1;118
P57088;D6RAA6;H0Y8N0;J3KN43;D6RBY2	P57088;D6RAA6	11;9;3;2;2	11;9;3;2;2	11;9;3;2;2	Transmembrane protein 33	TMEM33	sp|P57088|TMM33_HUMAN Transmembrane protein 33 OS=Homo sapiens OX=9606 GN=TMEM33 PE=1 SV=2;tr|D6RAA6|D6RAA6_HUMAN Transmembrane protein 33 (Fragment) OS=Homo sapiens OX=9606 GN=TMEM33 PE=1 SV=1	5	11	11	11	52.6	52.6	52.6	27978	247	247;222;155;68;68	0	86606	28397000000	1774800000	18				689	132;331;2308;3021;3235;3276;3352;3711;3793;4493;5665	True;True;True;True;True;True;True;True;True;True;True	144;145;358;2464;3212;3213;3439;3480;3560;3932;4016;4828;6055	234;235;236;533;3803;4997;4998;4999;5338;5339;5340;5384;5526;6053;6054;6157;7410;9229	248;249;250;553;4132;5442;5443;5444;5804;5805;5806;5850;6025;6579;6580;6683;8055;10010	249;553;4132;5443;5805;5850;6025;6579;6683;8055;10010	358;359	19;220
Q9BQA1;Q9BQA1-2;H0Y711	Q9BQA1;Q9BQA1-2;H0Y711	13;9;8	13;9;8	13;9;8	Methylosome protein 50	WDR77	sp|Q9BQA1|MEP50_HUMAN Methylosome protein 50 OS=Homo sapiens OX=9606 GN=WDR77 PE=1 SV=1;sp|Q9BQA1-2|MEP50_HUMAN Isoform 2 of Methylosome protein 50 OS=Homo sapiens OX=9606 GN=WDR77;tr|H0Y711|H0Y711_HUMAN Methylosome protein 50 (Fragment) OS=Homo sapiens OX	3	13	13	13	76.9	76.9	76.9	36724	342	342;278;291	0	261.14	20919000000	1494200000	28				997	242;724;766;992;1068;1664;2171;2818;3069;4506;5057;6440;6598	True;True;True;True;True;True;True;True;True;True;True;True;True	263;780;823;1062;1141;1780;1781;2316;2996;3264;4841;5410;6880;7048	370;371;372;1163;1164;1231;1232;1233;1630;1724;2708;2709;3440;3441;3442;3443;3444;3445;3446;4718;5112;5113;7424;7425;8190;10447;10448;10449;10672;10673	384;385;386;1220;1221;1293;1294;1295;1296;1732;1830;2919;2920;3700;3701;3702;3703;3704;3705;3706;5158;5569;5570;8069;8070;8871;11307;11308;11309;11544;11545	385;1221;1296;1732;1830;2919;3700;5158;5570;8070;8871;11307;11545	495	27
P13645;CON__P13645;CON__P02535-1;CON__Q7Z3Y7;Q7Z3Y7;CON__Q148H6;CON__Q2M2I5;CON__Q7Z3Z0;Q7Z3Y8;CON__Q7Z3Y8;Q2M2I5;Q7Z3Z0;F8VZY9;CON__O76015;CON__Q497I4;CON__A2AB72;CON__O76013;CON__Q7Z3Y9;CON__O76014;CON__REFSEQ:XP_986630;CON__Q9UE12;CON__Q14532;CON__Q99456;A0A3B3ITG2;C4AM86;CON__Q14525;CON__Q92764;CON__A2A5Y0;Q14532;O76015;P05783;O76013;O76014;O76013-2;Q7Z3Y9;Q15323;Q99456;Q14525;CON__Q15323;CON…	P13645;CON__P13645	33;33;10;4;4;3;2;2;2;2;2;2;1;1;1;1;1;1;1;1;1;1;1;1;1;1;1;1;1;1;1;1;1;1;1;1;1;1;1;1;1	33;33;10;4;4;3;2;2;2;2;2;2;1;1;1;1;1;1;1;1;1;1;1;1;1;1;1;1;1;1;1;1;1;1;1;1;1;1;1;1;1	28;28;6;2;2;1;0;1;1;1;0;1;0;0;0;0;0;0;0;0;0;0;0;0;0;0;0;0;0;0;0;0;0;0;0;0;0;0;0;0;0	Keratin, type I cytoskeletal 10	KRT10	sp|P13645|K1C10_HUMAN Keratin, type I cytoskeletal 10 OS=Homo sapiens OX=9606 GN=KRT10 PE=1 SV=6;	41	33	33	28	54.6	54.6	48.3	58826	584	584;593;570;486;464;464;525;450;459;459;525;450;391;456;455;453;467;468;471;476;416;448;494;206;425;404;425;416;448;456;430;467;449;417;468;416;494;404;416;423;455	0	323.31	41861000000	1350400000	73			+	198	119;120;163;312;736;1452;2305;2777;2932;3040;3150;3213;3305;3505;4297;4427;4476;4479;4881;4884;4885;5088;5089;5182;5223;5338;5339;5623;6122;6123;6368;6567;6601	True;True;True;True;True;True;True;True;True;True;True;True;True;True;True;True;True;True;True;True;True;True;True;True;True;True;True;True;True;True;True;True;True	129;130;131;132;178;338;792;1549;2461;2953;3120;3234;3351;3414;3511;3718;4614;4615;4756;4809;4812;4813;4814;5226;5229;5230;5447;5448;5548;5589;5710;5711;6013;6541;6542;6800;6801;7012;7051	211;212;213;214;215;216;217;218;219;220;271;477;1189;2410;2411;3770;4663;4664;4866;4867;5044;5045;5230;5231;5310;5311;5442;5728;5729;7092;7093;7094;7280;7281;7373;7374;7375;7376;7377;7378;7379;7380;7381;7382;7385;7386;7387;7388;7389;7390;7391;7943;7946;7947;8234;8235;8236;8381;8432;8664;8665;9182;9183;9876;9877;10317;10318;10621;10676	221;222;223;224;225;226;227;228;229;230;231;232;233;234;285;495;1249;2607;2608;4094;5102;5103;5311;5312;5491;5492;5691;5692;5776;5777;5926;6231;6232;7711;7712;7713;7714;7908;7909;8017;8018;8019;8020;8021;8022;8023;8024;8025;8026;8027;8030;8031;8032;8033;8034;8035;8036;8619;8622;8623;8916;8917;8918;9070;9121;9375;9376;9963;9964;10687;10688;11165;11166;11489;11548	223;233;285;495;1249;2608;4094;5102;5311;5491;5692;5777;5926;6232;7714;7908;8019;8036;8619;8622;8623;8916;8918;9070;9121;9375;9376;9963;10687;10688;11165;11489;11548	76;78;79;80;81	150;271;291;306;321
P04843;B7Z4L4;F8WF32	P04843;B7Z4L4	34;26;5	34;26;5	34;26;5	Dolichyl-diphosphooligosaccharide--protein glycosyltransferase subunit 1	RPN1	sp|P04843|RPN1_HUMAN Dolichyl-diphosphooligosaccharide--protein glycosyltransferase subunit 1 OS=Homo sapiens OX=9606 GN=RPN1 PE=1 SV=1;tr|B7Z4L4|B7Z4L4_HUMAN Dolichyl-diphosphooligosaccharide--protein glycosyltransferase subunit 1 OS=Homo sapiens OX=9606	3	34	34	34	62.6	62.6	62.6	68569	607	607;435;121	0	323.31	62754000000	1280700000	70				525	364;408;409;538;899;900;1086;1110;1905;1962;2065;2432;2655;2762;2961;3048;3177;3247;3729;4379;4468;4651;4754;4858;5078;5543;5613;5633;5816;5880;5881;6062;6074;6344	True;True;True;True;True;True;True;True;True;True;True;True;True;True;True;True;True;True;True;True;True;True;True;True;True;True;True;True;True;True;True;True;True;True	393;443;444;579;960;961;1160;1186;2038;2100;2206;2596;2829;2937;3149;3242;3378;3451;3951;4701;4800;4991;5096;5203;5435;5928;6002;6023;6219;6285;6286;6477;6478;6490;6775	578;680;681;682;683;684;872;873;874;875;876;1429;1430;1431;1750;1782;3027;3131;3132;3133;3134;3135;3268;4050;4051;4493;4636;4910;4911;4912;5085;5260;5261;5262;5263;5352;6076;7211;7212;7213;7360;7361;7604;7732;7733;7917;8220;8987;9170;9171;9194;9474;9475;9554;9555;9556;9557;9795;9796;9797;9798;9810;9811;9812;10286;10287	598;710;711;712;713;714;909;910;911;912;913;914;1505;1506;1507;1859;1892;3243;3352;3353;3354;3355;3356;3357;3492;3493;4406;4407;4917;5074;5355;5356;5357;5542;5723;5724;5725;5726;5818;6602;7835;7836;7837;8003;8004;8255;8385;8386;8593;8902;9723;9948;9949;9950;9951;9952;9975;10274;10275;10360;10361;10362;10363;10604;10605;10606;10607;10619;10620;10621;11133;11134	598;711;714;909;1505;1507;1859;1892;3243;3352;3493;4406;4917;5074;5355;5542;5724;5818;6602;7836;8003;8255;8385;8593;8902;9723;9951;9975;10274;10361;10363;10607;10619;11133	198	230
A0A0C4DGS1;P39656;P39656-3;P39656-2;U3KQ84	A0A0C4DGS1;P39656;P39656-3;P39656-2	20;20;19;18;8	20;20;19;18;8	20;20;19;18;8	Dolichyl-diphosphooligosaccharide--protein glycosyltransferase 48 kDa subunit	DDOST	tr|A0A0C4DGS1|A0A0C4DGS1_HUMAN Dolichyl-diphosphooligosaccharide--protein glycosyltransferase 48 kDa subunit OS=Homo sapiens OX=9606 GN=DDOST PE=1 SV=1;sp|P39656|OST48_HUMAN Dolichyl-diphosphooligosaccharide--protein glycosyltransferase 48 kDa subunit OS=H	5	20	20	20	59.2	59.2	59.2	48799	439	439;456;438;419;154	0	323.31	33565000000	1243100000	37				65	431;1045;1412;1589;2097;2363;2364;2664;3427;3698;4455;4563;4590;5363;5505;5702;6023;6076;6549;6778	True;True;True;True;True;True;True;True;True;True;True;True;True;True;True;True;True;True;True;True	468;1117;1506;1699;2240;2522;2523;2524;2525;2839;3638;3919;4787;4901;4929;5736;5888;6094;6435;6492;6994;7243	714;1696;2354;2611;2612;3335;3943;3944;3945;3946;3947;3948;4507;5625;6037;6038;7346;7496;7497;7531;7532;8693;8934;8935;8936;9281;9736;9737;9815;9816;9817;9818;10601;10919;10920	744;1802;2550;2821;2822;3579;4295;4296;4297;4298;4299;4300;4933;6126;6562;6563;7988;8146;8147;8181;8182;9404;9664;9665;9666;10062;10545;10546;10624;10625;10626;10627;10628;10629;11468;11797;11798	744;1802;2550;2822;3579;4297;4300;4933;6126;6562;7988;8147;8182;9404;9665;10062;10545;10625;11468;11797	25	185
P16615;P16615-5;P16615-2;P16615-3;P16615-4;H7C5W9;O14983-2;O14983;O14983-3;Q93084-5;Q93084-6;Q93084;Q93084-3;Q93084-7;Q93084-2;Q93084-4;J3QSY6;H3BTW4;H3BVB2;A0A0C4DH86	P16615;P16615-5;P16615-2;P16615-3;P16615-4;H7C5W9	47;46;46;46;46;43;15;15;14;9;9;9;9;9;9;9;2;2;1;1	47;46;46;46;46;43;15;15;14;9;9;9;9;9;9;9;2;2;1;1	47;46;46;46;46;43;15;15;14;9;9;9;9;9;9;9;2;2;1;1	Sarcoplasmic/endoplasmic reticulum calcium ATPase 2	ATP2A2	sp|P16615|AT2A2_HUMAN Sarcoplasmic/endoplasmic reticulum calcium ATPase 2 OS=Homo sapiens OX=9606 GN=ATP2A2 PE=1 SV=1;sp|P16615-5|AT2A2_HUMAN Isoform 5 of Sarcoplasmic/endoplasmic reticulum calcium ATPase 2 OS=Homo sapiens OX=9606 GN=ATP2A2;sp|P16615-2|AT2	20	47	47	47	52.4	52.4	52.4	114.76	1042	1042;997;997;999;1015;933;994;1001;869;1052;1044;1043;1029;1033;999;998;50;128;113;46	0	323.31	72923000000	1195500000	90				571	146;286;390;396;664;734;786;1197;1259;1278;1289;1511;1661;1668;2022;2323;2564;2634;2684;2709;2857;2929;2950;2992;3038;3243;4061;4075;4076;4383;4653;4962;4975;5239;5271;5493;5601;5736;5818;5949;5969;6020;6090;6268;6318;6506;6608	True;True;True;True;True;True;True;True;True;True;True;True;True;True;True;True;True;True;True;True;True;True;True;True;True;True;True;True;True;True;True;True;True;True;True;True;True;True;True;True;True;True;True;True;True;True;True	159;310;311;423;424;430;715;790;843;1282;1347;1348;1369;1381;1619;1777;1785;1786;2160;2480;2734;2808;2859;2884;3041;3116;3117;3138;3180;3181;3231;3232;3447;4318;4334;4335;4336;4337;4706;4707;4993;5309;5310;5325;5605;5640;5875;5876;5989;5990;6130;6221;6358;6378;6432;6506;6507;6694;6695;6749;6947;7058;7059	251;443;444;655;656;657;664;1077;1186;1257;1258;1892;1970;1971;1972;1973;2061;2076;2077;2078;2508;2705;2713;2714;3209;3891;4283;4284;4465;4532;4560;4777;4861;4862;4863;4896;4955;4956;4957;4958;4959;5037;5038;5039;5040;5041;5042;5348;6569;6587;6588;6589;6590;6591;7219;7220;7606;8062;8063;8064;8089;8471;8579;8910;8911;8912;8913;8914;8915;8916;8917;9149;9150;9320;9477;9478;9641;9642;9664;9732;9833;9…	265;461;462;685;686;687;694;1131;1245;1246;1321;1322;2006;2090;2091;2092;2093;2199;2214;2215;2216;2709;2916;2924;2925;3431;4241;4668;4669;4887;4958;4986;5220;5306;5307;5308;5341;5400;5401;5402;5403;5404;5484;5485;5486;5487;5488;5489;5814;7123;7142;7143;7144;7145;7146;7843;7844;8257;8742;8743;8744;8770;9166;9289;9638;9639;9640;9641;9642;9643;9644;9645;9926;9927;10101;10277;10278;10448;10449;10471;…	265;461;686;694;1131;1245;1321;2006;2090;2199;2214;2709;2916;2924;3431;4241;4668;4887;4958;4986;5220;5307;5341;5403;5486;5814;7123;7142;7145;7844;8257;8743;8770;9166;9289;9640;9927;10101;10278;10448;10471;10541;10644;10956;11078;11390;11556	260;261;262;263;264;265;266;267;268;269;270;271;272;273	126;207;220;239;361;366;536;575;598;622;699;719;732;756
Q99735-2;Q99735	Q99735-2;Q99735	2;2	2;2	2;2	Microsomal glutathione S-transferase 2	MGST2	sp|Q99735-2|MGST2_HUMAN Isoform 2 of Microsomal glutathione S-transferase 2 OS=Homo sapiens OX=9606 GN=MGST2;sp|Q99735|MGST2_HUMAN Microsomal glutathione S-transferase 2 OS=Homo sapiens OX=9606 GN=MGST2 PE=1 SV=1	2	2	2	2	53.2	53.2	53.2	83587	77	77;147	0	18144	3585800000	1195300000	3				991	226;6370	True;True	244;6803	348;10320;10321	362;11168;11169	362;11169
Q9BVC6	Q9BVC6	3	3	3	Transmembrane protein 109	TMEM109	sp|Q9BVC6|TM109_HUMAN Transmembrane protein 109 OS=Homo sapiens OX=9606 GN=TMEM109 PE=1 SV=1	1	3	3	3	2020-03-12	2020-03-12	2020-03-12	26.21	243	243	0	18896	14282000000	1190200000	4				1017	479;811;1186	True;True;True	516;868;1268	795;796;1300;1878	831;832;1368;1992	831;1368;1992
Q15125;C9J719;C9JJ78	Q15125;C9J719;C9JJ78	3;2;2	3;2;2	3;2;2	3-beta-hydroxysteroid-Delta(8),Delta(7)-isomerase	EBP	sp|Q15125|EBP_HUMAN 3-beta-hydroxysteroid-Delta(8),Delta(7)-isomerase OS=Homo sapiens OX=9606 GN=EBP PE=1 SV=3;tr|C9J719|C9J719_HUMAN 3-beta-hydroxysteroid-Delta(8),Delta(7)-isomerase (Fragment) OS=Homo sapiens OX=9606 GN=EBP PE=1 SV=8;tr|C9JJ78|C9JJ78_HUM	3	3	3	3	2020-05-16	2020-05-16	2020-05-16	26352	230	230;145;160	0	51554	8289100000	1184200000	8				771	84;2509;5804	True;True;True	91;2676;6206	157;4210;4211;4212;4213;4214;9443	162;4592;4593;4594;4595;4596;4597;4598;10241	162;4593;10241
P04844;P04844-2;Q5JYR3;H0Y5M1	P04844;P04844-2	28;26;4;4	28;26;4;4	14;14;4;4	Dolichyl-diphosphooligosaccharide--protein glycosyltransferase subunit 2	RPN2	sp|P04844|RPN2_HUMAN Dolichyl-diphosphooligosaccharide--protein glycosyltransferase subunit 2 OS=Homo sapiens OX=9606 GN=RPN2 PE=1 SV=3;sp|P04844-2|RPN2_HUMAN Isoform 2 of Dolichyl-diphosphooligosaccharide--protein glycosyltransferase subunit 2 OS=Homo sap	4	28	28	14	70.5	70.5	2020-07-31	69283	631	631;615;138;147	0	323.31	35278000000	1138000000	55				526	99;486;544;930;1218;1273;1748;1749;1898;1944;2329;2958;3245;3644;3645;3784;4110;4275;4416;4530;4729;4730;5175;5284;5597;5767;6654;6681	True;True;True;True;True;True;True;True;True;True;True;True;True;True;True;True;True;True;True;True;True;True;True;True;True;True;True;True	107;523;586;994;1303;1364;1870;1871;2031;2079;2486;3146;3449;3860;3861;3862;4007;4379;4380;4591;4744;4865;5069;5070;5541;5654;5985;6163;6164;7110;7140	173;804;805;806;885;1496;1497;1498;1917;2052;2053;2054;2818;2819;3018;3019;3082;3083;3084;3901;4906;5350;5962;5963;5964;5965;5966;6144;6145;6645;6646;7025;7262;7263;7264;7265;7266;7454;7694;7695;7696;7697;8366;8595;9145;9365;9366;9367;9368;10749;10750;10788	178;840;841;842;923;1574;1575;1576;2031;2032;2033;2190;2191;2192;3030;3031;3234;3235;3299;3300;3301;4251;5351;5816;6486;6487;6488;6489;6490;6670;6671;7201;7202;7626;7889;7890;7891;7892;7893;7894;8104;8346;8347;8348;8349;9054;9305;9921;9922;10156;10157;10158;10159;11622;11623;11662	178;842;923;1574;2031;2191;3030;3031;3234;3299;4251;5351;5816;6489;6490;6670;7202;7626;7889;8104;8346;8349;9054;9305;9921;10158;11622;11662	199;200;201	219;337;620
P35527;CON__P35527;K7EQQ3	P35527;CON__P35527;K7EQQ3	25;25;14	25;25;14	25;25;14	Keratin, type I cytoskeletal 9	KRT9	sp|P35527|K1C9_HUMAN Keratin, type I cytoskeletal 9 OS=Homo sapiens OX=9606 GN=KRT9 PE=1 SV=3;;tr|K7EQQ3|K7EQQ3_HUMAN Keratin, type I cytoskeletal 9 OS=Homo sapiens OX=9606 GN=KRT9 PE=1 SV=1	3	25	25	25	37.4	37.4	37.4	62064	623	623;623;390	0	323.31	34490000000	1077800000	51			+	203	884;1026;1358;1751;1945;2253;2455;2456;2778;2907;2908;3212;4194;4490;4491;4741;4766;4767;4915;5062;5063;5393;5674;5682;6283	True;True;True;True;True;True;True;True;True;True;True;True;True;True;True;True;True;True;True;True;True;True;True;True;True	944;1097;1451;1873;1874;2080;2406;2621;2622;2954;2955;3093;3094;3413;4496;4497;4825;4826;5081;5108;5109;5110;5261;5262;5416;5417;5418;5419;5420;5767;5768;6064;6073;6074;6711	1409;1410;1671;2285;2286;2821;2822;3085;3622;4086;4087;4088;4665;4666;4667;4668;4669;4670;4671;4833;4834;4835;5309;6873;6874;7404;7405;7406;7407;7712;7747;7748;7749;7988;7989;8198;8199;8200;8201;8202;8203;8204;8205;8741;8742;8743;9238;9247;9248;9249;9250;10150;10151	1485;1486;1774;2479;2480;3033;3034;3302;3920;4442;4443;4444;5104;5105;5106;5107;5108;5109;5110;5278;5279;5280;5775;7459;7460;8049;8050;8051;8052;8364;8401;8402;8403;8666;8667;8880;8881;8882;8883;8884;8885;8886;8887;9459;9460;9461;10019;10028;10029;10030;10031;10986;10987	1486;1774;2480;3033;3302;3920;4442;4444;5109;5278;5280;5775;7460;8049;8052;8364;8401;8403;8666;8884;8887;9460;10019;10031;10986	85;86;87;88;89;90;91	157;234;245;269;276;286;326
P27824;P27824-2;P27824-3;D6RGY2;H0Y9Q7;D6RFL1;D6RDP7;D6RB85;H0Y9H1;D6RAU8;D6RAQ8;D6RHJ3;D6RD16	P27824;P27824-2;P27824-3	34;34;28;14;11;9;9;8;8;7;4;1;1	34;34;28;14;11;9;9;8;8;7;4;1;1	33;33;27;13;11;8;9;8;7;7;4;1;1	Calnexin	CANX	sp|P27824|CALX_HUMAN Calnexin OS=Homo sapiens OX=9606 GN=CANX PE=1 SV=2;sp|P27824-2|CALX_HUMAN Isoform 2 of Calnexin OS=Homo sapiens OX=9606 GN=CANX;sp|P27824-3|CALX_HUMAN Isoform 3 of Calnexin OS=Homo sapiens OX=9606 GN=CANX	13	34	34	33	55.4	55.4	54.4	67567	592	592;627;484;308;170;131;168;144;189;134;107;78;96	0	323.31	39069000000	1028100000	58				604	139;435;640;641;793;1355;2227;2336;2879;2894;2989;3043;3086;3113;3124;3125;3432;4524;4577;4896;4897;4988;5050;5051;5516;5517;5593;5608;5728;5748;5864;6497;6511;6578	True;True;True;True;True;True;True;True;True;True;True;True;True;True;True;True;True;True;True;True;True;True;True;True;True;True;True;True;True;True;True;True;True;True	152;472;689;690;850;1448;2377;2495;3064;3080;3177;3237;3282;3310;3321;3322;3644;4859;4916;5241;5242;5339;5403;5404;5899;5900;5981;5997;6122;6143;6144;6268;6938;6952;6953;7027;7028	243;718;719;1041;1042;1043;1273;2282;3581;3912;4802;4803;4820;4951;4952;5074;5075;5076;5134;5135;5174;5175;5188;5189;5190;5636;7448;7514;7515;7516;7517;7518;7962;7963;7964;8105;8182;8183;8947;8948;9140;9158;9159;9160;9311;9312;9336;9337;9535;10518;10532;10533;10534;10642;10643;10644;10645;10646	257;748;749;1095;1096;1097;1339;2476;3874;4262;5246;5247;5265;5396;5397;5530;5531;5532;5592;5593;5594;5635;5636;5649;5650;5651;6138;8098;8164;8165;8166;8167;8168;8639;8640;8641;8786;8863;8864;9677;9678;9916;9935;9936;9937;10092;10093;10117;10118;10339;11381;11395;11396;11397;11514;11515;11516;11517;11518	257;749;1095;1097;1339;2476;3874;4262;5247;5265;5396;5530;5592;5635;5650;5651;6138;8098;8165;8639;8640;8786;8863;8864;9677;9678;9916;9936;10092;10118;10339;11381;11397;11514	293;294;295	109;188;387
Q9UKR5;REV__A6NIV6	Q9UKR5	6;1	6;1	6;1	Probable ergosterol biosynthetic protein 28	C14orf1	sp|Q9UKR5|ERG28_HUMAN Probable ergosterol biosynthetic protein 28 OS=Homo sapiens OX=9606 GN=ERG28 PE=1 SV=1	2	6	6	6	40	40	40	15864	140	140;560	0	52908	8077100000	1009600000	8				1111	667;874;1863;4609;5560;6692	True;True;True;True;True;True	718;934;1990;4948;5947;7151	1080;1397;1398;2960;7553;9070;9071;10800	1134;1473;1474;3174;8203;9830;9831;11674	1134;1474;3174;8203;9830;11674
O14744;O14744-2;O14744-5;O14744-3;O14744-4;G3V580;H0YJX6;G3V5L5;G3V2X6;G3V2L6;C9JSX3;H0YJ77;H7BZ44;H0YJD3;G3V5T6;G3V2F5;G3V507;H0YJY6	O14744;O14744-2;O14744-5;O14744-3;O14744-4	30;28;27;25;17;14;14;12;11;10;10;5;4;4;3;2;2;1	30;28;27;25;17;14;14;12;11;10;10;5;4;4;3;2;2;1	30;28;27;25;17;14;14;12;11;10;10;5;4;4;3;2;2;1	Protein arginine N-methyltransferase 5;Protein arginine N-methyltransferase 5, N-terminally processed	PRMT5	sp|O14744|ANM5_HUMAN Protein arginine N-methyltransferase 5 OS=Homo sapiens OX=9606 GN=PRMT5 PE=1 SV=4;sp|O14744-2|ANM5_HUMAN Isoform 2 of Protein arginine N-methyltransferase 5 OS=Homo sapiens OX=9606 GN=PRMT5;sp|O14744-5|ANM5_HUMAN Isoform 5 of Protein a	18	30	30	30	65.6	65.6	65.6	72683	637	637;620;593;576;466;180;279;169;185;183;186;138;179;177;104;86;42;61	0	323.31	41824000000	995800000	56				431	40;41;55;117;675;783;785;937;1003;1043;1077;1123;1277;1285;1321;2268;2392;2635;3324;3833;4436;4759;4963;5064;5656;5859;6192;6265;6266;6449	True;True;True;True;True;True;True;True;True;True;True;True;True;True;True;True;True;True;True;True;True;True;True;True;True;True;True;True;True;True	44;45;59;60;127;726;840;842;1001;1073;1114;1115;1150;1151;1200;1368;1377;1413;2421;2555;2809;3530;4057;4766;4767;5101;5311;5421;6046;6263;6613;6691;6692;6889	99;100;115;116;117;208;209;1089;1090;1252;1255;1256;1508;1509;1644;1691;1692;1693;1694;1735;1736;1737;1738;1739;1740;1799;2059;2060;2071;2236;3639;3998;3999;4466;4467;5463;5464;6203;6204;7292;7293;7294;7738;7739;8065;8206;9220;9530;9999;10117;10118;10119;10460;10461	104;105;120;121;122;218;219;1143;1144;1316;1319;1320;1586;1587;1747;1797;1798;1799;1800;1842;1843;1844;1845;1846;1847;1848;1849;1909;2197;2198;2209;2430;3937;4353;4354;4888;4889;4890;5948;5949;6730;6731;7920;7921;7922;8391;8392;8393;8745;8888;10001;10334;10828;10952;10953;10954;11320;11321	104;105;122;219;1144;1316;1320;1587;1747;1800;1842;1909;2197;2209;2430;3937;4354;4889;5949;6730;7921;8393;8745;8888;10001;10334;10828;10952;10954;11321	145;146;147;148;149	4;107;362;500;529
J9JIE6;Q9UM00;J3KS45;Q9UM00-2;J3QQY2;J3KTQ7	J9JIE6;Q9UM00;J3KS45;Q9UM00-2	5;5;4;4;2;2	5;5;4;4;2;2	5;5;4;4;2;2	Transmembrane and coiled-coil domain-containing protein 1	TMCO1	tr|J9JIE6|J9JIE6_HUMAN Calcium load-activated calcium channel OS=Homo sapiens OX=9606 GN=TMCO1 PE=1 SV=1;sp|Q9UM00|TMCO1_HUMAN Calcium load-activated calcium channel OS=Homo sapiens OX=9606 GN=TMCO1 PE=1 SV=1;tr|J3KS45|J3KS45_HUMAN Calcium load-activated c	6	5	5	5	2020-03-16	2020-03-16	2020-03-16	27079	239	239;188;143;169;104;152	0	39083	11895000000	991250000	8				384	945;1591;2800;3068;3707	True;True;True;True;True	1009;1701;2977;3263;3928	1517;2614;4697;5111;6047;6048	1595;2824;2825;5137;5568;6572;6573;6574	1595;2824;5137;5568;6573
P07900;P07900-2;G3V2J8;Q58FF6;Q58FG0;Q14568;Q58FG1;Q92538-3;Q92538-2;Q92538	P07900;P07900-2	33;33;7;5;4;4;1;1;1;1	33;33;7;5;4;4;1;1;1;1	23;23;4;0;2;2;0;0;0;0	Heat shock protein HSP 90-alpha	HSP90AA1	sp|P07900|HS90A_HUMAN Heat shock protein HSP 90-alpha OS=Homo sapiens OX=9606 GN=HSP90AA1 PE=1 SV=5;sp|P07900-2|HS90A_HUMAN Isoform 2 of Heat shock protein HSP 90-alpha OS=Homo sapiens OX=9606 GN=HSP90AA1	10	33	33	23	53.7	53.7	41.4	84659	732	732;854;174;505;334;343;418;1855;1856;1859	0	323.31	46117000000	960770000	60				541	121;334;414;669;981;1039;1217;1313;1314;1416;1419;1554;1642;1994;2384;2436;2450;2481;2488;2559;2935;3392;3393;3398;3805;3959;4406;5253;5529;5998;6434;6606;6816	True;True;True;True;True;True;True;True;True;True;True;True;True;True;True;True;True;True;True;True;True;True;True;True;True;True;True;True;True;True;True;True;True	133;361;449;720;1049;1050;1110;1302;1405;1406;1511;1514;1663;1758;2132;2546;2600;2615;2616;2647;2654;2729;3123;3602;3603;3608;4028;4189;4190;4734;5619;5912;6407;6408;6874;7056;7283;7284	221;539;689;1082;1083;1615;1616;1687;1916;2225;2226;2227;2360;2361;2364;2563;2564;2680;3175;3987;3988;4055;4056;4057;4076;4077;4078;4125;4126;4134;4135;4276;4277;4872;4873;5579;5580;5581;5582;5583;5590;6171;6385;6386;6387;6388;7251;8556;8557;8970;9701;9702;9703;9704;10441;10682;10991;10992	235;559;719;1136;1137;1717;1718;1793;2030;2418;2419;2420;2556;2557;2560;2765;2766;2891;3397;4342;4343;4411;4412;4413;4432;4433;4434;4482;4483;4491;4492;4661;4662;5317;5318;6079;6080;6081;6082;6083;6090;6091;6698;6923;6924;6925;6926;7878;9266;9267;9705;9706;10510;10511;10512;10513;11301;11554;11873;11874	235;559;719;1136;1718;1793;2030;2418;2420;2557;2560;2766;2891;3397;4343;4413;4434;4483;4492;4662;5317;6079;6081;6091;6698;6925;7878;9267;9705;10510;11301;11554;11874	214;215;216;217;218;219	180;371;474;521;610;628
O96005-4;O96005;O96005-3;K7EJ16;K7EQQ1;K7ERL5	O96005-4;O96005;O96005-3	16;16;15;4;3;3	16;16;15;4;3;3	16;16;15;4;3;3	Cleft lip and palate transmembrane protein 1	CLPTM1	sp|O96005-4|CLPT1_HUMAN Isoform 3 of Cleft lip and palate transmembrane protein 1 OS=Homo sapiens OX=9606 GN=CLPTM1;sp|O96005|CLPT1_HUMAN Cleft lip and palate transmembrane protein 1 OS=Homo sapiens OX=9606 GN=CLPTM1 PE=1 SV=1;sp|O96005-3|CLPT1_HUMAN Isofo	6	16	16	16	2020-05-30	2020-05-30	2020-05-30	75177	655	655;669;567;152;171;209	0	206.3	33127000000	946470000	19				511	349;1236;1237;2256;3221;4160;4249;4363;4639;4882;5316;5407;5410;5892;6228;6315	True;True;True;True;True;True;True;True;True;True;True;True;True;True;True;True	376;1323;1324;2409;3424;4455;4564;4684;4979;5227;5687;5784;5787;6298;6652;6653;6746	558;1941;1942;3625;5322;6829;6968;7193;7591;7944;8632;8633;8762;8766;9571;10069;10070;10233	578;2057;2058;3923;5788;7415;7561;7817;8242;8620;9342;9343;9344;9480;9484;10377;10903;10904;11073	578;2057;2058;3923;5788;7415;7561;7817;8242;8620;9343;9480;9484;10377;10903;11073	190;191	179;586
A6NLH6;Q9P003	A6NLH6;Q9P003	1;1	1;1	1;1	Protein cornichon homolog 4	CNIH4	tr|A6NLH6|A6NLH6_HUMAN Protein cornichon homolog 4 OS=Homo sapiens OX=9606 GN=CNIH4 PE=1 SV=1;sp|Q9P003|CNIH4_HUMAN Protein cornichon homolog 4 OS=Homo sapiens OX=9606 GN=CNIH4 PE=1 SV=1	2	1	1	1	2020-06-14	2020-06-14	2020-06-14	15771	137	137;139	0.0011161	10405	3634000000	908500000	6				124	6665	True	7122;7123;7124	10763;10764;10765;10766;10767;10768	11637;11638;11639;11640;11641;11642	11641	46;47	87;93
P10620;F5H760;F5H7F6;F5H6X2;P10620-2;F5GX73;F5H613	P10620;F5H760	5;3;2;2;2;1;1	5;3;2;2;2;1;1	5;3;2;2;2;1;1	Microsomal glutathione S-transferase 1	MGST1	sp|P10620|MGST1_HUMAN Microsomal glutathione S-transferase 1 OS=Homo sapiens OX=9606 GN=MGST1 PE=1 SV=1;tr|F5H760|F5H760_HUMAN Microsomal glutathione S-transferase 1 (Fragment) OS=Homo sapiens OX=9606 GN=MGST1 PE=1 SV=1	7	5	5	5	52.3	52.3	52.3	17598	155	155;106;77;80;87;42;46	0	77336	6354600000	907800000	8				546	246;3030;3353;4137;5989	True;True;True;True;True	267;3222;3561;4416;4417;4418;6398	378;5009;5010;5527;6698;6699;6700;6701;9692	392;5454;5455;6026;7273;7274;7275;7276;10501	392;5455;6026;7275;10501	232;233;234	27;28;30
P51571;A6NLM8	P51571;A6NLM8	5;3	5;3	5;3	Translocon-associated protein subunit delta	SSR4	sp|P51571|SSRD_HUMAN Translocon-associated protein subunit delta OS=Homo sapiens OX=9606 GN=SSR4 PE=1 SV=1;tr|A6NLM8|A6NLM8_HUMAN Translocon-associated protein subunit delta OS=Homo sapiens OX=9606 GN=SSR4 PE=1 SV=1	2	5	5	5	36.4	36.4	36.4	18998	173	173;148	0	57845	8894800000	889480000	12				664	1758;4391;5016;6297;6764	True;True;True;True;True	1881;4719;5368;6725;6726;7228	2832;7234;7235;8142;8143;8144;10166;10167;10168;10169;10898;10899	3044;7858;7859;7860;7861;8823;8824;8825;11002;11003;11004;11005;11775;11776	3044;7859;8824;11002;11775	335	64
O75396;A0A087X1A9	O75396	10;2	10;2	10;2	Vesicle-trafficking protein SEC22b	SEC22B	sp|O75396|SC22B_HUMAN Vesicle-trafficking protein SEC22b OS=Homo sapiens OX=9606 GN=SEC22B PE=1 SV=4	2	10	10	10	47	47	47	24593	215	215;79	0	103.41	12609000000	840610000	16				479	943;2063;2858;2859;3668;4209;4349;5884;6161;6279	True;True;True;True;True;True;True;True;True;True	1007;2204;3042;3043;3044;3889;4515;4669;6289;6290;6580;6581;6707	1515;3266;4778;4779;4780;5998;6900;7177;9560;9561;9562;9956;9957;10145;10146	1593;3490;5221;5222;5223;5224;6522;7486;7801;10366;10367;10368;10783;10784;10981;10982	1593;3490;5221;5224;6522;7486;7801;10367;10784;10982	177;178;179	6;20;149
P68371	P68371	19	19	1	Tubulin beta-4B chain	TUBB4B	sp|P68371|TBB4B_HUMAN Tubulin beta-4B chain OS=Homo sapiens OX=9606 GN=TUBB4B PE=1 SV=1	1	19	19	1	50.1	50.1	2020-07-02	49.83	445	445	0	303.22	17913000000	814230000	39				721	366;579;1380;1615;1902;1903;1986;2153;2154;2852;2870;2931;2941;3225;3431;4384;4448;5502;6713	True;True;True;True;True;True;True;True;True;True;True;True;True;True;True;True;True;True;True	395;396;624;625;1474;1727;1728;2035;2036;2124;2298;2299;3033;3034;3055;3119;3129;3428;3429;3642;3643;4708;4709;4710;4780;5885;7172	580;581;582;968;969;970;2315;2316;2644;2645;3024;3025;3166;3418;3419;3420;4769;4770;4793;4865;4885;5326;5327;5328;5633;5634;5635;7221;7222;7223;7224;7336;7337;8929;8930;10821;10822;10823	600;601;602;1020;1021;1022;2509;2510;2855;2856;3240;3241;3388;3677;3678;3679;3680;5212;5213;5237;5310;5330;5792;5793;5794;6135;6136;6137;7845;7846;7847;7848;7978;7979;9657;9658;9659;11696;11697;11698	602;1021;2510;2856;3240;3241;3388;3679;3680;5213;5237;5310;5330;5793;6137;7847;7978;9658;11697	18;19;20;21;22;211;212;382	73;164;257;267;293;299;300;330
A0A3B3IUB5;Q8TCT9-5;Q8TCT9;A0A0S2Z6F0;A0A075B6F6;A0A3B3IT72;A0A087WVH6;A0A0C4DGU3	A0A3B3IUB5;Q8TCT9-5;Q8TCT9;A0A0S2Z6F0;A0A075B6F6;A0A3B3IT72	11;11;11;9;8;8;1;1	11;11;11;9;8;8;1;1	1;1;1;0;0;0;0;0	Minor histocompatibility antigen H13	HM13	tr|A0A3B3IUB5|A0A3B3IUB5_HUMAN Minor histocompatibility antigen H13 OS=Homo sapiens OX=9606 GN=HM13 PE=1 SV=1;sp|Q8TCT9-5|HM13_HUMAN Isoform 5 of Minor histocompatibility antigen H13 OS=Homo sapiens OX=9606 GN=HM13;sp|Q8TCT9|HM13_HUMAN Minor histocompatibi	8	11	11	1	2020-07-30	2020-07-30	2020-06-03	46313	420	420;335;377;345;272;365;50;143	0	162.32	16154000000	807680000	18				110	949;989;1254;1720;1768;2088;2409;3914;4236;4946;4947	True;True;True;True;True;True;True;True;True;True;True	1013;1059;1342;1839;1892;2230;2231;2572;4143;4547;4548;5293;5294	1560;1626;1964;2781;2847;3324;3325;3326;4020;4021;4022;6328;6949;6950;8039;8040;8041	1657;1728;2084;2993;3059;3568;3569;3570;4375;4376;4377;6865;6866;7542;7543;8719;8720;8721	1657;1728;2084;2993;3059;3570;4376;6865;7543;8719;8721	42;43	66;386
CON__P15636	CON__P15636	7	7	7				1	7	7	7	2020-01-19	2020-01-19	2020-01-19	68124	653	653	0	248.47	20904000000	720810000	20			+	201	420;547;1034;4959;5140;6011;6144	True;True;True;True;True;True;True	455;456;589;1105;5306;5505;6423;6563	696;697;698;888;1679;1680;1681;1682;8057;8058;8059;8317;8318;9722;9723;9902;9903	726;727;728;926;1782;1783;1784;1785;1786;1787;1788;8737;8738;8739;9001;9002;10531;10532;10714;10715	727;926;1786;8739;9001;10532;10715	84	301
Q96A33;Q96A33-2;A0A087WYW6;J3QR89	Q96A33;Q96A33-2	19;18;9;3	19;18;9;3	19;18;9;3	Coiled-coil domain-containing protein 47	CCDC47	sp|Q96A33|CCD47_HUMAN Coiled-coil domain-containing protein 47 OS=Homo sapiens OX=9606 GN=CCDC47 PE=1 SV=1;sp|Q96A33-2|CCD47_HUMAN Isoform 2 of Coiled-coil domain-containing protein 47 OS=Homo sapiens OX=9606 GN=CCDC47	4	19	19	19	45.1	45.1	45.1	55873	483	483;480;190;54	0	299.01	16456000000	715490000	46				949	467;960;1420;1470;1471;2682;2851;2854;3201;3686;4140;4204;4655;4984;5677;5923;5961;6367;6638	True;True;True;True;True;True;True;True;True;True;True;True;True;True;True;True;True;True;True	504;1026;1027;1515;1575;1576;1577;2857;3032;3037;3038;3402;3907;4426;4427;4509;4510;4995;5335;6067;6329;6330;6370;6798;6799;7089;7090	781;1587;1588;1589;1590;1591;2365;2463;2464;2465;4529;4530;4768;4773;4774;5297;5298;6019;6020;6752;6753;6754;6755;6886;6887;6888;6889;6890;6891;6892;6893;6894;7608;8101;9241;9611;9612;9654;10313;10314;10315;10316;10723;10724;10725	817;1688;1689;1690;1691;1692;1693;2561;2663;2664;2665;4955;4956;5211;5216;5217;5763;5764;6544;6545;7329;7330;7331;7332;7472;7473;7474;7475;7476;7477;7478;7479;7480;8259;8782;10022;10418;10419;10461;11161;11162;11163;11164;11595;11596;11597	817;1691;2561;2663;2665;4955;5211;5216;5763;6545;7332;7475;8259;8782;10022;10419;10461;11162;11596	468;469;470;471;472;473;474;475;476;477;478;479;480	218;237;238;251;256;276;313;317;343;376;383;385;445
Q8N5K1;D6RCF4;A0A2R8Y540;I3L1N9	Q8N5K1;D6RCF4	7;4;3;3	7;4;3;3	7;4;3;3	CDGSH iron-sulfur domain-containing protein 2	CISD2	sp|Q8N5K1|CISD2_HUMAN CDGSH iron-sulfur domain-containing protein 2 OS=Homo sapiens OX=9606 GN=CISD2 PE=1 SV=1;tr|D6RCF4|D6RCF4_HUMAN CDGSH iron-sulfur domain-containing protein 2 OS=Homo sapiens OX=9606 GN=CISD2 PE=1 SV=1	4	7	7	7	54.8	54.8	54.8	15278	135	135;145;40;47	0	83801	7823800000	711250000	9				879	1062;2522;3734;5569;6138;6296;6411	True;True;True;True;True;True;True	1134;2690;3956;5956;6557;6724;6845	1716;4230;4231;6084;9104;9105;9894;10165;10369	1822;4614;4615;6610;9878;9879;10705;11001;11219	1822;4614;6610;9879;10705;11001;11219
A0A087WUD3;Q9NRP0;Q9NRP0-2	A0A087WUD3;Q9NRP0;Q9NRP0-2	2;2;2	2;2;2	2;2;2	Oligosaccharyltransferase complex subunit OSTC	OSTC	tr|A0A087WUD3|A0A087WUD3_HUMAN Oligosaccharyltransferase complex subunit OSTC OS=Homo sapiens OX=9606 GN=OSTC PE=1 SV=1;sp|Q9NRP0|OSTC_HUMAN Oligosaccharyltransferase complex subunit OSTC OS=Homo sapiens OX=9606 GN=OSTC PE=1 SV=1;sp|Q9NRP0-2|OSTC_HUMAN Iso	3	2	2	2	2020-07-21	2020-07-21	2020-07-21	9369	83	83;149;171	0	15839	2834800000	708710000	2				12	4071;6253	True;True	4330;6679	6583;10104	7138;10938	7138;10938
H3BMW4;Q9BTX3;J3KRY7;Q9BTX3-2	H3BMW4;Q9BTX3;J3KRY7;Q9BTX3-2	2;2;1;1	2;2;1;1	2;2;1;1	Transmembrane protein 208	TMEM208	tr|H3BMW4|H3BMW4_HUMAN Transmembrane protein 208 OS=Homo sapiens OX=9606 GN=TMEM208 PE=1 SV=1;sp|Q9BTX3|TM208_HUMAN Transmembrane protein 208 OS=Homo sapiens OX=9606 GN=TMEM208 PE=1 SV=1;tr|J3KRY7|J3KRY7_HUMAN HSPC171 protein, isoform CRA_a OS=Homo sapiens	4	2	2	2	2020-01-27	2020-01-27	2020-01-27	15522	140	140;173;103;100	0	60427	1339600000	669790000	6				343	32;4778	True;True	35;36;5121	87;88;89;90;7762;7763	91;92;93;94;8416;8417	94;8417	116	98
Q9BTV4;V9GY05	Q9BTV4	19;2	19;2	19;2	Transmembrane protein 43	TMEM43	sp|Q9BTV4|TMM43_HUMAN Transmembrane protein 43 OS=Homo sapiens OX=9606 GN=TMEM43 PE=1 SV=1	2	19	19	19	57.2	57.2	57.2	44875	400	400;133	0	323.31	18610000000	664650000	32				1006	60;951;1676;1767;2044;2057;2578;2579;3287;3616;3918;4420;4970;5123;5501;5780;6317;6739;6786	True;True;True;True;True;True;True;True;True;True;True;True;True;True;True;True;True;True;True	66;1015;1794;1891;2184;2198;2749;2750;3491;3831;4147;4748;4749;5320;5487;5884;6178;6748;7202;7251	124;1562;2722;2846;3234;3256;4306;4307;4308;4309;5397;5925;5926;6332;6333;6334;7270;7271;7272;8082;8083;8286;8287;8288;8926;8927;8928;9384;10235;10236;10855;10928	129;1659;2933;3058;3456;3480;4692;4693;4694;4695;5863;6449;6450;6870;6871;6872;7898;7899;7900;8763;8764;8968;8969;8970;9654;9655;9656;10175;11075;11076;11730;11806	129;1659;2933;3058;3456;3480;4692;4694;5863;6450;6871;7899;8764;8970;9655;10175;11076;11730;11806	499	173
Q9P0L0;Q9P0L0-2;J3QKM9	Q9P0L0;Q9P0L0-2	12;11;2	12;11;2	11;10;2	Vesicle-associated membrane protein-associated protein A	VAPA	sp|Q9P0L0|VAPA_HUMAN Vesicle-associated membrane protein-associated protein A OS=Homo sapiens OX=9606 GN=VAPA PE=1 SV=3;sp|Q9P0L0-2|VAPA_HUMAN Isoform 2 of Vesicle-associated membrane protein-associated protein A OS=Homo sapiens OX=9606 GN=VAPA	3	12	12	11	49.4	49.4	44.6	27893	249	249;294;29	0	112.46	13290000000	664510000	25				1093	468;720;1170;1886;2262;2427;2505;3647;3666;4542;4552;4553	True;True;True;True;True;True;True;True;True;True;True;True	505;774;775;1251;1252;2018;2019;2415;2591;2672;3865;3885;3886;4877;4888;4889	782;1156;1157;1856;1857;1858;2994;2995;2996;2997;2998;3633;4042;4043;4206;5969;5970;5994;5995;7467;7479;7480;7481;7482	818;1213;1214;1967;1968;1969;1970;3208;3209;3210;3211;3212;3931;4397;4398;4588;6493;6494;6518;6519;8117;8129;8130;8131;8132	818;1214;1970;3209;3931;4397;4588;6494;6518;8117;8130;8132	553;554;555;556;557	96;109;122;132;142
O15260;Q5T8U5;O15260-2;B7Z1G8;O15260-3	O15260;Q5T8U5;O15260-2;B7Z1G8;O15260-3	7;6;6;4;4	7;6;6;4;4	7;6;6;4;4	Surfeit locus protein 4	SURF4	sp|O15260|SURF4_HUMAN Surfeit locus protein 4 OS=Homo sapiens OX=9606 GN=SURF4 PE=1 SV=3;tr|Q5T8U5|Q5T8U5_HUMAN Surfeit 4 OS=Homo sapiens OX=9606 GN=SURF4 PE=1 SV=1;sp|O15260-2|SURF4_HUMAN Isoform 2 of Surfeit locus protein 4 OS=Homo sapiens OX=9606 GN=SUR	5	7	7	7	2020-01-30	2020-01-30	2020-01-30	30394	269	269;186;159;226;128	0	112.34	7953900000	662830000	19				442	2286;3234;4222;4334;4602;4942;5263	True;True;True;True;True;True;True	2440;2441;2442;3438;4533;4653;4941;5289;5630	3740;3741;3742;3743;3744;3745;5337;6933;7153;7154;7155;7156;7546;8026;8027;8028;8569	4061;4062;4063;4064;4065;4066;4067;5803;7526;7776;7777;7778;7779;7780;8196;8705;8706;8707;9279	4067;5803;7526;7776;8196;8706;9279	157;158;159;160	7;44;148;231
P68363;F5H5D3;Q9BQE3;P68363-2;P68366;P68366-2;A0A1W2PQM2;F8VVB9;Q9NY65-2;Q9NY65;C9J2C0;F8VS66;F8VRZ4;F8VWV9;C9JDS9;F8VX09;C9JQ00;C9JEV8;C9JDL2;V9GZ17;C9JJQ8;C9K0S6;A6NHL2-2;F8VRK0;A6NHL2;F8W0F6;Q9H853;F8VXZ7	P68363;F5H5D3;Q9BQE3;P68363-2;P68366;P68366-2	19;16;16;16;14;14;9;9;8;8;8;6;6;5;4;4;3;3;3;3;3;2;2;2;2;1;1;1	19;16;16;16;14;14;9;9;8;8;8;6;6;5;4;4;3;3;3;3;3;2;2;2;2;1;1;1	2;1;1;2;2;2;0;1;1;1;1;0;0;0;1;0;0;0;0;0;0;0;0;0;0;0;1;0	Tubulin alpha-1B chain;Tubulin alpha-1C chain;Tubulin alpha-4A chain	TUBA1B;TUBA1C;TUBA4A	sp|P68363|TBA1B_HUMAN Tubulin alpha-1B chain OS=Homo sapiens OX=9606 GN=TUBA1B PE=1 SV=1;tr|F5H5D3|F5H5D3_HUMAN Tubulin alpha chain OS=Homo sapiens OX=9606 GN=TUBA1C PE=1 SV=1;sp|Q9BQE3|TBA1C_HUMAN Tubulin alpha-1C chain OS=Homo sapiens OX=9606 GN=TUBA1C P	28	19	19	2	60.3	60.3	6	50151	451	451;519;449;335;448;433;325;246;383;449;467;130;112;81;156;75;180;153;119;275;198;47;406;49;446;231;241;26	0	282.58	15802000000	658420000	32				720	193;194;556;567;616;1108;1199;1216;1364;1716;1723;2155;2724;3161;3492;4811;5169;5628;6028	True;True;True;True;True;True;True;True;True;True;True;True;True;True;True;True;True;True;True	210;211;598;599;611;664;665;1184;1284;1301;1457;1835;1842;1843;2300;2899;3362;3704;5155;5535;6018;6441	306;307;308;898;899;900;901;950;951;1012;1013;1780;1894;1915;2293;2776;2777;2784;2785;3421;4575;4576;5242;5709;5710;5711;7830;7831;8356;9189;9746	320;321;322;936;937;938;939;1002;1003;1065;1066;1890;2008;2029;2487;2988;2989;2996;2997;3681;5001;5002;5703;6212;6213;6214;8490;8491;9043;9044;9970;10555	320;321;937;1002;1066;1890;2008;2029;2487;2988;2996;3681;5002;5703;6212;8491;9044;9970;10555	378;379;380;381	302;377;398;413
P11142;E9PKE3;E9PNE6;P11142-2;A8K7Q2;E9PN89;E9PLF4;E9PQQ4;E9PQK7;E9PK54;E9PS65;P54652;E9PN25;E9PPY6;E9PM13;E9PI65	P11142;E9PKE3;E9PNE6;P11142-2;A8K7Q2;E9PN89	29;28;22;22;17;15;11;10;10;10;9;9;8;8;7;6	26;25;19;21;15;15;10;9;9;9;7;7;7;7;5;5	24;23;18;19;14;13;9;9;9;9;7;5;7;7;5;4	Heat shock cognate 71 kDa protein	HSPA8	sp|P11142|HSP7C_HUMAN Heat shock cognate 71 kDa protein OS=Homo sapiens OX=9606 GN=HSPA8 PE=1 SV=1;tr|E9PKE3|E9PKE3_HUMAN Heat shock cognate 71 kDa protein OS=Homo sapiens OX=9606 GN=HSPA8 PE=1 SV=1;tr|E9PNE6|E9PNE6_HUMAN Heat shock cognate 71 kDa protein	16	29	26	24	58	53.9	50	70897	646	646;627;500;493;410;312;187;171;178;183;223;639;132;137;150;168	0	323.31	26262000000	640530000	55				550	466;688;748;976;1242;1712;1738;2257;2333;2373;2595;2765;2974;3597;4212;4214;4432;4441;4895;4966;5101;5121;5166;5322;5378;5805;5854;5926;6303	True;True;True;True;True;True;True;True;True;True;True;True;False;True;True;False;True;True;True;True;True;True;True;True;True;False;True;True;True	503;740;804;1044;1329;1830;1831;1859;2410;2490;2534;2766;2767;2940;3162;3810;4519;4520;4522;4523;4761;4762;4772;4773;5240;5315;5316;5463;5484;5485;5532;5693;5752;6207;6257;6334;6732	780;1106;1204;1205;1610;1949;1950;2771;2772;2807;3626;3627;3906;3957;3958;3959;3960;3961;3962;4326;4327;4328;4639;4640;4929;5899;6905;6906;6907;6908;6910;6911;6912;6913;6914;6915;6916;6917;6918;6919;6920;6921;7287;7288;7328;7329;7961;8074;8075;8076;8077;8256;8257;8258;8259;8283;8284;8352;8353;8640;8641;8723;8724;9444;9523;9524;9617;10175	816;1160;1161;1266;1267;1712;2065;2066;2067;2068;2069;2070;2983;2984;3019;3924;3925;4256;4309;4310;4311;4312;4313;4314;4712;4713;4714;5077;5078;5374;6423;7492;7493;7494;7495;7497;7498;7499;7500;7501;7502;7503;7504;7505;7506;7507;7508;7509;7510;7511;7512;7513;7514;7915;7916;7970;7971;8638;8755;8756;8757;8758;8938;8939;8940;8941;8965;8966;9039;9040;9351;9352;9441;9442;10242;10327;10328;10424;11011	816;1161;1266;1712;2069;2984;3019;3924;4256;4309;4713;5077;5374;6423;7492;7497;7916;7970;8638;8757;8940;8966;9039;9352;9442;10242;10327;10424;11011	28;239;240;241;242;243;244	61;87;93;122;237;518;549
P00167-2;P00167;P00167-3;J3KNC7	P00167-2;P00167;P00167-3	5;5;4;1	5;5;4;1	5;5;4;1	Cytochrome b5	CYB5A	sp|P00167-2|CYB5_HUMAN Isoform 2 of Cytochrome b5 OS=Homo sapiens OX=9606 GN=CYB5A;sp|P00167|CYB5_HUMAN Cytochrome b5 OS=Homo sapiens OX=9606 GN=CYB5A PE=1 SV=2;sp|P00167-3|CYB5_HUMAN Isoform 3 of Cytochrome b5 OS=Homo sapiens OX=9606 GN=CYB5A	4	5	5	5	67.3	67.3	67.3	11268	98	98;134;124;60	0	76038	5059000000	632370000	8				513	1520;1837;5406;5564;6815	True;True;True;True;True	1628;1964;5783;5951;7282	2519;2520;2929;2930;8760;8761;9099;10990	2720;2721;3143;3144;9478;9479;9873;11872	2721;3143;9478;9873;11872
P67812;H0YNG3;P67812-4;P67812-3;P67812-2;H0YKT4;H0YNX5;H0YNA5;P0C7V7	P67812;H0YNG3;P67812-4;P67812-3;P67812-2;H0YKT4	7;6;6;6;5;4;3;3;1	7;6;6;6;5;4;3;3;1	7;6;6;6;5;4;3;3;1	Signal peptidase complex catalytic subunit SEC11A;Signal peptidase complex catalytic subunit SEC11	SEC11A	sp|P67812|SC11A_HUMAN Signal peptidase complex catalytic subunit SEC11A OS=Homo sapiens OX=9606 GN=SEC11A PE=1 SV=1;tr|H0YNG3|H0YNG3_HUMAN Signal peptidase complex catalytic subunit SEC11 OS=Homo sapiens OX=9606 GN=SEC11A PE=1 SV=1;sp|P67812-4|SC11A_HUMAN	9	7	7	7	43.6	43.6	43.6	20625	179	179;163;164;185;153;129;106;135;166	0	75272	8175400000	628880000	17				717	2116;2216;4130;4131;4765;5960;6022	True;True;True;True;True;True;True	2259;2260;2365;2366;4405;4406;4407;4408;4409;5107;6369;6434	3355;3356;3357;3545;3546;3547;6685;6686;6687;6688;6689;6690;6691;7745;7746;9653;9735	3599;3600;3601;3825;3826;3827;7260;7261;7262;7263;7264;7265;7266;8399;8400;10460;10544	3600;3827;7260;7266;8400;10460;10544	374;375;376;377	1;40;57;156
E9PL01;A0A087WUC6;E9PI68;Q15005;E9PRB9;H0YE04	E9PL01;A0A087WUC6;E9PI68;Q15005;E9PRB9	7;7;7;7;5;1	7;7;7;7;5;1	7;7;7;7;5;1	Signal peptidase complex subunit 2	SPCS2	tr|E9PL01|E9PL01_HUMAN Signal peptidase complex subunit 2 OS=Homo sapiens OX=9606 GN=SPCS2 PE=1 SV=1;tr|A0A087WUC6|A0A087WUC6_HUMAN Signal peptidase complex subunit 2 OS=Homo sapiens OX=9606 GN=SPCS2 PE=1 SV=1;tr|E9PI68|E9PI68_HUMAN Signal peptidase comple	6	7	7	7	45.2	45.2	45.2	17027	157	157;227;257;226;87;166	0	127.22	6912900000	628450000	16				11	3;1016;1759;3047;3429;3867;5158	True;True;True;True;True;True;True	3;1086;1087;1882;1883;3241;3640;4094;5523	3;1658;1659;2833;2834;2835;2836;2837;5084;5628;5629;5630;5631;6260;8339;8340	3;1761;1762;3045;3046;3047;3048;3049;5541;6129;6130;6131;6132;6133;6795;9023;9024	3;1761;3048;5541;6129;6795;9024	5;6	82;136
J3KNF8;O43169;H3BUX2;D6RFH4;J3QR91	J3KNF8;O43169;H3BUX2;D6RFH4	7;6;5;4;2	7;6;5;4;2	7;6;5;4;2	Cytochrome b5 type B	CYB5B	tr|J3KNF8|J3KNF8_HUMAN Cytochrome b5 type B (Outer mitochondrial membrane), isoform CRA_a OS=Homo sapiens OX=9606 GN=CYB5B PE=1 SV=1;sp|O43169|CYB5B_HUMAN Cytochrome b5 type B OS=Homo sapiens OX=9606 GN=CYB5B PE=1 SV=2;tr|H3BUX2|H3BUX2_HUMAN Cytochrome b5	5	7	7	7	66.7	66.7	66.7	16694	150	150;146;140;131;64	0	110.98	6236300000	623630000	12				372	1859;2282;3294;4950;5136;6452;6817	True;True;True;True;True;True;True	1986;2436;3499;5297;5500;5501;6892;7285	2954;2955;2956;3736;5410;8045;8046;8047;8306;8307;10464;10993	3168;3169;3170;4057;5876;8725;8726;8727;8988;8989;11324;11875	3169;4057;5876;8726;8988;11324;11875	127	5
Q15363;F5GX39;E7EQ72	Q15363;F5GX39;E7EQ72	7;6;6	7;6;6	7;6;6	Transmembrane emp24 domain-containing protein 2	TMED2	sp|Q15363|TMED2_HUMAN Transmembrane emp24 domain-containing protein 2 OS=Homo sapiens OX=9606 GN=TMED2 PE=1 SV=1;tr|F5GX39|F5GX39_HUMAN Transmembrane emp24 domain-containing protein 2 OS=Homo sapiens OX=9606 GN=TMED2 PE=1 SV=1;tr|E7EQ72|E7EQ72_HUMAN Transm	3	7	7	7	37.3	37.3	37.3	22761	201	201;116;166	0	71202	7865700000	605050000	18				773	1705;2280;2426;3007;3290;4184;6791	True;True;True;True;True;True;True	1823;2434;2589;2590;3196;3197;3494;3495;4485;7256	2763;3733;3734;4040;4041;4977;4978;4979;5401;5402;5403;5404;5405;5406;6861;10933;10934;10935	2974;4054;4055;4395;4396;5422;5423;5424;5867;5868;5869;5870;5871;5872;7447;11811;11812;11813	2974;4054;4396;5422;5871;7447;11811	407;408;409;410	107;133;141;151
Q9UBM7;E9PM00;E9PJ54;E9PRL8;E9PQ71;E9PIP9;H0YE57;E9PLZ2	Q9UBM7;E9PM00	7;4;3;2;2;2;2;1	7;4;3;2;2;2;2;1	7;4;3;2;2;2;2;1	7-dehydrocholesterol reductase	DHCR7	sp|Q9UBM7|DHCR7_HUMAN 7-dehydrocholesterol reductase OS=Homo sapiens OX=9606 GN=DHCR7 PE=1 SV=1;tr|E9PM00|E9PM00_HUMAN 7-dehydrocholesterol reductase (Fragment) OS=Homo sapiens OX=9606 GN=DHCR7 PE=1 SV=1	8	7	7	7	2020-06-16	2020-06-16	2020-06-16	54489	475	475;258;164;91;105;107;221;73	0	59789	10620000000	590010000	9				1099	1867;2394;3640;3799;5497;6069;6787	True;True;True;True;True;True;True	1994;2557;3856;4022;5880;6485;7252	2965;2966;4001;5956;5957;5958;6165;8921;9805;10929	3179;3180;4356;6480;6481;6482;6691;9649;10614;11807	3179;4356;6481;6691;9649;10614;11807
Q6UW68;K7ELQ9;K7EPR0;K7ER05;K7EJQ9;K7EM09;K7EMV9	Q6UW68;K7ELQ9;K7EPR0	5;4;3;2;2;2;1	5;4;3;2;2;2;1	5;4;3;2;2;2;1	Transmembrane protein 205	TMEM205	sp|Q6UW68|TM205_HUMAN Transmembrane protein 205 OS=Homo sapiens OX=9606 GN=TMEM205 PE=1 SV=1;tr|K7ELQ9|K7ELQ9_HUMAN Transmembrane protein 205 (Fragment) OS=Homo sapiens OX=9606 GN=TMEM205 PE=1 SV=1;tr|K7EPR0|K7EPR0_HUMAN Transmembrane protein 205 OS=Homo s	7	5	5	5	41.8	41.8	41.8	21198	189	189;170;128;88;107;120;123	0	66345	5066600000	562950000	9				827	2198;2565;4046;5782;6647	True;True;True;True;True	2345;2735;4296;6180;6181;7100	3521;3522;4285;6537;9386;9387;9388;10735;10736	3801;3802;4670;7091;10177;10178;10179;11607;11608	3802;4670;7091;10178;11608	429	114
Q6Y1H2;C9JWG1;H7C4K8	Q6Y1H2;C9JWG1	6;3;1	6;3;1	6;3;1	Very-long-chain (3R)-3-hydroxyacyl-CoA dehydratase 2	HACD2	sp|Q6Y1H2|HACD2_HUMAN Very-long-chain (3R)-3-hydroxyacyl-CoA dehydratase 2 OS=Homo sapiens OX=9606 GN=HACD2 PE=1 SV=1;tr|C9JWG1|C9JWG1_HUMAN Very-long-chain (3R)-3-hydroxyacyl-CoA dehydratase (Fragment) OS=Homo sapiens OX=9606 GN=HACD2 PE=1 SV=1	3	6	6	6	2020-05-29	2020-05-29	2020-05-29	28368	254	254;98;61	0	44723	6607900000	550660000	9				831	77;2320;2836;4688;6005;6770	True;True;True;True;True;True	83;84;2476;3016;5028;6417;7235	148;149;150;3818;4750;7644;9714;9715;9716;10908	153;154;155;4148;5193;8296;10523;10524;10525;11785	155;4148;5193;8296;10524;11785
Q8N5M9;A0A3B3ITE9	Q8N5M9	3;1	3;1	3;1	Protein jagunal homolog 1	JAGN1	sp|Q8N5M9|JAGN1_HUMAN Protein jagunal homolog 1 OS=Homo sapiens OX=9606 GN=JAGN1 PE=1 SV=1	2	3	3	3	2020-09-16	2020-09-16	2020-09-16	21125	183	183;50	0	28992	3296000000	549330000	5				880	36;3523;4188	True;True;True	40;3736;4489;4490	94;95;5747;5748;6865;6866	99;100;6250;6251;7451;7452	100;6250;7452	443	55
P50402;Q5HY57	P50402;Q5HY57	10;7	10;7	10;7	Emerin	EMD	sp|P50402|EMD_HUMAN Emerin OS=Homo sapiens OX=9606 GN=EMD PE=1 SV=1;tr|Q5HY57|Q5HY57_HUMAN Emerin (Emery-Dreifuss muscular dystrophy), isoform CRA_b OS=Homo sapiens OX=9606 GN=EMD PE=1 SV=1	2	10	10	10	55.1	55.1	55.1	28994	254	254;219	0	125.62	7688700000	549190000	12				658	416;1050;2042;2397;2689;3052;3830;4887;5865;6735	True;True;True;True;True;True;True;True;True;True	451;1122;2182;2560;2864;3247;4054;5232;6269;7198	692;1701;3232;4004;4538;5091;6200;7950;7951;7952;9536;10851	722;1807;3454;4359;4964;5548;6727;8626;8627;8628;10340;11726	722;1807;3454;4359;4964;5548;6727;8628;10340;11726
O75844	O75844	15	15	15	CAAX prenyl protease 1 homolog	ZMPSTE24	sp|O75844|FACE1_HUMAN CAAX prenyl protease 1 homolog OS=Homo sapiens OX=9606 GN=ZMPSTE24 PE=1 SV=2	1	15	15	15	41.7	41.7	41.7	54812	475	475	0	196.82	11971000000	544120000	29				484	897;955;973;1252;1981;2237;2442;3001;3503;4256;4257;4968;5155;5356;5808	True;True;True;True;True;True;True;True;True;True;True;True;True;True;True	957;958;1019;1040;1339;1340;2119;2388;2389;2606;2607;3190;3715;3716;4572;4573;5318;5520;5729;6210	1425;1426;1567;1606;1961;1962;3158;3159;3593;3594;4063;4064;4065;4066;4969;4970;5724;5725;6978;6979;6980;6981;8080;8336;8685;8686;9447;9448	1501;1502;1664;1708;2081;2082;3380;3381;3886;3887;3888;4419;4420;4421;4422;5414;5415;6227;6228;7572;7573;7574;7575;8761;9020;9396;9397;10245;10246	1502;1664;1708;2081;3381;3887;4422;5414;6227;7572;7574;8761;9020;9397;10246	180;181;182;183	3;164;241;300
CON__P35908;P35908;CON__P35908v2;Q01546;CON__Q01546;CON__P07744;CON__Q6NXH9;H0YID6;CON__P08729;CON__Q6ISB0;CON__Q9NSB2;CON__Q3KNV1;CON__Q9DCV7;P08729;Q9NSB2;CON__REFSEQ:XP_932229;H0YHD9;F8VS61;P12036-2;P12036	CON__P35908;P35908;CON__P35908v2	41;41;41;11;10;5;4;3;2;2;2;2;2;2;2;1;1;1;1;1	37;37;37;9;8;5;3;3;2;2;2;2;2;2;2;1;1;1;1;1	23;23;23;0;0;0;0;0;0;0;0;0;0;0;0;0;0;0;0;0	Keratin, type II cytoskeletal 2 epidermal	KRT2	;sp|P35908|K22E_HUMAN Keratin, type II cytoskeletal 2 epidermal OS=Homo sapiens OX=9606 GN=KRT2 PE=1 SV=2;	20	41	37	23	61.4	58.3	42.9	65865	645	645;639;639;638;638;525;539;119;469;600;600;469;457;469;600;345;143;248;963;1026	0	323.31	24333000000	540730000	51			+	204	463;1097;1135;1229;1692;1693;1781;1842;2111;2136;2138;2438;2678;3051;3143;3144;3182;3183;3530;3665;3753;4341;4343;4477;4996;5181;5256;5401;5461;5462;5777;5778;5939;5944;5973;6209;6494;6589;6590;6594;6686	True;True;True;True;True;True;True;False;True;True;True;True;False;True;True;True;True;True;True;True;True;True;True;True;True;True;True;True;True;True;True;True;True;True;True;True;True;False;False;True;True	500;1173;1214;1215;1315;1810;1811;1906;1969;2254;2280;2282;2602;2853;3246;3344;3345;3383;3384;3743;3884;3975;4660;4662;4810;5348;5547;5622;5778;5840;5841;6175;6176;6347;6352;6382;6630;6631;6935;7039;7040;7044;7145	776;1767;1814;1815;1933;2742;2743;2744;2862;2935;2936;3350;3378;3381;4059;4525;5090;5221;5222;5271;5272;5273;5274;5809;5993;6106;6107;7164;7166;7167;7383;8118;8377;8378;8379;8380;8560;8755;8861;8862;9380;9381;9382;9630;9635;9669;10043;10044;10045;10046;10515;10660;10661;10662;10668;10793	812;1877;1924;1925;2049;2953;2954;2955;3074;3149;3150;3594;3623;3626;4415;4951;5547;5682;5683;5735;5736;5737;5738;6331;6517;6632;6633;7788;7790;7791;8028;8799;9065;9066;9067;9068;9069;9270;9473;9587;9588;10171;10172;10173;10437;10442;10476;10877;10878;10879;10880;11378;11532;11533;11534;11540;11667	812;1877;1925;2049;2953;2954;3074;3149;3594;3623;3626;4415;4951;5547;5682;5683;5736;5738;6331;6517;6633;7788;7791;8028;8799;9068;9270;9473;9587;9588;10171;10173;10437;10442;10476;10879;11378;11532;11533;11540;11667	92;93	343;473
O15258;Q5T092;A0A0A0MR06;Q5T091;Q5T093	O15258;Q5T092;A0A0A0MR06;Q5T091	7;6;6;5;3	7;6;6;5;3	7;6;6;5;3	Protein RER1	RER1	sp|O15258|RER1_HUMAN Protein RER1 OS=Homo sapiens OX=9606 GN=RER1 PE=1 SV=1;tr|Q5T092|Q5T092_HUMAN Protein RER1 (Fragment) OS=Homo sapiens OX=9606 GN=RER1 PE=1 SV=1;tr|A0A0A0MR06|A0A0A0MR06_HUMAN Protein RER1 (Fragment) OS=Homo sapiens OX=9606 GN=RER1 PE=1	5	7	7	7	31.6	31.6	31.6	22958	196	196;158;177;187;117	0	111.12	6284500000	523710000	12				441	1989;4637;4853;5083;5084;5946;6668	True;True;True;True;True;True;True	2127;4977;5198;5441;5442;5443;6354;6355;7127	3169;7589;7912;8226;8227;8228;8229;8230;9637;9638;10771;10772	3391;8240;8588;8908;8909;8910;8911;8912;10444;10445;11645;11646	3391;8240;8588;8908;8912;10445;11646	156	92
Q99720;Q99720-4;Q99720-3;Q99720-2;Q5T1J1;Q99720-5	Q99720;Q99720-4;Q99720-3;Q99720-2	5;3;3;3;2;2	5;3;3;3;2;2	5;3;3;3;2;2	Sigma non-opioid intracellular receptor 1	SIGMAR1	sp|Q99720|SGMR1_HUMAN Sigma non-opioid intracellular receptor 1 OS=Homo sapiens OX=9606 GN=SIGMAR1 PE=1 SV=1;sp|Q99720-4|SGMR1_HUMAN Isoform 4 of Sigma non-opioid intracellular receptor 1 OS=Homo sapiens OX=9606 GN=SIGMAR1;sp|Q99720-3|SGMR1_HUMAN Isoform 3	6	5	5	5	35	35	35	25127	223	223;106;192;203;134;187	0	74279	4626300000	514040000	7				990	1251;3500;4935;5108;6805	True;True;True;True;True	1338;3712;5282;5470;7270	1960;5720;8017;8018;8266;10955;10956	2080;6223;8696;8697;8948;11835;11836	2080;6223;8697;8948;11835
P61009	P61009	5	5	5	Signal peptidase complex subunit 3	SPCS3	sp|P61009|SPCS3_HUMAN Signal peptidase complex subunit 3 OS=Homo sapiens OX=9606 GN=SPCS3 PE=1 SV=1	1	5	5	5	2020-09-28	2020-09-28	2020-09-28	20313	180	180	0	35.68	5034000000	503400000	7				697	4153;4390;4465;4813;6618	True;True;True;True;True	4447;4718;4797;5157;7069	6819;7233;7356;7833;7834;7835;10701	7404;7857;7999;8493;8494;8495;11573	7404;7857;7999;8494;11573
Q969M3;Q969M3-3;E5RGR9;E5RHH4;Q969M3-2	Q969M3;Q969M3-3;E5RGR9;E5RHH4;Q969M3-2	2;2;1;1;1	2;2;1;1;1	2;2;1;1;1	Protein YIPF5;Protein YIPF	YIPF5	sp|Q969M3|YIPF5_HUMAN Protein YIPF5 OS=Homo sapiens OX=9606 GN=YIPF5 PE=1 SV=1;sp|Q969M3-3|YIPF5_HUMAN Isoform 3 of Protein YIPF5 OS=Homo sapiens OX=9606 GN=YIPF5;tr|E5RGR9|E5RGR9_HUMAN Protein YIPF5 (Fragment) OS=Homo sapiens OX=9606 GN=YIPF5 PE=1 SV=1;tr	5	2	2	2	2020-02-08	2020-02-08	2020-02-08	27989	257	257;265;101;177;203	0	16.19	972070000	486040000	3				943	4937;5699	True;True	5284;6091	8020;9277;9278	8699;10058;10059	8699;10059
O75915;F8WF90;C9JQU6;F8WF33	O75915;F8WF90;C9JQU6;F8WF33	4;2;2;2	4;2;2;2	4;2;2;2	PRA1 family protein 3	ARL6IP5	sp|O75915|PRAF3_HUMAN PRA1 family protein 3 OS=Homo sapiens OX=9606 GN=ARL6IP5 PE=1 SV=1;tr|F8WF90|F8WF90_HUMAN PRA1 family protein OS=Homo sapiens OX=9606 GN=ARL6IP5 PE=1 SV=1;tr|C9JQU6|C9JQU6_HUMAN PRA1 family protein OS=Homo sapiens OX=9606 GN=ARL6IP5 P	4	4	4	4	2020-05-24	2020-05-24	2020-05-24	21614	188	188;59;88;93	0	45013	2410600000	482120000	9				487	606;4042;4052;5739	True;True;True;True	654;4289;4290;4305;6133;6134	1001;6529;6530;6552;9323;9324;9325;9326;9327	1054;7083;7084;7106;10104;10105;10106;10107;10108	1054;7083;7106;10107	184;185;186	1;152;162
P51572;P51572-2;A0A2R8Y5M6;C9JMD7;C9JSP1;C9JQ75;C9J0M4;C9JM14	P51572;P51572-2;A0A2R8Y5M6;C9JMD7;C9JSP1;C9JQ75;C9J0M4	9;9;7;6;6;6;6;4	9;9;7;6;6;6;6;4	9;9;7;6;6;6;6;4	B-cell receptor-associated protein 31	BCAP31	sp|P51572|BAP31_HUMAN B-cell receptor-associated protein 31 OS=Homo sapiens OX=9606 GN=BCAP31 PE=1 SV=3;sp|P51572-2|BAP31_HUMAN Isoform 2 of B-cell receptor-associated protein 31 OS=Homo sapiens OX=9606 GN=BCAP31;tr|A0A2R8Y5M6|A0A2R8Y5M6_HUMAN B-cell recep	8	9	9	9	36.6	36.6	36.6	27991	246	246;313;211;178;182;187;188;138	0	71547	7936100000	466830000	18				665	154;3139;3277;3502;3737;3956;6239;6574;6719	True;True;True;True;True;True;True;True;True	167;168;3339;3481;3714;3959;4185;6664;6665;7021;7178;7179	260;261;5216;5385;5722;5723;6089;6379;6380;6381;10083;10084;10085;10086;10087;10088;10636;10829;10830	274;275;5677;5851;6225;6226;6615;6917;6918;6919;10917;10918;10919;10920;10921;10922;11508;11704;11705	275;5677;5851;6226;6615;6919;10922;11508;11705	336;337;338;339	89;151;212;241
A0A3B3IRT8;P43307;C9J3L8;C9J5W0;E9PAL7;C9IZQ1;P43307-2;C9JBX5;C9JY01	A0A3B3IRT8;P43307;C9J3L8;C9J5W0;E9PAL7;C9IZQ1;P43307-2	6;6;5;5;5;5;5;2;1	6;6;5;5;5;5;5;2;1	6;6;5;5;5;5;5;2;1	Translocon-associated protein subunit alpha	SSR1	tr|A0A3B3IRT8|A0A3B3IRT8_HUMAN Translocon-associated protein subunit alpha OS=Homo sapiens OX=9606 GN=SSR1 PE=1 SV=1;sp|P43307|SSRA_HUMAN Translocon-associated protein subunit alpha OS=Homo sapiens OX=9606 GN=SSR1 PE=1 SV=3;tr|C9J3L8|C9J3L8_HUMAN Transloco	9	6	6	6	2020-06-30	2020-06-30	2020-06-30	32449	288	288;286;265;266;291;298;259;218;103	0	98.65	5107600000	464320000	10				104	1877;2066;2325;4522;4698;5975	True;True;True;True;True;True	2005;2207;2482;4857;5038;6384	2979;3269;3893;3894;3895;7446;7654;7655;9672;9673	3193;3494;4243;4244;4245;8096;8306;8307;10479;10480	3193;3494;4243;8096;8306;10480
P16435;H0Y4R2;E7EMD0;E7EWU0;C9JU80	P16435;H0Y4R2;E7EMD0	37;34;27;2;1	37;34;27;2;1	37;34;27;2;1	NADPH--cytochrome P450 reductase	POR	sp|P16435|NCPR_HUMAN NADPH--cytochrome P450 reductase OS=Homo sapiens OX=9606 GN=POR PE=1 SV=2;tr|H0Y4R2|H0Y4R2_HUMAN NADPH--cytochrome P450 reductase (Fragment) OS=Homo sapiens OX=9606 GN=POR PE=1 SV=1;tr|E7EMD0|E7EMD0_HUMAN NADPH--cytochrome P450 reducta	5	37	37	37	68.2	68.2	68.2	76689	677	677;725;418;101;108	0	323.31	18936000000	461850000	65				570	373;541;836;1115;1255;1458;1526;1629;1700;2350;2473;2497;2534;2688;2799;2922;2934;3089;3309;3452;4317;4412;4721;4939;4995;5052;5053;5454;5483;5721;5722;5862;6055;6462;6470;6605;6814	True;True;True;True;True;True;True;True;True;True;True;True;True;True;True;True;True;True;True;True;True;True;True;True;True;True;True;True;True;True;True;True;True;True;True;True;True	403;404;582;583;894;1191;1192;1343;1555;1634;1743;1818;2509;2639;2663;2664;2702;2863;2976;3109;3122;3285;3515;3664;4636;4740;5061;5286;5347;5405;5406;5833;5864;6115;6116;6266;6470;6902;6903;6911;7055;7281	593;594;595;879;880;881;1328;1329;1788;1789;1790;1791;1965;1966;2419;2420;2421;2422;2527;2528;2663;2757;3928;4111;4112;4113;4194;4195;4196;4245;4537;4696;4854;4870;4871;5138;5139;5446;5661;5662;7130;7131;7258;7680;7681;8022;8023;8117;8184;8185;8186;8828;8829;8895;8896;9303;9304;9305;9533;9784;9785;10475;10476;10485;10486;10487;10680;10681;10989	613;614;615;917;918;919;1396;1397;1898;1899;1900;1901;2085;2086;2617;2618;2619;2620;2728;2729;2874;2968;4279;4468;4469;4470;4576;4577;4578;4629;4963;5136;5299;5315;5316;5597;5598;5930;6164;6165;7752;7753;7885;8332;8333;8701;8702;8798;8865;8866;8867;9550;9551;9621;9622;10084;10085;10086;10337;10593;10594;11335;11336;11345;11346;11347;11552;11553;11871	613;917;1396;1901;2085;2617;2728;2874;2968;4279;4468;4578;4629;4963;5136;5299;5316;5598;5930;6165;7752;7885;8333;8701;8798;8865;8866;9551;9622;10084;10086;10337;10593;11335;11346;11553;11871	255;256;257;258;259	260;301;511;530;653
Q96AG4;I3L223	Q96AG4	12;2	12;2	12;2	Leucine-rich repeat-containing protein 59	LRRC59	sp|Q96AG4|LRC59_HUMAN Leucine-rich repeat-containing protein 59 OS=Homo sapiens OX=9606 GN=LRRC59 PE=1 SV=1	2	12	12	12	45.9	45.9	45.9	34.93	307	307;62	0	170.38	10582000000	460080000	16				951	527;585;908;2421;3251;3772;3894;3940;3957;4974;5891;6352	True;True;True;True;True;True;True;True;True;True;True;True	565;631;970;2584;3455;3994;4122;4169;4186;5324;6297;6783	855;976;1443;4035;5357;6130;6302;6303;6361;6362;6382;8087;8088;9570;10296;10297	891;1028;1519;4390;5823;6656;6838;6839;6899;6900;6920;8768;8769;10376;11144;11145	891;1028;1519;4390;5823;6656;6839;6900;6920;8768;10376;11145
F5GXX5;P61803;F5H895;A0A0B4J239	F5GXX5;P61803;F5H895;A0A0B4J239	4;4;2;2	4;4;2;2	4;4;2;2	Dolichyl-diphosphooligosaccharide--protein glycosyltransferase subunit DAD1	DAD1	tr|F5GXX5|F5GXX5_HUMAN Dolichyl-diphosphooligosaccharide--protein glycosyltransferase subunit DAD1 OS=Homo sapiens OX=9606 GN=DAD1 PE=1 SV=1;sp|P61803|DAD1_HUMAN Dolichyl-diphosphooligosaccharide--protein glycosyltransferase subunit DAD1 OS=Homo sapiens OX	4	4	4	4	47.1	47.1	47.1	95541	85	85;113;65;78	0	30	2738500000	456410000	4				281	111;1838;2912;5028	True;True;True;True	120;1965;3099;5380	187;2931;4841;8159	192;3145;5286;8840	192;3145;5286;8840
F5GWH5;P61165	F5GWH5;P61165	1;1	1;1	1;1	Transmembrane protein 258	TMEM258	tr|F5GWH5|F5GWH5_HUMAN Transmembrane protein 258 OS=Homo sapiens OX=9606 GN=TMEM258 PE=1 SV=1;sp|P61165|TM258_HUMAN Transmembrane protein 258 OS=Homo sapiens OX=9606 GN=TMEM258 PE=1 SV=1	2	1	1	1	2020-03-16	2020-03-16	2020-03-16	57065	49	49;79	0.0010406	72366	456150000	456150000	2				278	4057	True	4311;4312	6562;6563	7116;7117	7117	106	1
E7END7;P62820;P62820-2;P62820-3;A0A2R8YDI9;H0YLJ8;H0YL94;G3V196;A0A2R8YFB8;P59190-2;P59190	E7END7;P62820;P62820-2	12;12;10;5;1;1;1;1;1;1;1	12;12;10;5;1;1;1;1;1;1;1	6;6;5;3;0;0;0;0;0;0;0	Ras-related protein Rab-1A	RAB1A	tr|E7END7|E7END7_HUMAN Ras-related protein Rab-1A OS=Homo sapiens OX=9606 GN=RAB1A PE=1 SV=1;sp|P62820|RAB1A_HUMAN Ras-related protein Rab-1A OS=Homo sapiens OX=9606 GN=RAB1A PE=1 SV=3;sp|P62820-2|RAB1A_HUMAN Isoform 2 of Ras-related protein Rab-1A OS=Homo	11	12	12	6	72.8	72.8	41	19018	173	173;205;141;129;44;47;48;237;246;208;212	0	138.63	7122700000	445170000	17				241	635;1276;2018;2920;3569;3636;4094;4239;5042;5644;6391;6559	True;True;True;True;True;True;True;True;True;True;True;True	684;1367;2156;3107;3782;3852;4358;4359;4553;5394;6034;6824;7004	1036;2058;3203;3204;4852;5866;5867;5950;5951;6621;6622;6623;6956;8173;9207;10344;10613	1090;2196;3425;3426;5297;6390;6391;6474;6475;7177;7178;7179;7549;8854;9988;11193;11194;11480	1090;2196;3426;5297;6390;6474;7179;7549;8854;9988;11194;11480	102	144
Q9HD20;Q9HD20-2;H7C3H2	Q9HD20;Q9HD20-2	48;46;6	48;46;6	38;36;6	Manganese-transporting ATPase 13A1	ATP13A1	sp|Q9HD20|AT131_HUMAN Manganese-transporting ATPase 13A1 OS=Homo sapiens OX=9606 GN=ATP13A1 PE=1 SV=2;sp|Q9HD20-2|AT131_HUMAN Isoform B of Manganese-transporting ATPase 13A1 OS=Homo sapiens OX=9606 GN=ATP13A1	3	48	48	38	52.2	52.2	42.2	132.95	1204	1204;1086;185	0	323.31	30971000000	442450000	76				1050	153;253;294;299;328;392;540;661;712;916;1063;1173;1291;1407;1413;1508;1648;1802;1965;2028;2107;2406;2781;3445;3483;3838;3839;3990;4189;4259;4512;4551;4642;4737;4747;5132;5156;5311;5591;5600;5986;6125;6176;6409;6418;6420;6531;6785	True;True;True;True;True;True;True;True;True;True;True;True;True;True;True;True;True;True;True;True;True;True;True;True;True;True;True;True;True;True;True;True;True;True;True;True;True;True;True;True;True;True;True;True;True;True;True;True	166;274;319;324;355;426;581;711;712;765;766;978;1135;1255;1383;1501;1507;1508;1616;1764;1928;2103;2167;2168;2250;2569;2958;3657;3695;4063;4064;4222;4223;4491;4575;4847;4886;4887;4982;5077;5089;5496;5521;5682;5979;5988;6395;6544;6596;6842;6843;6857;6860;6975;7250	259;396;397;398;399;454;455;461;462;529;530;660;878;1069;1070;1071;1145;1146;1452;1717;1863;2080;2347;2348;2349;2355;2356;2505;2687;2688;2887;2888;3139;3216;3217;3218;3346;4016;4017;4674;4675;5652;5653;5699;6210;6211;6212;6451;6452;6867;6983;7431;7477;7478;7594;7706;7722;8302;8337;8626;9138;9148;9689;9879;9880;9978;10364;10365;10366;10419;10420;10423;10424;10557;10558;10927	273;414;415;416;417;472;473;479;480;549;550;690;916;1123;1124;1125;1202;1203;1528;1823;1975;2218;2543;2544;2545;2551;2552;2706;2898;2899;3099;3100;3361;3438;3439;3440;3590;4371;4372;5113;5114;6154;6155;6202;6737;6738;6739;7004;7005;7453;7577;7578;8076;8127;8128;8245;8358;8375;8984;9021;9336;9914;9925;10498;10690;10691;10807;11214;11215;11216;11279;11280;11283;11284;11420;11421;11805	273;414;472;480;550;690;916;1123;1203;1528;1823;1975;2218;2543;2552;2706;2899;3099;3361;3440;3590;4372;5113;6154;6202;6737;6738;7005;7453;7578;8076;8128;8245;8358;8375;8984;9021;9336;9914;9925;10498;10691;10807;11216;11280;11284;11420;11805	514;515;516;517;518;519;520;521;522	300;351;360;513;633;663;745;861;987
Q9Y5M8;H7C4H2;C9J5Z8	Q9Y5M8;H7C4H2	13;9;2	13;9;2	13;9;2	Signal recognition particle receptor subunit beta	SRPRB	sp|Q9Y5M8|SRPRB_HUMAN Signal recognition particle receptor subunit beta OS=Homo sapiens OX=9606 GN=SRPRB PE=1 SV=3;tr|H7C4H2|H7C4H2_HUMAN Signal recognition particle receptor subunit beta (Fragment) OS=Homo sapiens OX=9606 GN=SRPRB PE=1 SV=1	3	13	13	13	61.6	61.6	61.6	29702	271	271;160;92	0	157.45	8361500000	418070000	18				1140	285;575;1080;1088;1279;2060;2246;3487;3752;4457;5007;5883;5967	True;True;True;True;True;True;True;True;True;True;True;True;True	309;620;1154;1162;1163;1370;2201;2398;3699;3974;4789;5359;6288;6376	439;440;441;442;964;1743;1755;1756;2062;3261;3608;3609;5703;6105;7348;8131;9559;9662	457;458;459;460;1016;1852;1864;1865;1866;2200;3485;3906;3907;6206;6631;7990;8812;10365;10469	457;1016;1852;1865;2200;3485;3907;6206;6631;7990;8812;10365;10469	580	167
P49755;G3V2K7	P49755	8;3	8;3	8;3	Transmembrane emp24 domain-containing protein 10	TMED10	sp|P49755|TMEDA_HUMAN Transmembrane emp24 domain-containing protein 10 OS=Homo sapiens OX=9606 GN=TMED10 PE=1 SV=2	2	8	8	8	35.2	35.2	35.2	24976	219	219;153	0	72502	6121000000	382560000	17				655	936;2881;2964;3286;3504;4487;4571;4983	True;True;True;True;True;True;True;True	1000;3066;3067;3152;3490;3717;4822;4910;5333;5334	1504;1505;1506;1507;4805;4806;4915;4916;5396;5726;5727;7401;7508;8097;8098;8099;8100	1582;1583;1584;1585;5249;5250;5360;5361;5862;6229;6230;8046;8158;8778;8779;8780;8781	1582;5250;5361;5862;6230;8046;8158;8779	330;331	126;168
Q5THU2;Q5T2H3;A0A2R8YCJ8;Q9NVV5-6;Q9NVV5-5;Q9NVV5-3;Q9NVV5-2;Q9NVV5;Q5T2H4;Q9NVV5-4	Q5THU2;Q5T2H3;A0A2R8YCJ8;Q9NVV5-6;Q9NVV5-5;Q9NVV5-3;Q9NVV5-2;Q9NVV5	3;3;3;3;3;3;3;3;1;1	3;3;3;3;3;3;3;3;1;1	3;3;3;3;3;3;3;3;1;1	Androgen-induced gene 1 protein	AIG1	tr|Q5THU2|Q5THU2_HUMAN Androgen-induced gene 1 protein OS=Homo sapiens OX=9606 GN=AIG1 PE=1 SV=1;tr|Q5T2H3|Q5T2H3_HUMAN Androgen-induced gene 1 protein (Fragment) OS=Homo sapiens OX=9606 GN=AIG1 PE=1 SV=8;tr|A0A2R8YCJ8|A0A2R8YCJ8_HUMAN Androgen-induced gen	10	3	3	3	53.2	53.2	53.2	53704	47	47;123;231;134;137;186;238;245;192;228	0	41793	1457500000	364370000	6				101	262;372;4008	True;True;True	283;284;402;4243	408;409;410;411;592;6472	426;427;428;429;612;7025	429;612;7025	40;41	1;29
Q9H3N1;G3V448	Q9H3N1	8;2	8;2	8;2	Thioredoxin-related transmembrane protein 1	TMX1	sp|Q9H3N1|TMX1_HUMAN Thioredoxin-related transmembrane protein 1 OS=Homo sapiens OX=9606 GN=TMX1 PE=1 SV=1	2	8	8	8	2020-04-25	2020-04-25	2020-04-25	31791	280	280;105	0	55658	5044400000	360320000	9				1036	816;824;1817;3618;5210;5211;5952;6101	True;True;True;True;True;True;True;True	873;881;1943;3833;5576;5577;6361;6518	1305;1313;2906;2907;5929;8414;8415;9645;9850	1373;1381;3119;3120;6453;9103;9104;10452;10661	1373;1381;3120;6453;9103;9104;10452;10661
P62258;P62258-2;B4DJF2;I3L3T1;K7EM20;I3L0W5;K7EIT4;F8WEB6;A2IDB1	P62258;P62258-2	16;12;6;6;6;3;3;1;1	16;12;6;6;6;3;3;1;1	13;10;4;4;5;2;2;0;0	14-3-3 protein epsilon	YWHAE	sp|P62258|1433E_HUMAN 14-3-3 protein epsilon OS=Homo sapiens OX=9606 GN=YWHAE PE=1 SV=1;sp|P62258-2|1433E_HUMAN Isoform SV of 14-3-3 protein epsilon OS=Homo sapiens OX=9606 GN=YWHAE	9	16	16	13	63.9	63.9	56.9	29174	255	255;233;94;107;115;38;109;39;72	0	181.65	7190300000	342390000	22				707	31;70;974;1067;1140;1182;2493;2770;3164;3165;4026;4362;4850;6576;6675;6676	True;True;True;True;True;True;True;True;True;True;True;True;True;True;True;True	34;76;1041;1139;1140;1220;1264;2659;2945;3365;3366;4269;4270;4683;5194;7023;7024;7025;7134;7135	86;139;1607;1721;1722;1723;1820;1874;4140;4141;4648;5245;5246;6508;6509;7192;7902;10638;10639;10640;10781;10782	90;144;1709;1827;1828;1829;1930;1987;4497;4498;5086;5706;5707;5708;7061;7062;7816;8578;11510;11511;11512;11655;11656	90;144;1709;1827;1930;1987;4498;5086;5707;5708;7062;7816;8578;11510;11655;11656	288;367;368;369;370	1;23;27;88;221
P55060;P55060-3;P55060-4;P55060-2	P55060;P55060-3;P55060-4	49;48;44;11	49;48;44;11	49;48;44;11	Exportin-2	CSE1L	sp|P55060|XPO2_HUMAN Exportin-2 OS=Homo sapiens OX=9606 GN=CSE1L PE=1 SV=3;sp|P55060-3|XPO2_HUMAN Isoform 3 of Exportin-2 OS=Homo sapiens OX=9606 GN=CSE1L;sp|P55060-4|XPO2_HUMAN Isoform 4 of Exportin-2 OS=Homo sapiens OX=9606 GN=CSE1L	4	49	49	49	67.5	67.5	67.5	110.42	971	971;945;915;195	0	323.31	21098000000	340290000	72				682	16;18;19;362;397;399;732;917;918;1331;1343;1761;1845;1923;1979;2269;2447;2729;2758;2796;2888;2990;3595;3607;3626;3845;3926;4060;4074;4248;4346;4423;4779;4833;4958;5023;5117;5278;5320;5595;5657;5922;6103;6272;6528;6575;6582;6632;6664	True;True;True;True;True;True;True;True;True;True;True;True;True;True;True;True;True;True;True;True;True;True;True;True;True;True;True;True;True;True;True;True;True;True;True;True;True;True;True;True;True;True;True;True;True;True;True;True;True	17;19;20;390;391;431;433;788;979;980;1423;1424;1436;1885;1972;2056;2117;2422;2612;2904;2933;2973;3074;3178;3808;3821;3841;3842;4070;4155;4316;4317;4333;4563;4666;4752;5122;5177;5305;5375;5480;5648;5691;5983;6047;6328;6520;6521;6699;6700;6971;7022;7032;7083;7120;7121	18;20;21;575;576;665;666;668;669;1182;1183;1184;1453;1454;1455;2247;2248;2249;2266;2267;2839;2840;2939;2940;3050;3051;3155;3156;3640;4072;4073;4581;4582;4632;4692;4693;4813;4953;5897;5913;5914;5937;5938;6235;6342;6343;6567;6568;6586;6966;6967;7174;7276;7764;7879;8056;8152;8277;8278;8588;8638;9142;9221;9610;9852;9853;10137;10138;10553;10637;10651;10652;10717;10761;10762	18;20;21;595;596;695;696;698;699;1241;1242;1243;1529;1530;1531;2441;2442;2443;2460;2461;3051;3052;3153;3154;3266;3267;3377;3378;3938;4428;4429;5007;5008;5070;5132;5133;5257;5398;6421;6437;6438;6461;6462;6770;6880;6881;7121;7122;7141;7559;7560;7798;7904;8418;8547;8736;8833;8959;8960;9298;9349;9918;10002;10417;10663;10664;10973;10974;11416;11509;11523;11524;11589;11635;11636	18;20;21;596;696;699;1243;1529;1531;2441;2461;3052;3154;3267;3377;3938;4429;5007;5070;5132;5257;5398;6421;6437;6461;6770;6880;7121;7141;7560;7798;7904;8418;8547;8736;8833;8960;9298;9349;9918;10002;10417;10663;10973;11416;11509;11524;11589;11636	345;346;347;348;349;350;351;352	1;352;489;573;856;857;920;946
I3L3B4;F8W9H0;E9PLN8;Q9BQB6-3;Q9BQB6-2;Q9BQB6	I3L3B4;F8W9H0;E9PLN8;Q9BQB6-3;Q9BQB6-2;Q9BQB6	2;2;2;2;2;2	2;2;2;2;2;2	2;2;2;2;2;2	Vitamin K epoxide reductase complex subunit 1	VKORC1	tr|I3L3B4|I3L3B4_HUMAN Uncharacterized protein (Fragment) OS=Homo sapiens OX=9606 PE=4 SV=1;tr|F8W9H0|F8W9H0_HUMAN Vitamin K epoxide reductase complex subunit 1 OS=Homo sapiens OX=9606 GN=VKORC1 PE=4 SV=1;tr|E9PLN8|E9PLN8_HUMAN Uncharacterized protein (Fra	6	2	2	2	2020-01-23	2020-01-23	2020-01-23	11082	104	104;149;166;92;156;163	0	2020-04-20	2373400000	339060000	2				268	302;2319	True;True	327;2475	466;3817	484;4147	484;4147
P00387-2;P00387;P00387-3;B1AHF3	P00387-2;P00387;P00387-3;B1AHF3	13;13;13;7	13;13;13;7	13;13;13;7	NADH-cytochrome b5 reductase 3;NADH-cytochrome b5 reductase 3 membrane-bound form;NADH-cytochrome b5 reductase 3 soluble form	CYB5R3	sp|P00387-2|NB5R3_HUMAN Isoform 2 of NADH-cytochrome b5 reductase 3 OS=Homo sapiens OX=9606 GN=CYB5R3;sp|P00387|NB5R3_HUMAN NADH-cytochrome b5 reductase 3 OS=Homo sapiens OX=9606 GN=CYB5R3 PE=1 SV=3;sp|P00387-3|NB5R3_HUMAN Isoform 3 of NADH-cytochrome b5 r	4	13	13	13	69.4	69.4	69.4	31628	278	278;301;334;147	0	233.72	5763700000	339040000	19				515	412;865;889;994;1366;1685;1687;2271;2652;2653;3977;5399;5421	True;True;True;True;True;True;True;True;True;True;True;True;True	447;925;949;1064;1459;1803;1805;2424;2826;2827;4208;5776;5798;5799	687;1364;1415;1416;1633;1634;2296;2297;2733;2735;2736;3642;4489;4490;4491;6410;8753;8778;8779;8780;8781	717;1432;1491;1492;1735;1736;2490;2491;2944;2946;2947;3940;4913;4914;4915;6949;9471;9496;9497;9498;9499	717;1432;1491;1736;2490;2944;2947;3940;4913;4914;6949;9471;9498	192;193	154;164
Q96HV5;H7BXL1;F8WDE2	Q96HV5	5;2;2	5;2;2	5;2;2	Transmembrane protein 41A	TMEM41A	sp|Q96HV5|TM41A_HUMAN Transmembrane protein 41A OS=Homo sapiens OX=9606 GN=TMEM41A PE=1 SV=1	3	5	5	5	2020-05-20	2020-05-20	2020-05-20	29665	264	264;92;99	0	37711	3713000000	337540000	6				966	2504;3418;4844;5258;5899	True;True;True;True;True	2671;3629;5188;5624;6305	4204;4205;5613;7896;8562;9580	4586;4587;6114;8572;9272;10386	4587;6114;8572;9272;10386
A0A286YF22;O43175;A0A2C9F2M7;A0A286YFA2;A0A286YFL2;A0A286YFM8;A0A286YER3;A0A286YFC8;A0A286YFB2;A0A286YF78;A0A286YF34;A0A286YFE1;A0A286YFF3;A0A286YFK5	A0A286YF22;O43175;A0A2C9F2M7;A0A286YFA2;A0A286YFL2;A0A286YFM8	20;20;18;15;14;10;6;6;6;6;3;3;2;2	20;20;18;15;14;10;6;6;6;6;3;3;2;2	20;20;18;15;14;10;6;6;6;6;3;3;2;2	D-3-phosphoglycerate dehydrogenase	PHGDH	tr|A0A286YF22|A0A286YF22_HUMAN D-3-phosphoglycerate dehydrogenase OS=Homo sapiens OX=9606 GN=PHGDH PE=1 SV=1;sp|O43175|SERA_HUMAN D-3-phosphoglycerate dehydrogenase OS=Homo sapiens OX=9606 GN=PHGDH PE=1 SV=4;tr|A0A2C9F2M7|A0A2C9F2M7_HUMAN D-3-phosphoglycer	14	20	20	20	46.2	46.2	46.2	55938	526	526;533;532;445;429;239;97;123;165;276;72;89;63;145	0	291.63	9775400000	325850000	28				95	232;233;368;649;940;1882;2128;2332;2826;3786;4230;4663;4681;4774;4784;5250;5668;5759;6152;6343	True;True;True;True;True;True;True;True;True;True;True;True;True;True;True;True;True;True;True;True	252;253;398;699;1004;2012;2013;2272;2489;3006;4009;4541;5003;5021;5117;5127;5128;5616;6058;6155;6571;6774	358;359;585;586;587;1053;1054;1512;2987;2988;3369;3905;4733;6147;6941;7616;7637;7757;7758;7801;7802;8552;8553;9232;9350;9351;9914;10285	372;373;605;606;607;1107;1108;1590;3201;3202;3613;4255;5173;6673;7534;8267;8288;8411;8412;8460;8461;9262;9263;10013;10131;10132;10726;11132	372;373;605;1108;1590;3202;3613;4255;5173;6673;7534;8267;8288;8412;8461;9263;10013;10132;10726;11132	37;38	128;139
O95292;E5RK64;O95292-2	O95292	11;3;3	10;2;2	10;2;2	Vesicle-associated membrane protein-associated protein B/C	VAPB	sp|O95292|VAPB_HUMAN Vesicle-associated membrane protein-associated protein B/C OS=Homo sapiens OX=9606 GN=VAPB PE=1 SV=3	3	11	10	10	52.3	47.3	47.3	27228	243	243;71;99	0	99877	6180700000	325300000	15				501	719;1171;1247;1885;2262;2772;3409;5247;5248;5847;5981	True;True;True;True;False;True;True;True;True;True;True	773;1253;1334;2017;2415;2947;3619;5613;5614;6250;6390	1153;1154;1155;1859;1860;1861;1956;2993;3633;4650;5602;8548;8549;9516;9680;9681	1210;1211;1212;1971;1972;1973;2076;3207;3931;5088;6103;9258;9259;10320;10487;10488	1212;1972;2076;3207;3931;5088;6103;9258;9259;10320;10487
Q14165;F5H1S8;H0YG07;F5GX14	Q14165;F5H1S8	11;9;5;4	11;9;5;4	11;9;5;4	Malectin	MLEC	sp|Q14165|MLEC_HUMAN Malectin OS=Homo sapiens OX=9606 GN=MLEC PE=1 SV=1;tr|F5H1S8|F5H1S8_HUMAN Malectin (Fragment) OS=Homo sapiens OX=9606 GN=MLEC PE=1 SV=1	4	11	11	11	44.2	44.2	44.2	32233	292	292;146;173;217	0	223.92	6405200000	320260000	15				757	470;915;1245;3055;3671;3765;3848;5288;5921;6027;6728	True;True;True;True;True;True;True;True;True;True;True	507;977;1332;3250;3892;3987;4074;5659;6327;6439;6440;7190	784;1451;1954;5094;5095;6002;6003;6122;6123;6240;8601;9609;9742;9743;9744;9745;10841	820;1527;2074;5551;5552;6527;6528;6648;6649;6775;9311;10416;10551;10552;10553;10554;11716	820;1527;2074;5552;6527;6649;6775;9311;10416;10554;11716	391;392	171;211
D6RAX1;D6RB80;D6RCT8;D6RID1;A0A087WYP9;A6NFV8;Q96EV8-2;Q96EV8	D6RAX1;D6RB80;D6RCT8;D6RID1;A0A087WYP9;A6NFV8;Q96EV8-2;Q96EV8	1;1;1;1;1;1;1;1	1;1;1;1;1;1;1;1	1;1;1;1;1;1;1;1	Dysbindin	DTNBP1	tr|D6RAX1|D6RAX1_HUMAN Dysbindin OS=Homo sapiens OX=9606 GN=DTNBP1 PE=1 SV=1;tr|D6RB80|D6RB80_HUMAN Dysbindin OS=Homo sapiens OX=9606 GN=DTNBP1 PE=4 SV=1;tr|D6RCT8|D6RCT8_HUMAN Dysbindin OS=Homo sapiens OX=9606 GN=DTNBP1 PE=1 SV=1;tr|D6RID1|D6RID1_HUMAN Dy	8	1	1	1	2020-06-13	2020-06-13	2020-06-13	51538	44	44;46;208;230;316;334;303;351	1	-2	1262300000	315570000	1	+			24	4118	True	4393	6672	7246	7246	10	1
P08238;Q58FF7	P08238	32;9	21;3	17;3	Heat shock protein HSP 90-beta	HSP90AB1	sp|P08238|HS90B_HUMAN Heat shock protein HSP 90-beta OS=Homo sapiens OX=9606 GN=HSP90AB1 PE=1 SV=4	2	32	21	17	47.9	33.8	2020-01-29	83263	724	724;597	0	323.31	15400000000	314280000	29				542	116;121;287;333;668;953;982;1217;1313;1314;1418;1993;2098;2384;2436;2487;2657;2670;2935;3394;3805;4407;4564;4952;4973;5179;5253;5695;5999;6431;6606;6653	True;False;True;True;True;True;True;False;False;False;False;True;True;False;False;True;True;True;False;True;False;True;True;True;True;True;False;True;True;True;False;True	126;133;312;360;719;1017;1051;1052;1302;1405;1406;1513;2131;2241;2546;2600;2653;2831;2845;3123;3604;4028;4735;4902;5299;5323;5545;5619;6087;6409;6410;6871;7056;7108;7109	207;221;445;537;538;1081;1565;1617;1618;1916;2225;2226;2227;2363;3174;3336;3337;3987;3988;4055;4056;4057;4132;4133;4495;4515;4872;4873;5584;6171;7252;7498;8049;8086;8374;8556;8557;9270;9705;9706;9707;10437;10682;10746;10747;10748	217;235;463;557;558;1135;1662;1719;1720;2030;2418;2419;2420;2559;3396;3580;3581;4342;4343;4411;4412;4413;4489;4490;4919;4941;5317;5318;6084;6698;7879;8148;8729;8767;9062;9266;9267;10051;10514;10515;10516;11297;11554;11619;11620;11621	217;235;463;557;1135;1662;1720;2030;2418;2420;2559;3396;3580;4343;4413;4490;4919;4941;5317;6084;6698;7879;8148;8729;8767;9062;9267;10051;10514;11297;11554;11621	220;221;222;223;224	363;466;617;620;621
Q96GC9;Q96GC9-2;K7EPE7;K7EL93;K7EL74;K7ENU2;K7EK01;K7EMI0;K7ELS2;K7EL46	Q96GC9;Q96GC9-2;K7EPE7	8;5;4;2;2;2;2;2;2;1	8;5;4;2;2;2;2;2;2;1	8;5;4;2;2;2;2;2;2;1	Vacuole membrane protein 1	VMP1	sp|Q96GC9|VMP1_HUMAN Vacuole membrane protein 1 OS=Homo sapiens OX=9606 GN=VMP1 PE=1 SV=1;sp|Q96GC9-2|VMP1_HUMAN Isoform 2 of Vacuole membrane protein 1 OS=Homo sapiens OX=9606 GN=VMP1;tr|K7EPE7|K7EPE7_HUMAN Vacuole membrane protein 1 (Fragment) OS=Homo sa	10	8	8	8	33	33	33	46237	406	406;214;225;74;75;78;92;138;167;58	0	117.4	5630900000	312830000	15				963	1338;2479;2668;2700;3812;4528;4854;5096	True;True;True;True;True;True;True;True	1431;2645;2843;2875;4035;4036;4863;5199;5456;5457	2259;2260;2261;4122;4123;4512;4549;4550;6179;6180;6181;7452;7913;8246;8247	2453;2454;2455;4479;4480;4938;4975;4976;6706;6707;6708;8102;8589;8928;8929	2454;4480;4938;4976;6707;8102;8589;8929	483;484	230;355
P51149;C9J592;C9J8S3;C9IZZ0;C9J4V0;C9J4S4;C9J7D1	P51149;C9J592;C9J8S3;C9IZZ0;C9J4V0	12;9;8;6;6;5;3	12;9;8;6;6;5;3	12;9;8;6;6;5;3	Ras-related protein Rab-7a	RAB7A	sp|P51149|RAB7A_HUMAN Ras-related protein Rab-7a OS=Homo sapiens OX=9606 GN=RAB7A PE=1 SV=1;tr|C9J592|C9J592_HUMAN Ras-related protein Rab-7a (Fragment) OS=Homo sapiens OX=9606 GN=RAB7A PE=1 SV=1;tr|C9J8S3|C9J8S3_HUMAN Ras-related protein Rab-7a OS=Homo sa	7	12	12	12	67.1	67.1	67.1	23489	207	207;150;160;116;134;98;91	0	146.8	5584200000	310230000	17				662	996;1169;1924;1939;2009;3958;4396;4739;5658;5659;5773;6084	True;True;True;True;True;True;True;True;True;True;True;True	1066;1250;2057;2074;2147;4187;4188;4724;5079;6048;6049;6170;6500	1636;1854;1855;3052;3077;3191;3192;6383;6384;7240;7709;7710;9222;9223;9374;9826	1738;1739;1965;1966;3268;3294;3413;3414;6921;6922;7866;8361;8362;10003;10004;10165;10637	1739;1965;3268;3294;3413;6922;7866;8362;10003;10004;10165;10637	334	59
B4E1G1;Q9BUN8-2;Q9BUN8;E5RGY0	B4E1G1;Q9BUN8-2;Q9BUN8;E5RGY0	6;6;6;3	6;6;6;3	6;6;6;3	Derlin-1	DERL1	tr|B4E1G1|B4E1G1_HUMAN Derlin OS=Homo sapiens OX=9606 GN=DERL1 PE=1 SV=1;sp|Q9BUN8-2|DERL1_HUMAN Isoform 2 of Derlin-1 OS=Homo sapiens OX=9606 GN=DERL1;sp|Q9BUN8|DERL1_HUMAN Derlin-1 OS=Homo sapiens OX=9606 GN=DERL1 PE=1 SV=1;tr|E5RGY0|E5RGY0_HUMAN Derlin	4	6	6	6	49	49	49	17033	151	151;231;251;151	0	47.84	3063900000	306390000	12				145	2141;2528;3402;4278;5060;6807	True;True;True;True;True;True	2285;2286;2696;3612;4594;5413;5414;7272	3385;3386;4238;5594;5595;7029;8195;8196;10958;10959;10960	3630;3631;4622;6095;6096;7630;8877;8878;11838;11839;11840;11841	3630;4622;6095;7630;8878;11838	52	127
Q9P0S9	Q9P0S9	3	3	3	Transmembrane protein 14C	TMEM14C	sp|Q9P0S9|TM14C_HUMAN Transmembrane protein 14C OS=Homo sapiens OX=9606 GN=TMEM14C PE=1 SV=1	1	3	3	3	50	50	50	11564	112	112	0	27979	1529200000	305840000	8				1095	230;1884;6040	True;True;True	250;2015;2016;6454;6455	354;355;356;2990;2991;2992;9763;9764	368;369;370;3204;3205;3206;10572;10573	370;3204;10572	558;559	99;107
Q5JTV8-3;A0A0A0MSK5;J3KN66;Q5JTV8;H0Y4R4;Q5JTV8-2;H0YD16;H0YDU3	Q5JTV8-3;A0A0A0MSK5;J3KN66;Q5JTV8;H0Y4R4;Q5JTV8-2	21;20;20;20;11;11;6;4	21;20;20;20;11;11;6;4	20;19;19;19;10;10;6;4	Torsin-1A-interacting protein 1	TOR1AIP1	sp|Q5JTV8-3|TOIP1_HUMAN Isoform 3 of Torsin-1A-interacting protein 1 OS=Homo sapiens OX=9606 GN=TOR1AIP1;tr|A0A0A0MSK5|A0A0A0MSK5_HUMAN Torsin-1A-interacting protein 1 OS=Homo sapiens OX=9606 GN=TOR1AIP1 PE=1 SV=1;tr|J3KN66|J3KN66_HUMAN Torsin-1A-interacti	8	21	21	20	51	51	49.3	66319	584	584;462;599;583;296;379;198;193	0	323.31	12202000000	305050000	32				801	684;737;1056;1091;1755;1960;2947;3323;3672;3773;4166;4290;4859;4926;5092;5168;5331;5371;6230;6565;6588	True;True;True;True;True;True;True;True;True;True;True;True;True;True;True;True;True;True;True;True;True	735;793;1128;1166;1878;2097;2098;3135;3529;3893;3995;3996;4463;4464;4607;5204;5273;5451;5534;5703;5744;6655;7010;7038	1100;1190;1708;1709;1759;1760;2828;3127;3128;3129;4891;4892;5462;6004;6131;6132;6133;6837;6838;7084;7085;7918;8005;8239;8355;8655;8702;8703;10073;10619;10659	1154;1250;1814;1815;1869;1870;3040;3348;3349;3350;5336;5337;5946;5947;6529;6657;6658;6659;7423;7424;7703;7704;8594;8684;8921;9042;9366;9413;9414;10907;11487;11531	1154;1250;1815;1869;3040;3350;5337;5947;6529;6659;7423;7704;8594;8684;8921;9042;9366;9414;10907;11487;11531	422;423;424	146;302;553
P30519;A0A087WT44;P30519-2;I3L159;I3L1F5;I3L4P8;A0A1B0GXH0;I3L463;I3L276;I3L1Y2	P30519;A0A087WT44;P30519-2;I3L159;I3L1F5	16;15;15;13;13;7;7;7;6;5	16;15;15;13;13;7;7;7;6;5	16;15;15;13;13;7;7;7;6;5	Heme oxygenase 2	HMOX2	sp|P30519|HMOX2_HUMAN Heme oxygenase 2 OS=Homo sapiens OX=9606 GN=HMOX2 PE=1 SV=2;tr|A0A087WT44|A0A087WT44_HUMAN Heme oxygenase 2 OS=Homo sapiens OX=9606 GN=HMOX2 PE=1 SV=1;sp|P30519-2|HMOX2_HUMAN Isoform 2 of Heme oxygenase 2 OS=Homo sapiens OX=9606 GN=HM	10	16	16	16	64.6	64.6	64.6	36032	316	316;370;287;229;238;130;131;132;110;110	0	277.63	6355900000	302660000	24				615	155;172;866;961;1162;1549;1592;2737;2991;3220;3727;3999;4142;5011;5485;6720	True;True;True;True;True;True;True;True;True;True;True;True;True;True;True;True	169;187;188;926;1028;1243;1658;1702;2912;3179;3422;3423;3948;4232;4233;4432;5363;5866;7180;7181	262;280;281;282;1365;1592;1593;1845;2557;2615;2616;4591;4592;4593;4954;5320;5321;6072;6073;6461;6462;6803;8136;8898;10831;10832	276;294;295;296;1433;1694;1695;1956;2759;2826;2827;5017;5018;5019;5399;5786;5787;6598;6599;7014;7015;7388;8817;9624;11706;11707	276;296;1433;1694;1956;2759;2827;5019;5399;5787;6599;7014;7388;8817;9624;11706	298;299;300;301;302	30;85;158;213;231
Q14257;Q14257-2;A8MXP8;H0YL43	Q14257;Q14257-2;A8MXP8	15;15;9;7	15;15;9;7	15;15;9;7	Reticulocalbin-2	RCN2	sp|Q14257|RCN2_HUMAN Reticulocalbin-2 OS=Homo sapiens OX=9606 GN=RCN2 PE=1 SV=1;sp|Q14257-2|RCN2_HUMAN Isoform 2 of Reticulocalbin-2 OS=Homo sapiens OX=9606 GN=RCN2;tr|A8MXP8|A8MXP8_HUMAN Reticulocalbin-2 OS=Homo sapiens OX=9606 GN=RCN2 PE=1 SV=1	4	15	15	15	59.9	59.9	59.9	36876	317	317;335;216;155	0	203.86	5107400000	300440000	17				758	140;1179;1970;2600;3104;3262;3263;3802;4286;4435;4816;4865;6065;6066;6487	True;True;True;True;True;True;True;True;True;True;True;True;True;True;True	153;1261;2108;2772;3300;3466;3467;4025;4603;4765;5160;5210;6481;6482;6928	244;1870;3145;4335;5157;5369;5370;6168;7080;7291;7838;7839;7924;9801;9802;10508	258;1982;3367;4721;5617;5835;5836;6694;6695;7699;7919;8498;8499;8600;10610;10611;11371	258;1982;3367;4721;5617;5835;5836;6695;7699;7919;8499;8600;10610;10611;11371	393	126
O14735;B3KY94;O14735-3;H3BUR9;O14735-2	O14735;B3KY94;O14735-3;H3BUR9	5;4;4;3;1	5;4;4;3;1	5;4;4;3;1	CDP-diacylglycerol--inositol 3-phosphatidyltransferase	CDIPT	sp|O14735|CDIPT_HUMAN CDP-diacylglycerol--inositol 3-phosphatidyltransferase OS=Homo sapiens OX=9606 GN=CDIPT PE=1 SV=1;tr|B3KY94|B3KY94_HUMAN CDP-diacylglycerol--inositol 3-phosphatidyltransferase OS=Homo sapiens OX=9606 GN=CDIPT PE=1 SV=1;sp|O14735-3|CDI	5	5	5	5	2020-05-30	2020-05-30	2020-05-30	23539	213	213;237;168;157;182	0	57499	2699800000	299980000	8				430	1774;4093;4100;4513;5220	True;True;True;True;True	1898;4356;4357;4365;4366;4848;5586	2853;6619;6620;6629;6630;7432;8427;8428	3065;7175;7176;7185;7186;8077;9116;9117	3065;7176;7185;8077;9116	143;144	122;174
P21964-2;P21964;E7EMS6;E7EUU8;F8WBW9;H7BZ45	P21964-2;P21964;E7EMS6;E7EUU8	15;15;11;10;7;4	15;15;11;10;7;4	15;15;11;10;7;4	Catechol O-methyltransferase	COMT	sp|P21964-2|COMT_HUMAN Isoform Soluble of Catechol O-methyltransferase OS=Homo sapiens OX=9606 GN=COMT;sp|P21964|COMT_HUMAN Catechol O-methyltransferase OS=Homo sapiens OX=9606 GN=COMT PE=1 SV=2;tr|E7EMS6|E7EMS6_HUMAN Catechol O-methyltransferase (Fragment	6	15	15	15	86.4	86.4	86.4	24449	221	221;271;223;235;199;152	0	237.8	4020700000	287190000	20				586	1650;1656;1657;2313;2345;2822;2988;3081;3140;3495;3621;4201;6366;6585;6705	True;True;True;True;True;True;True;True;True;True;True;True;True;True;True	1766;1772;1773;2469;2504;3002;3176;3277;3340;3341;3707;3836;4506;6797;7035;7164	2690;2699;2700;2701;3810;3811;3922;3923;4726;4727;4949;4950;5128;5217;5218;5714;5932;6883;10312;10656;10813	2901;2910;2911;2912;4140;4141;4272;4273;5166;5167;5394;5395;5585;5678;5679;6217;6456;7469;11160;11528;11687	2901;2910;2911;4141;4272;5166;5394;5585;5679;6217;6456;7469;11160;11528;11687	283	137
Q7Z7H5;Q7Z7H5-3;Q7Z7H5-2;F8W7F7	Q7Z7H5;Q7Z7H5-3;Q7Z7H5-2;F8W7F7	7;6;6;4	7;6;6;4	6;5;5;3	Transmembrane emp24 domain-containing protein 4	TMED4	sp|Q7Z7H5|TMED4_HUMAN Transmembrane emp24 domain-containing protein 4 OS=Homo sapiens OX=9606 GN=TMED4 PE=1 SV=1;sp|Q7Z7H5-3|TMED4_HUMAN Isoform 3 of Transmembrane emp24 domain-containing protein 4 OS=Homo sapiens OX=9606 GN=TMED4;sp|Q7Z7H5-2|TMED4_HUMAN I	4	7	7	6	39.2	39.2	2020-07-31	25943	227	227;186;211;178	0	85027	4810300000	282960000	13				849	644;1626;3860;3890;4006;4824;6049	True;True;True;True;True;True;True	693;694;1739;1740;4086;4118;4241;5168;6464	1046;1047;1048;2657;2658;2659;6252;6298;6470;7869;9775;9776;9777	1100;1101;1102;2868;2869;2870;6787;6834;7023;8537;10584;10585;10586	1102;2869;6787;6834;7023;8537;10586	436;437	51;77
P61019;P61019-2;E9PKL7;A0A3B3ITL1;Q8WUD1;H7C125;H0YD31;E9PE37;Q8WUD1-2;A0A1D5RMT4;H0YDL5;Q6PIK3	P61019;P61019-2;E9PKL7;A0A3B3ITL1;Q8WUD1	13;10;8;7;7;5;4;3;3;1;1;1	13;10;8;7;7;5;4;3;3;1;1;1	13;10;8;7;7;5;4;3;3;1;1;1	Ras-related protein Rab-2A;Ras-related protein Rab-2B	RAB2A;RAB2B	sp|P61019|RAB2A_HUMAN Ras-related protein Rab-2A OS=Homo sapiens OX=9606 GN=RAB2A PE=1 SV=1;sp|P61019-2|RAB2A_HUMAN Isoform 2 of Ras-related protein Rab-2A OS=Homo sapiens OX=9606 GN=RAB2A;tr|E9PKL7|E9PKL7_HUMAN Ras-related protein Rab-2A OS=Homo sapiens O	12	13	13	13	67	67	67	23545	212	212;188;181;208;216;104;135;62;151;10;69;121	0	129.01	4482700000	280170000	18				698	613;1075;1246;1336;1921;2007;2909;3056;3758;4106;5041;5496;6663	True;True;True;True;True;True;True;True;True;True;True;True;True	661;1148;1333;1429;2054;2145;3095;3251;3980;4373;5393;5879;7119	1009;1732;1733;1955;2255;2256;3047;3048;3189;4836;5096;6113;6637;8172;8920;10760	1062;1838;1839;1840;2075;2449;2450;3263;3264;3411;5281;5553;6639;7193;8853;9648;11633;11634	1062;1839;2075;2450;3264;3411;5281;5553;6639;7193;8853;9648;11634	365	47
P81605;P81605-2	P81605;P81605-2	3;3	3;3	3;3	Dermcidin;Survival-promoting peptide;DCD-1	DCD	sp|P81605|DCD_HUMAN Dermcidin OS=Homo sapiens OX=9606 GN=DCD PE=1 SV=2;sp|P81605-2|DCD_HUMAN Isoform 2 of Dermcidin OS=Homo sapiens OX=9606 GN=DCD	2	3	3	3	2020-07-22	2020-07-22	2020-07-22	11284	110	110;121	0	29278	1940100000	277150000	5				724	767;1477;3396	True;True;True	824;1585;3606	1234;2474;5587;5588	1297;1298;2674;6087;6088	1297;2674;6088
A2NJV5;A0A0A0MRZ7;A0A075B6S2;A0A087X0Q4;A0A075B6S6;A0A075B6P5;A0A0C4DH68;A0A075B6R9;A0A087WW87;P06310;P01615;P01614	A2NJV5;A0A0A0MRZ7;A0A075B6S2;A0A087X0Q4;A0A075B6S6;A0A075B6P5;A0A0C4DH68;A0A075B6R9;A0A087WW87;P06310;P01615;P01614	2;2;2;1;1;1;1;1;1;1;1;1	2;2;2;1;1;1;1;1;1;1;1;1	2;2;2;1;1;1;1;1;1;1;1;1	Ig kappa chain V-II region RPMI 6410;Ig kappa chain V-II region FR;Ig kappa chain V-II region Cum	IGKV A18;IGKV2D-26;IGKV2D-29;IGKV2-40;IGKV2D-30;IGKV2D-28;IGKV2-24;IGKV2D-24	sp|A2NJV5|KV229_HUMAN Immunoglobulin kappa variable 2-29 OS=Homo sapiens OX=9606 GN=IGKV2-29 PE=3 SV=2;sp|A0A0A0MRZ7|KVD26_HUMAN Immunoglobulin kappa variable 2D-26 OS=Homo sapiens OX=9606 GN=IGKV2D-26 PE=3 SV=1;sp|A0A075B6S2|KVD29_HUMAN Immunoglobulin kap	12	2	2	2	2020-07-16	2020-07-16	2020-07-16	13085	120	120;120;120;104;120;120;120;120;121;120;120;121	0	13186	1658800000	276460000	2				4	1933;1934	True;True	2066;2067	3063;3064	3279;3280	3279;3280
P49368;B4DUR8;P49368-2;Q5SZX6;E9PRC8;E9PQ35;Q5SZW8;Q5SZX9;E9PM09	P49368;B4DUR8;P49368-2	25;24;23;10;9;6;6;4;3	25;24;23;10;9;6;6;4;3	25;24;23;10;9;6;6;4;3	T-complex protein 1 subunit gamma	CCT3	sp|P49368|TCPG_HUMAN T-complex protein 1 subunit gamma OS=Homo sapiens OX=9606 GN=CCT3 PE=1 SV=4;tr|B4DUR8|B4DUR8_HUMAN T-complex protein 1 subunit gamma OS=Homo sapiens OX=9606 GN=CCT3 PE=1 SV=1;sp|P49368-2|TCPG_HUMAN Isoform 2 of T-complex protein 1 subu	9	25	25	25	59.6	59.6	59.6	60533	545	545;500;507;276;234;144;188;161;154	0	246.72	11837000000	275290000	38				653	98;304;394;554;1370;1374;1408;2082;2175;2647;2703;2832;2887;2948;3002;3019;4123;4215;4216;4370;4474;5504;5672;6301;6539	True;True;True;True;True;True;True;True;True;True;True;True;True;True;True;True;True;True;True;True;True;True;True;True;True	106;329;330;428;596;1463;1467;1502;2223;2320;2321;2821;2878;3012;3073;3136;3191;3210;4398;4524;4525;4691;4692;4806;4807;5887;6062;6730;6983	172;468;469;662;896;2302;2306;2307;2350;3286;3450;3451;3452;4481;4482;4553;4745;4746;4812;4893;4894;4971;4992;4993;4994;6677;6922;6923;6924;7201;7202;7369;7370;7371;8932;8933;9236;10173;10570	177;486;487;692;934;2496;2500;2501;2546;3511;3710;3711;3712;4905;4906;4979;5188;5189;5256;5338;5339;5416;5437;5438;5439;7251;7515;7516;7517;7825;7826;8013;8014;8015;9662;9663;10017;11009;11434	177;486;692;934;2496;2501;2546;3511;3712;4906;4979;5188;5256;5338;5416;5439;7251;7515;7517;7826;8015;9662;10017;11009;11434	325;326;327;328;329	133;305;395;416;429
P14625;Q96GW1;A0A1W2PRR1;H0YIV0;Q58FF3;F8W026	P14625	33;12;12;5;5;2	33;12;12;5;5;2	32;11;11;5;5;1	Endoplasmin	HSP90B1	sp|P14625|ENPL_HUMAN Endoplasmin OS=Homo sapiens OX=9606 GN=HSP90B1 PE=1 SV=1	6	33	33	32	47.9	47.9	46.5	92468	803	803;315;315;147;399;48	0	314.1	15355000000	269390000	46				567	901;1158;1234;1280;1418;1619;1683;1919;1925;2192;2383;2393;3028;3422;3468;3491;3822;3862;4360;4361;5002;5142;5145;5163;5519;5551;5552;5559;5831;5855;6002;6727;6777	True;True;True;True;True;True;True;True;True;True;True;True;True;True;True;True;True;True;True;True;True;True;True;True;True;True;True;True;True;True;True;True;True	962;1239;1321;1371;1372;1513;1732;1801;2052;2058;2339;2545;2556;3220;3633;3680;3703;4046;4088;4680;4681;4682;5354;5507;5510;5528;5902;5936;5937;5938;5946;6234;6258;6259;6413;6414;7189;7242	1432;1841;1939;2063;2064;2363;2649;2731;3045;3053;3054;3055;3513;3986;4000;5007;5618;5619;5683;5708;6192;6254;7189;7190;7191;8126;8321;8324;8345;8950;8951;8996;8997;8998;9069;9493;9494;9495;9496;9497;9525;9526;9710;9711;10840;10918	1508;1952;2055;2201;2202;2559;2860;2942;3261;3269;3270;3271;3793;4341;4355;5452;6119;6120;6186;6211;6719;6789;7813;7814;7815;8807;9005;9008;9029;9680;9681;9732;9733;9734;9829;10295;10296;10297;10298;10299;10300;10329;10330;10519;10520;11715;11796	1508;1952;2055;2202;2559;2860;2942;3261;3269;3793;4341;4355;5452;6120;6186;6211;6719;6789;7814;7815;8807;9005;9008;9029;9680;9732;9734;9829;10296;10330;10519;11715;11796	246;247;248;249;250;251	154;293;336;426;622;658
J3QS48;I3L295;J3KT75;J3QW43;J3QRD5;O75352-2;O75352;I3L1D2;J3KSI4;I3L4E0;J3KTK8;J3QQZ4;I3L405;I3L261	J3QS48;I3L295;J3KT75;J3QW43;J3QRD5;O75352-2;O75352;I3L1D2;J3KSI4;I3L4E0;J3KTK8;J3QQZ4;I3L405;I3L261	6;6;6;6;6;6;6;5;4;4;4;4;3;3	6;6;6;6;6;6;6;5;4;4;4;4;3;3	6;6;6;6;6;6;6;5;4;4;4;4;3;3	Mannose-P-dolichol utilization defect 1 protein	MPDU1	tr|J3QS48|J3QS48_HUMAN Mannose-P-dolichol utilization defect 1 protein OS=Homo sapiens OX=9606 GN=MPDU1 PE=1 SV=1;tr|I3L295|I3L295_HUMAN Mannose-P-dolichol utilization defect 1 isoform 2 OS=Homo sapiens OX=9606 GN=MPDU1 PE=1 SV=1;tr|J3KT75|J3KT75_HUMAN Man	14	6	6	6	51.5	51.5	51.5	10978	101	101;109;154;192;193;186;247;61;52;75;116;152;54;61	0	41626	1876000000	268000000	6				367	20;21;726;2200;3638;4985	True;True;True;True;True;True	21;22;782;2347;3854;5336	22;23;1176;3524;3525;5953;8102	22;23;1235;3804;3805;6477;8783	22;23;1235;3805;6477;8783
Q06830;A0A0A0MSI0;A0A0A0MRQ5;H7C3T4;Q13162	Q06830;A0A0A0MSI0;A0A0A0MRQ5	12;9;7;2;2	12;9;7;2;2	11;8;6;2;2	Peroxiredoxin-1	PRDX1	sp|Q06830|PRDX1_HUMAN Peroxiredoxin-1 OS=Homo sapiens OX=9606 GN=PRDX1 PE=1 SV=1;tr|A0A0A0MSI0|A0A0A0MSI0_HUMAN Peroxiredoxin-1 (Fragment) OS=Homo sapiens OX=9606 GN=PRDX1 PE=1 SV=1;tr|A0A0A0MRQ5|A0A0A0MRQ5_HUMAN Peroxiredoxin-1 OS=Homo sapiens OX=9606 GN=	5	12	12	11	60.8	60.8	55.3	2020-11-22	199	199;171;97;161;271	0	109.84	4680800000	260050000	15				735	109;517;898;2194;2440;2441;2708;3661;3946;4540;4793;5619	True;True;True;True;True;True;True;True;True;True;True;True	118;554;555;959;2341;2604;2605;2883;3880;4175;4875;5137;6009	185;843;844;1427;1428;3515;4061;4062;4558;4559;5987;5988;6369;7464;7465;7812;9178	190;879;880;1503;1504;3795;4417;4418;4984;4985;6511;6512;6907;8114;8115;8471;9959	190;880;1503;3795;4417;4418;4985;6511;6907;8115;8471;9959	387	21
Q9NYP7;Q9NYP7-2;A0A0A0MTI6;Q9NYP7-3;REV__O00453-5;REV__A6NCF5;REV__A0A1B0GTK0;REV__A0A1B0GUB7	Q9NYP7;Q9NYP7-2;A0A0A0MTI6;Q9NYP7-3	4;4;3;2;1;1;1;1	4;4;3;2;1;1;1;1	4;4;3;2;1;1;1;1	Elongation of very long chain fatty acids protein 5;Elongation of very long chain fatty acids protein	ELOVL5	sp|Q9NYP7|ELOV5_HUMAN Elongation of very long chain fatty acids protein 5 OS=Homo sapiens OX=9606 GN=ELOVL5 PE=1 SV=1;sp|Q9NYP7-2|ELOV5_HUMAN Isoform 2 of Elongation of very long chain fatty acids protein 5 OS=Homo sapiens OX=9606 GN=ELOVL5;tr|A0A0A0MTI6|A	8	4	4	4	2020-04-11	2020-04-11	2020-04-11	35293	299	299;326;262;88;59;533;623;797	0	32361	2839500000	258140000	8				1082	335;4055;4668;6730	True;True;True;True	362;4308;4309;5008;7192	540;6555;6556;6557;6558;6559;6560;7621;10843	560;7109;7110;7111;7112;7113;7114;8272;11718	560;7111;8272;11718	539	1
Q9Y3A6;B1AKT3;Q9Y3A6-2;M0R072	Q9Y3A6;B1AKT3;Q9Y3A6-2	9;5;5;3	9;5;5;3	9;5;5;3	Transmembrane emp24 domain-containing protein 5	TMED5	sp|Q9Y3A6|TMED5_HUMAN Transmembrane emp24 domain-containing protein 5 OS=Homo sapiens OX=9606 GN=TMED5 PE=1 SV=1;tr|B1AKT3|B1AKT3_HUMAN Transmembrane emp24 domain-containing protein 5 OS=Homo sapiens OX=9606 GN=TMED5 PE=1 SV=1;sp|Q9Y3A6-2|TMED5_HUMAN Isofo	4	9	9	9	49.3	49.3	49.3	26005	229	229;162;193;120	0	60923	3046100000	253850000	11				1131	488;1195;3285;4323;5058;5129;5700;6669;6670	True;True;True;True;True;True;True;True;True	525;1278;1279;3489;4642;5411;5493;6092;7128;7129	808;1888;1889;5395;7138;8191;8297;8298;9279;10773;10774	844;2002;2003;5861;7761;8872;8979;8980;10060;11647;11648	844;2002;5861;7761;8872;8979;10060;11647;11648	574;575	52;151
P46977;P46977-2;A0A0C4DH80;E9PN73;E9PI32;H0YET6	P46977;P46977-2	16;12;4;4;4;3	16;12;4;4;4;3	15;11;4;4;4;3	Dolichyl-diphosphooligosaccharide--protein glycosyltransferase subunit STT3A	STT3A	sp|P46977|STT3A_HUMAN Dolichyl-diphosphooligosaccharide--protein glycosyltransferase subunit STT3A OS=Homo sapiens OX=9606 GN=STT3A PE=1 SV=2;sp|P46977-2|STT3A_HUMAN Isoform 2 of Dolichyl-diphosphooligosaccharide--protein glycosyltransferase subunit STT3A	6	16	16	15	2020-06-21	2020-06-21	2020-07-20	80529	705	705;613;102;117;119;194	0	158.39	9860700000	246520000	29				644	745;1194;1327;1482;1757;1793;1804;1830;1880;2752;2953;3327;3685;4339;4340;6035	True;True;True;True;True;True;True;True;True;True;True;True;True;True;True;True	801;1277;1419;1590;1880;1919;1930;1957;2008;2009;2927;3141;3533;3906;4658;4659;6448;6449	1198;1199;1200;1201;1887;2243;2479;2830;2831;2875;2890;2891;2922;2982;2983;4609;4899;5468;5469;6018;7161;7162;7163;9753;9754;9755	1258;1259;1260;1261;1262;1263;2001;2437;2679;3042;3043;3087;3102;3103;3104;3136;3196;3197;5036;5344;5954;5955;6543;7785;7786;7787;10562;10563;10564	1258;2001;2437;2679;3043;3087;3103;3136;3197;5036;5344;5954;6543;7785;7787;10564	320;321	559;599
Q8N6L1;Q8N6L1-2	Q8N6L1;Q8N6L1-2	1;1	1;1	1;1	Keratinocyte-associated protein 2	KRTCAP2	sp|Q8N6L1|KTAP2_HUMAN Keratinocyte-associated protein 2 OS=Homo sapiens OX=9606 GN=KRTCAP2 PE=1 SV=2;sp|Q8N6L1-2|KTAP2_HUMAN Isoform 2 of Keratinocyte-associated protein 2 OS=Homo sapiens OX=9606 GN=KRTCAP2	2	1	1	1	2020-05-12	2020-05-12	2020-05-12	14678	136	136;162	0.0010846	86421	1230900000	246170000	2				882	2957	True	3145	4904;4905	5349;5350	5349
Q15800;D6RDP9;D6R952;Q15800-2;D6REA2	Q15800;D6RDP9;D6R952;Q15800-2	6;4;4;4;1	6;4;4;4;1	6;4;4;4;1	Methylsterol monooxygenase 1	MSMO1	sp|Q15800|MSMO1_HUMAN Methylsterol monooxygenase 1 OS=Homo sapiens OX=9606 GN=MSMO1 PE=1 SV=1;tr|D6RDP9|D6RDP9_HUMAN Methylsterol monooxygenase 1 (Fragment) OS=Homo sapiens OX=9606 GN=MSMO1 PE=1 SV=1;tr|D6R952|D6R952_HUMAN Methylsterol monooxygenase 1 OS=H	5	6	6	6	2020-04-30	2020-04-30	2020-04-30	35215	293	293;220;229;162;85	0	64418	1933800000	241720000	7				778	643;911;2692;3538;4243;6552	True;True;True;True;True;True	692;973;2867;3751;4557;4558;6997	1045;1446;4541;5817;6960;6961;10604	1099;1522;4967;6339;7553;7554;11471	1099;1522;4967;6339;7554;11471	413	40
Q3ZAQ7;Q3ZAQ7-2	Q3ZAQ7	3;1	3;1	3;1	Vacuolar ATPase assembly integral membrane protein VMA21	VMA21	sp|Q3ZAQ7|VMA21_HUMAN Vacuolar ATPase assembly integral membrane protein VMA21 OS=Homo sapiens OX=9606 GN=VMA21 PE=1 SV=1	2	3	3	3	2020-07-27	2020-07-27	2020-07-27	11354	101	101;156	0	19812	956770000	239190000	3				787	48;4068;4269	True;True;True	52;4326;4585	107;6578;7019	112;7133;7620	112;7133;7620
P63104;E7EX29;B0AZS6;E7ESK7;B7Z2E6;H0YB80;P63104-2;E5RIR4;E9PD24;E7EVZ2;E5RGE1	P63104;E7EX29;B0AZS6;E7ESK7	13;12;8;7;6;6;6;5;5;5;4	10;9;7;5;5;5;5;3;3;3;2	9;8;6;5;4;4;4;3;3;3;2	14-3-3 protein zeta/delta	YWHAZ	sp|P63104|1433Z_HUMAN 14-3-3 protein zeta/delta OS=Homo sapiens OX=9606 GN=YWHAZ PE=1 SV=1;tr|E7EX29|E7EX29_HUMAN 14-3-3 protein zeta/delta (Fragment) OS=Homo sapiens OX=9606 GN=YWHAZ PE=1 SV=1;tr|B0AZS6|B0AZS6_HUMAN cDNA, FLJ79516, highly similar to 14-3-	11	13	10	9	53.9	43.7	40	27745	245	245;246;168;137;125;130;170;75;92;98;51	0	140.7	5254800000	238860000	15				714	881;1067;1472;2177;2683;3164;4362;5439;5470;6424;6572;6677;6678	True;False;True;True;True;False;False;True;True;True;True;True;True	941;1139;1140;1578;1579;2323;2858;3365;4683;5817;5851;6864;7017;7018;7019;7136;7137	1406;1721;1722;1723;2466;2467;2468;3454;4531;5245;7192;8802;8875;8876;10430;10632;10633;10634;10783;10784	1482;1827;1828;1829;2666;2667;2668;3714;4957;5706;5707;7816;9520;9601;9602;11290;11504;11505;11506;11657;11658	1482;1827;2667;3714;4957;5707;7816;9520;9601;11290;11505;11657;11658	288;289;372;373	22;26;160;218
J3QRG5;J3KSJ5;Q9BQA9-2;Q9BQA9;J3KTF4;J3QRZ2;J3QLB7;J3QKS6;J3QS53;J3QKZ6;J3QQQ4;H0Y2X1;J3KTI1;J3KSB6;J3KS78	J3QRG5;J3KSJ5;Q9BQA9-2;Q9BQA9;J3KTF4;J3QRZ2;J3QLB7;J3QKS6;J3QS53	4;4;4;4;3;3;3;3;2;1;1;1;1;1;1	4;4;4;4;3;3;3;3;2;1;1;1;1;1;1	4;4;4;4;3;3;3;3;2;1;1;1;1;1;1	Uncharacterized protein C17orf62	C17orf62	tr|J3QRG5|J3QRG5_HUMAN Cytochrome b-245 chaperone 1 OS=Homo sapiens OX=9606 GN=CYBC1 PE=1 SV=1;tr|J3KSJ5|J3KSJ5_HUMAN Cytochrome b-245 chaperone 1 OS=Homo sapiens OX=9606 GN=CYBC1 PE=1 SV=1;sp|Q9BQA9-2|CYBC1_HUMAN Isoform 2 of Cytochrome b-245 chaperone 1	15	4	4	4	2020-01-31	2020-01-31	2020-01-31	16754	148	148;190;173;187;88;117;119;130;85;51;59;63;78;78;80	0	25717	2374000000	237400000	7				377	214;3217;3629;4226	True;True;True;True	232;3418;3419;3845;4537	335;336;5315;5316;5317;5941;6937	349;350;5781;5782;5783;6465;7530	350;5781;6465;7530	128;129	1;144
Q9NVV0;A0A0A0MRS4;H7C3B3;H7C4C1	Q9NVV0;A0A0A0MRS4	7;5;3;2	7;5;3;2	7;5;3;2	Trimeric intracellular cation channel type B	TMEM38B	sp|Q9NVV0|TM38B_HUMAN Trimeric intracellular cation channel type B OS=Homo sapiens OX=9606 GN=TMEM38B PE=1 SV=1;tr|A0A0A0MRS4|A0A0A0MRS4_HUMAN Transmembrane protein 38B, isoform CRA_b OS=Homo sapiens OX=9606 GN=TMEM38B PE=1 SV=1	4	7	7	7	35.1	35.1	35.1	32509	291	291;237;162;81	0	80297	3068800000	236060000	12				1074	2061;2996;4037;4643;5314;5776;6363	True;True;True;True;True;True;True	2202;3185;4282;4283;4983;5685;6173;6174;6794	3262;3263;4963;4964;6522;6523;7595;8629;9377;9378;9379;10309	3486;3487;5408;5409;7076;7077;8246;9339;10168;10169;10170;11157	3487;5409;7076;8246;9339;10170;11157	534;535	1;17
P09601;B1AHA8	P09601;B1AHA8	12;8	12;8	12;8	Heme oxygenase 1	HMOX1	sp|P09601|HMOX1_HUMAN Heme oxygenase 1 OS=Homo sapiens OX=9606 GN=HMOX1 PE=1 SV=1;tr|B1AHA8|B1AHA8_HUMAN Heme oxygenase 1 (Fragment) OS=Homo sapiens OX=9606 GN=HMOX1 PE=1 SV=1	2	12	12	12	60.4	60.4	60.4	32818	288	288;187	0	164.56	4658400000	232920000	21				544	45;310;1571;1631;4069;4152;5317;5473;5548;6288;6529;6695	True;True;True;True;True;True;True;True;True;True;True;True	49;336;1681;1745;1746;4327;4328;4444;4445;4446;5688;5854;5933;6716;6972;6973;7154	104;475;2590;2665;2666;2667;2668;6579;6580;6581;6816;6817;6818;8634;8879;8992;8993;10156;10554;10555;10803	109;493;2800;2876;2877;2878;2879;7134;7135;7136;7401;7402;7403;9345;9605;9728;9729;10992;11417;11418;11677	109;493;2800;2878;7136;7401;9345;9605;9729;10992;11418;11677	226;227;228;229;230;231	1;9;34;111;186;191
Q5HYB6;P06753-2;A0A087WWU8;Q5VU61;P06753-5;P06753-6;P06753-3;J3KN67;P06753-4;P06753-7;P06753;D6R904;P09493-5;H0YK48;A0A0S2Z4G6;H0YNC7;P09493;P09493-6;H0YKJ4;D6RFM2;H0YL80;H0YKP3;A0A2R8Y6A3	Q5HYB6;P06753-2;A0A087WWU8;Q5VU61;P06753-5;P06753-6;P06753-3;J3KN67;P06753-4	18;18;17;15;15;15;15;14;12;8;8;7;4;4;4;4;4;4;4;3;3;3;1	18;18;17;15;15;15;15;14;12;8;8;7;4;4;4;4;4;4;4;3;3;3;1	12;12;12;11;9;9;9;8;6;5;2;4;0;0;0;0;0;0;0;3;0;0;0	Tropomyosin alpha-3 chain	DKFZp686J1372;TPM3	tr|Q5HYB6|Q5HYB6_HUMAN Epididymis luminal protein 189 OS=Homo sapiens OX=9606 GN=TPM3 PE=1 SV=1;sp|P06753-2|TPM3_HUMAN Isoform 2 of Tropomyosin alpha-3 chain OS=Homo sapiens OX=9606 GN=TPM3;tr|A0A087WWU8|A0A087WWU8_HUMAN Tropomyosin alpha-3 chain OS=Homo s	23	18	18	12	63.4	63.4	44.4	27175	232	232;248;227;223;248;248;247;285;247;158;285;95;245;248;284;223;284;284;248;49;68;157;133	0	133.89	5347500000	232500000	20				536	217;682;1211;1250;1461;1519;2467;2915;2916;2925;2926;3214;3646;3921;3922;4114;5621;6595	True;True;True;True;True;True;True;True;True;True;True;True;True;True;True;True;True;True	235;733;1296;1337;1558;1627;2633;3102;3103;3112;3113;3415;3863;3864;4150;4151;4386;6011;7045	339;1098;1909;1959;2425;2518;4103;4104;4105;4846;4847;4848;4857;4858;5312;5967;5968;6337;6338;6652;9180;10669	353;1152;2023;2079;2623;2719;4459;4460;4461;4462;5291;5292;5293;5302;5303;5778;6491;6492;6875;6876;7209;9961;11541	353;1152;2023;2079;2623;2719;4460;5291;5293;5302;5303;5778;6492;6875;6876;7209;9961;11541	207;208	148;221
P60604-2;P60604	P60604-2;P60604	4;4	4;4	4;4	Ubiquitin-conjugating enzyme E2 G2	UBE2G2	sp|P60604-2|UB2G2_HUMAN Isoform 2 of Ubiquitin-conjugating enzyme E2 G2 OS=Homo sapiens OX=9606 GN=UBE2G2;sp|P60604|UB2G2_HUMAN Ubiquitin-conjugating enzyme E2 G2 OS=Homo sapiens OX=9606 GN=UBE2G2 PE=1 SV=1	2	4	4	4	51.1	51.1	51.1	15614	137	137;165	0	65817	1387300000	231220000	7				695	1952;2817;5925;6536	True;True;True;True	2087;2994;2995;6332;6333;6980	3092;3093;4716;4717;9614;9615;9616;10563	3309;3310;5156;5157;10421;10422;10423;11426	3310;5157;10423;11426	360;361	73;98
Q9BRR6-2;Q9BRR6;Q9BRR6-3;Q9BRR6-4;H3BRS6;Q9BRR6-5;H3BU35;H3BTH4;H3BN66;Q9BRR6-6	Q9BRR6-2;Q9BRR6;Q9BRR6-3;Q9BRR6-4	14;14;8;7;6;3;2;1;1;1	14;14;8;7;6;3;2;1;1;1	14;14;8;7;6;3;2;1;1;1	ADP-dependent glucokinase	ADPGK	sp|Q9BRR6-2|ADPGK_HUMAN Isoform 2 of ADP-dependent glucokinase OS=Homo sapiens OX=9606 GN=ADPGK;sp|Q9BRR6|ADPGK_HUMAN ADP-dependent glucokinase OS=Homo sapiens OX=9606 GN=ADPGK PE=1 SV=1;sp|Q9BRR6-3|ADPGK_HUMAN Isoform 3 of ADP-dependent glucokinase OS=Hom	10	14	14	14	40.9	40.9	40.9	53.96	496	496;497;258;222;204;347;154;57;113;78	0	155.73	5192500000	225760000	23				998	423;871;1312;1584;1679;3004;3005;3543;3596;4251;4659;5259;5822;5894	True;True;True;True;True;True;True;True;True;True;True;True;True;True	459;460;931;1404;1694;1797;3193;3194;3756;3809;4566;4567;4999;5625;6225;6300	702;703;704;705;1371;1372;2224;2604;2605;2727;4973;4974;4975;5826;5898;6970;6971;6972;7612;8563;8564;9483;9574	732;733;734;735;1440;1441;2417;2814;2815;2938;5418;5419;5420;6348;6422;7563;7564;7565;8263;9273;9274;10283;10380	733;1440;2417;2814;2938;5418;5420;6348;6422;7564;8263;9273;10283;10380	496;497	123;433
Q5HYI8;C9JXM3;F8WF50;F8WDC7;H7C533;F8WAX9	Q5HYI8;C9JXM3	11;9;4;4;2;2	11;9;4;4;2;2	11;9;4;4;2;2	Rab-like protein 3	RABL3	sp|Q5HYI8|RABL3_HUMAN Rab-like protein 3 OS=Homo sapiens OX=9606 GN=RABL3 PE=1 SV=1;tr|C9JXM3|C9JXM3_HUMAN Rab-like protein 3 OS=Homo sapiens OX=9606 GN=RABL3 PE=1 SV=1	6	11	11	11	55.1	55.1	55.1	26422	236	236;212;129;135;53;53	0	112.14	3559700000	222480000	12				798	568;1319;1773;2431;3266;3267;5364;5472;6201;6534;6674	True;True;True;True;True;True;True;True;True;True;True	612;1411;1897;2595;3470;3471;5737;5853;6622;6978;7133	952;953;2233;2852;4049;5373;5374;8694;8878;10033;10561;10780	1004;1005;2426;3064;4405;5839;5840;9405;9604;10866;11424;11654	1005;2426;3064;4405;5839;5840;9405;9604;10866;11424;11654
A0A087WU53;Q9H0U3;Q9H0U3-2	A0A087WU53;Q9H0U3	9;9;4	9;9;4	9;9;4	Magnesium transporter protein 1	MAGT1	tr|A0A087WU53|A0A087WU53_HUMAN Magnesium transporter protein 1 OS=Homo sapiens OX=9606 GN=MAGT1 PE=1 SV=1;sp|Q9H0U3|MAGT1_HUMAN Magnesium transporter protein 1 OS=Homo sapiens OX=9606 GN=MAGT1 PE=1 SV=1	3	9	9	9	2020-09-22	2020-09-22	2020-09-22	41531	367	367;335;134	0	109.71	4562500000	217260000	10				9	1475;2109;4678;4972;5286;5533;6330;6648;6779	True;True;True;True;True;True;True;True;True	1583;2252;5018;5322;5656;5916;6761;7101;7102;7244	2472;3348;7633;8085;8597;8975;10250;10737;10738;10921	2672;3592;8284;8766;9307;9711;11090;11609;11610;11799	2672;3592;8284;8766;9307;9711;11090;11609;11799	1;2;3;4	67;77;242;366
Q9Y394;A0A087X0Z7;H0YJ66;Q9Y394-2;H0YJR8;H0YJE4;G3V5J0	Q9Y394;A0A087X0Z7;H0YJ66;Q9Y394-2;H0YJR8	14;13;13;13;8;5;1	14;13;13;13;8;5;1	14;13;13;13;8;5;1	Dehydrogenase/reductase SDR family member 7	DHRS7	sp|Q9Y394|DHRS7_HUMAN Dehydrogenase/reductase SDR family member 7 OS=Homo sapiens OX=9606 GN=DHRS7 PE=1 SV=1;tr|A0A087X0Z7|A0A087X0Z7_HUMAN Dehydrogenase/reductase SDR family member 7 OS=Homo sapiens OX=9606 GN=DHRS7 PE=1 SV=1;tr|H0YJ66|H0YJ66_HUMAN Dehydr	7	14	14	14	54.9	54.9	54.9	38298	339	339;376;399;289;212;160;61	0	130.56	4202300000	210120000	23				1130	113;577;671;722;891;2099;2658;3020;3453;3652;5143;5187;5188;5546	True;True;True;True;True;True;True;True;True;True;True;True;True;True	122;622;722;777;778;951;2242;2832;2833;3211;3665;3870;3871;5508;5553;5554;5931	189;966;1085;1159;1160;1161;1418;1419;3338;4496;4497;4995;4996;5663;5664;5665;5975;5976;8322;8386;8387;8388;8990	194;1018;1139;1216;1217;1218;1494;1495;3582;4920;4921;5440;5441;6166;6167;6168;6499;6500;9006;9075;9076;9077;9726	194;1018;1139;1217;1495;3582;4921;5441;6166;6499;9006;9075;9077;9726	570;571;572;573	141;148;177;273
Q12907;D6RBV2;D6RDX1;D6RIU4;D6RBH1	Q12907;D6RBV2;D6RDX1;D6RIU4	11;10;9;6;5	11;10;9;6;5	11;10;9;6;5	Vesicular integral-membrane protein VIP36	LMAN2	sp|Q12907|LMAN2_HUMAN Vesicular integral-membrane protein VIP36 OS=Homo sapiens OX=9606 GN=LMAN2 PE=1 SV=1;tr|D6RBV2|D6RBV2_HUMAN Vesicular integral-membrane protein VIP36 OS=Homo sapiens OX=9606 GN=LMAN2 PE=1 SV=1;tr|D6RDX1|D6RDX1_HUMAN Vesicular integral	5	11	11	11	46.9	46.9	46.9	40228	356	356;325;288;191;203	0	183.85	4528400000	205840000	16				745	967;985;1122;1326;1350;3346;3728;3898;4351;4670;6540	True;True;True;True;True;True;True;True;True;True;True	1034;1055;1199;1418;1443;3554;3949;3950;4126;4127;4671;5010;6984	1599;1622;1798;2241;2242;2275;5519;5520;6074;6075;6308;6309;7179;7180;7623;10571	1701;1724;1908;2435;2436;2469;6018;6019;6600;6601;6845;6846;7803;7804;8274;11435	1701;1724;1908;2436;2469;6019;6601;6846;7804;8274;11435	388;389	227;271
Q8WUY8;M0R1E3;M0QZH3	Q8WUY8;M0R1E3	4;3;1	4;3;1	4;3;1	N-acetyltransferase 14	NAT14	sp|Q8WUY8|NAT14_HUMAN N-acetyltransferase 14 OS=Homo sapiens OX=9606 GN=NAT14 PE=1 SV=1;tr|M0R1E3|M0R1E3_HUMAN N-acetyltransferase 14 (Fragment) OS=Homo sapiens OX=9606 GN=NAT14 PE=1 SV=1	3	4	4	4	2020-02-27	2020-02-27	2020-02-27	21.65	206	206;173;52	0	38.64	2197200000	199750000	4				921	426;2297;3511;6505	True;True;True;True	463;2453;3724;6946	709;3760;5735;10526	739;4083;6238;11389	739;4083;6238;11389
Q9NWW5;Q9NWW5-2;H3BUT1;A0A0S2Z5D0;H3BUV4;A0A1B0GUD2;A0A1B0GU90;H3BNF1;A0A1B0GTV3;H3BTY4;A0A1B0GTU6;A0A1B0GW73;A0A1B0GTD3	Q9NWW5;Q9NWW5-2;H3BUT1;A0A0S2Z5D0;H3BUV4;A0A1B0GUD2	5;5;4;3;3;3;2;2;2;2;2;1;1	5;5;4;3;3;3;2;2;2;2;2;1;1	5;5;4;3;3;3;2;2;2;2;2;1;1	Ceroid-lipofuscinosis neuronal protein 6	CLN6	sp|Q9NWW5|CLN6_HUMAN Ceroid-lipofuscinosis neuronal protein 6 OS=Homo sapiens OX=9606 GN=CLN6 PE=1 SV=1;sp|Q9NWW5-2|CLN6_HUMAN Isoform 2 of Ceroid-lipofuscinosis neuronal protein 6 OS=Homo sapiens OX=9606 GN=CLN6;tr|H3BUT1|H3BUT1_HUMAN Ceroid-lipofuscinosi	13	5	5	5	2020-05-21	2020-05-21	2020-05-21	35919	311	311;343;248;171;213;215;76;105;108;158;251;77;86	0	46908	1983200000	198320000	9				1077	2453;3146;3546;4634;6741	True;True;True;True;True	2619;3347;3759;4974;7204	4081;4082;4083;5224;5829;5830;5831;7585;10858	4437;4438;4439;5685;6352;6353;6354;8236;11733	4437;5685;6354;8236;11733
Q96S52;Q96S52-2;K7EN97	Q96S52;Q96S52-2	15;14;1	15;14;1	15;14;1	GPI transamidase component PIG-S	PIGS	sp|Q96S52|PIGS_HUMAN GPI transamidase component PIG-S OS=Homo sapiens OX=9606 GN=PIGS PE=1 SV=3;sp|Q96S52-2|PIGS_HUMAN Isoform 2 of GPI transamidase component PIG-S OS=Homo sapiens OX=9606 GN=PIGS	3	15	15	15	43.4	43.4	43.4	61655	555	555;547;116	0	192.41	5915400000	197180000	22				980	10;491;678;837;1729;2694;3015;3417;3545;3660;3708;5147;5418;6217;6502	True;True;True;True;True;True;True;True;True;True;True;True;True;True;True	10;11;528;729;895;1849;2869;3206;3628;3758;3879;3929;5512;5795;6640;6943	10;11;12;811;1094;1330;1331;2792;4543;4988;5612;5828;5986;6049;6050;8326;8327;8774;8775;10056;10523	10;11;12;847;1148;1398;1399;3004;4969;5433;6113;6350;6351;6510;6575;6576;9010;9011;9492;9493;10890;11386	11;847;1148;1399;3004;4969;5433;6113;6351;6510;6576;9010;9493;10890;11386	491;492	360;386
Q5JP53;P07437;Q5ST81;A6NNZ2	Q5JP53;P07437;Q5ST81	18;18;16;7	4;4;2;0	3;3;2;0	Tubulin beta chain	TUBB	tr|Q5JP53|Q5JP53_HUMAN Tubulin beta chain OS=Homo sapiens OX=9606 GN=TUBB PE=1 SV=1;sp|P07437|TBB5_HUMAN Tubulin beta chain OS=Homo sapiens OX=9606 GN=TUBB PE=1 SV=2;tr|Q5ST81|Q5ST81_HUMAN Tubulin beta chain OS=Homo sapiens OX=9606 GN=TUBB PE=1 SV=1	4	18	4	3	49.5	2020-04-17	2020-08-13	47766	426	426;444;372;444	0	54592	4140000000	197140000	9				539	272;367;1615;1902;1903;1985;2153;2154;2852;2931;2941;3225;3431;4020;4384;4448;5502;6713	True;True;False;False;False;True;False;False;False;False;False;False;False;True;False;False;False;False	295;296;397;1727;1728;2035;2036;2123;2298;2299;3033;3034;3119;3129;3428;3429;3642;3643;4260;4261;4708;4709;4710;4780;5885;7172	424;425;583;584;2644;2645;3024;3025;3164;3165;3418;3419;3420;4769;4770;4865;4885;5326;5327;5328;5633;5634;5635;6495;6496;6497;7221;7222;7223;7224;7336;7337;8929;8930;10821;10822;10823	442;443;603;604;2855;2856;3240;3241;3386;3387;3677;3678;3679;3680;5212;5213;5310;5330;5792;5793;5794;6135;6136;6137;7048;7049;7050;7845;7846;7847;7848;7978;7979;9657;9658;9659;11696;11697;11698	442;603;2856;3240;3241;3386;3679;3680;5213;5310;5330;5793;6137;7048;7847;7978;9658;11697	17;19;20;21;22;211;212;213	55;146;239;249;281;282;312;345
Q9BW60;Q9BW60-2	Q9BW60;Q9BW60-2	5;4	5;4	5;4	Elongation of very long chain fatty acids protein 1	ELOVL1	sp|Q9BW60|ELOV1_HUMAN Elongation of very long chain fatty acids protein 1 OS=Homo sapiens OX=9606 GN=ELOVL1 PE=1 SV=1;sp|Q9BW60-2|ELOV1_HUMAN Isoform 2 of Elongation of very long chain fatty acids protein 1 OS=Homo sapiens OX=9606 GN=ELOVL1	2	5	5	5	2020-09-21	2020-09-21	2020-09-21	32662	279	279;252	0	55.31	1907400000	190740000	7				1021	353;637;1810;4044;5919	True;True;True;True;True	380;686;1936;4292;4293;6325	563;564;1038;2898;6532;6533;6534;9607	583;584;1092;3111;7086;7087;7088;10414	583;1092;3111;7087;10414	506;507	1;12
E5RG44;E5RIT1;E5RGJ1;Q629K1	E5RG44;E5RIT1;E5RGJ1;Q629K1	2;2;2;2	2;2;2;2	2;2;2;2	Triple QxxK/R motif-containing protein	TRIQK	tr|E5RG44|E5RG44_HUMAN Triple QxxK/R motif-containing protein OS=Homo sapiens OX=9606 GN=TRIQK PE=1 SV=1;tr|E5RIT1|E5RIT1_HUMAN Triple QxxK/R motif-containing protein (Fragment) OS=Homo sapiens OX=9606 GN=TRIQK PE=1 SV=1;tr|E5RGJ1|E5RGJ1_HUMAN Triple QxxK/	4	2	2	2	2020-08-14	2020-08-14	2020-08-14	60772	54	54;75;80;86	0	11764	762730000	190680000	3				229	3730;3731	True;True	3952;3953	6077;6078;6079	6603;6604;6605	6603;6604
Q9H3H5-2;Q9H3H5;A0A1W2PPC6;Q9H3H5-3;F8W681;A0A1W2PQD1;F8WE55;A0A1W2PRR6;A0A1W2PQH0;H7C2L6	Q9H3H5-2;Q9H3H5;A0A1W2PPC6;Q9H3H5-3	5;5;4;3;2;2;2;2;1;1	5;5;4;3;2;2;2;2;1;1	5;5;4;3;2;2;2;2;1;1	UDP-N-acetylglucosamine--dolichyl-phosphate N-acetylglucosaminephosphotransferase	DPAGT1	sp|Q9H3H5-2|GPT_HUMAN Isoform 2 of UDP-N-acetylglucosamine--dolichyl-phosphate N-acetylglucosaminephosphotransferase OS=Homo sapiens OX=9606 GN=DPAGT1;sp|Q9H3H5|GPT_HUMAN UDP-N-acetylglucosamine--dolichyl-phosphate N-acetylglucosaminephosphotransferase OS=	10	5	5	5	2020-05-15	2020-05-15	2020-05-15	45127	400	400;408;377;301;57;69;95;102;173;226	0	30153	2469900000	189990000	6				1035	2145;3232;3573;5244;6143	True;True;True;True;True	2290;3436;3786;5610;6562	3408;5335;5873;5874;8545;9901	3667;5801;6397;6398;9255;10713	3667;5801;6398;9255;10713
P55072;C9IZA5;C9JUP7	P55072	34;5;4	34;5;4	34;5;4	Transitional endoplasmic reticulum ATPase	VCP	sp|P55072|TERA_HUMAN Transitional endoplasmic reticulum ATPase OS=Homo sapiens OX=9606 GN=VCP PE=1 SV=4	3	34	34	34	53.8	53.8	53.8	89321	806	806;160;115	0	323.31	10260000000	186550000	44				683	259;863;1096;1433;1474;1565;1608;1616;1789;2043;2104;2131;2260;2531;2736;3018;3156;3170;3171;3268;3302;3373;3499;4027;4195;4235;4664;4675;4797;4893;4957;5435;6393;6479	True;True;True;True;True;True;True;True;True;True;True;True;True;True;True;True;True;True;True;True;True;True;True;True;True;True;True;True;True;True;True;True;True;True	280;922;923;1172;1529;1581;1582;1675;1720;1729;1914;1915;2183;2247;2275;2413;2699;2911;3209;3357;3371;3372;3472;3507;3582;3711;4271;4272;4498;4546;5004;5015;5141;5238;5304;5813;6826;6920	405;1361;1362;1766;2384;2385;2470;2471;2584;2636;2637;2646;2870;2871;3233;3343;3372;3631;4241;4590;4991;5237;5251;5252;5253;5375;5418;5419;5554;5719;6510;6511;6875;6947;6948;7617;7628;7629;7816;7958;8055;8798;10346;10500	423;1429;1430;1876;2580;2581;2670;2671;2794;2847;2848;2857;3082;3083;3455;3587;3616;3929;4625;5016;5436;5698;5714;5715;5716;5841;5884;5885;6053;6222;7063;7064;7461;7540;7541;8268;8279;8280;8475;8635;8735;9516;11196;11363	423;1430;1876;2581;2671;2794;2847;2857;3082;3455;3587;3616;3929;4625;5016;5436;5698;5714;5716;5841;5884;6053;6222;7064;7461;7540;8268;8279;8475;8635;8735;9516;11196;11363	353;354;355;356;357	46;219;508;550;740
Q8WY22;REV__Q96PE2;Q2M1P5	Q8WY22	5;1;1	5;1;1	5;1;1	BRI3-binding protein	BRI3BP	sp|Q8WY22|BRI3B_HUMAN BRI3-binding protein OS=Homo sapiens OX=9606 GN=BRI3BP PE=1 SV=1	3	5	5	5	31.9	31.9	31.9	27835	251	251;2063;1343	0	45112	2210700000	184220000	6				928	3301;5366;5839;6137;6447	True;True;True;True;True	3506;5739;6242;6556;6887	5417;8696;9506;9507;9893;10456;10457	5883;9407;10310;10311;10704;11316;11317	5883;9407;10311;10704;11317
B7ZAQ6-2;B7ZAQ6-3;P0CG08;B7ZAQ6;U3KPV2;E9PKY3;A0A087WW82;A0A087WW78	B7ZAQ6-2;B7ZAQ6-3;P0CG08;B7ZAQ6	10;10;10;10;4;4;3;2	10;10;10;10;4;4;3;2	10;10;10;10;4;4;3;2	Golgi pH regulator A;Golgi pH regulator B	GPR89A;GPR89B	sp|B7ZAQ6-2|GPHRA_HUMAN Isoform 2 of Golgi pH regulator A OS=Homo sapiens OX=9606 GN=GPR89A;sp|B7ZAQ6-3|GPHRA_HUMAN Isoform 3 of Golgi pH regulator A OS=Homo sapiens OX=9606 GN=GPR89A;sp|P0CG08|GPHRB_HUMAN Golgi pH regulator B OS=Homo sapiens OX=9606 GN=GP	8	10	10	10	36.7	36.7	36.7	38484	335	335;430;455;455;216;229;128;93	0	130.19	4504900000	180200000	16				157	1548;2212;2446;3371;3609;4181;4626;4812;5441;5630	True;True;True;True;True;True;True;True;True;True	1657;2360;2611;3580;3823;3824;4482;4965;4966;5156;5819;6020	2555;2556;3540;4070;4071;5552;5916;5917;6857;6858;7576;7577;7832;8804;8805;9191	2757;2758;3820;4426;4427;6051;6440;6441;7443;7444;8227;8228;8492;9522;9523;9972	2758;3820;4426;6051;6441;7443;8228;8492;9523;9972	55;56;57;58	79;110;280;282
U3KPU7;U3KQS2;O43826;O43826-2;U3KQL4	U3KPU7;U3KQS2;O43826;O43826-2;U3KQL4	8;8;8;8;4	8;8;8;8;4	8;8;8;8;4	Glucose-6-phosphate translocase	SLC37A4	tr|U3KPU7|U3KPU7_HUMAN Glucose-6-phosphate exchanger SLC37A4 OS=Homo sapiens OX=9606 GN=SLC37A4 PE=1 SV=2;tr|U3KQS2|U3KQS2_HUMAN Glucose-6-phosphate exchanger SLC37A4 OS=Homo sapiens OX=9606 GN=SLC37A4 PE=1 SV=2;sp|O43826|G6PT1_HUMAN Glucose-6-phosphate ex	5	8	8	8	2020-09-28	2020-09-28	2020-09-28	46443	429	429;451;429;451;356	0	114.49	2140200000	178350000	14				462	68;223;789;1977;2288;4344;5508;5571	True;True;True;True;True;True;True;True	74;241;846;2115;2444;4663;4664;5891;5958;5959	136;345;1266;3153;3747;3748;7168;7169;7170;7171;8939;9107;9108	141;359;1331;1332;3375;4069;4070;7792;7793;7794;7795;9669;9881;9882;9883	141;359;1331;3375;4070;7794;9669;9882	172;173	35;202
P61106;X6RFL8	P61106;X6RFL8	10;8	10;8	10;8	Ras-related protein Rab-14	RAB14	sp|P61106|RAB14_HUMAN Ras-related protein Rab-14 OS=Homo sapiens OX=9606 GN=RAB14 PE=1 SV=4;tr|X6RFL8|X6RFL8_HUMAN Ras-related protein Rab-14 (Fragment) OS=Homo sapiens OX=9606 GN=RAB14 PE=1 SV=1	2	10	10	10	59.1	59.1	59.1	23897	215	215;181	0	137.47	3031300000	178310000	12				701	118;515;1119;1881;3033;3889;4376;5040;5408;5586	True;True;True;True;True;True;True;True;True;True	128;552;1196;2010;2011;3225;4117;4698;5392;5785;5974	210;841;1795;2984;2985;2986;5014;6297;7208;8171;8763;8764;9132	220;877;1905;3198;3199;3200;5459;6833;7832;8852;9481;9482;9908	220;877;1905;3200;5459;6833;7832;8852;9482;9908	366	37
P21796;C9JI87	P21796;C9JI87	10;5	10;5	10;5	Voltage-dependent anion-selective channel protein 1	VDAC1	sp|P21796|VDAC1_HUMAN Voltage-dependent anion-selective channel protein 1 OS=Homo sapiens OX=9606 GN=VDAC1 PE=1 SV=2;tr|C9JI87|C9JI87_HUMAN Voltage-dependent anion-selective channel protein 1 (Fragment) OS=Homo sapiens OX=9606 GN=VDAC1 PE=1 SV=6	2	10	10	10	44.9	44.9	44.9	30772	283	283;183	0	100.26	3351300000	176380000	11				585	3864;3878;5520;6242;6243;6355;6372;6527;6541;6758	True;True;True;True;True;True;True;True;True;True	4090;4105;5903;6668;6669;6786;6805;6970;6985;7222	6256;6273;6274;8952;10091;10092;10300;10323;10552;10572;10891	6791;6808;6809;9682;10925;10926;11148;11171;11415;11436;11768	6791;6808;9682;10925;10926;11148;11171;11415;11436;11768
C9JA28;Q9UNL2;Q9UNL2-2	C9JA28;Q9UNL2;Q9UNL2-2	1;1;1	1;1;1	1;1;1	Translocon-associated protein subunit gamma	SSR3	tr|C9JA28|C9JA28_HUMAN Translocon-associated protein subunit gamma OS=Homo sapiens OX=9606 GN=SSR3 PE=1 SV=1;sp|Q9UNL2|SSRG_HUMAN Translocon-associated protein subunit gamma OS=Homo sapiens OX=9606 GN=SSR3 PE=1 SV=1;sp|Q9UNL2-2|SSRG_HUMAN Isoform 2 of Tran	3	1	1	1	8	8	8	20161	174	174;185;198	0.0011062	95785	1173000000	167570000	2				169	4875	True	5220	7934;7935	8610;8611	8611
P37268;E9PNM1;A0A1W2PQ47;P37268-3;P37268-2;P37268-5;P37268-4;E9PJG4;E9PS69;E9PQ90;E9PNJ2;E9PSH1	P37268;E9PNM1;A0A1W2PQ47;P37268-3;P37268-2;P37268-5;P37268-4	18;17;16;14;14;14;13;6;4;1;1;1	18;17;16;14;14;14;13;6;4;1;1;1	18;17;16;14;14;14;13;6;4;1;1;1	Squalene synthase	FDFT1	sp|P37268|FDFT_HUMAN Squalene synthase OS=Homo sapiens OX=9606 GN=FDFT1 PE=1 SV=1;tr|E9PNM1|E9PNM1_HUMAN Squalene synthase OS=Homo sapiens OX=9606 GN=FDFT1 PE=1 SV=1;tr|A0A1W2PQ47|A0A1W2PQ47_HUMAN Squalene synthase OS=Homo sapiens OX=9606 GN=FDFT1 PE=1 SV=	12	18	18	18	57.3	57.3	57.3	48115	417	417;410;476;332;353;374;306;150;113;45;51;67	0	182.02	4393400000	162720000	21				631	269;402;672;1047;1131;1292;2279;2587;2882;3349;4035;4089;4430;4780;5110;6263;6566;6704	True;True;True;True;True;True;True;True;True;True;True;True;True;True;True;True;True;True	291;436;437;723;1119;1209;1384;2432;2433;2758;3068;3557;4280;4352;4759;5123;5472;5473;6689;7011;7163	418;419;673;674;1086;1698;1808;2081;3731;3732;4318;4807;5523;6520;6615;7285;7765;8268;8269;8270;10115;10620;10812	436;437;703;704;1140;1804;1918;2219;4052;4053;4704;5251;6022;7074;7171;7913;8419;8950;8951;8952;10950;11488;11686	437;703;1140;1804;1918;2219;4053;4704;5251;6022;7074;7171;7913;8419;8950;10950;11488;11686	312;313;314	65;207;331
A0A087WVA1;P62341;Q6IAK0;F8WBD0	A0A087WVA1;P62341;Q6IAK0	4;4;2;1	4;4;2;1	4;4;2;1	Selenoprotein T	SELT	tr|A0A087WVA1|A0A087WVA1_HUMAN Selenoprotein T OS=Homo sapiens OX=9606 GN=SELENOT PE=1 SV=1;sp|P62341|SELT_HUMAN Thioredoxin reductase-like selenoprotein T OS=Homo sapiens OX=9606 GN=SELENOT PE=1 SV=2;tr|Q6IAK0|Q6IAK0_HUMAN Selenoprotein T OS=Homo sapiens	4	4	4	4	2020-06-25	2020-06-25	2020-06-25	22344	195	195;195;137;45	0	58093	2105600000	161970000	7				14	3317;3693;4172;5993	True;True;True;True	3523;3914;4472;6402	5455;5456;6029;6030;6031;6847;9696	5939;5940;6554;6555;6556;7433;10505	5940;6556;7433;10505	7;8	33;59
P20340-2;P20340;P20340-3;P20340-4;F5H3K7;F5GX61;J3KR73;C9JB90;C9J0I2;C9JU14;Q53S08;Q14964;Q9H0N0	P20340-2;P20340;P20340-3;P20340-4;F5H3K7;F5GX61	8;8;5;5;4;4;3;2;2;2;1;1;1	8;8;5;5;4;4;3;2;2;2;1;1;1	3;3;2;2;2;1;0;0;0;0;0;0;0	Ras-related protein Rab-6A	RAB6A	sp|P20340-2|RAB6A_HUMAN Isoform 2 of Ras-related protein Rab-6A OS=Homo sapiens OX=9606 GN=RAB6A;sp|P20340|RAB6A_HUMAN Ras-related protein Rab-6A OS=Homo sapiens OX=9606 GN=RAB6A PE=1 SV=3;sp|P20340-3|RAB6A_HUMAN Isoform 3 of Ras-related protein Rab-6A OS=	13	8	8	3	40.9	40.9	2020-03-18	23548	208	208;208;104;175;71;87;124;49;71;83;254;217;254	0	63641	2748900000	161700000	11				583	1431;2294;3763;3912;5384;5712;5772;5876	True;True;True;True;True;True;True;True	1527;2450;3985;4141;5758;6105;6106;6169;6280;6281	2382;3756;3757;6119;6120;6326;8730;9292;9293;9373;9549;9550	2578;4079;4080;6645;6646;6863;9448;10073;10074;10164;10355;10356	2578;4080;6646;6863;9448;10073;10164;10356	281;282	55;177
P60709;P63261;A0A2R8Y793;I3L3I0;I3L1U9;I3L4N8;G5E9R0;E7EVS6;Q6S8J3;A5A3E0;P63267-2;J3KT65;A0A2R8YGF8;I3L3R2;K7EM38;P0CG38;A0A2R8YEA7;C9JZR7;C9JUM1;Q9BYX7;Q562R1;C9JTX5;A0A2R8YFE2;P0CG39;F8WCH0	P60709;P63261;A0A2R8Y793;I3L3I0;I3L1U9	13;13;10;8;8;6;5;5;5;5;5;5;5;5;5;4;4;4;4;4;4;3;3;3;1	13;13;10;8;8;6;5;5;5;5;5;5;5;5;5;4;4;4;4;4;4;3;3;3;1	5;5;4;3;3;3;1;1;1;1;0;1;1;1;1;1;2;0;0;1;0;0;1;1;0	Actin, cytoplasmic 1;Actin, cytoplasmic 1, N-terminally processed;Actin, cytoplasmic 2;Actin, cytoplasmic 2, N-terminally processed	ACTB;ACTG1	sp|P60709|ACTB_HUMAN Actin, cytoplasmic 1 OS=Homo sapiens OX=9606 GN=ACTB PE=1 SV=1;sp|P63261|ACTG_HUMAN Actin, cytoplasmic 2 OS=Homo sapiens OX=9606 GN=ACTG1 PE=1 SV=1;tr|A0A2R8Y793|A0A2R8Y793_HUMAN Actin, cytoplasmic 1 (Fragment) OS=Homo sapiens OX=9606	25	13	13	5	46.4	46.4	2020-05-24	41736	375	375;375;309;214;214;241;125;163;1075;1075;333;198;165;164;133;1075;157;102;96;375;376;80;79;1038;52	0	125.95	3880700000	161700000	20				696	565;954;1070;1377;2398;2545;2742;3023;3256;4740;5453;5793;5909	True;True;True;True;True;True;True;True;True;True;True;True;True	609;1018;1143;1470;1471;2561;2713;2714;2715;2917;3215;3460;5080;5832;6193;6315	948;1566;1726;2310;2311;4005;4257;4258;4259;4260;4261;4599;5001;5002;5363;7711;8827;9407;9408;9592;9593	1000;1663;1832;2504;2505;4360;4642;4643;4644;4645;4646;5026;5446;5447;5829;8363;9549;10200;10201;10398;10399	1000;1663;1832;2505;4360;4646;5026;5446;5829;8363;9549;10201;10399	362;363;364	44;47;325
P22234;E9PBS1;P22234-2;D6RF62	P22234;E9PBS1;P22234-2;D6RF62	18;17;17;13	18;17;17;13	18;17;17;13	Multifunctional protein ADE2;Phosphoribosylaminoimidazole-succinocarboxamide synthase;Phosphoribosylaminoimidazole carboxylase	PAICS	sp|P22234|PUR6_HUMAN Multifunctional protein ADE2 OS=Homo sapiens OX=9606 GN=PAICS PE=1 SV=3;tr|E9PBS1|E9PBS1_HUMAN Multifunctional protein ADE2 (Fragment) OS=Homo sapiens OX=9606 GN=PAICS PE=1 SV=1;sp|P22234-2|PUR6_HUMAN Isoform 2 of Multifunctional prote	4	18	18	18	64.2	64.2	64.2	47079	425	425;413;432;333	0	172.05	4840800000	161360000	21				588	90;165;484;513;650;775;1025;1381;1647;1655;2632;2983;3726;3975;4276;5280;5448;6432	True;True;True;True;True;True;True;True;True;True;True;True;True;True;True;True;True;True	97;180;521;550;700;832;1096;1475;1763;1771;2806;3171;3947;4206;4592;5650;5826;5827;6872	163;273;802;837;838;1055;1242;1670;2317;2686;2698;4463;4941;4942;6071;6408;7026;8590;8821;8822;10438;10439	168;287;838;873;874;1109;1306;1773;2511;2897;2909;4884;5386;5387;6597;6947;7627;9300;9543;9544;11298;11299	168;287;838;873;1109;1306;1773;2511;2897;2909;4884;5386;6597;6947;7627;9300;9544;11299	285;286	190;244
P11021	P11021	21	20	20	78 kDa glucose-regulated protein	HSPA5	sp|P11021|BIP_HUMAN Endoplasmic reticulum chaperone BiP OS=Homo sapiens OX=9606 GN=HSPA5 PE=1 SV=2	1	21	20	20	40.2	37.8	37.8	72332	654	654	0	266.04	6729300000	160220000	29				549	969;1395;1739;2677;2687;2765;2975;2979;3123;3982;3983;4262;4428;4666;5321;5556;5653;6129;6214;6357;6454	True;True;True;True;True;False;True;True;True;True;True;True;True;True;True;True;True;True;True;True;True	1036;1489;1860;1861;2852;2862;2940;3163;3167;3320;4214;4215;4578;4757;5006;5692;5943;6043;6548;6636;6637;6788;6894	1601;1602;2332;2808;2809;4524;4535;4536;4639;4640;4930;4936;5186;5187;6421;6422;7012;7282;7619;8639;9056;9217;9884;10051;10052;10053;10302;10303;10466;10467	1703;1704;2526;3020;3021;4950;4961;4962;5077;5078;5375;5381;5647;5648;6960;6961;6962;7613;7910;8270;9350;9814;9998;10695;10885;10886;10887;11150;11151;11326;11327	1704;2526;3021;4950;4962;5077;5375;5381;5648;6960;6961;7613;7910;8270;9350;9814;9998;10695;10885;11151;11327	237;238	263;332
O14681;O14681-3;E9PM05;E9PS58;E9PK61;B7ZB74;E9PL33;E9PLB8;E9PQN7;A0A087WV44	O14681;O14681-3;E9PM05;E9PS58;E9PK61	9;8;5;5;5;4;3;2;1;1	9;8;5;5;5;4;3;2;1;1	9;8;5;5;5;4;3;2;1;1	Etoposide-induced protein 2.4 homolog	EI24	sp|O14681|EI24_HUMAN Etoposide-induced protein 2.4 homolog OS=Homo sapiens OX=9606 GN=EI24 PE=1 SV=4;sp|O14681-3|EI24_HUMAN Isoform 2 of Etoposide-induced protein 2.4 homolog OS=Homo sapiens OX=9606 GN=EI24;tr|E9PM05|E9PM05_HUMAN Etoposide-induced protein	10	9	9	9	2020-07-29	2020-07-29	2020-07-29	38964	340	340;326;187;217;262;167;125;91;14;41	0	74886	2714300000	159660000	11				429	621;1057;1908;2163;3117;5565;5857;6000;6410	True;True;True;True;True;True;True;True;True	670;1129;2041;2308;3314;5952;6261;6411;6844	1020;1710;3031;3032;3430;5179;9100;9528;9708;10367;10368	1073;1816;3247;3248;3690;5640;9874;10332;10517;11217;11218	1073;1816;3248;3690;5640;9874;10332;10517;11217
Q96CS3;D6RBG6;E9PH36;F5H8B0;REV__Q9C000-5;REV__Q9C000-3;REV__Q9C000-2;REV__I3L2G5;REV__Q9C000-4;REV__Q9C000;P08709-2;P08709	Q96CS3	17;1;1;1;1;1;1;1;1;1;1;1	17;1;1;1;1;1;1;1;1;1;1;1	17;1;1;1;1;1;1;1;1;1;1;1	FAS-associated factor 2	FAF2	sp|Q96CS3|FAF2_HUMAN FAS-associated factor 2 OS=Homo sapiens OX=9606 GN=FAF2 PE=1 SV=2	12	17	17	17	52.6	52.6	52.6	52623	445	445;48;74;382;1375;1399;1429;1429;1443;1473;444;466	0	279.92	4784900000	159500000	22				954	247;946;1499;1855;1917;2567;3094;3298;3604;4120;4454;4591;4856;4872;5340;6329;6349	True;True;True;True;True;True;True;True;True;True;True;True;True;True;True;True;True	268;1010;1607;1982;2050;2737;3290;3503;3817;3818;4395;4786;4930;5201;5217;5712;6760;6780	379;1518;2496;2950;3043;4287;4288;4289;5145;5414;5907;5908;5909;6674;7344;7345;7533;7915;7931;8666;10249;10292;10293	393;1596;2696;3164;3259;4672;4673;4674;5604;5880;6431;6432;6433;7248;7986;7987;8183;8591;8607;9377;11089;11140;11141	393;1596;2696;3164;3259;4674;5604;5880;6432;7248;7986;8183;8591;8607;9377;11089;11141	481	29
P06576;H0YH81;F8W079;F8W0P7;H0YI37	P06576;H0YH81;F8W079	18;14;11;6;5	18;14;11;6;5	18;14;11;6;5	ATP synthase subunit beta, mitochondrial;ATP synthase subunit beta	ATP5B	sp|P06576|ATPB_HUMAN ATP synthase subunit beta, mitochondrial OS=Homo sapiens OX=9606 GN=ATP5F1B PE=1 SV=3;tr|H0YH81|H0YH81_HUMAN ATP synthase subunit beta (Fragment) OS=Homo sapiens OX=9606 GN=ATP5F1B PE=1 SV=1;tr|F8W079|F8W079_HUMAN ATP synthase subunit	5	18	18	18	55.6	55.6	55.6	56559	529	529;362;284;270;133	0	263.94	5285700000	155460000	26				534	245;1022;1316;1874;1961;2108;2303;2710;2847;2853;2898;2902;3927;5241;5618;5835;6126;6390	True;True;True;True;True;True;True;True;True;True;True;True;True;True;True;True;True;True	266;1093;1408;2002;2099;2251;2459;2885;3027;3028;3035;3036;3084;3088;4156;5607;6007;6008;6238;6545;6823	376;377;1666;1667;2229;2230;2976;3130;3347;3768;4561;4762;4763;4764;4771;4772;4824;4828;6344;6345;8473;8474;9176;9177;9502;9881;10343	390;391;1769;1770;2422;2423;3190;3351;3591;4092;4987;5205;5206;5207;5214;5215;5269;5273;6882;6883;9168;9169;9957;9958;10305;10692;11192	390;1769;2423;3190;3351;3591;4092;4987;5207;5215;5269;5273;6883;9168;9958;10305;10692;11192	203;204;205	113;145;408
P60059	P60059	2	2	2	Protein transport protein Sec61 subunit gamma	SEC61G	sp|P60059|SC61G_HUMAN Protein transport protein Sec61 subunit gamma OS=Homo sapiens OX=9606 GN=SEC61G PE=1 SV=1	1	2	2	2	36.8	36.8	36.8	77412	68	68	0	18996	464670000	154890000	2				692	3466;4036	True;True	3678;4281	5681;6521	6184;7075	6184;7075
A0A0A0MR02;P45880;P45880-2;P45880-1;Q5JSD2;Q5JSD1;A2A3S1	A0A0A0MR02;P45880;P45880-2;P45880-1;Q5JSD2;Q5JSD1	10;10;9;9;7;7;4	10;10;9;9;7;7;4	10;10;9;9;7;7;4	Voltage-dependent anion-selective channel protein 2	VDAC2	tr|A0A0A0MR02|A0A0A0MR02_HUMAN Voltage-dependent anion-selective channel protein 2 (Fragment) OS=Homo sapiens OX=9606 GN=VDAC2 PE=1 SV=1;sp|P45880|VDAC2_HUMAN Voltage-dependent anion-selective channel protein 2 OS=Homo sapiens OX=9606 GN=VDAC2 PE=1 SV=2;sp	7	10	10	10	47.9	47.9	47.9	30348	282	282;294;283;309;194;204;109	0	166.03	2624800000	154400000	11				40	525;2102;3865;3879;5046;5582;6356;6483;6526;6759	True;True;True;True;True;True;True;True;True;True	563;2245;4091;4106;5399;5970;6787;6924;6969;7223	852;3341;6257;6275;8178;9122;9123;10301;10504;10551;10892	888;3585;6792;6810;8859;9897;9898;11149;11367;11414;11769	888;3585;6792;6810;8859;9898;11149;11367;11414;11769
O15121;E7EMA0	O15121	5;1	5;1	5;1	Sphingolipid delta(4)-desaturase DES1	DEGS1	sp|O15121|DEGS1_HUMAN Sphingolipid delta(4)-desaturase DES1 OS=Homo sapiens OX=9606 GN=DEGS1 PE=1 SV=1	2	5	5	5	26	26	26	37866	323	323;261	0	83997	2404700000	150290000	10				439	1205;2143;2610;6210;6332	True;True;True;True;True	1290;2288;2782;6632;6763	1902;1903;3389;3390;4349;4350;10047;10254;10255	2016;2017;3634;3635;3636;4736;4737;10881;11094;11095	2017;3636;4737;10881;11095
Q15907;Q15907-2;M0R2D0	Q15907;Q15907-2	10;9;2	10;9;2	2;1;1	Ras-related protein Rab-11B	RAB11B	sp|Q15907|RB11B_HUMAN Ras-related protein Rab-11B OS=Homo sapiens OX=9606 GN=RAB11B PE=1 SV=4;sp|Q15907-2|RB11B_HUMAN Isoform 2 of Ras-related protein Rab-11B OS=Homo sapiens OX=9606 GN=RAB11B	3	10	10	2	50.5	50.5	2020-03-13	24488	218	218;179;60	0	97.53	2854200000	150220000	12				780	283;452;583;859;2035;2340;4258;4319;4399;5285	True;True;True;True;True;True;True;True;True;True	307;489;629;917;918;2175;2499;4574;4638;4727;5655	437;763;974;1355;1356;1357;3225;3916;6982;7133;7243;8596	455;799;1026;1423;1424;1425;3447;4266;7576;7755;7870;9306	455;799;1026;1425;3447;4266;7576;7755;7870;9306	371	120
E9PMI6;J3KN38;P54105;E9PJF4;E9PQ83	E9PMI6;J3KN38;P54105;E9PJF4	6;6;6;4;1	6;6;6;4;1	6;6;6;4;1	Methylosome subunit pICln	CLNS1A	tr|E9PMI6|E9PMI6_HUMAN Methylosome subunit pICln OS=Homo sapiens OX=9606 GN=CLNS1A PE=1 SV=1;tr|J3KN38|J3KN38_HUMAN Methylosome subunit pICln OS=Homo sapiens OX=9606 GN=CLNS1A PE=1 SV=1;sp|P54105|ICLN_HUMAN Methylosome subunit pICln OS=Homo sapiens OX=9606	5	6	6	6	70.1	70.1	70.1	18259	167	167;203;237;179;49	0	63382	1336800000	148530000	5				270	1048;2205;3299;3852;4869;5537	True;True;True;True;True;True	1120;2353;3504;4078;5214;5920	1699;3531;5415;6244;7928;8979	1805;3811;5881;6779;8604;9715	1805;3811;5881;6779;8604;9715	105	132
O60725;K7EQW0;Q7Z750	O60725;K7EQW0;Q7Z750	4;2;2	4;2;2	4;2;2	Protein-S-isoprenylcysteine O-methyltransferase	ICMT	sp|O60725|ICMT_HUMAN Protein-S-isoprenylcysteine O-methyltransferase OS=Homo sapiens OX=9606 GN=ICMT PE=1 SV=1;tr|K7EQW0|K7EQW0_HUMAN Protein-S-isoprenylcysteine O-methyltransferase OS=Homo sapiens OX=9606 GN=ICMT PE=1 SV=1;tr|Q7Z750|Q7Z750_HUMAN Protein-S	3	4	4	4	2020-07-18	2020-07-18	2020-07-18	31938	284	284;94;116	0	65361	1625200000	147740000	7				469	56;3819;6274;6757	True;True;True;True	61;62;4043;6702;7221	118;119;120;6188;6189;10140;10890	123;124;125;6715;6716;10976;11767	124;6716;10976;11767	176	178
B4DR61;P61619;P61619-3;H7C1Q9;C9JXC6;H7C069;A6NK38;F2Z2C7;A6NIF9;C9JJV4	B4DR61;P61619;P61619-3	10;10;6;3;3;3;3;3;3;3	10;10;6;3;3;3;3;3;3;3	7;7;6;0;0;0;0;0;0;0	Protein transport protein Sec61 subunit alpha isoform 1	SEC61A1	tr|B4DR61|B4DR61_HUMAN cDNA FLJ59739, highly similar to Protein transport protein Sec61 subunit alpha isoform 1 OS=Homo sapiens OX=9606 GN=SEC61A1 PE=1 SV=1;sp|P61619|S61A1_HUMAN Protein transport protein Sec61 subunit alpha isoform 1 OS=Homo sapiens OX=96	10	10	10	7	2020-01-31	2020-01-31	2020-07-23	52949	482	482;476;356;94;101;145;159;162;168;189	0	98679	2821900000	141100000	14				142	189;1604;1932;2229;2291;2335;2750;2751;3359;4519	True;True;True;True;True;True;True;True;True;True	206;1715;1716;2065;2379;2380;2447;2492;2493;2494;2925;2926;3567;4854	302;2631;2632;3062;3583;3584;3585;3753;3908;3909;3910;3911;4607;4608;5534;7443	316;2842;2843;3278;3876;3877;3878;4076;4258;4259;4260;4261;5034;5035;6033;8093	316;2842;3278;3877;4076;4261;5034;5035;6033;8093	48;49;50;51	83;97;213;415
Q7Z2K6;E7ER77;A0A0C4DGF0;Q7Z2K6-2	Q7Z2K6;E7ER77	22;19;7;7	22;19;7;7	22;19;7;7	Endoplasmic reticulum metallopeptidase 1	ERMP1	sp|Q7Z2K6|ERMP1_HUMAN Endoplasmic reticulum metallopeptidase 1 OS=Homo sapiens OX=9606 GN=ERMP1 PE=1 SV=2;tr|E7ER77|E7ER77_HUMAN Endoplasmic reticulum metallopeptidase 1 OS=Homo sapiens OX=9606 GN=ERMP1 PE=1 SV=1	4	22	22	22	32.6	32.6	32.6	100.23	904	904;841;351;351	0	323.31	5765000000	140610000	29				842	46;176;204;444;814;1132;1294;1453;1544;2318;2533;2760;2840;3456;3866;4072;4485;5312;5561;5703;5796;6006	True;True;True;True;True;True;True;True;True;True;True;True;True;True;True;True;True;True;True;True;True;True	50;192;222;481;871;1210;1386;1550;1653;2474;2701;2935;3020;3668;4092;4093;4331;4820;5683;5948;6095;6197;6418	105;286;323;324;728;1303;1809;1810;2083;2412;2413;2551;3816;4243;4244;4634;4755;5669;5670;6258;6259;6584;7398;7399;8627;9072;9282;9412;9413;9717	110;300;337;338;758;1371;1919;1920;2221;2609;2610;2753;4146;4627;4628;5072;5198;6172;6173;6793;6794;7139;8043;8044;9337;9832;10063;10205;10206;10526	110;300;337;758;1371;1920;2221;2609;2753;4146;4628;5072;5198;6172;6794;7139;8043;9337;9832;10063;10206;10526	435	800
Q9Y320;Q9Y320-2;E9PSF0;E9PRL5;H3BSU7;E9PLR1;G3V155	Q9Y320;Q9Y320-2	14;12;3;3;3;3;3	14;12;3;3;3;3;3	14;12;3;3;3;3;3	Thioredoxin-related transmembrane protein 2	TMX2	sp|Q9Y320|TMX2_HUMAN Thioredoxin-related transmembrane protein 2 OS=Homo sapiens OX=9606 GN=TMX2 PE=1 SV=1;sp|Q9Y320-2|TMX2_HUMAN Isoform 2 of Thioredoxin-related transmembrane protein 2 OS=Homo sapiens OX=9606 GN=TMX2	7	14	14	14	47.3	47.3	47.3	34037	296	296;258;84;86;103;103;115	0	135.65	2942400000	140110000	18				1128	205;206;571;593;1287;3718;4018;4831;5173;5624;5625;5907;6726;6789	True;True;True;True;True;True;True;True;True;True;True;True;True;True	223;224;615;616;640;1379;3939;4258;5175;5539;6014;6015;6313;7188;7254	325;326;958;959;960;985;2074;6062;6492;6493;7877;8362;8363;9184;9185;9186;9590;10839;10931	339;340;1010;1011;1012;1037;2212;6588;7045;7046;8545;9050;9051;9965;9966;9967;10396;11714;11809	339;340;1010;1037;2212;6588;7045;8545;9051;9965;9966;10396;11714;11809
O95197-3;B7Z4M1;O95197-6;O95197-5;O95197-4;O95197-7;O95197-2;O95197	O95197-3;B7Z4M1;O95197-6;O95197-5;O95197-4;O95197-7;O95197-2;O95197	2;1;1;1;1;1;1;1	2;1;1;1;1;1;1;1	2;1;1;1;1;1;1;1	Reticulon-3;Reticulon	RTN3	sp|O95197-3|RTN3_HUMAN Isoform 3 of Reticulon-3 OS=Homo sapiens OX=9606 GN=RTN3;tr|B7Z4M1|B7Z4M1_HUMAN Reticulon OS=Homo sapiens OX=9606 GN=RTN3 PE=1 SV=1;sp|O95197-6|RTN3_HUMAN Isoform 6 of Reticulon-3 OS=Homo sapiens OX=9606 GN=RTN3;sp|O95197-5|RTN3_HUMA	8	2	2	2	11	11	11	25609	236	236;123;214;241;255;920;1013;1032	0	33471	1112500000	139060000	3				499	5048;5754	True;True	5401;6150	8180;9344;9345	8861;10125;10126	8861;10126
Q15392-2;Q15392;A0A0A0MTI1;H7C4B7;A0A3B3IT58;A0A3B3IRV7;A0A3B3ISR5;A0A3B3ITT9	Q15392-2;Q15392;A0A0A0MTI1	11;11;10;4;3;3;3;3	11;11;10;4;3;3;3;3	11;11;10;4;3;3;3;3	Delta(24)-sterol reductase	DHCR24	sp|Q15392-2|DHC24_HUMAN Isoform 2 of Delta(24)-sterol reductase OS=Homo sapiens OX=9606 GN=DHCR24;sp|Q15392|DHC24_HUMAN Delta(24)-sterol reductase OS=Homo sapiens OX=9606 GN=DHCR24 PE=1 SV=2;tr|A0A0A0MTI1|A0A0A0MTI1_HUMAN Delta(24)-sterol reductase OS=Homo	8	11	11	11	2020-03-30	2020-03-30	2020-03-30	54.75	475	475;516;528;154;122;133;153;167	0	154.94	3864200000	138010000	20				774	1244;2580;3365;3887;3981;4320;4321;4547;4734;5159;6693	True;True;True;True;True;True;True;True;True;True;True	1331;2751;3573;4115;4212;4213;4639;4640;4882;5074;5524;7152	1952;1953;4310;5541;6294;6295;6415;6416;6417;6418;6419;6420;7134;7135;7136;7472;7701;7702;8341;10801	2072;2073;4696;6040;6830;6831;6954;6955;6956;6957;6958;6959;7756;7757;7758;7759;8122;8353;8354;9025;11675	2073;4696;6040;6830;6958;7756;7758;8122;8353;9025;11675	411;412	346;350
H3BPJ2;H3BN98;Q15041;Q15041-3;Q15041-2;H3BTX6;H3BS91	H3BPJ2;H3BN98;Q15041;Q15041-3;Q15041-2	3;3;3;2;2;1;1	3;3;3;2;2;1;1	3;3;3;2;2;1;1	ADP-ribosylation factor-like protein 6-interacting protein 1	ARL6IP1	tr|H3BPJ2|H3BPJ2_HUMAN ADP-ribosylation factor-like protein 6-interacting protein 1 (Fragment) OS=Homo sapiens OX=9606 GN=ARL6IP1 PE=4 SV=2;tr|H3BN98|H3BN98_HUMAN Uncharacterized protein (Fragment) OS=Homo sapiens OX=9606 PE=4 SV=2;sp|Q15041|AR6P1_HUMAN AD	7	3	3	3	45.5	45.5	45.5	12006	101	101;237;203;151;174;88;99	0	75011	1098400000	137300000	6				344	1801;5396;6544	True;True;True	1927;5772;5773;6988	2885;2886;8747;8748;8749;10576	3097;3098;9465;9466;9467;11440	3097;9467;11440	117	32
A0A3B3ISV4	A0A3B3ISV4	6	6	1			tr|A0A3B3ISV4|A0A3B3ISV4_HUMAN Vitamin K epoxide reductase complex subunit 1-like protein 1 OS=Homo sapiens OX=9606 GN=VKORC1L1 PE=1 SV=1	1	6	6	1	2020-07-28	2020-07-28	2020-01-08	23499	223	223	0	43841	1595000000	132920000	6				106	2;301;702;2103;3966;3998	True;True;True;True;True;True	2;326;755;2246;4197;4231	2;465;1135;3342;6398;6460	2;483;1192;3586;6937;7013	2;483;1192;3586;6937;7013
Q969N2;A0A1W2PNP0;Q969N2-5;A0A1W2PPR6;A0A1W2PPS0;A0A1W2PPC3;A0A1W2PP57;Q969N2-4;Q969N2-6;A0A1W2PP53;A0A1W2PRZ8;A0A1W2PR92;A0A1W2PQN1;A0A1W2PQ29;Q969N2-3;Q969N2-2;A0A1W2PPQ7;A0A1W2PPI8;F6W983;A0A1W2PRH2;A0A1W2PP13;A0A1W2PQ52;A0A1W2PRV7;H7C2Y2;A0A1W2PRG1;A0A1W2PNW9;A0A1W2PPU8;A0A1W2PRH8;A0A1W2PQY1;A0A1W2PPK4;A0A1W2PSC5;A0A1W2PQL3;A0A1W2PR70;A0A1W2PNZ5;A0A1W2PP98;A0A1W2PNS2;A0A1W2PR22;B7Z7C5;A0A1W2P…	Q969N2;A0A1W2PNP0;Q969N2-5;A0A1W2PPR6;A0A1W2PPS0;A0A1W2PPC3;A0A1W2PP57;Q969N2-4;Q969N2-6;A0A1W2PP53;A0A1W2PRZ8;A0A1W2PR92;A0A1W2PQN1;A0A1W2PQ29;Q969N2-3;Q969N2-2;A0A1W2PPQ7;A0A1W2PPI8;F6W983;A0A1W2PRH2;A0A1W2PP13;A0A1W2PQ52	19;18;18;17;17;17;17;17;15;14;14;13;13;11;11;11;11;11;11;10;10;10;9;9;8;8;6;6;6;5;4;4;4;3;3;3;3;3;3;2;2;2;2;2;1;1;1	19;18;18;17;17;17;17;17;15;14;14;13;13;11;11;11;11;11;11;10;10;10;9;9;8;8;6;6;6;5;4;4;4;3;3;3;3;3;3;2;2;2;2;2;1;1;1	19;18;18;17;17;17;17;17;15;14;14;13;13;11;11;11;11;11;11;10;10;10;9;9;8;8;6;6;6;5;4;4;4;3;3;3;3;3;3;2;2;2;2;2;1;1;1	GPI transamidase component PIG-T	PIGT	sp|Q969N2|PIGT_HUMAN GPI transamidase component PIG-T OS=Homo sapiens OX=9606 GN=PIGT PE=1 SV=1;tr|A0A1W2PNP0|A0A1W2PNP0_HUMAN GPI transamidase component PIG-T (Fragment) OS=Homo sapiens OX=9606 GN=PIGT PE=1 SV=1;sp|Q969N2-5|PIGT_HUMAN Isoform 5 of GPI tra	47	19	19	19	43.9	43.9	43.9	65699	578	578;580;522;532;505;499;495;476;511;441;429;432;329;300;367;384;393;314;384;316;354;318;331;275;232;240;242;203;213;144;128;198;101;140;191;183;116;123;128;171;136;145;78;96;18;61;77	0	215.53	4485900000	131940000	22				944	185;224;713;1124;1258;1417;1447;1649;2073;3196;3335;3995;4644;5694;6322;6488;6542;6562;6803	True;True;True;True;True;True;True;True;True;True;True;True;True;True;True;True;True;True;True	202;242;767;1201;1346;1512;1544;1765;2214;3397;3541;4228;4984;6086;6753;6929;6986;7007;7268	298;346;1147;1800;1969;2362;2405;2689;3276;3277;5290;5498;5499;6457;7596;7597;9269;10242;10509;10573;10616;10953	312;360;1204;1910;2089;2558;2602;2900;3501;3502;5754;5755;5994;5995;7010;8247;8248;10050;11082;11372;11437;11484;11833	312;360;1204;1910;2089;2558;2602;2900;3502;5755;5994;7010;8248;10050;11082;11372;11437;11484;11833
Q5BJD5;E9PJ42;Q5BJD5-3;Q5BJD5-2	Q5BJD5;E9PJ42;Q5BJD5-3;Q5BJD5-2	5;3;3;3	5;3;3;3	5;3;3;3	Transmembrane protein 41B	TMEM41B	sp|Q5BJD5|TM41B_HUMAN Transmembrane protein 41B OS=Homo sapiens OX=9606 GN=TMEM41B PE=1 SV=1;tr|E9PJ42|E9PJ42_HUMAN Transmembrane protein 41B OS=Homo sapiens OX=9606 GN=TMEM41B PE=1 SV=1;sp|Q5BJD5-3|TM41B_HUMAN Isoform 3 of Transmembrane protein 41B OS=Hom	4	5	5	5	2020-07-22	2020-07-22	2020-07-22	32513	291	291;196;127;192	0	57356	1578000000	131500000	8				795	2184;2978;4280;5327;6537	True;True;True;True;True	2330;3166;4596;5698;6981	3503;4934;4935;7031;8647;8648;8649;10564	3783;5379;5380;7632;9358;9359;9360;11427	3783;5379;7632;9360;11427
Q9Y5U9;A0A1W2PNR9;R4GN61	Q9Y5U9;A0A1W2PNR9	3;3;1	3;3;1	3;3;1	Immediate early response 3-interacting protein 1	IER3IP1	sp|Q9Y5U9|IR3IP_HUMAN Immediate early response 3-interacting protein 1 OS=Homo sapiens OX=9606 GN=IER3IP1 PE=1 SV=1;tr|A0A1W2PNR9|A0A1W2PNR9_HUMAN Immediate early response 3-interacting protein 1 OS=Homo sapiens OX=9606 GN=IER3IP1 PE=1 SV=1	3	3	3	3	64.6	64.6	64.6	89687	82	82;69;40	0	36401	523010000	130750000	3				86	191;4315;5328	True;True;True	208;4634;5699	304;7127;8650	318;7749;9361	318;7749;9361
Q9Y265;Q9Y265-2;E7ETR0;H7C4G5;J3QLR1;H7C4I3	Q9Y265;Q9Y265-2;E7ETR0	17;13;10;7;3;2	17;13;10;7;3;2	17;13;10;7;3;2	RuvB-like 1	RUVBL1	sp|Q9Y265|RUVB1_HUMAN RuvB-like 1 OS=Homo sapiens OX=9606 GN=RUVBL1 PE=1 SV=1;sp|Q9Y265-2|RUVB1_HUMAN Isoform 2 of RuvB-like 1 OS=Homo sapiens OX=9606 GN=RUVBL1;tr|E7ETR0|E7ETR0_HUMAN RuvB-like helicase OS=Homo sapiens OX=9606 GN=RUVBL1 PE=1 SV=1	6	17	17	17	56.4	56.4	56.4	50227	456	456;386;315;267;131;222	0	254.22	3920600000	130690000	25				1122	458;1146;1351;1365;1654;2199;2326;2780;3130;3264;4677;5476;5640;5708;5955;6251;6784	True;True;True;True;True;True;True;True;True;True;True;True;True;True;True;True;True	495;1227;1444;1458;1770;2346;2483;2957;3328;3468;5017;5857;6030;6100;6101;6364;6677;7249	769;770;771;1827;2276;2277;2294;2295;2697;3523;3896;3897;4673;5198;5199;5371;7632;8882;9201;9202;9287;9288;9648;10101;10926	805;806;807;1937;2470;2471;2488;2489;2908;3803;4246;4247;5112;5659;5660;5837;8283;9608;9982;9983;10068;10069;10455;10935;11804	806;1937;2470;2488;2908;3803;4247;5112;5659;5837;8283;9608;9983;10069;10455;10935;11804	566;567	113;364
D6RE58;D6RHG0;D6RB73;P78383;P78383-2;D6RG34;D6R9G9;D6R981	D6RE58;D6RHG0;D6RB73;P78383;P78383-2;D6RG34;D6R9G9;D6R981	3;3;3;3;3;2;2;2	3;3;3;3;3;2;2;2	3;3;3;3;3;2;2;2	Solute carrier family 35 member B1	SLC35B1	tr|D6RE58|D6RE58_HUMAN Solute carrier family 35 member B1 (Fragment) OS=Homo sapiens OX=9606 GN=SLC35B1 PE=1 SV=1;tr|D6RHG0|D6RHG0_HUMAN Solute carrier family 35 member B1 (Fragment) OS=Homo sapiens OX=9606 GN=SLC35B1 PE=1 SV=9;tr|D6RB73|D6RB73_HUMAN Solut	8	3	3	3	2020-09-13	2020-09-13	2020-09-13	20803	187	187;248;254;322;359;76;158;227	0	17.66	910020000	130000000	4				219	2811;4561;5038	True;True;True	2988;4897;4898;5390	4710;7492;7493;8169	5150;8142;8143;8850	5150;8143;8850	96	94
Q9P2X0;Q9P2X0-2	Q9P2X0;Q9P2X0-2	1;1	1;1	1;1	Dolichol-phosphate mannosyltransferase subunit 3	DPM3	sp|Q9P2X0|DPM3_HUMAN Dolichol-phosphate mannosyltransferase subunit 3 OS=Homo sapiens OX=9606 GN=DPM3 PE=1 SV=2;sp|Q9P2X0-2|DPM3_HUMAN Isoform 2 of Dolichol-phosphate mannosyltransferase subunit 3 OS=Homo sapiens OX=9606 GN=DPM3	2	1	1	1	13	13	13	10094	92	92;122	0	17049	388300000	129430000	2				1097	5915	True	6321	9599;9600	10405;10406	10406
Q96HH6-2;Q96HH6;F8VRE8;F8VS20;H0YHY1;H0YIS8	Q96HH6-2;Q96HH6;F8VRE8;F8VS20	3;3;2;2;1;1	3;3;2;2;1;1	3;3;2;2;1;1	Transmembrane protein 19	TMEM19	sp|Q96HH6-2|TMM19_HUMAN Isoform 2 of Transmembrane protein 19 OS=Homo sapiens OX=9606 GN=TMEM19;sp|Q96HH6|TMM19_HUMAN Transmembrane protein 19 OS=Homo sapiens OX=9606 GN=TMEM19 PE=1 SV=1;tr|F8VRE8|F8VRE8_HUMAN Transmembrane protein 19 (Fragment) OS=Homo sa	6	3	3	3	2020-04-10	2020-04-10	2020-04-10	32447	298	298;336;143;170;152;166	0	16261	905220000	129320000	2				965	3497;4980;6515	True;True;True	3709;5330;6958	5716;8094;10539	6219;8775;11402	6219;8775;11402
Q9NTJ5;E9PGZ4;Q9NTJ5-2;C9JV50;F8WDN7;F8WCQ2	Q9NTJ5;E9PGZ4;Q9NTJ5-2	24;19;19;9;9;3	24;19;19;9;9;3	24;19;19;9;9;3	Phosphatidylinositide phosphatase SAC1	SACM1L	sp|Q9NTJ5|SAC1_HUMAN Phosphatidylinositide phosphatase SAC1 OS=Homo sapiens OX=9606 GN=SACM1L PE=1 SV=2;tr|E9PGZ4|E9PGZ4_HUMAN Phosphatidylinositide phosphatase SAC1 OS=Homo sapiens OX=9606 GN=SACM1L PE=1 SV=1;sp|Q9NTJ5-2|SAC1_HUMAN Isoform 2 of Phosphatid	6	24	24	24	46.2	46.2	46.2	66966	587	587;484;526;187;287;71	0	232.26	4606800000	127970000	33				1068	477;512;834;1440;1982;2158;3292;3423;3435;4242;4394;4570;4722;4913;4936;5274;5605;5707;5720;5905;6021;6335;6615;6656	True;True;True;True;True;True;True;True;True;True;True;True;True;True;True;True;True;True;True;True;True;True;True;True	514;549;892;1537;2120;2303;3497;3634;3647;4556;4722;4908;4909;5062;5259;5283;5643;5644;5994;6099;6114;6311;6433;6766;7066;7112	793;835;836;1325;2397;2398;3160;3424;5408;5620;5621;5639;6959;7238;7505;7506;7507;7682;7986;8019;8583;8584;9154;9155;9286;9302;9587;9588;9733;9734;10258;10698;10752;10753	829;871;872;1393;2593;2594;3382;3684;5874;6121;6122;6141;7552;7864;8155;8156;8157;8334;8664;8698;9293;9294;9931;9932;10067;10083;10393;10394;10542;10543;11098;11570;11625;11626	829;871;1393;2594;3382;3684;5874;6121;6141;7552;7864;8157;8334;8664;8698;9294;9932;10067;10083;10394;10542;11098;11570;11626	532;533	332;390
Q92685;H7C0X4;C9J7S5;Q92685-2;F8WF93;H7BZZ2;F8WE30;J3KSG2;Q5M775-4;Q5M775	Q92685;H7C0X4;C9J7S5;Q92685-2	8;7;6;6;1;1;1;1;1;1	8;7;6;6;1;1;1;1;1;1	8;7;6;6;1;1;1;1;1;1	Dol-P-Man:Man(5)GlcNAc(2)-PP-Dol alpha-1,3-mannosyltransferase	ALG3	sp|Q92685|ALG3_HUMAN Dol-P-Man:Man(5)GlcNAc(2)-PP-Dol alpha-1,3-mannosyltransferase OS=Homo sapiens OX=9606 GN=ALG3 PE=1 SV=1;tr|H7C0X4|H7C0X4_HUMAN Dol-P-Man:Man(5)GlcNAc(2)-PP-Dol alpha-1,3-mannosyltransferase (Fragment) OS=Homo sapiens OX=9606 GN=ALG3 P	10	8	8	8	2020-06-19	2020-06-19	2020-06-19	50126	438	438;323;398;390;65;105;107;534;987;1068	0	67969	3056200000	127340000	10				936	1866;5112;5135;5587;5588;5920;6058;6269	True;True;True;True;True;True;True;True	1993;5475;5499;5975;5976;6326;6473;6696	2963;2964;8272;8305;9133;9134;9135;9608;9789;10123	3177;3178;8954;8987;9909;9910;9911;10415;10598;10958	3177;8954;8987;9909;9911;10415;10598;10958
Q9HCU5;B5MC98;H7C0W3;H7C2N7;F8WCS5	Q9HCU5;B5MC98	12;10;3;2;1	12;10;3;2;1	12;10;3;2;1	Prolactin regulatory element-binding protein	PREB	sp|Q9HCU5|PREB_HUMAN Prolactin regulatory element-binding protein OS=Homo sapiens OX=9606 GN=PREB PE=1 SV=2;tr|B5MC98|B5MC98_HUMAN Prolactin regulatory element-binding protein OS=Homo sapiens OX=9606 GN=PREB PE=1 SV=1	5	12	12	12	43.4	43.4	43.4	45468	417	417;359;176;106;50	0	221.71	3150900000	126030000	20				1049	244;415;532;645;695;1163;1792;3351;3794;3960;4292;6388	True;True;True;True;True;True;True;True;True;True;True;True	265;450;571;572;695;747;1244;1918;3559;4017;4191;4609;6821	374;375;690;691;861;862;1049;1117;1846;1847;2874;5525;6158;6159;6389;7087;10340;10341	388;389;720;721;897;898;899;1103;1172;1957;1958;3086;6024;6684;6685;6927;7706;11188;11189;11190	388;721;897;1103;1172;1958;3086;6024;6684;6927;7706;11190	513	73
P51648-2;P51648;J3QRD1;I3L1M4;J3QS00;C9JGJ2;I3L0X1;J3KTG1;J3KTD9;J3QKK9;I3L2W1;K7EN73;P48448;P43353-2;C9JMC5;C9JKT2;P30838;I3L3I9;A8MYB8;P43353;E9PNN6;E9PJV0	P51648-2;P51648;J3QRD1	16;16;15;7;5;3;3;3;2;2;2;1;1;1;1;1;1;1;1;1;1;1	16;16;15;7;5;3;3;3;2;2;2;1;1;1;1;1;1;1;1;1;1;1	16;16;15;7;5;3;3;3;2;2;2;1;1;1;1;1;1;1;1;1;1;1	Fatty aldehyde dehydrogenase	ALDH3A2	sp|P51648-2|AL3A2_HUMAN Isoform 2 of Fatty aldehyde dehydrogenase OS=Homo sapiens OX=9606 GN=ALDH3A2;sp|P51648|AL3A2_HUMAN Fatty aldehyde dehydrogenase OS=Homo sapiens OX=9606 GN=ALDH3A2 PE=1 SV=1;tr|J3QRD1|J3QRD1_HUMAN Fatty aldehyde dehydrogenase OS=Homo	22	16	16	16	35.4	35.4	35.4	57669	508	508;485;393;162;134;166;182;146;62;54;97;126;385;431;372;259;453;380;389;468;396;147	0	123.63	3937000000	123030000	18				666	771;1293;1570;2511;2554;2617;2837;3006;3592;3770;4460;4567;4625;4685;6222;6657	True;True;True;True;True;True;True;True;True;True;True;True;True;True;True;True	828;1385;1680;2678;2724;2791;3017;3195;3805;3992;4792;4905;4964;5025;6645;6646;7113	1238;2082;2589;4216;4270;4447;4751;4976;5893;5894;6128;7351;7502;7575;7641;10061;10062;10754	1302;2220;2799;4600;4655;4868;5194;5421;6417;6418;6654;7993;8152;8226;8293;10895;10896;11627	1302;2220;2799;4600;4655;4868;5194;5421;6418;6654;7993;8152;8226;8293;10895;11627	340;341	194;328
Q07021;I3L3Q7;I3L3B0	Q07021;I3L3Q7;I3L3B0	5;4;4	5;4;4	5;4;4	Complement component 1 Q subcomponent-binding protein, mitochondrial	C1QBP	sp|Q07021|C1QBP_HUMAN Complement component 1 Q subcomponent-binding protein, mitochondrial OS=Homo sapiens OX=9606 GN=C1QBP PE=1 SV=1;tr|I3L3Q7|I3L3Q7_HUMAN Complement component 1 Q subcomponent-binding protein, mitochondrial (Fragment) OS=Homo sapiens OX=	3	5	5	5	36.5	36.5	36.5	31362	282	282;177;178	0	44755	2184700000	121370000	6				736	192;371;2356;4177;5962	True;True;True;True;True	209;401;2515;4478;6371	305;591;3936;6853;9655;9656	319;611;4288;7439;10462;10463	319;611;4288;7439;10462
Q9NXS2;Q9NXS2-3;K7EQG1;J3QQK8;E7EP17;Q9NYC9-2;Q9NYC9	Q9NXS2;Q9NXS2-3	12;7;4;1;1;1;1	12;7;4;1;1;1;1	12;7;4;1;1;1;1	Glutaminyl-peptide cyclotransferase-like protein	QPCTL	sp|Q9NXS2|QPCTL_HUMAN Glutaminyl-peptide cyclotransferase-like protein OS=Homo sapiens OX=9606 GN=QPCTL PE=1 SV=2;sp|Q9NXS2-3|QPCTL_HUMAN Isoform 2 of Glutaminyl-peptide cyclotransferase-like protein OS=Homo sapiens OX=9606 GN=QPCTL	7	12	12	12	59.4	59.4	59.4	42924	382	382;288;121;319;4410;4410;4486	0	114.04	1909300000	119330000	15				1081	1836;2376;2483;2510;3343;3682;4585;4676;5249;5540;5734;6261	True;True;True;True;True;True;True;True;True;True;True;True	1963;2537;2649;2677;3551;3903;4924;5016;5615;5923;6128;6687	2928;3978;4128;4215;5516;6014;6015;7526;7630;7631;8550;8551;8982;9318;10113	3142;4332;4485;4599;6015;6539;6540;8176;8281;8282;9260;9261;9718;10099;10948	3142;4332;4485;4599;6015;6540;8176;8281;9260;9718;10099;10948
Q7L1Q6;Q7L1Q6-4;Q7L1Q6-3;Q7L1Q6-2;C9IZ80;C9JFN4;C9J188;C9JWF5;C9JV57;H0Y503;E9PFD4	Q7L1Q6;Q7L1Q6-4;Q7L1Q6-3;Q7L1Q6-2;C9IZ80;C9JFN4	20;20;20;17;14;10;7;7;4;3;1	20;20;20;17;14;10;7;7;4;3;1	19;19;19;16;14;10;7;7;4;3;0	Basic leucine zipper and W2 domain-containing protein 1	BZW1	sp|Q7L1Q6|BZW1_HUMAN Basic leucine zipper and W2 domain-containing protein 1 OS=Homo sapiens OX=9606 GN=BZW1 PE=1 SV=1;sp|Q7L1Q6-4|BZW1_HUMAN Isoform 4 of Basic leucine zipper and W2 domain-containing protein 1 OS=Homo sapiens OX=9606 GN=BZW1;sp|Q7L1Q6-3|B	11	20	20	19	56.1	56.1	54.4	48043	419	419;423;451;353;294;216;154;161;116;135;189	0	200.74	3807900000	119000000	26				838	164;893;894;1434;1547;1727;1833;2095;2096;2110;2910;3022;3075;3192;3648;4395;4886;4948;6556;6630	True;True;True;True;True;True;True;True;True;True;True;True;True;True;True;True;True;True;True;True	179;953;954;1530;1531;1656;1847;1960;2238;2239;2253;3096;3097;3214;3271;3393;3866;4723;5231;5295;7001;7081	272;1421;1422;2386;2387;2554;2789;2790;2925;3333;3334;3349;4837;4838;5000;5121;5286;5971;7239;7948;7949;8042;8043;10608;10609;10715	286;1497;1498;2582;2583;2756;3001;3002;3139;3577;3578;3593;5282;5283;5445;5578;5750;6495;7865;8624;8625;8722;8723;11475;11476;11587	286;1497;1498;2583;2756;3002;3139;3577;3578;3593;5283;5445;5578;5750;6495;7865;8624;8723;11475;11587	433;434	265;356
A0A0A6YYA0;Q86XR7-2;Q9Y3B3-2;Q9Y3B3;G3V2Y2	A0A0A6YYA0;Q86XR7-2;Q9Y3B3-2;Q9Y3B3	6;6;6;6;1	6;6;6;6;1	6;6;6;6;1	Transmembrane emp24 domain-containing protein 7	TMED7-TICAM2;TMED7	tr|A0A0A6YYA0|A0A0A6YYA0_HUMAN Protein TMED7-TICAM2 OS=Homo sapiens OX=9606 GN=TMED7-TICAM2 PE=3 SV=1;sp|Q86XR7-2|TCAM2_HUMAN Isoform 2 of TIR domain-containing adapter molecule 2 OS=Homo sapiens OX=9606 GN=TICAM2;sp|Q9Y3B3-2|TMED7_HUMAN Isoform 2 of Trans	5	6	6	6	43.1	43.1	43.1	21233	188	188;404;188;224;81	0	66736	1665200000	118940000	8				51	138;1704;4704;5423;5856;6307	True;True;True;True;True;True	151;1822;5044;5801;6260;6736	242;2761;2762;7662;8783;9527;10179;10180	256;2972;2973;8314;9501;10331;11015;11016	256;2973;8314;9501;10331;11015
Q14697-2;Q14697;F5H6X6;E9PKU7;E9PNH1;Q14697-3	Q14697-2;Q14697;F5H6X6;E9PKU7	26;25;22;21;6;1	26;25;22;21;6;1	26;25;22;21;6;1	Neutral alpha-glucosidase AB	GANAB	sp|Q14697-2|GANAB_HUMAN Isoform 2 of Neutral alpha-glucosidase AB OS=Homo sapiens OX=9606 GN=GANAB;sp|Q14697|GANAB_HUMAN Neutral alpha-glucosidase AB OS=Homo sapiens OX=9606 GN=GANAB PE=1 SV=3;tr|F5H6X6|F5H6X6_HUMAN Neutral alpha-glucosidase AB OS=Homo sap	6	26	26	26	37.5	37.5	37.5	109.44	966	966;944;847;852;119;52	0	261.35	7094800000	118250000	36				762	332;759;802;853;990;1100;1517;1775;2210;2459;2651;3258;3811;3849;3901;4136;4492;4665;4938;5227;5510;6162;6240;6351;6401;6767	True;True;True;True;True;True;True;True;True;True;True;True;True;True;True;True;True;True;True;True;True;True;True;True;True;True	359;816;859;911;1060;1176;1625;1899;2358;2625;2825;3462;4034;4075;4130;4414;4415;4827;5005;5285;5593;5893;6582;6666;6782;6834;7231	534;535;536;1221;1222;1288;1349;1627;1771;1772;2515;2516;2854;3537;3538;4092;4093;4488;5365;6177;6178;6241;6312;6313;6696;6697;7408;7409;7618;8021;8436;8941;9958;10089;10295;10355;10902;10903	554;555;556;1283;1284;1354;1417;1729;1881;1882;2716;2717;3066;3817;3818;4448;4449;4912;5831;6704;6705;6776;6849;6850;7271;7272;8053;8054;8269;8700;9125;9671;10785;10923;11143;11205;11779;11780	554;1284;1354;1417;1729;1881;2717;3066;3817;4448;4912;5831;6705;6776;6849;7271;8053;8269;8700;9125;9671;10785;10923;11143;11205;11780	394;395	360;361
Q8TC12;Q8TC12-2;G3V2G6;G3V234;H0YJ46;Q8TC12-3;H0YJ10;H0YIZ8	Q8TC12;Q8TC12-2;G3V2G6;G3V234;H0YJ46;Q8TC12-3	9;8;6;6;5;5;4;4	9;8;6;6;5;5;4;4	9;8;6;6;5;5;4;4	Retinol dehydrogenase 11	RDH11	sp|Q8TC12|RDH11_HUMAN Retinol dehydrogenase 11 OS=Homo sapiens OX=9606 GN=RDH11 PE=1 SV=2;sp|Q8TC12-2|RDH11_HUMAN Isoform 2 of Retinol dehydrogenase 11 OS=Homo sapiens OX=9606 GN=RDH11;tr|G3V2G6|G3V2G6_HUMAN Retinol dehydrogenase 11 (Fragment) OS=Homo sapi	8	9	9	9	42.5	42.5	42.5	35386	318	318;305;178;186;204;248;91;118	0	96073	2474300000	117820000	9				910	1373;2000;2723;3010;3193;4132;5742;6436;6459	True;True;True;True;True;True;True;True;True	1466;2138;2898;3200;3394;4410;6137;6876;6899	2305;3182;4574;4982;5287;6692;9330;10443;10472	2499;3404;5000;5427;5751;7267;10111;11303;11332	2499;3404;5000;5427;5751;7267;10111;11303;11332
P07099;B1AQP9;B1AQP8	P07099	17;6;4	17;6;4	17;6;4	Epoxide hydrolase 1	EPHX1	sp|P07099|HYEP_HUMAN Epoxide hydrolase 1 OS=Homo sapiens OX=9606 GN=EPHX1 PE=1 SV=1	3	17	17	17	51.9	51.9	51.9	52948	455	455;161;136	0	156.85	3515200000	117170000	19				537	905;1098;1202;1270;1487;1564;1946;2106;2126;2127;2675;4300;4581;5985;6015;6469;6690	True;True;True;True;True;True;True;True;True;True;True;True;True;True;True;True;True	966;1174;1287;1361;1595;1674;2081;2249;2270;2271;2850;4619;4920;6394;6427;6910;7149	1436;1768;1898;2049;2484;2583;3086;3345;3367;3368;4521;4522;7099;7522;9686;9687;9688;9727;10484;10798	1512;1878;2012;2187;2684;2793;3303;3589;3611;3612;4947;4948;7719;8172;10495;10496;10497;10536;11344;11672	1512;1878;2012;2187;2684;2793;3303;3589;3611;3612;4947;7719;8172;10497;10536;11344;11672	209	383
Q9NRZ5;Q9NRZ5-2;H0Y5R3;G3XAF1;Q5TEE8;Q6AI25	Q9NRZ5;Q9NRZ5-2	13;7;3;2;2;1	13;7;3;2;2;1	13;7;3;2;2;1	1-acyl-sn-glycerol-3-phosphate acyltransferase delta	AGPAT4	sp|Q9NRZ5|PLCD_HUMAN 1-acyl-sn-glycerol-3-phosphate acyltransferase delta OS=Homo sapiens OX=9606 GN=AGPAT4 PE=1 SV=1;sp|Q9NRZ5-2|PLCD_HUMAN Isoform 2 of 1-acyl-sn-glycerol-3-phosphate acyltransferase delta OS=Homo sapiens OX=9606 GN=AGPAT4	6	13	13	13	36	36	36	44021	378	378;216;105;133;159;118	0	95027	2795400000	116480000	13				1064	742;1478;1786;2090;2422;2892;4032;4392;5599;5814;6524;6619;6646	True;True;True;True;True;True;True;True;True;True;True;True;True	798;1586;1911;2233;2585;3078;4277;4720;5987;6217;6967;7070;7099	1195;2475;2867;3328;4036;4817;4818;6517;7236;9147;9472;10549;10702;10734	1255;2675;3079;3572;4391;5262;5263;7070;7862;9924;10272;11412;11574;11606	1255;2675;3079;3572;4391;5263;7070;7862;9924;10272;11412;11574;11606	530;531	189;299
P34932;A0A087WYC1;A0A087WTS8;P34932-2	P34932;A0A087WYC1	35;23;15;3	35;23;15;3	32;20;12;3	Heat shock 70 kDa protein 4	HSPA4	sp|P34932|HSP74_HUMAN Heat shock 70 kDa protein 4 OS=Homo sapiens OX=9606 GN=HSPA4 PE=1 SV=4;tr|A0A087WYC1|A0A087WYC1_HUMAN Heat shock 70 kDa protein 4 OS=Homo sapiens OX=9606 GN=HSPA4 PE=1 SV=1	4	35	35	32	55	55	50.5	94.33	840	840;699;475;148	0	323.31	7045000000	115490000	47				625	159;211;1219;1451;1468;1840;1915;1976;2037;3066;3070;3108;3288;3331;3656;3659;3683;3813;4171;4283;4293;4326;4714;4786;4883;5081;5283;5394;5430;5443;5781;5978;6118;6189;6525	True;True;True;True;True;True;True;True;True;True;True;True;True;True;True;True;True;True;True;True;True;True;True;True;True;True;True;True;True;True;True;True;True;True;True	173;174;229;1304;1305;1548;1573;1967;2048;2114;2177;3261;3265;3304;3492;3537;3875;3878;3904;4037;4470;4471;4599;4600;4610;4645;5054;5130;5228;5438;5439;5653;5769;5770;5808;5821;6179;6387;6536;6610;6968	266;267;332;1918;1919;1920;1921;2409;2461;2933;3040;3041;3151;3152;3227;5109;5114;5163;5164;5398;5473;5981;5984;5985;6016;6182;6844;6845;6846;7076;7077;7088;7141;7673;7804;7945;8223;8224;8594;8744;8745;8790;8808;9385;9677;9871;9995;10550	280;281;346;2034;2035;2036;2037;2606;2661;3147;3256;3257;3373;3374;3449;5566;5571;5624;5625;5864;5959;6505;6508;6509;6541;6709;7430;7431;7432;7695;7696;7707;7764;8325;8463;8621;8905;8906;9304;9462;9463;9508;9526;10176;10484;10682;10824;11413	281;346;2036;2606;2661;3147;3257;3374;3449;5566;5571;5624;5864;5959;6505;6509;6541;6709;7432;7695;7707;7764;8325;8463;8621;8905;9304;9463;9508;9526;10176;10484;10682;10824;11413	303;304;305;306;307;308;309	120;510;522;549;710;731;745
P24390;M0R1Y2;P24390-2	P24390;M0R1Y2;P24390-2	4;3;2	4;3;2	3;2;1	ER lumen protein-retaining receptor 1;ER lumen protein-retaining receptor	KDELR1	sp|P24390|ERD21_HUMAN ER lumen protein-retaining receptor 1 OS=Homo sapiens OX=9606 GN=KDELR1 PE=1 SV=1;tr|M0R1Y2|M0R1Y2_HUMAN ER lumen protein-retaining receptor 1 (Fragment) OS=Homo sapiens OX=9606 GN=KDELR1 PE=1 SV=1;sp|P24390-2|ERD21_HUMAN Isoform 2 of	3	4	4	3	2020-08-27	2020-08-27	2020-06-22	24542	212	212;220;150	0	91434	1150000000	115000000	7				593	548;5335;5583;6687	True;True;True;True	590;5707;5971;7146	889;890;8659;8660;8661;9124;9125;10794	927;928;9370;9371;9372;9899;9900;11668	928;9371;9899;11668
Q9BVK6	Q9BVK6	7	6	6	Transmembrane emp24 domain-containing protein 9	TMED9	sp|Q9BVK6|TMED9_HUMAN Transmembrane emp24 domain-containing protein 9 OS=Homo sapiens OX=9606 GN=TMED9 PE=1 SV=2	1	7	6	6	35.7	2020-05-28	2020-05-28	27277	235	235	0	84007	2169900000	114210000	10				1020	644;1275;1937;3806;4842;4876;6048	False;True;True;True;True;True;True	693;694;1366;2071;2072;4029;5186;5221;6463	1046;1047;1048;2057;3072;3073;3074;6172;7894;7936;7937;9774	1100;1101;1102;2195;3288;3289;3290;3291;6699;8570;8612;8613;10583	1102;2195;3291;6699;8570;8613;10583	436;505	59;136
P40855;Q5QNY5;P40855-5;H0YJ60;B7Z8B3;E9PS71	P40855;Q5QNY5;P40855-5;H0YJ60	13;11;10;7;5;4	13;11;10;7;5;4	8;7;5;2;5;4	Peroxisomal biogenesis factor 19	PEX19	sp|P40855|PEX19_HUMAN Peroxisomal biogenesis factor 19 OS=Homo sapiens OX=9606 GN=PEX19 PE=1 SV=1;tr|Q5QNY5|Q5QNY5_HUMAN Peroxisomal biogenesis factor 19 (Fragment) OS=Homo sapiens OX=9606 GN=PEX19 PE=1 SV=1;sp|P40855-5|PEX19_HUMAN Isoform 5 of Peroxisomal	6	13	13	8	67.6	67.6	38.8	32806	299	299;235;261;304;186;166	0	323.31	2106300000	110860000	24				637	7;289;386;752;1388;1595;1752;2641;4237;4629;6037;6740;6755	True;True;True;True;True;True;True;True;True;True;True;True;True	7;314;417;418;419;808;1482;1705;1875;2815;4549;4550;4969;6451;7203;7218;7219	7;448;449;648;649;650;651;1209;2324;2325;2619;2823;4474;6951;6952;7580;9757;10856;10857;10885;10886;10887;10888	7;466;467;678;679;680;681;1271;2518;2519;2830;3035;4897;4898;7544;7545;8231;10566;11731;11732;11762;11763;11764;11765	7;467;681;1271;2519;2830;3035;4897;7545;8231;10566;11732;11765	109;110;111;318	148;157;162;225
K7ESE6;Q9BUM1	K7ESE6;Q9BUM1	2;2	2;2	2;2	Glucose-6-phosphatase 3	G6PC3	tr|K7ESE6|K7ESE6_HUMAN Glucose-6-phosphatase 3 (Fragment) OS=Homo sapiens OX=9606 GN=G6PC3 PE=1 SV=1;sp|Q9BUM1|G6PC3_HUMAN Glucose-6-phosphatase 3 OS=Homo sapiens OX=9606 GN=G6PC3 PE=1 SV=2	2	2	2	2	2020-05-11	2020-05-11	2020-05-11	27607	243	243;346	0	149.36	1104700000	110470000	3				402	1054;4518	True;True	1126;4853	1705;1706;7442	1811;1812;8092	1812;8092
P27449	P27449	2	2	2	V-type proton ATPase 16 kDa proteolipid subunit	ATP6V0C	sp|P27449|VATL_HUMAN V-type proton ATPase 16 kDa proteolipid subunit OS=Homo sapiens OX=9606 GN=ATP6V0C PE=1 SV=1	1	2	2	2	31.6	31.6	31.6	15736	155	155	0	23727	550490000	110100000	4				601	5134;5138	True;True	5498;5503	8304;8309;8310	8986;8991;8992;8993	8986;8992
P84157-2;P84157-3;P84157;Q6ZR64;K7EQX8	P84157-2;P84157-3;P84157;Q6ZR64	4;3;3;2;1	4;3;3;2;1	4;3;3;2;1	Matrix-remodeling-associated protein 7	MXRA7	sp|P84157-2|MXRA7_HUMAN Isoform 2 of Matrix-remodeling-associated protein 7 OS=Homo sapiens OX=9606 GN=MXRA7;sp|P84157-3|MXRA7_HUMAN Isoform 3 of Matrix-remodeling-associated protein 7 OS=Homo sapiens OX=9606 GN=MXRA7;sp|P84157|MXRA7_HUMAN Matrix-remodelin	5	4	4	4	2020-04-29	2020-04-29	2020-04-29	17493	170	170;177;204;213;15	0	56647	878040000	109750000	4				725	1257;2006;2272;4726	True;True;True;True	1345;2144;2425;5066	1968;3188;3643;7691	2088;3410;3941;8343	2088;3410;3941;8343
Q6ZMG9;Q6ZMG9-2	Q6ZMG9;Q6ZMG9-2	7;7	7;7	6;6	Ceramide synthase 6	CERS6	sp|Q6ZMG9|CERS6_HUMAN Ceramide synthase 6 OS=Homo sapiens OX=9606 GN=CERS6 PE=1 SV=1;sp|Q6ZMG9-2|CERS6_HUMAN Isoform 2 of Ceramide synthase 6 OS=Homo sapiens OX=9606 GN=CERS6	2	7	7	6	2020-09-21	2020-09-21	2020-01-20	44889	384	384;392	0	62223	2080800000	109510000	10				832	215;1703;4510;4803;5746;6010;6039	True;True;True;True;True;True;True	233;1821;4845;5147;6141;6422;6453	337;2760;7429;7822;9334;9721;9759;9760;9761;9762	351;2971;8074;8481;10115;10530;10568;10569;10570;10571	351;2971;8074;8481;10115;10530;10569	107	136
P18031;B4DSN5	P18031;B4DSN5	19;14	19;14	19;14	Tyrosine-protein phosphatase non-receptor type 1;Tyrosine-protein phosphatase non-receptor type	PTPN1	sp|P18031|PTN1_HUMAN Tyrosine-protein phosphatase non-receptor type 1 OS=Homo sapiens OX=9606 GN=PTPN1 PE=1 SV=1;tr|B4DSN5|B4DSN5_HUMAN Tyrosine-protein phosphatase non-receptor type OS=Homo sapiens OX=9606 GN=PTPN1 PE=1 SV=1	2	19	19	19	48.5	48.5	48.5	49966	435	435;362	0	184.46	3722000000	109470000	24				577	629;796;1013;1014;1118;1281;1445;1466;1948;2310;2385;2419;2792;3440;4091;4806;5137;5459;6765	True;True;True;True;True;True;True;True;True;True;True;True;True;True;True;True;True;True;True	678;853;1083;1084;1195;1373;1542;1569;1570;2083;2466;2547;2548;2582;2969;3652;4354;5150;5502;5838;7229	1030;1278;1655;1656;1794;2065;2066;2403;2456;2457;3088;3805;3806;3989;3990;4033;4687;4688;5646;5647;6617;7825;8308;8859;10900	1084;1344;1758;1759;1904;2203;2204;2600;2656;2657;3305;4135;4136;4344;4345;4388;5127;5128;6148;6149;7173;8485;8990;9585;11777	1084;1344;1758;1759;1904;2204;2600;2656;3305;4135;4344;4388;5128;6148;7173;8485;8990;9585;11777	276;277;278	109;133;258
Q8NCS4;A0A2R8YCV2	Q8NCS4;A0A2R8YCV2	2;1	2;1	2;1	Uncharacterized protein ZMYM6NB	ZMYM6NB	sp|Q8NCS4|TM35B_HUMAN Transmembrane protein 35B OS=Homo sapiens OX=9606 GN=TMEM35B PE=1 SV=1;tr|A0A2R8YCV2|A0A2R8YCV2_HUMAN Uncharacterized protein OS=Homo sapiens OX=9606 PE=4 SV=1	2	2	2	2	2020-05-17	2020-05-17	2020-05-17	16884	154	154;55	0	21832	647790000	107960000	2				899	3803;4143	True;True	4026;4433	6169;6804	6696;7389	6696;7389
J3QL46	J3QL46	1	1	1		PER1	tr|J3QL46|J3QL46_HUMAN Period circadian protein homolog 1 (Fragment) OS=Homo sapiens OX=9606 GN=PER1 PE=1 SV=1	1	1	1	1	2020-02-04	2020-02-04	2020-02-04	17748	168	168	1	-2	754130000	107730000	1	+			380	6477	True	6918	10494	11354	11354	130	114
Q8TCJ2	Q8TCJ2	16	15	15	Dolichyl-diphosphooligosaccharide--protein glycosyltransferase subunit STT3B	STT3B	sp|Q8TCJ2|STT3B_HUMAN Dolichyl-diphosphooligosaccharide--protein glycosyltransferase subunit STT3B OS=Homo sapiens OX=9606 GN=STT3B PE=1 SV=1	1	16	15	15	2020-04-26	2020-07-25	2020-07-25	93673	826	826	0	143.1	4263700000	106590000	19				911	34;229;1092;1192;1457;1494;1756;1778;1880;2002;2485;4229;4318;5385;5539;5762	True;True;True;True;True;True;True;True;False;True;True;True;True;True;True;True	38;248;249;1167;1275;1554;1602;1879;1903;2008;2009;2140;2651;4540;4637;5759;5922;6158	92;352;353;1761;1885;2418;2491;2829;2858;2982;2983;3184;4130;6940;7132;8731;8732;8981;9354	96;97;366;367;1871;1999;2615;2616;2691;3041;3070;3196;3197;3406;4487;7533;7754;9449;9450;9717;10135	97;367;1871;1999;2615;2691;3041;3070;3197;3406;4487;7533;7754;9450;9717;10135	320;461	678;717
J3KT68;Q5BJF2	J3KT68;Q5BJF2	2;2	2;2	2;2	Transmembrane protein 97	TMEM97	tr|J3KT68|J3KT68_HUMAN Sigma intracellular receptor 2 OS=Homo sapiens OX=9606 GN=TMEM97 PE=1 SV=1;sp|Q5BJF2|SGMR2_HUMAN Sigma intracellular receptor 2 OS=Homo sapiens OX=9606 GN=TMEM97 PE=1 SV=1	2	2	2	2	2020-07-21	2020-07-21	2020-07-21	10976	92	92;176	0	14811	531850000	106370000	2				378	1001;1459	True;True	1071;1556	1642;2423	1745;2621	1745;2621
O95070;A6NGW1;E9PIZ0;C9JST7;E9PS11;E9PP02	O95070;A6NGW1;E9PIZ0;C9JST7	5;4;3;3;1;1	5;4;3;3;1;1	5;4;3;3;1;1	Protein YIF1A	YIF1A	sp|O95070|YIF1A_HUMAN Protein YIF1A OS=Homo sapiens OX=9606 GN=YIF1A PE=1 SV=2;tr|A6NGW1|A6NGW1_HUMAN Protein YIF1A OS=Homo sapiens OX=9606 GN=YIF1A PE=1 SV=1;tr|E9PIZ0|E9PIZ0_HUMAN Protein YIF1A (Fragment) OS=Homo sapiens OX=9606 GN=YIF1A PE=1 SV=1;tr|C9J	6	5	5	5	2020-09-24	2020-09-24	2020-09-24	32011	293	293;241;160;199;79;158	0	42419	1061500000	106150000	7				496	618;3404;5065;5464;6617	True;True;True;True;True	667;3614;5422;5843;5844;7068	1016;1017;5597;8207;8864;8865;10700	1069;1070;6098;8889;9590;9591;11572	1069;6098;8889;9591;11572	187	259
Q53GQ0;A0A1B0GV93;A0A1B0GVY6;E9PI21;A0A1B0GW85;A0A1B0GU83;Q53GQ0-2	Q53GQ0;A0A1B0GV93;A0A1B0GVY6	11;8;6;4;1;1;1	11;8;6;4;1;1;1	11;8;6;4;1;1;1	Very-long-chain 3-oxoacyl-CoA reductase	HSD17B12	sp|Q53GQ0|DHB12_HUMAN Very-long-chain 3-oxoacyl-CoA reductase OS=Homo sapiens OX=9606 GN=HSD17B12 PE=1 SV=2;tr|A0A1B0GV93|A0A1B0GV93_HUMAN Very-long-chain 3-oxoacyl-CoA reductase OS=Homo sapiens OX=9606 GN=HSD17B12 PE=1 SV=1;tr|A0A1B0GVY6|A0A1B0GVY6_HUMAN	7	11	11	11	46.2	46.2	46.2	34324	312	312;276;178;164;103;111;98	0	104.41	1895800000	105320000	14				793	909;2021;2360;2962;3008;3271;4104;4197;5575;5620;5715	True;True;True;True;True;True;True;True;True;True;True	971;2159;2519;3150;3198;3475;4370;4371;4500;4501;5963;6010;6109	1444;3207;3208;3940;4913;4980;5378;6634;6635;6877;6878;9113;9179;9297	1520;3429;3430;4292;5358;5425;5844;7190;7191;7463;7464;9888;9960;10078	1520;3430;4292;5358;5425;5844;7191;7463;9888;9960;10078	415;416	157;168
G3XAN4;Q15629-2;Q15629	G3XAN4;Q15629-2;Q15629	3;3;3	3;3;3	3;3;3	Translocating chain-associated membrane protein 1	TRAM1	tr|G3XAN4|G3XAN4_HUMAN Translocating chain-associated membrane protein 1 OS=Homo sapiens OX=9606 GN=TRAM1 PE=1 SV=1;sp|Q15629-2|TRAM1_HUMAN Isoform 2 of Translocating chain-associated membrane protein 1 OS=Homo sapiens OX=9606 GN=TRAM1;sp|Q15629|TRAM1_HUMA	3	3	3	3	2020-09-14	2020-09-14	2020-09-14	33435	288	288;343;374	0	21575	1575600000	105040000	3				312	622;1349;3080	True;True;True	671;1442;3276	1021;2273;2274;5127	1074;2467;2468;5584	1074;2468;5584
Q96N66;Q96N66-2;Q96N66-3;H7C2M4;C9J4E9;A0A0G2JNX6;A9C4B8;M0R1Z5	Q96N66;Q96N66-2;Q96N66-3	7;6;5;2;2;2;2;1	7;6;5;2;2;2;2;1	7;6;5;2;2;2;2;1	Lysophospholipid acyltransferase 7	MBOAT7	sp|Q96N66|MBOA7_HUMAN Lysophospholipid acyltransferase 7 OS=Homo sapiens OX=9606 GN=MBOAT7 PE=1 SV=2;sp|Q96N66-2|MBOA7_HUMAN Isoform 2 of Lysophospholipid acyltransferase 7 OS=Homo sapiens OX=9606 GN=MBOAT7;sp|Q96N66-3|MBOA7_HUMAN Isoform 3 of Lysophosphol	8	7	7	7	2020-04-18	2020-04-18	2020-04-18	52764	472	472;399;344;123;170;172;256;181	0	63866	2399700000	104330000	8				975	71;72;210;607;1460;3954;4308	True;True;True;True;True;True;True	77;78;228;655;1557;4183;4627	140;141;331;1002;1003;2424;6377;7119	145;146;345;1055;1056;2622;6915;7741	145;146;345;1055;2622;6915;7741
P51151;REV__Q9NZZ3-2;REV__Q9NZZ3;Q9NP90	P51151	8;1;1;1	8;1;1;1	8;1;1;1	Ras-related protein Rab-9A	RAB9A	sp|P51151|RAB9A_HUMAN Ras-related protein Rab-9A OS=Homo sapiens OX=9606 GN=RAB9A PE=1 SV=1	4	8	8	8	46.8	46.8	46.8	22837	201	201;171;219;201	0	105.23	1770100000	104120000	13				663	764;968;1505;1730;2659;4925;5059;5362	True;True;True;True;True;True;True;True	821;1035;1613;1850;2834;5272;5412;5735	1227;1228;1600;2502;2793;2794;4498;8004;8192;8193;8194;8692	1289;1290;1702;2703;3005;3006;4922;8683;8873;8874;8875;8876;9403	1289;1702;2703;3006;4922;8683;8876;9403
F8VQW0;F8VX73;F8VPI1;F8W201;F8W086;F8VR05;F8VQQ5;F8VSI7;F8VVJ4;P55061;P55061-2;F8W1G3	F8VQW0;F8VX73;F8VPI1;F8W201;F8W086;F8VR05;F8VQQ5;F8VSI7;F8VVJ4;P55061;P55061-2;F8W1G3	2;2;2;2;2;2;2;2;2;2;2;1	2;2;2;2;2;2;2;2;2;2;2;1	2;2;2;2;2;2;2;2;2;2;2;1	Bax inhibitor 1	TMBIM6	tr|F8VQW0|F8VQW0_HUMAN Bax inhibitor 1 (Fragment) OS=Homo sapiens OX=9606 GN=TMBIM6 PE=1 SV=1;tr|F8VX73|F8VX73_HUMAN Bax inhibitor 1 (Fragment) OS=Homo sapiens OX=9606 GN=TMBIM6 PE=1 SV=1;tr|F8VPI1|F8VPI1_HUMAN Bax inhibitor 1 (Fragment) OS=Homo sapiens OX	12	2	2	2	51.2	51.2	51.2	47756	41	41;44;89;95;108;113;130;138;145;237;295;16	0	14183	416400000	104100000	2				293	1936;2862	True;True	2070;3047	3071;4784	3287;5228	3287;5228
Q96KA5;Q96KA5-2;G5E9Z2	Q96KA5;Q96KA5-2;G5E9Z2	15;15;14	15;15;14	15;15;14	Cleft lip and palate transmembrane protein 1-like protein	CLPTM1L	sp|Q96KA5|CLP1L_HUMAN Cleft lip and palate transmembrane protein 1-like protein OS=Homo sapiens OX=9606 GN=CLPTM1L PE=1 SV=1;sp|Q96KA5-2|CLP1L_HUMAN Isoform 2 of Cleft lip and palate transmembrane protein 1-like protein OS=Homo sapiens OX=9606 GN=CLPTM1L;t	3	15	15	15	37	37	37	62228	538	538;502;369	0	149.14	3527800000	103760000	27				972	183;2215;3129;3186;4193;4911;5003;5265;5402;5409;5542;5824;6227;6523;6709	True;True;True;True;True;True;True;True;True;True;True;True;True;True;True	200;2363;2364;3326;3327;3387;4495;5256;5257;5355;5633;5779;5786;5926;5927;6227;6651;6966;7168	296;3543;3544;5194;5195;5196;5197;5277;5278;5279;6872;7981;7982;7983;8127;8572;8756;8765;8985;8986;9485;10068;10548;10817	310;3823;3824;5655;5656;5657;5658;5741;5742;5743;7458;8658;8659;8660;8661;8808;9282;9474;9483;9721;9722;10285;10286;10287;10902;11411;11691	310;3824;5658;5743;7458;8660;8808;9282;9474;9483;9721;10287;10902;11411;11691	486;487;488	134;378;401
Q9NP72;Q9NP72-2;A0A087X163;Q5W0J0;H0Y6T8;Q9NP72-3;E9PKD2;B7ZAV2	Q9NP72;Q9NP72-2;A0A087X163;Q5W0J0;H0Y6T8;Q9NP72-3	10;9;8;6;6;6;1;1	10;9;8;6;6;6;1;1	9;8;7;5;6;5;0;0	Ras-related protein Rab-18	RAB18	sp|Q9NP72|RAB18_HUMAN Ras-related protein Rab-18 OS=Homo sapiens OX=9606 GN=RAB18 PE=1 SV=1;sp|Q9NP72-2|RAB18_HUMAN Isoform 2 of Ras-related protein Rab-18 OS=Homo sapiens OX=9606 GN=RAB18;tr|A0A087X163|A0A087X163_HUMAN Ras-related protein Rab-18 OS=Homo s	8	10	10	9	57.3	57.3	54.4	22977	206	206;235;182;161;291;142;495;916	0	85134	1654300000	103390000	10				1052	1617;1953;2030;2769;2808;3180;4250;5361;5509;5697	True;True;True;True;True;True;True;True;True;True	1730;2088;2170;2944;2985;3381;4565;5734;5892;6089	2647;3094;3220;4647;4707;5267;6969;8691;8940;9274;9275	2858;3311;3442;5085;5147;5731;7562;9402;9670;10055;10056	2858;3311;3442;5085;5147;5731;7562;9402;9670;10055
O43505	O43505	10	10	10	Beta-1,4-glucuronyltransferase 1	B4GAT1	sp|O43505|B4GA1_HUMAN Beta-1,4-glucuronyltransferase 1 OS=Homo sapiens OX=9606 GN=B4GAT1 PE=1 SV=1	1	10	10	10	34.5	34.5	34.5	47119	415	415	0	126.7	2471600000	102980000	15				453	1233;1467;1507;5045;5477;5803;5902;6493;6587;6748	True;True;True;True;True;True;True;True;True;True	1319;1320;1571;1572;1615;5398;5858;6204;6205;6308;6934;7037;7211	1937;1938;2458;2459;2460;2504;8177;8883;9441;9442;9583;9584;10514;10658;10878	2053;2054;2658;2659;2660;2705;8858;9609;10239;10240;10389;10390;11377;11530;11755	2054;2660;2705;8858;9609;10239;10390;11377;11530;11755	165;166;167	90;149;243
J3QT77;A0A0J9YYG4;A0A0J9YXF2;Q15165-3;Q15165;Q15165-1;G3XAK4;A0A2Q2SAK4;A0A0J9YXM1;A0A0J9YYJ1;A0A0J9YXU7	J3QT77;A0A0J9YYG4;A0A0J9YXF2;Q15165-3;Q15165;Q15165-1;G3XAK4	9;9;9;9;9;8;6;2;2;2;1	9;9;9;9;9;8;6;2;2;2;1	9;9;9;9;9;8;6;2;2;2;1	Serum paraoxonase/arylesterase 2	PON2	tr|J3QT77|J3QT77_HUMAN Serum paraoxonase/arylesterase 2 OS=Homo sapiens OX=9606 GN=PON2 PE=1 SV=1;tr|A0A0J9YYG4|A0A0J9YYG4_HUMAN Serum paraoxonase/arylesterase 2 OS=Homo sapiens OX=9606 GN=PON2 PE=1 SV=1;tr|A0A0J9YXF2|A0A0J9YXF2_HUMAN Paraoxonase 2, isofor	11	9	9	9	37.4	37.4	37.4	37.98	342	342;354;375;342;354;354;219;50;84;122;113	0	97.13	1948000000	102530000	11				72	1623;1900;1901;2424;3358;3563;3904;4537;6382	True;True;True;True;True;True;True;True;True	1736;2033;2034;2587;3566;3776;4133;4872;6815	2654;3021;3022;3023;4038;5533;5857;6316;6317;7461;10334	2865;3237;3238;3239;4393;6032;6381;6853;6854;8111;11182	2865;3237;3239;4393;6032;6381;6854;8111;11182
Q96JJ7;Q96JJ7-2;B4DIE3;H3BPB3;H3BT89;H3BVI1;H3BRY0	Q96JJ7;Q96JJ7-2	14;7;4;3;2;2;1	14;7;4;3;2;2;1	14;7;4;3;2;2;1	Protein disulfide-isomerase TMX3	TMX3	sp|Q96JJ7|TMX3_HUMAN Protein disulfide-isomerase TMX3 OS=Homo sapiens OX=9606 GN=TMX3 PE=1 SV=2;sp|Q96JJ7-2|TMX3_HUMAN Isoform 2 of Protein disulfide-isomerase TMX3 OS=Homo sapiens OX=9606 GN=TMX3	7	14	14	14	36.3	36.3	36.3	51871	454	454;195;197;128;69;89;63	0	251.75	2967800000	102340000	17				970	784;1538;2047;2115;2995;3099;3902;4025;4466;5098;5162;5387;5651;5996	True;True;True;True;True;True;True;True;True;True;True;True;True;True	841;1646;2188;2258;3184;3295;4131;4267;4268;4798;5459;5527;5761;6041;6405	1253;1254;2542;3238;3354;4962;5150;5151;6314;6506;6507;7357;7358;8249;8344;8734;9215;9699	1317;1318;2743;3460;3598;5407;5609;5610;6851;7059;7060;8000;8001;8931;9028;9452;9996;10508	1317;2743;3460;3598;5407;5609;6851;7060;8001;8931;9028;9452;9996;10508	485	82
Q9Y230-2;Q9Y230;M0R0Y3;X6R2L4;M0QXI6	Q9Y230-2;Q9Y230;M0R0Y3	13;13;11;3;2	13;13;11;3;2	13;13;11;3;2	RuvB-like 2	RUVBL2	sp|Q9Y230-2|RUVB2_HUMAN Isoform 2 of RuvB-like 2 OS=Homo sapiens OX=9606 GN=RUVBL2;sp|Q9Y230|RUVB2_HUMAN RuvB-like 2 OS=Homo sapiens OX=9606 GN=RUVBL2 PE=1 SV=3;tr|M0R0Y3|M0R0Y3_HUMAN RuvB-like helicase OS=Homo sapiens OX=9606 GN=RUVBL2 PE=1 SV=1	5	13	13	13	39	39	39	46306	418	418;463;354;259;109	0	150.27	2813900000	100500000	17				1121	38;315;1126;1652;1672;1973;2328;2343;3564;5536;5752;5788;5889	True;True;True;True;True;True;True;True;True;True;True;True;True	42;341;1203;1204;1768;1790;2111;2485;2502;3777;5919;6148;6188;6295	97;480;481;1802;1803;2692;2693;2694;2718;3148;3899;3900;3920;5858;8978;9341;9401;9568	102;498;499;1912;1913;2903;2904;2905;2929;3370;4249;4250;4270;6382;9714;10122;10194;10374	102;498;1913;2905;2929;3370;4249;4270;6382;9714;10122;10194;10374	564;565	123;173
Q9GZP9;I3L1T3;I3L1S8;I3L0R8;I3L3R8;I3L4W7;K7EQE8;I3L1W3	Q9GZP9;I3L1T3;I3L1S8;I3L0R8	4;3;2;2;1;1;1;1	4;3;2;2;1;1;1;1	3;2;1;1;1;1;1;1	Derlin-2	DERL2	sp|Q9GZP9|DERL2_HUMAN Derlin-2 OS=Homo sapiens OX=9606 GN=DERL2 PE=1 SV=1;tr|I3L1T3|I3L1T3_HUMAN Derlin (Fragment) OS=Homo sapiens OX=9606 GN=DERL2 PE=1 SV=1;tr|I3L1S8|I3L1S8_HUMAN Derlin OS=Homo sapiens OX=9606 GN=DERL2 PE=1 SV=1;tr|I3L0R8|I3L0R8_HUMAN De	8	4	4	3	2020-05-20	2020-05-20	2020-02-17	27567	239	239;158;144;200;74;79;82;103	0	34876	901590000	100180000	5				1026	263;3326;4115;4536	True;True;True;True	285;3532;4387;4871	412;5466;5467;6653;7460	430;5951;5952;5953;7210;8110	430;5952;7210;8110	489	84
P27544-2;P27544;M0R0T2;Q5XG75	P27544-2;P27544;M0R0T2;Q5XG75	9;9;5;5	9;9;5;5	9;9;5;5	Ceramide synthase 1	CERS1;LASS1	sp|P27544-2|CERS1_HUMAN Isoform 2 of Ceramide synthase 1 OS=Homo sapiens OX=9606 GN=CERS1;sp|P27544|CERS1_HUMAN Ceramide synthase 1 OS=Homo sapiens OX=9606 GN=CERS1 PE=1 SV=1;tr|M0R0T2|M0R0T2_HUMAN Ceramide synthase 1 (Fragment) OS=Homo sapiens OX=9606 GN=	4	9	9	9	32.3	32.3	32.3	37983	337	337;350;216;239	0	91839	1702100000	100120000	12				602	12;631;1666;1667;2041;2186;3681;6190;6208	True;True;True;True;True;True;True;True;True	13;680;1783;1784;2181;2333;3902;6611;6629	14;1032;2711;2712;3231;3506;3507;6013;9996;9997;10041;10042	14;1086;2922;2923;3453;3786;3787;6538;10825;10826;10875;10876	14;1086;2922;2923;3453;3786;6538;10825;10876
P10809;E7ESH4;E7EXB4;C9JL25;P10809-2;C9JL19;C9JCQ4;C9J0S9	P10809	16;7;6;3;3;2;2;1	16;7;6;3;3;2;2;1	16;7;6;3;3;2;2;1	60 kDa heat shock protein, mitochondrial	HSPD1	sp|P10809|CH60_HUMAN 60 kDa heat shock protein, mitochondrial OS=Homo sapiens OX=9606 GN=HSPD1 PE=1 SV=2	8	16	16	16	40.3	40.3	40.3	61054	573	573;234;221;175;158;83;94;58	0	225.59	3805900000	97587000	26				547	344;659;774;1362;2396;2956;3798;3948;4231;4658;5481;5681;5827;6025;6032;6348	True;True;True;True;True;True;True;True;True;True;True;True;True;True;True;True	371;709;831;1455;2559;3144;4021;4177;4542;4998;5862;6071;6072;6230;6437;6445;6779	549;550;551;552;553;1066;1241;2290;4003;4902;4903;6164;6371;6942;7611;8887;8888;8889;8890;8891;8892;8893;9245;9246;9489;9739;9750;10291	569;570;571;572;573;1120;1305;2484;4358;5347;5348;6690;6909;7535;8262;9613;9614;9615;9616;9617;9618;9619;10026;10027;10291;10548;10559;11139	569;1120;1305;2484;4358;5348;6690;6909;7535;8262;9613;10027;10291;10548;10559;11139	235;236	217;356
O15269;A0A2R8Y4S0;A0A2R8Y6A2;O15269-2;A0A2R8Y763	O15269	12;3;3;3;1	12;3;3;3;1	12;3;3;3;1	Serine palmitoyltransferase 1	SPTLC1	sp|O15269|SPTC1_HUMAN Serine palmitoyltransferase 1 OS=Homo sapiens OX=9606 GN=SPTLC1 PE=1 SV=1	5	12	12	12	2020-03-28	2020-03-28	2020-03-28	52743	473	473;143;144;143;22	0	126.95	2714400000	96944000	16				443	14;17;681;867;1522;2520;2693;3602;4971;5119;6397;6643	True;True;True;True;True;True;True;True;True;True;True;True	15;18;732;927;1630;2687;2688;2868;3815;5321;5482;6830;7095	16;19;1097;1366;1367;2522;4226;4227;4542;5905;8084;8280;8281;10351;10730	16;19;1151;1434;1435;1436;2723;4610;4611;4968;6429;8765;8962;8963;11201;11602	16;19;1151;1436;2723;4611;4968;6429;8765;8962;11201;11602	161	214
K7ELL7;P14314-2;P14314;K7EPW7;A0A0C4DGP4;K7EKX1;K7EJ70;K7EIP3;H0Y6C0;F8WB94;Q9P2L0-2;Q9P2L0	K7ELL7;P14314-2;P14314	14;13;13;4;4;2;2;1;1;1;1;1	14;13;13;4;4;2;2;1;1;1;1;1	14;13;13;4;4;2;2;1;1;1;1;1	Glucosidase 2 subunit beta	PRKCSH	tr|K7ELL7|K7ELL7_HUMAN Glucosidase 2 subunit beta OS=Homo sapiens OX=9606 GN=PRKCSH PE=1 SV=1;sp|P14314-2|GLU2B_HUMAN Isoform 2 of Glucosidase 2 subunit beta OS=Homo sapiens OX=9606 GN=PRKCSH;sp|P14314|GLU2B_HUMAN Glucosidase 2 subunit beta OS=Homo sapiens	12	14	14	14	2020-05-29	2020-05-29	2020-05-29	60192	535	535;525;528;168;200;140;144;62;406;873;1170;1181	0	186.16	2792600000	96295000	17				391	456;1185;1568;1596;1736;2380;3454;3455;3968;4157;5077;5200;6604;6766	True;True;True;True;True;True;True;True;True;True;True;True;True;True	493;1267;1678;1706;1707;1857;2542;3666;3667;4199;4452;5434;5566;7054;7230	767;1877;2587;2620;2621;2805;3983;5666;5667;5668;6400;6825;6826;8219;8403;10679;10901	803;1991;2797;2831;2832;3017;4337;6169;6170;6171;6939;7410;7411;7412;8901;9092;11551;11778	803;1991;2797;2832;3017;4337;6169;6170;6939;7411;8901;9092;11551;11778	131	497
Q9NRG9;Q9NRG9-2;F8VZ44;H3BU82;F8VUB6	Q9NRG9;Q9NRG9-2;F8VZ44;H3BU82	21;20;15;13;10	21;20;15;13;10	21;20;15;13;10	Aladin	AAAS	sp|Q9NRG9|AAAS_HUMAN Aladin OS=Homo sapiens OX=9606 GN=AAAS PE=1 SV=1;sp|Q9NRG9-2|AAAS_HUMAN Isoform 2 of Aladin OS=Homo sapiens OX=9606 GN=AAAS;tr|F8VZ44|F8VZ44_HUMAN Aladin OS=Homo sapiens OX=9606 GN=AAAS PE=1 SV=1;tr|H3BU82|H3BU82_HUMAN Aladin (Fragment	5	21	21	21	51.3	51.3	51.3	59573	546	546;513;422;358;277	0	211.89	3369800000	96281000	21				1059	699;705;1099;2125;2290;2620;2783;3224;3383;3547;3614;4447;4459;4650;5471;5495;6285;6441;6442;6463;6481	True;True;True;True;True;True;True;True;True;True;True;True;True;True;True;True;True;True;True;True;True	752;758;1175;2269;2446;2794;2960;3427;3593;3760;3829;4779;4791;4990;5852;5878;6713;6881;6882;6904;6922	1130;1138;1769;1770;3366;3752;4450;4677;5325;5568;5832;5833;5922;7335;7350;7603;8877;8919;10153;10450;10451;10477;10502	1186;1195;1879;1880;3610;4075;4871;5116;5791;6068;6355;6356;6446;7977;7992;8254;9603;9647;10989;11310;11311;11337;11365	1186;1195;1879;3610;4075;4871;5116;5791;6068;6355;6446;7977;7992;8254;9603;9647;10989;11310;11311;11337;11365	529	415
Q8NCR0;Q8NCR0-2;A0A087WY64	Q8NCR0	15;7;2	15;7;2	15;7;2	UDP-GalNAc:beta-1,3-N-acetylgalactosaminyltransferase 2	B3GALNT2	sp|Q8NCR0|B3GL2_HUMAN UDP-GalNAc:beta-1,3-N-acetylgalactosaminyltransferase 2 OS=Homo sapiens OX=9606 GN=B3GALNT2 PE=1 SV=1	3	15	15	15	51.6	51.6	51.6	56703	500	500;326;92	0	167.46	2978700000	96088000	19				898	1815;1942;2496;4338;4350;4646;5309;5518;5869;6100;6211;6379;6426;6545;6753	True;True;True;True;True;True;True;True;True;True;True;True;True;True;True	1941;2077;2662;4657;4670;4986;5680;5901;6273;6517;6633;6812;6866;6989;7216	2903;2904;3080;4192;4193;7160;7178;7599;8623;8624;8949;9540;9848;9849;10048;10331;10432;10577;10883	3116;3117;3297;4574;4575;7784;7802;8250;9333;9334;9679;10344;10659;10660;10882;11179;11292;11441;11442;11760	3117;3297;4574;7784;7802;8250;9333;9679;10344;10659;10882;11179;11292;11442;11760	459	443
P10599;P10599-2	P10599;P10599-2	4;3	4;3	4;3	Thioredoxin	TXN	sp|P10599|THIO_HUMAN Thioredoxin OS=Homo sapiens OX=9606 GN=TXN PE=1 SV=3;sp|P10599-2|THIO_HUMAN Isoform 2 of Thioredoxin OS=Homo sapiens OX=9606 GN=TXN	2	4	4	4	38.1	38.1	38.1	11737	105	105;85	0	26972	761680000	95210000	4				545	687;3282;4521;5474	True;True;True;True	739;3486;4856;5855	1105;5390;7445;8880	1159;5856;8095;9606	1159;5856;8095;9606
Q9UGP8;A6PVC9	Q9UGP8	29;5	29;5	29;5	Translocation protein SEC63 homolog	SEC63	sp|Q9UGP8|SEC63_HUMAN Translocation protein SEC63 homolog OS=Homo sapiens OX=9606 GN=SEC63 PE=1 SV=2	2	29	29	29	43	43	43	87996	760	760;161	0	291.24	4708900000	94177000	35				1105	612;689;765;778;1031;1074;1203;1540;1542;1675;2121;2568;2886;2971;3039;3109;3119;3478;3834;4266;4617;4638;4891;5072;5305;5527;5638;6159;6771	True;True;True;True;True;True;True;True;True;True;True;True;True;True;True;True;True;True;True;True;True;True;True;True;True;True;True;True;True	660;741;822;835;1102;1147;1288;1648;1650;1651;1793;2265;2738;3072;3159;3233;3305;3316;3690;4058;4059;4582;4956;4978;5236;5429;5676;5910;6028;6578;7236	1008;1107;1229;1230;1245;1676;1731;1899;2544;2545;2547;2548;2549;2721;3362;4290;4811;4925;4926;5043;5165;5182;5693;6205;6206;7016;7562;7590;7956;8214;8619;8968;9199;9952;9953;10909	1061;1162;1291;1292;1309;1779;1837;2013;2745;2746;2747;2749;2750;2751;2932;3606;4675;5255;5370;5371;5490;5626;5643;6196;6732;6733;7617;8212;8241;8633;8896;9329;9703;9980;10779;10780;11786	1061;1162;1292;1309;1779;1837;2013;2745;2751;2932;3606;4675;5255;5371;5490;5626;5643;6196;6732;7617;8212;8241;8633;8896;9329;9703;9980;10779;11786	560;561;562	372;666;704
Q86V85	Q86V85	6	6	6	Integral membrane protein GPR180	GPR180	sp|Q86V85|GP180_HUMAN Integral membrane protein GPR180 OS=Homo sapiens OX=9606 GN=GPR180 PE=2 SV=1	1	6	6	6	2020-05-20	2020-05-20	2020-05-20	49395	440	440	0	68.33	1373700000	91579000	6				854	2295;2707;2866;3774;3988;6195	True;True;True;True;True;True	2451;2882;3051;3997;4220;6616	3758;4557;4788;6134;6449;10003	4081;4983;5232;6660;7002;10832	4081;4983;5232;6660;7002;10832
J3KQ48;Q9Y3E5	J3KQ48;Q9Y3E5	6;6	6;6	6;6	Peptidyl-tRNA hydrolase 2, mitochondrial	PTRH2	tr|J3KQ48|J3KQ48_HUMAN Peptidyl-tRNA hydrolase 2, mitochondrial OS=Homo sapiens OX=9606 GN=PTRH2 PE=1 SV=1;sp|Q9Y3E5|PTH2_HUMAN Peptidyl-tRNA hydrolase 2, mitochondrial OS=Homo sapiens OX=9606 GN=PTRH2 PE=1 SV=1	2	6	6	6	50.6	50.6	50.6	19325	180	180;179	0	130.76	1096800000	91399000	8				375	407;4103;4121;5612;5753;5879	True;True;True;True;True;True	442;4369;4396;6001;6149;6284	679;6633;6675;9168;9169;9342;9343;9553	709;7189;7249;9946;9947;10123;10124;10359	709;7189;7249;9947;10123;10359
B1AH87;P30536	B1AH87;P30536	2;2	2;2	2;2	Translocator protein	TSPO	tr|B1AH87|B1AH87_HUMAN Putative peripheral benzodiazepine receptor-related protein (Fragment) OS=Homo sapiens OX=9606 GN=TSPO PE=1 SV=1;sp|P30536|TSPO_HUMAN Translocator protein OS=Homo sapiens OX=9606 GN=TSPO PE=1 SV=3	2	2	2	2	29	29	29	11896	107	107;169	0	12622	543000000	90500000	3				136	422;1968	True;True	458;2106	701;3142;3143	731;3364;3365	731;3365
P0DP25;P0DP24;P0DP23;H0Y7A7;E7ETZ0;E7EMB3;M0QZ52;F8WBR5;G3V479;Q96HY3;G3V226;G3V361;P27482	P0DP25;P0DP24;P0DP23;H0Y7A7;E7ETZ0;E7EMB3;M0QZ52;F8WBR5;G3V479;Q96HY3	6;6;6;6;5;5;4;3;3;3;2;2;1	6;6;6;6;5;5;4;3;3;3;2;2;1	6;6;6;6;5;5;4;3;3;3;2;2;1		CALM2;CALM1;CALM3	sp|P0DP25|CALM3_HUMAN Calmodulin-3 OS=Homo sapiens OX=9606 GN=CALM3 PE=1 SV=1;sp|P0DP24|CALM2_HUMAN Calmodulin-2 OS=Homo sapiens OX=9606 GN=CALM2 PE=1 SV=1;sp|P0DP23|CALM1_HUMAN Calmodulin-1 OS=Homo sapiens OX=9606 GN=CALM1 PE=1 SV=1;tr|H0Y7A7|H0Y7A7_HUMAN	13	6	6	6	43.6	43.6	43.6	16837	149	149;149;149;187;150;196;83;65;83;113;76;98;149	0	95441	809490000	89943000	8				321	129;838;1072;1073;1150;1161	True;True;True;True;True;True	141;896;1145;1146;1231;1242	230;1332;1728;1729;1730;1831;1844	244;1400;1834;1835;1836;1941;1942;1955	244;1400;1834;1835;1942;1955
Q9Y679;Q9Y679-3	Q9Y679;Q9Y679-3	10;9	10;9	10;9	Ancient ubiquitous protein 1	AUP1	sp|Q9Y679|AUP1_HUMAN Ancient ubiquitous protein 1 OS=Homo sapiens OX=9606 GN=AUP1 PE=1 SV=2;sp|Q9Y679-3|AUP1_HUMAN Isoform 2 of Ancient ubiquitous protein 1 OS=Homo sapiens OX=9606 GN=AUP1	2	10	10	10	32.2	32.2	32.2	45786	410	410;373	0	90775	2506400000	89514000	11				1144	1411;1637;1910;2074;2339;3719;4059;4815;5580;6299	True;True;True;True;True;True;True;True;True;True	1505;1752;2043;2215;2498;3940;4315;5159;5968;6728	2353;2674;3034;3278;3915;6063;6064;6566;7837;9118;9119;10171	2549;2885;3250;3503;4265;6589;6590;7120;8497;9893;9894;11007	2549;2885;3250;3503;4265;6589;7120;8497;9894;11007
Q9BTX1-6;Q9BTX1-5;Q9BTX1-2;Q9BTX1;Q9BTX1-4;Q9BTX1-3	Q9BTX1-6;Q9BTX1-5;Q9BTX1-2;Q9BTX1;Q9BTX1-4;Q9BTX1-3	15;15;15;15;9;9	15;15;15;15;9;9	15;15;15;15;9;9	Nucleoporin NDC1	NDC1	sp|Q9BTX1-6|NDC1_HUMAN Isoform 6 of Nucleoporin NDC1 OS=Homo sapiens OX=9606 GN=NDC1;sp|Q9BTX1-5|NDC1_HUMAN Isoform 5 of Nucleoporin NDC1 OS=Homo sapiens OX=9606 GN=NDC1;sp|Q9BTX1-2|NDC1_HUMAN Isoform 2 of Nucleoporin NDC1 OS=Homo sapiens OX=9606 GN=NDC1;s	6	15	15	15	40.8	40.8	40.8	63157	559	559;634;673;674;542;557	0	173.85	2416400000	89498000	20				1007	1196;1797;2551;2944;2984;3027;3477;3768;3769;3847;3976;4004;5226;6334;6682	True;True;True;True;True;True;True;True;True;True;True;True;True;True;True	1280;1281;1923;2721;3132;3172;3219;3689;3990;3991;4072;4073;4207;4239;5592;6765;7141	1890;1891;2879;2880;4267;4888;4943;4944;4945;5006;5692;6126;6127;6237;6238;6239;6409;6468;8435;10257;10789	2004;2005;3091;3092;4652;5333;5388;5389;5390;5451;6195;6652;6653;6772;6773;6774;6948;7021;9124;11097;11663	2004;3092;4652;5333;5390;5451;6195;6652;6653;6774;6948;7021;9124;11097;11663	500;501	261;341
P61026;A0A087WWB9	P61026	6;1	5;1	4;0	Ras-related protein Rab-10	RAB10	sp|P61026|RAB10_HUMAN Ras-related protein Rab-10 OS=Homo sapiens OX=9606 GN=RAB10 PE=1 SV=1	2	6	5	4	35	2020-05-29	26	22541	200	200;122	0	43829	1604000000	89114000	7				700	180;1512;1763;1805;3569;4309	True;True;True;True;False;True	197;1620;1887;1931;3782;4628	292;293;2509;2842;2892;2893;5866;5867;7120;7121	306;307;2710;3054;3105;3106;6390;6391;7742;7743	307;2710;3054;3105;6390;7742
A0A024QZP7;P06493;P06493-2;A0A087WZZ9;E5RIU6	A0A024QZP7;P06493;P06493-2;A0A087WZZ9;E5RIU6	14;14;12;10;7	14;14;12;10;7	14;14;12;10;7	Cyclin-dependent kinase 1	CDC2;CDK1	tr|A0A024QZP7|A0A024QZP7_HUMAN Cell division cycle 2, G1 to S and G2 to M, isoform CRA_a OS=Homo sapiens OX=9606 GN=CDK1 PE=1 SV=1;sp|P06493|CDK1_HUMAN Cyclin-dependent kinase 1 OS=Homo sapiens OX=9606 GN=CDK1 PE=1 SV=3;sp|P06493-2|CDK1_HUMAN Isoform 2 of	5	14	14	14	53.2	53.2	53.2	34081	297	297;297;240;224;189	0	142.18	1958100000	89005000	17				0	174;319;2537;2933;3118;3314;4007;4122;4337;4573;4615;5297;5795;6781	True;True;True;True;True;True;True;True;True;True;True;True;True;True	190;346;2705;3121;3315;3520;4242;4397;4656;4912;4954;5668;6195;6196;7246	284;519;520;4248;4868;4869;5180;5181;5451;6471;6676;7159;7510;7560;8610;9410;9411;10923	298;539;540;4632;5313;5314;5641;5642;5935;7024;7250;7783;8160;8210;9320;10203;10204;11801	298;539;4632;5314;5641;5935;7024;7250;7783;8160;8210;9320;10203;11801	0	32
F5H0M4;Q6P1A2;Q6P1A2-2;F5GYT3;B7Z3N5;F5H680;F5H7K7	F5H0M4;Q6P1A2;Q6P1A2-2	8;8;7;3;2;1;1	8;8;7;3;2;1;1	8;8;7;3;2;1;1	Lysophospholipid acyltransferase 5	LPCAT3	tr|F5H0M4|F5H0M4_HUMAN Lysophospholipid acyltransferase 5 OS=Homo sapiens OX=9606 GN=LPCAT3 PE=1 SV=1;sp|Q6P1A2|MBOA5_HUMAN Lysophospholipid acyltransferase 5 OS=Homo sapiens OX=9606 GN=LPCAT3 PE=1 SV=1;sp|Q6P1A2-2|MBOA5_HUMAN Isoform 2 of Lysophospholipid	7	8	8	8	32.3	32.3	32.3	39374	347	347;487;407;198;158;64;85	0	113.32	1316300000	87755000	10				284	499;1032;1955;2895;3460;3949;6484;6543	True;True;True;True;True;True;True;True	536;1103;2090;3081;3672;4178;6925;6987	820;821;1677;3096;4821;5675;6372;10505;10574;10575	856;857;1780;3313;5266;6178;6910;11368;11438;11439	857;1780;3313;5266;6178;6910;11368;11439
Q14728;D6RE79;D6RIZ4;D6RA47;D6R9N3;D6RHV1	Q14728;D6RE79;D6RIZ4;D6RA47	10;9;7;5;2;1	10;9;7;5;2;1	10;9;7;5;2;1	Major facilitator superfamily domain-containing protein 10	MFSD10	sp|Q14728|MFS10_HUMAN Major facilitator superfamily domain-containing protein 10 OS=Homo sapiens OX=9606 GN=MFSD10 PE=1 SV=1;tr|D6RE79|D6RE79_HUMAN Major facilitator superfamily domain-containing protein 10 OS=Homo sapiens OX=9606 GN=MFSD10 PE=1 SV=1;tr|D6	6	10	10	10	2020-09-25	2020-09-25	2020-09-25	48339	455	455;480;356;366;242;100	0	66057	1748500000	87426000	10				763	243;427;729;1916;1927;2250;2346;2732;3853;5206	True;True;True;True;True;True;True;True;True;True	264;464;785;2049;2060;2402;2505;2907;4079;5572	373;710;1179;3042;3057;3614;3924;4586;6245;8410	387;740;1238;3258;3273;3912;4274;5012;6780;9099	387;740;1238;3258;3273;3912;4274;5012;6780;9099
Q9H8H3;H0YI09;F8VQX6	Q9H8H3;H0YI09;F8VQX6	5;5;3	5;5;3	5;5;3	Methyltransferase-like protein 7A	METTL7A	sp|Q9H8H3|MET7A_HUMAN Methyltransferase-like protein 7A OS=Homo sapiens OX=9606 GN=METTL7A PE=1 SV=1;tr|H0YI09|H0YI09_HUMAN Methyltransferase-like protein 7A (Fragment) OS=Homo sapiens OX=9606 GN=METTL7A PE=1 SV=1;tr|F8VQX6|F8VQX6_HUMAN Methyltransferase-l	3	5	5	5	2020-02-24	2020-02-24	2020-02-24	28319	244	244;244;180	0	54792	1202700000	85910000	5				331	1404;2502;3755;3821;4550	True;True;True;True;True	1498;2669;3977;4045;4885	2344;4202;6109;6110;6191;7476	2540;4584;6635;6636;6718;8126	2540;4584;6635;6718;8126
P51148-2;P51148;K7ERI8;K7ERQ8;F8VUA5;K7ENY4;F8VVK3;F8VVZ0;F8VWU4;K7EN06;A0A1B0GWA9;A0A1B0GVC3;K7EIP6;F8VSF8;F8VPW9;F8WD79;F8WCY6;O95057;Q96HU8;F8VWZ7	P51148-2;P51148;K7ERI8;K7ERQ8	7;7;4;4;3;3;3;3;2;1;1;1;1;1;1;1;1;1;1;1	7;7;4;4;3;3;3;3;2;1;1;1;1;1;1;1;1;1;1;1	4;4;1;1;0;1;0;0;0;0;0;0;1;0;0;0;0;0;0;0	Ras-related protein Rab-5C	RAB5C	sp|P51148-2|RAB5C_HUMAN Isoform 2 of Ras-related protein Rab-5C OS=Homo sapiens OX=9606 GN=RAB5C;sp|P51148|RAB5C_HUMAN Ras-related protein Rab-5C OS=Homo sapiens OX=9606 GN=RAB5C PE=1 SV=2;tr|K7ERI8|K7ERI8_HUMAN Uncharacterized protein OS=Homo sapiens OX=9	20	7	7	4	2020-07-31	2020-07-31	2020-09-20	27035	249	249;216;161;282;115;150;124;100;91;136;43;112;27;74;73;65;62;198;199;79	0	71499	1621700000	85354000	15				661	1747;2353;4267;4696;5365;5487;6651	True;True;True;True;True;True;True	1869;2512;4583;5036;5738;5868;5869;7105;7106	2817;3932;3933;7017;7652;8695;8900;8901;8902;8903;10741;10742;10743	3029;4284;4285;7618;8304;9406;9627;9628;9629;9630;9631;11613;11614;11615;11616	3029;4284;7618;8304;9406;9630;11615	280;332;333	122;202;209
Q5QPK2;H0Y368;O60762;Q5QPJ9	Q5QPK2;H0Y368;O60762;Q5QPJ9	7;7;7;5	7;7;7;5	7;7;7;5	Dolichol-phosphate mannosyltransferase subunit 1	DPM1	tr|Q5QPK2|Q5QPK2_HUMAN Dolichol-phosphate mannosyltransferase subunit 1 OS=Homo sapiens OX=9606 GN=DPM1 PE=1 SV=1;tr|H0Y368|H0Y368_HUMAN Dolichol-phosphate mannosyltransferase subunit 1 (Fragment) OS=Homo sapiens OX=9606 GN=DPM1 PE=1 SV=1;sp|O60762|DPM1_HU	4	7	7	7	31	31	31	32426	287	287;295;260;221	0	52247	1702400000	85121000	8				315	1089;1491;2412;3387;3399;4830;6783	True;True;True;True;True;True;True	1164;1599;2575;3597;3609;5174;7248	1757;2488;4025;4026;5574;5591;7876;10925	1867;2688;4380;4381;6074;6092;8544;11803	1867;2688;4381;6074;6092;8544;11803
P60602-2;P60602	P60602-2;P60602	1;1	1;1	1;1	Reactive oxygen species modulator 1	ROMO1	sp|P60602-2|ROMO1_HUMAN Isoform 2 of Reactive oxygen species modulator 1 OS=Homo sapiens OX=9606 GN=ROMO1;sp|P60602|ROMO1_HUMAN Reactive oxygen species modulator 1 OS=Homo sapiens OX=9606 GN=ROMO1 PE=1 SV=1	2	1	1	1	2020-08-28	2020-08-28	2020-08-28	58998	59	59;79	0	16516	83550000	83550000	1				694	4641	True	4981	7593	8244	8244
CON__P02533;P02533;CON__P19012;CON__A2A4G1;P19012;CON__Q61782;K7ENV3	CON__P02533;P02533	21;21;5;5;5;3;1	18;18;3;2;3;3;1	4;4;0;0;0;1;0	Keratin, type I cytoskeletal 14	KRT14	;sp|P02533|K1C14_HUMAN Keratin, type I cytoskeletal 14 OS=Homo sapiens OX=9606 GN=KRT14 PE=1 SV=4	7	21	18	4	46	40.7	2020-06-13	51621	472	472;472;456;456;456;93;48	0	218.29	3070300000	82981000	23			+	189	311;430;489;639;739;1612;2820;2839;3150;3213;3529;4186;4187;4299;4752;5655;5760;6121;6213;6368;6607	True;True;True;True;True;True;True;True;False;False;True;True;True;True;True;True;True;True;True;False;True	337;467;526;688;795;1724;2999;3000;3019;3351;3414;3742;4487;4488;4617;4618;5094;6045;6156;6540;6635;6800;6801;7057	476;713;809;1040;1192;2641;4722;4723;4724;4753;4754;5230;5231;5310;5311;5807;5808;6863;6864;7096;7097;7098;7730;9219;9352;9875;10050;10317;10318;10683	494;743;845;1094;1252;2852;5162;5163;5164;5196;5197;5691;5692;5776;5777;6329;6330;7449;7450;7716;7717;7718;8383;10000;10133;10686;10884;11165;11166;11555	494;743;845;1094;1252;2852;5164;5196;5692;5777;6330;7449;7450;7718;8383;10000;10133;10686;10884;11165;11555	72;73;74;75;76	119;212;257;287;391
P01040;C9J0E4	P01040;C9J0E4	4;3	4;3	4;3	Cystatin-A;Cystatin-A, N-terminally processed	CSTA	sp|P01040|CYTA_HUMAN Cystatin-A OS=Homo sapiens OX=9606 GN=CSTA PE=1 SV=1;tr|C9J0E4|C9J0E4_HUMAN Cystatin-A OS=Homo sapiens OX=9606 GN=CSTA PE=1 SV=1	2	4	4	4	45.9	45.9	45.9	11006	98	98;63	0	29957	815940000	81594000	5				516	3283;4507;5238;6107	True;True;True;True	3487;4842;5604;6525	5391;7426;8470;9859;9860	5857;8071;9165;10670;10671	5857;8071;9165;10670
CON__P15497	CON__P15497	8	8	7				1	8	8	7	34.7	34.7	2020-07-28	30276	265	265	0	59606	1948300000	81178000	9			+	200	812;1304;1532;3521;3829;4761;6298;6507	True;True;True;True;True;True;True;True	869;1396;1640;3734;4053;5103;6727;6948	1301;2215;2216;2536;5745;6199;7741;10170;10528	1369;2407;2408;2737;6248;6726;8395;11006;11391	1369;2408;2737;6248;6726;8395;11006;11391
E9PKY0;O60716-7;O60716-2;O60716-4;O60716-6;O60716-3;O60716-5;O60716-32;O60716-8;O60716-24;O60716-10;O60716-12;O60716-14;O60716-11;O60716-13;O60716-9;O60716-17;O60716-15;O60716-18;O60716-31;O60716-29;O60716-27;O60716-30;O60716-28;O60716-26;C9JZR2;O60716-25;O60716-23;O60716-21;O60716-19;O60716-22;O60716-20;O60716-16;O60716	E9PKY0;O60716-7;O60716-2;O60716-4;O60716-6;O60716-3;O60716-5;O60716-32;O60716-8;O60716-24;O60716-10;O60716-12;O60716-14;O60716-11;O60716-13;O60716-9;O60716-17;O60716-15;O60716-18;O60716-31;O60716-29;O60716-27;O60716-30;O60716-28;O60716-26;C9JZR2;O60716-25;O60716-23;O60716-21;O60716-19;O60716-22;O60716-20;O60716-16;O60716	1;1;1;1;1;1;1;1;1;1;1;1;1;1;1;1;1;1;1;1;1;1;1;1;1;1;1;1;1;1;1;1;1;1	1;1;1;1;1;1;1;1;1;1;1;1;1;1;1;1;1;1;1;1;1;1;1;1;1;1;1;1;1;1;1;1;1;1	1;1;1;1;1;1;1;1;1;1;1;1;1;1;1;1;1;1;1;1;1;1;1;1;1;1;1;1;1;1;1;1;1;1	Catenin delta-1	CTNND1	tr|E9PKY0|E9PKY0_HUMAN Catenin delta-1 (Fragment) OS=Homo sapiens OX=9606 GN=CTNND1 PE=1 SV=1;sp|O60716-7|CTND1_HUMAN Isoform 1C of Catenin delta-1 OS=Homo sapiens OX=9606 GN=CTNND1;sp|O60716-2|CTND1_HUMAN Isoform 1AB of Catenin delta-1 OS=Homo sapiens OX=	34	1	1	1	2020-09-07	2020-09-07	2020-09-07	13995	126	126;918;962;947;941;939;933;589;912;811;908;893;887;885;879;914;867;864;861;595;610;616;618;624;639;938;645;817;832;838;840;846;858;968	0.00097087	64457	801970000	80197000	1				185	2304	True	2460	3769	4093	4093
P49327;A0A0U1RQF0;A0A0U1RRG3;J3KTF0	P49327;A0A0U1RQF0	75;74;4;1	75;74;4;1	75;74;4;1	Fatty acid synthase;[Acyl-carrier-protein] S-acetyltransferase;[Acyl-carrier-protein] S-malonyltransferase;3-oxoacyl-[acyl-carrier-protein] synthase;3-oxoacyl-[acyl-carrier-protein] reductase;3-hydroxyacyl-[acyl-carrier-protein] dehydratase;Enoyl-[acyl-carrier-protein] reductase;Oleoyl-[acyl-carrier-protein] hydrolase	FASN	sp|P49327|FAS_HUMAN Fatty acid synthase OS=Homo sapiens OX=9606 GN=FASN PE=1 SV=3;tr|A0A0U1RQF0|A0A0U1RQF0_HUMAN Fatty acid synthase OS=Homo sapiens OX=9606 GN=FASN PE=1 SV=1	4	75	75	75	42.3	42.3	42.3	273.42	2511	2511;2509;150;78	0	323.31	11922000000	79478000	85				652	26;66;93;108;170;275;318;459;691;714;721;847;857;950;988;1012;1081;1085;1164;1207;1303;1706;1711;1724;1907;2051;2168;2228;2230;2331;2355;2451;2558;3103;3328;3408;3437;3536;3657;3699;3702;3749;3761;3785;3818;3827;3884;3994;4014;4221;4575;4610;4623;4690;4731;4735;4924;4993;5120;5230;5287;6012;6019;6127;6139;6160;6218;6340;6346;6371;6377;6395;6433;6450;6522	True;True;True;True;True;True;True;True;True;True;True;True;True;True;True;True;True;True;True;True;True;True;True;True;True;True;True;True;True;True;True;True;True;True;True;True;True;True;True;True;True;True;True;True;True;True;True;True;True;True;True;True;True;True;True;True;True;True;True;True;True;True;True;True;True;True;True;True;True;True;True;True;True;True;True	27;72;100;117;185;299;345;496;743;768;776;905;915;1014;1058;1082;1155;1159;1245;1292;1395;1824;1829;1844;2040;2192;2313;2378;2381;2488;2514;2617;2728;3299;3534;3618;3649;3749;3876;3920;3923;3971;3983;4008;4042;4051;4112;4227;4253;4532;4914;4949;4962;5030;5071;5075;5271;5345;5483;5596;5657;5658;6424;6431;6546;6558;6579;6641;6771;6777;6804;6810;6828;6873;6890;6965	28;133;134;166;184;278;428;518;772;1109;1148;1158;1343;1353;1561;1625;1654;1744;1745;1749;1848;1905;2213;2214;2764;2769;2770;2786;3030;3245;3437;3582;3586;3904;3935;4079;4274;4275;5156;5470;5601;5642;5815;5982;6039;6042;6102;6116;6117;6146;6187;6197;6281;6456;6487;6932;7512;7554;7569;7646;7698;7703;8003;8115;8282;8440;8598;8599;8600;9724;9731;9882;9895;9954;9955;10057;10281;10282;10289;10322;1032…	28;138;139;171;189;292;446;538;808;1164;1205;1215;1411;1421;1658;1727;1757;1853;1854;1858;1959;2019;2405;2406;2975;2981;2982;2998;3246;3467;3697;3875;3879;4254;4287;4435;4659;4660;5616;5956;6102;6144;6337;6506;6564;6567;6628;6642;6643;6672;6714;6724;6816;7009;7040;7525;8162;8204;8219;8298;8350;8355;8682;8796;8964;9130;9308;9309;9310;10533;10540;10693;10706;10781;10782;10891;11128;11129;11137;1117…	28;139;171;189;292;446;538;808;1164;1205;1215;1411;1421;1658;1727;1757;1854;1858;1959;2019;2406;2975;2981;2998;3246;3467;3697;3875;3879;4254;4287;4435;4660;5616;5956;6102;6144;6337;6506;6564;6567;6628;6642;6672;6714;6724;6816;7009;7040;7525;8162;8204;8219;8298;8350;8355;8682;8796;8964;9130;9310;10533;10540;10693;10706;10781;10891;11129;11137;11170;11177;11199;11300;11322;11410	323;324	329;1873
Q9BY50;B4DI03;K7EJQ7;A0A0A0MR04	Q9BY50;B4DI03;K7EJQ7;A0A0A0MR04	5;4;4;3	5;4;4;3	5;4;4;3	Signal peptidase complex catalytic subunit SEC11C;Signal peptidase complex catalytic subunit SEC11	SEC11C;SEC11L3	sp|Q9BY50|SC11C_HUMAN Signal peptidase complex catalytic subunit SEC11C OS=Homo sapiens OX=9606 GN=SEC11C PE=1 SV=3;tr|B4DI03|B4DI03_HUMAN Signal peptidase complex catalytic subunit SEC11 OS=Homo sapiens OX=9606 GN=SEC11C PE=1 SV=1;tr|K7EJQ7|K7EJQ7_HUMAN S	4	5	5	5	44.8	44.8	44.8	21542	192	192;156;161;99	0	46433	1032500000	79426000	7				1024	203;895;2050;2105;2207	True;True;True;True;True	221;955;2191;2248;2355	321;322;1423;3243;3244;3344;3533	335;336;1499;3465;3466;3588;3813	336;1499;3466;3588;3813
O43707;O43707-2;O43707-3;F5GXS2;H7C144;P35609;P35609-2;G3V2N5;K7EJH8;Q08043;G3V2W4;A0A087WSZ2;G3V5M4;G3V2X9;H0YJ11;H0YJW3;K7EP19;G3V2E8;F6THM6;Q9H254-2;Q9H254-4;M0QZQ3;C9JY79;Q9H254	O43707;O43707-2;O43707-3;F5GXS2	40;29;20;20;15;6;6;6;6;5;5;4;3;3;3;3;2;2;2;1;1;1;1;1	40;29;20;20;15;6;6;6;6;5;5;4;3;3;3;3;2;2;2;1;1;1;1;1	28;23;16;16;12;0;0;0;5;0;0;0;0;0;0;0;1;0;0;1;1;1;1;1	Alpha-actinin-4	ACTN4	sp|O43707|ACTN4_HUMAN Alpha-actinin-4 OS=Homo sapiens OX=9606 GN=ACTN4 PE=1 SV=2;sp|O43707-2|ACTN4_HUMAN Isoform ACTN4ISO of Alpha-actinin-4 OS=Homo sapiens OX=9606 GN=ACTN4;sp|O43707-3|ACTN4_HUMAN Isoform 3 of Alpha-actinin-4 OS=Homo sapiens OX=9606 GN=AC	24	40	40	28	53.1	53.1	38.2	104.85	911	911;692;521;521;342;894;894;260;182;901;238;944;126;144;207;251;105;85;686;1309;2154;2002;2564;2564	0	323.31	5074500000	79289000	49				457	94;235;274;307;476;483;846;860;1128;1168;1315;1605;1684;2176;2547;2548;2571;2638;2856;3082;3206;3653;3815;3952;4048;4112;4218;4608;4743;4758;4956;5174;5390;5573;5636;5637;5639;5979;6041;6119	True;True;True;True;True;True;True;True;True;True;True;True;True;True;True;True;True;True;True;True;True;True;True;True;True;True;True;True;True;True;True;True;True;True;True;True;True;True;True;True	101;256;298;333;513;520;904;919;1206;1249;1407;1717;1802;2322;2717;2718;2741;2812;3040;3278;3407;3872;4039;4181;4298;4299;4382;4383;4527;4528;4947;5083;5100;5303;5540;5764;5961;6026;6027;6029;6388;6456;6537;6538	167;362;363;427;472;792;801;1342;1358;1805;1853;2228;2633;2732;3453;4263;4264;4293;4470;4471;4776;5129;5130;5303;5977;6184;6375;6539;6540;6648;6649;6926;6927;7552;7714;7737;8054;8364;8365;8737;8738;9110;9197;9198;9200;9678;9765;9872;9873	172;376;377;445;490;828;837;1410;1426;1915;1964;2421;2844;2943;3713;4648;4649;4679;4893;4894;5219;5586;5587;5588;5769;6501;6711;6913;7093;7094;7204;7205;7206;7519;7520;8202;8366;8390;8734;9052;9053;9455;9456;9885;9978;9979;9981;10485;10574;10683;10684	172;376;445;490;828;837;1410;1426;1915;1964;2421;2844;2943;3713;4648;4649;4679;4894;5219;5587;5769;6501;6711;6913;7093;7204;7520;8202;8366;8390;8734;9053;9456;9885;9978;9979;9981;10485;10574;10684	168;169;170;171	240;295;379;669
K7ERC8;Q06136;Q06136-2;K7EQS7	K7ERC8;Q06136;Q06136-2;K7EQS7	8;8;6;5	8;8;6;5	8;8;6;5	3-ketodihydrosphingosine reductase	KDSR	tr|K7ERC8|K7ERC8_HUMAN 3-ketodihydrosphingosine reductase OS=Homo sapiens OX=9606 GN=KDSR PE=1 SV=2;sp|Q06136|KDSR_HUMAN 3-ketodihydrosphingosine reductase OS=Homo sapiens OX=9606 GN=KDSR PE=1 SV=1;sp|Q06136-2|KDSR_HUMAN Isoform 2 of 3-ketodihydrosphingosi	4	8	8	8	32.6	32.6	32.6	32726	298	298;332;268;155	0	123.76	1743300000	79240000	13				398	1356;1735;2185;3062;3413;3489;4566;4755	True;True;True;True;True;True;True;True	1449;1856;2331;2332;3257;3623;3624;3701;4904;5097	2283;2804;3504;3505;5104;5606;5607;5608;5705;5706;7500;7501;7734	2477;3016;3784;3785;5561;6107;6108;6109;6208;6209;8150;8151;8387	2477;3016;3784;5561;6109;6209;8151;8387	133;134;135	117;124;202
P58511	P58511	2	2	2	Small integral membrane protein 11	SMIM11	sp|P58511|SI11A_HUMAN Small integral membrane protein 11A OS=Homo sapiens OX=9606 GN=SMIM11A PE=2 SV=1	1	2	2	2	46.6	46.6	46.6	68862	58	58	0	1975-12-01	234820000	78274000	3				691	5671;6132	True;True	6061;6551	9235;9887;9888	10016;10698;10699	10016;10698
Q14974;Q14974-2;J3KTM9;J3QKQ5;J3QR48;J3QRG4	Q14974;Q14974-2;J3KTM9	25;20;18;6;5;1	25;20;18;6;5;1	25;20;18;6;5;1	Importin subunit beta-1	KPNB1	sp|Q14974|IMB1_HUMAN Importin subunit beta-1 OS=Homo sapiens OX=9606 GN=KPNB1 PE=1 SV=2;sp|Q14974-2|IMB1_HUMAN Isoform 2 of Importin subunit beta-1 OS=Homo sapiens OX=9606 GN=KPNB1;tr|J3KTM9|J3KTM9_HUMAN Importin subunit beta-1 (Fragment) OS=Homo sapiens O	6	25	25	25	41.8	41.8	41.8	97169	876	876;731;690;248;148;60	0	273.33	3752900000	78186000	28				765	79;1015;1071;1553;2023;2056;2640;2911;3153;3540;3776;4058;4080;4525;4596;4603;4709;5074;5277;5344;5850;5878;6115;6293;6512	True;True;True;True;True;True;True;True;True;True;True;True;True;True;True;True;True;True;True;True;True;True;True;True;True	86;1085;1144;1662;2161;2197;2814;3098;3354;3753;3999;4313;4314;4341;4342;4860;4935;4942;5049;5431;5647;5716;6253;6283;6533;6721;6954	152;1657;1727;2562;3210;3255;4473;4839;4840;5234;5820;5821;5822;6136;6564;6565;6595;6596;7449;7539;7540;7547;7667;8216;8587;8670;9519;9552;9868;10161;10162;10535	157;1760;1833;2764;3432;3479;4896;5284;5285;5695;6342;6343;6344;6662;7118;7119;7150;7151;8099;8189;8190;8197;8319;8898;9297;9381;10323;10358;10679;10997;10998;11398	157;1760;1833;2764;3432;3479;4896;5285;5695;6343;6662;7119;7150;8099;8190;8197;8319;8898;9297;9381;10323;10358;10679;10997;11398	396;397	1;614
Q92643;B1AK81;A6NEM5;Q92643-2	Q92643;B1AK81;A6NEM5;Q92643-2	12;9;9;9	12;9;9;9	12;9;9;9	GPI-anchor transamidase	PIGK	sp|Q92643|GPI8_HUMAN GPI-anchor transamidase OS=Homo sapiens OX=9606 GN=PIGK PE=1 SV=2;tr|B1AK81|B1AK81_HUMAN GPI-anchor transamidase OS=Homo sapiens OX=9606 GN=PIGK PE=1 SV=1;tr|A6NEM5|A6NEM5_HUMAN GPI-anchor transamidase OS=Homo sapiens OX=9606 GN=PIGK P	4	12	12	12	39.7	39.7	39.7	45251	395	395;301;332;319	0	115.35	2013500000	77444000	16				935	1987;2003;3134;3395;3615;3649;3767;4473;4508;5190;5281;6555	True;True;True;True;True;True;True;True;True;True;True;True	2125;2141;3332;3605;3830;3867;3989;4805;4843;5556;5651;7000	3167;3185;5204;5205;5585;5586;5923;5924;5972;6125;7368;7427;8390;8591;8592;10607	3389;3407;5665;5666;6085;6086;6447;6448;6496;6651;8012;8072;9079;9301;9302;11474	3389;3407;5666;6086;6447;6496;6651;8012;8072;9079;9301;11474	466	340
Q9BT22;Q9BT22-2;K7EID2;K7EPU3;C9J202;K7EQK1;A0A087WZJ8;Q6GMV1	Q9BT22;Q9BT22-2;K7EID2	15;12;9;3;3;1;1;1	15;12;9;3;3;1;1;1	15;12;9;3;3;1;1;1	Chitobiosyldiphosphodolichol beta-mannosyltransferase	ALG1	sp|Q9BT22|ALG1_HUMAN Chitobiosyldiphosphodolichol beta-mannosyltransferase OS=Homo sapiens OX=9606 GN=ALG1 PE=1 SV=2;sp|Q9BT22-2|ALG1_HUMAN Isoform 2 of Chitobiosyldiphosphodolichol beta-mannosyltransferase OS=Homo sapiens OX=9606 GN=ALG1;tr|K7EID2|K7EID2_	8	15	15	15	39	39	39	52518	464	464;353;167;184;215;84;207;187	0	143.83	2089800000	77398000	20				1003	599;674;747;1212;1600;1754;2589;2913;3817;3919;4503;4548;5015;5102;6485	True;True;True;True;True;True;True;True;True;True;True;True;True;True;True	647;725;803;1297;1711;1877;2760;3100;4041;4148;4838;4883;5367;5464;6926	993;1088;1203;1910;1911;2626;2627;2826;2827;4320;4842;4843;6186;6335;7421;7473;7474;8141;8260;10506	1045;1142;1265;2024;2025;2837;2838;3038;3039;4706;5287;5288;6713;6873;8066;8123;8124;8822;8942;11369	1045;1142;1265;2024;2838;3039;4706;5287;6713;6873;8066;8124;8822;8942;11369
G5E972;P42167;H0YJH7;P42167-2;P42167-3;P42166	G5E972;P42167;H0YJH7;P42167-2	7;7;6;5;1;1	7;7;6;5;1;1	7;7;6;5;1;1	Lamina-associated polypeptide 2, isoforms beta/gamma;Thymopoietin;Thymopentin	TMPO	tr|G5E972|G5E972_HUMAN Lamina-associated polypeptide 2, isoforms beta/gamma OS=Homo sapiens OX=9606 GN=TMPO PE=1 SV=1;sp|P42167|LAP2B_HUMAN Lamina-associated polypeptide 2, isoforms beta/gamma OS=Homo sapiens OX=9606 GN=TMPO PE=1 SV=2;tr|H0YJH7|H0YJH7_HUMA	6	7	7	7	2020-06-24	2020-06-24	2020-06-24	46306	414	414;454;237;345;248;694	0	67161	1927000000	77082000	8				313	1465;2411;2654;4049;4569;5373;6801	True;True;True;True;True;True;True	1567;1568;2574;2828;4300;4301;4907;5747;7266	2454;2455;4024;4492;6541;6542;7504;8718;10951	2654;2655;4379;4916;7095;7096;8154;9436;11830	2654;4379;4916;7096;8154;9436;11830	112;113	308;342
Q8TBQ9	Q8TBQ9	1	1	1	Protein kish-A	TMEM167A	sp|Q8TBQ9|KISHA_HUMAN Protein kish-A OS=Homo sapiens OX=9606 GN=TMEM167A PE=1 SV=1	1	1	1	1	2020-05-12	2020-05-12	2020-05-12	80598	72	72	0.0018779	61675	307390000	76848000	1				907	5594	True	5982	9141	9917	9917
P50990;P50990-2;P50990-3;H7C2U0	P50990;P50990-2;P50990-3	24;23;19;4	24;23;19;4	12;11;11;4	T-complex protein 1 subunit theta	CCT8	sp|P50990|TCPQ_HUMAN T-complex protein 1 subunit theta OS=Homo sapiens OX=9606 GN=CCT8 PE=1 SV=4;sp|P50990-2|TCPQ_HUMAN Isoform 2 of T-complex protein 1 subunit theta OS=Homo sapiens OX=9606 GN=CCT8;sp|P50990-3|TCPQ_HUMAN Isoform 3 of T-complex protein 1 s	4	24	24	12	51.5	51.5	2020-04-25	59.62	548	548;529;475;107	0	194.27	3254200000	75678000	28				659	255;322;558;883;1206;1400;1582;2070;2316;2803;3218;3356;3885;3942;3978;4205;4495;4792;4941;5467;5507;5885;5947;6734	True;True;True;True;True;True;True;True;True;True;True;True;True;True;True;True;True;True;True;True;True;True;True;True	276;349;601;943;1291;1494;1692;2211;2472;2980;3420;3564;4113;4171;4209;4511;4830;5136;5288;5847;5848;5890;6291;6356;7197	401;523;903;1408;1904;2339;2340;2602;3273;3814;4700;4701;5318;5530;6282;6364;6411;6412;6895;7412;7811;8025;8870;8871;8938;9563;9639;10850	419;543;941;1484;2018;2535;2536;2812;3498;4144;5140;5141;5784;6029;6817;6902;6950;6951;7481;8057;8470;8704;9596;9597;9668;10369;10446;11725	419;543;941;1484;2018;2535;2812;3498;4144;5141;5784;6029;6817;6902;6951;7481;8057;8470;8704;9597;9668;10369;10446;11725	121;122	266;276
E7EVQ6;Q14534;H0YBN7;E5RJH9	E7EVQ6;Q14534	13;13;4;3	13;13;4;3	13;13;4;3	Squalene monooxygenase	SQLE	tr|E7EVQ6|E7EVQ6_HUMAN Squalene monooxygenase OS=Homo sapiens OX=9606 GN=SQLE PE=1 SV=1;sp|Q14534|ERG1_HUMAN Squalene monooxygenase OS=Homo sapiens OX=9606 GN=SQLE PE=1 SV=3	4	13	13	13	34.2	34.2	34.2	53067	479	479;574;163;184	0	103.33	2159800000	74475000	15				249	54;88;97;398;921;1414;1821;2368;2536;3032;6198;6341;6378	True;True;True;True;True;True;True;True;True;True;True;True;True	58;95;105;432;983;1509;1947;2529;2704;3224;6619;6772;6811	114;161;171;667;1459;2357;2358;2911;3952;4247;5012;5013;10030;10283;10330	119;166;176;697;1535;2553;2554;3124;4304;4631;5457;5458;10863;11130;11178	119;166;176;697;1535;2554;3124;4304;4631;5458;10863;11130;11178
Q5BKT4;Q5I7T1;F8VWA9;F5H5T2;F8VXJ0;F5GZZ6	Q5BKT4;Q5I7T1	12;11;2;2;2;2	12;11;2;2;2;2	12;11;2;2;2;2	Dol-P-Glc:Glc(2)Man(9)GlcNAc(2)-PP-Dol alpha-1,2-glucosyltransferase;Putative Dol-P-Glc:Glc(2)Man(9)GlcNAc(2)-PP-Dol alpha-1,2-glucosyltransferase	ALG10;ALG10B	sp|Q5BKT4|AG10A_HUMAN Dol-P-Glc:Glc(2)Man(9)GlcNAc(2)-PP-Dol alpha-1,2-glucosyltransferase OS=Homo sapiens OX=9606 GN=ALG10 PE=2 SV=1;sp|Q5I7T1|AG10B_HUMAN Putative Dol-P-Glc:Glc(2)Man(9)GlcNAc(2)-PP-Dol alpha-1,2-glucosyltransferase OS=Homo sapiens OX=960	6	12	12	12	2020-02-25	2020-02-25	2020-02-25	55605	473	473;473;77;77;126;126	0	86402	1915400000	73670000	11				797	354;1221;1518;2261;2605;2831;3677;4892;5566;5570;6623;6701	True;True;True;True;True;True;True;True;True;True;True;True	381;1307;1626;2414;2777;3011;3898;5237;5953;5957;7074;7160	565;1923;1924;2517;3632;4341;4744;6009;7957;9101;9106;10707;10809	585;2039;2040;2718;3930;4728;5187;6534;8634;9875;9880;11579;11683	585;2039;2718;3930;4728;5187;6534;8634;9875;9880;11579;11683
P17066;P48741	P17066;P48741	12;6	2;1	2;1	Heat shock 70 kDa protein 6;Putative heat shock 70 kDa protein 7	HSPA6;HSPA7	sp|P17066|HSP76_HUMAN Heat shock 70 kDa protein 6 OS=Homo sapiens OX=9606 GN=HSPA6 PE=1 SV=2;sp|P48741|HSP77_HUMAN Putative heat shock 70 kDa protein 7 OS=Homo sapiens OX=9606 GN=HSPA7 PE=5 SV=2	2	12	2	2	2020-08-20	2020-04-05	2020-04-05	71027	643	643;367	0	13.51	3300700000	73350000	1				572	465;514;977;1737;1750;2375;2766;2974;3597;5389;5805;5972	False;False;False;False;False;True;False;False;False;False;False;True	502;551;1045;1858;1872;2536;2941;3162;3810;5763;6207;6381	778;779;839;840;1611;2806;2820;3977;4641;4642;4643;4644;4929;5899;8736;9444;9667;9668	814;815;875;876;1713;3018;3032;4331;5079;5080;5081;5082;5374;6423;9454;10242;10474;10475	815;876;1713;3018;3032;4331;5080;5374;6423;9454;10242;10474
Q9BVK2-2;Q9BVK2;H0YDD3;H0YDQ1;E9PP80;E9PNE2;E9PK79;H0YEE0;E9PP96;E9PLP7;E9PP04;H0YD42;E9PKA5;H0YDV4;H0YCV0	Q9BVK2-2;Q9BVK2;H0YDD3	6;6;3;2;2;2;2;2;2;1;1;1;1;1;1	6;6;3;2;2;2;2;2;2;1;1;1;1;1;1	6;6;3;2;2;2;2;2;2;1;1;1;1;1;1	Probable dolichyl pyrophosphate Glc1Man9GlcNAc2 alpha-1,3-glucosyltransferase	ALG8	sp|Q9BVK2-2|ALG8_HUMAN Isoform 2 of Probable dolichyl pyrophosphate Glc1Man9GlcNAc2 alpha-1,3-glucosyltransferase OS=Homo sapiens OX=9606 GN=ALG8;sp|Q9BVK2|ALG8_HUMAN Probable dolichyl pyrophosphate Glc1Man9GlcNAc2 alpha-1,3-glucosyltransferase OS=Homo sap	15	6	6	6	2020-03-17	2020-03-17	2020-03-17	53.18	467	467;526;226;87;133;236;242;281;282;96;126;157;172;197;228	0	43667	1508600000	71837000	9				1019	271;677;1835;5452;6187;6614	True;True;True;True;True;True	293;294;728;1962;5831;6608;7065	421;422;423;1092;1093;2927;8826;9992;10697	439;440;441;1146;1147;3141;9548;10821;11569	440;1147;3141;9548;10821;11569	504	392
Q8NBM4;X6R5E5;Q8NBM4-3;Q8NBM4-2;Q8NBM4-4;Q8NBM4-5;Q5JUH4	Q8NBM4;X6R5E5;Q8NBM4-3;Q8NBM4-2;Q8NBM4-4	10;8;7;7;6;3;2	10;8;7;7;6;3;2	10;8;7;7;6;3;2	Ubiquitin-associated domain-containing protein 2	UBAC2	sp|Q8NBM4|UBAC2_HUMAN Ubiquitin-associated domain-containing protein 2 OS=Homo sapiens OX=9606 GN=UBAC2 PE=1 SV=1;tr|X6R5E5|X6R5E5_HUMAN Ubiquitin-associated domain-containing protein 2 (Fragment) OS=Homo sapiens OX=9606 GN=UBAC2 PE=1 SV=1;sp|Q8NBM4-3|UBAC	7	10	10	10	43.9	43.9	43.9	38963	344	344;204;231;309;157;141;135	0	95343	1506200000	71722000	12				891	495;1770;2712;3357;4081;4083;4827;4879;5228;6302	True;True;True;True;True;True;True;True;True;True	532;1894;2887;3565;4343;4345;4346;5171;5224;5594;6731	815;2849;4563;5531;5532;6597;6598;6600;6601;7873;7941;8437;10174	851;3061;4989;6030;6031;7152;7153;7155;7156;8541;8617;9126;11010	851;3061;4989;6030;7152;7156;8541;8617;9126;11010	457;458	1;235
Q9NW15;Q9NW15-2;Q9NW15-5;Q9NW15-3;Q9NW15-4;C9IYD3;C9JQC9;C9JPY2;C9J670;C9JA49;C9IZD0;C9JH90;H7C3N6;C9JJS5	Q9NW15;Q9NW15-2;Q9NW15-5;Q9NW15-3;Q9NW15-4	15;12;12;10;9;7;7;7;7;6;5;3;3;1	15;12;12;10;9;7;7;7;7;6;5;3;3;1	15;12;12;10;9;7;7;7;7;6;5;3;3;1	Anoctamin-10	ANO10	sp|Q9NW15|ANO10_HUMAN Anoctamin-10 OS=Homo sapiens OX=9606 GN=ANO10 PE=1 SV=2;sp|Q9NW15-2|ANO10_HUMAN Isoform 2 of Anoctamin-10 OS=Homo sapiens OX=9606 GN=ANO10;sp|Q9NW15-5|ANO10_HUMAN Isoform 5 of Anoctamin-10 OS=Homo sapiens OX=9606 GN=ANO10;sp|Q9NW15-3|	14	15	15	15	2020-09-27	2020-09-27	2020-09-27	76328	660	660;470;627;594;549;140;141;146;192;134;112;162;188;38	0	160.79	2336400000	70800000	16				1075	841;842;1263;1740;1819;2094;2423;3096;3296;3633;3955;4124;4535;6364;6603	True;True;True;True;True;True;True;True;True;True;True;True;True;True;True	899;900;1352;1862;1945;2237;2586;3292;3501;3849;4184;4399;4870;6795;7053	1335;1336;1337;1979;2810;2909;3332;4037;5147;5412;5946;6378;6678;7459;10310;10678	1403;1404;1405;2101;3022;3122;3576;4392;5606;5878;6470;6916;7252;8109;11158;11550	1403;1405;2101;3022;3122;3576;4392;5606;5878;6470;6916;7252;8109;11158;11550
Q8IZ81;D6RBS5;D6RHX2;V9GY58	Q8IZ81;D6RBS5	7;5;3;1	7;5;3;1	7;5;3;1	ELMO domain-containing protein 2	ELMOD2	sp|Q8IZ81|ELMD2_HUMAN ELMO domain-containing protein 2 OS=Homo sapiens OX=9606 GN=ELMOD2 PE=1 SV=1;tr|D6RBS5|D6RBS5_HUMAN ELMO domain-containing protein 2 (Fragment) OS=Homo sapiens OX=9606 GN=ELMOD2 PE=1 SV=8	4	7	7	7	31.4	31.4	31.4	34.96	293	293;167;96;59	0	61146	1456200000	69343000	8				870	526;2213;2679;3426;3973;4931;4994	True;True;True;True;True;True;True	564;2361;2854;3637;4204;5278;5346	853;854;3541;4526;5624;6405;8012;8116	889;890;3821;4952;6125;6944;8691;8797	890;3821;4952;6125;6944;8691;8797
P49321;P49321-3;P49321-4;P49321-2;E9PPR5;E9PRH9;Q5T624;E9PI86;H0YF33;E9PNB5;E9PPQ8;H0YDS9;E9PQG5;E9PAU3;E9PKR5	P49321;P49321-3;P49321-4;P49321-2	23;21;19;13;11;9;9;8;7;5;5;5;1;1;1	23;21;19;13;11;9;9;8;7;5;5;5;1;1;1	23;21;19;13;11;9;9;8;7;5;5;5;1;1;1	Nuclear autoantigenic sperm protein	NASP	sp|P49321|NASP_HUMAN Nuclear autoantigenic sperm protein OS=Homo sapiens OX=9606 GN=NASP PE=1 SV=2;sp|P49321-3|NASP_HUMAN Isoform 3 of Nuclear autoantigenic sperm protein OS=Homo sapiens OX=9606 GN=NASP;sp|P49321-4|NASP_HUMAN Isoform 4 of Nuclear autoantig	15	23	23	23	34.6	34.6	34.6	85237	788	788;790;724;449;316;268;422;256;288;143;154;175;37;38;56	0	190.75	3424800000	68496000	27				651	854;1154;1187;1423;1546;1643;2134;2513;2671;3509;3944;4019;4062;4539;5157;5185;5224;5437;5438;5541;5983;6428;6634	True;True;True;True;True;True;True;True;True;True;True;True;True;True;True;True;True;True;True;True;True;True;True	912;1235;1269;1518;1655;1759;2278;2680;2846;3722;4173;4259;4319;4874;5522;5551;5590;5815;5816;5924;5925;6392;6868;7085	1350;1836;1879;2368;2553;2681;3376;4218;4219;4516;5733;6367;6494;6570;7463;8338;8384;8433;8800;8801;8983;8984;9683;9684;10434;10719	1418;1947;1993;2564;2755;2892;3621;4602;4603;4942;6236;6905;7047;7124;8113;9022;9073;9122;9518;9519;9719;9720;10490;10491;10492;10493;11294;11591	1418;1947;1993;2564;2755;2892;3621;4603;4942;6236;6905;7047;7124;8113;9022;9073;9122;9518;9519;9719;10490;11294;11591	322	493
P35613-2;P35613;A0A087WUV8;A0A087X2B5;P35613-3;P35613-4;I3L192;R4GMX5;R4GN83;A0A2R8YDZ0	P35613-2;P35613;A0A087WUV8;A0A087X2B5;P35613-3;P35613-4;I3L192;R4GMX5	6;6;5;5;5;5;4;3;2;1	6;6;5;5;5;5;4;3;2;1	6;6;5;5;5;5;4;3;2;1	Basigin	BSG	sp|P35613-2|BASI_HUMAN Isoform 2 of Basigin OS=Homo sapiens OX=9606 GN=BSG;sp|P35613|BASI_HUMAN Basigin OS=Homo sapiens OX=9606 GN=BSG PE=1 SV=2;tr|A0A087WUV8|A0A087WUV8_HUMAN Basigin OS=Homo sapiens OX=9606 GN=BSG PE=1 SV=1;tr|A0A087X2B5|A0A087X2B5_HUMAN	10	6	6	6	2020-05-30	2020-05-30	2020-05-30	29221	269	269;385;189;221;176;205;160;84;52;132	0	111.05	944650000	67475000	10				628	1201;1771;3111;5093;5106;5347	True;True;True;True;True;True	1286;1895;3307;5452;5453;5468;5719;5720	1897;2850;5167;8240;8241;8242;8264;8673;8674;8675	2011;3062;5628;8922;8923;8924;8946;9384;9385;9386	2011;3062;5628;8924;8946;9386	310;311	123;176
Q96D05-2;Q96D05;Q5VVH9	Q96D05-2;Q96D05;Q5VVH9	2;2;1	2;2;1	2;2;1	Uncharacterized protein C10orf35	C10orf35	sp|Q96D05-2|F241B_HUMAN Isoform 2 of Uncharacterized protein FAM241B OS=Homo sapiens OX=9606 GN=FAM241B;sp|Q96D05|F241B_HUMAN Uncharacterized protein FAM241B OS=Homo sapiens OX=9606 GN=FAM241B PE=1 SV=1;tr|Q5VVH9|Q5VVH9_HUMAN Uncharacterized protein FAM241	3	2	2	2	2020-03-12	2020-03-12	2020-03-12	17512	163	163;121;103	0	16157	668010000	66801000	2				955	3360;5809	True;True	3568;6211	5535;9449	6034;10247	6034;10247
B5MDE0;Q96AA3;C9JP01;U3KQE9	B5MDE0;Q96AA3;C9JP01	9;9;6;1	9;9;6;1	9;9;6;1	Protein RFT1 homolog	RFT1	tr|B5MDE0|B5MDE0_HUMAN Protein RFT1 homolog OS=Homo sapiens OX=9606 GN=RFT1 PE=1 SV=1;sp|Q96AA3|RFT1_HUMAN Protein RFT1 homolog OS=Homo sapiens OX=9606 GN=RFT1 PE=1 SV=1;tr|C9JP01|C9JP01_HUMAN Protein RFT1 homolog (Fragment) OS=Homo sapiens OX=9606 GN=RFT1	4	9	9	9	2020-07-22	2020-07-22	2020-07-22	55835	502	502;541;291;123	0	75098	1590600000	66276000	13				149	1378;2312;2963;2982;3459;3464;3900;4725;6800	True;True;True;True;True;True;True;True;True	1472;2468;3151;3170;3671;3676;4129;5065;7265	2312;3808;3809;4914;4939;4940;5673;5674;5679;6311;7689;7690;10950	2506;4138;4139;5359;5384;5385;6176;6177;6182;6848;8341;8342;11829	2506;4138;5359;5384;6176;6182;6848;8341;11829
Q9C0D9;A0A087WW58;C9JAG1	Q9C0D9;A0A087WW58;C9JAG1	3;3;2	3;3;2	3;3;2	Ethanolaminephosphotransferase 1	EPT1	sp|Q9C0D9|EPT1_HUMAN Ethanolaminephosphotransferase 1 OS=Homo sapiens OX=9606 GN=SELENOI PE=1 SV=3;tr|A0A087WW58|A0A087WW58_HUMAN Ethanolaminephosphotransferase 1 OS=Homo sapiens OX=9606 GN=SELENOI PE=1 SV=1;tr|C9JAG1|C9JAG1_HUMAN Ethanolaminephosphotransf	3	3	3	3	2020-04-13	2020-04-13	2020-04-13	45228	397	397;396;180	0	44851	585950000	65105000	5				18	240;4839;6768	True;True;True	261;5183;7232;7233	368;7891;10904;10905;10906	382;8567;11781;11782;11783	382;8567;11783	9	33
Q9BUF5;K7ESM5;K7EL29;K7ESQ3;K7EQT3;K7EJ64;K7ERA8;K7EJZ4;K7EN98;K7EPE5	Q9BUF5;K7ESM5	18;15;6;4;4;4;4;4;4;4	12;9;6;4;4;4;4;4;4;4	6;3;4;4;4;4;4;4;4;4	Tubulin beta-6 chain	TUBB6	sp|Q9BUF5|TBB6_HUMAN Tubulin beta-6 chain OS=Homo sapiens OX=9606 GN=TUBB6 PE=1 SV=1;tr|K7ESM5|K7ESM5_HUMAN Tubulin beta chain (Fragment) OS=Homo sapiens OX=9606 GN=TUBB6 PE=1 SV=1	10	18	12	6	51.1	38.1	2020-03-25	49857	446	446;338;130;96;104;104;110;115;136;141	0	127.87	1497300000	65102000	13				1011	52;1379;1614;1902;1903;1983;2151;2152;2872;2930;3225;3431;3895;4016;4384;4448;5918;6714	True;True;True;False;False;True;True;True;True;True;False;False;True;True;False;False;True;True	56;1473;1726;2035;2036;2121;2296;2297;3057;3118;3428;3429;3642;3643;4123;4256;4708;4709;4710;4780;6324;7173	112;2313;2314;2643;3024;3025;3161;3416;3417;4795;4864;5326;5327;5328;5633;5634;5635;6304;6490;7221;7222;7223;7224;7336;7337;9606;10824	117;2507;2508;2854;3240;3241;3383;3675;3676;5239;5309;5792;5793;5794;6135;6136;6137;6840;7043;7845;7846;7847;7848;7978;7979;10413;11699	117;2508;2854;3240;3241;3383;3675;3676;5239;5309;5793;6137;6840;7043;7847;7978;10413;11699	20;21;22;212;503	73;257;267;299;300
Q969Z0;Q969Z0-2;C9J7P5;C9IZN7;H7C4R5;C9J5A2;C9J347	Q969Z0;Q969Z0-2;C9J7P5	16;11;8;7;5;1;1	16;11;8;7;5;1;1	16;11;8;7;5;1;1	Protein TBRG4	TBRG4	sp|Q969Z0|FAKD4_HUMAN FAST kinase domain-containing protein 4 OS=Homo sapiens OX=9606 GN=TBRG4 PE=1 SV=1;sp|Q969Z0-2|FAKD4_HUMAN Isoform 2 of FAST kinase domain-containing protein 4 OS=Homo sapiens OX=9606 GN=TBRG4;tr|C9J7P5|C9J7P5_HUMAN FAST kinase domain	7	16	16	16	39.3	39.3	39.3	70737	631	631;521;248;283;274;118;128	0	126.7	2733100000	65073000	21				948	281;441;670;1033;1106;1156;1438;2211;3215;3555;3558;3670;3816;6026;6203;6492	True;True;True;True;True;True;True;True;True;True;True;True;True;True;True;True	305;478;721;1104;1182;1237;1535;2359;3416;3768;3771;3891;4040;6438;6624;6933	434;435;725;1084;1678;1778;1838;1839;2392;3539;5313;5848;5851;6000;6001;6185;9740;9741;10036;10513	452;453;755;1138;1781;1888;1949;1950;2588;3819;5779;6372;6375;6524;6525;6526;6712;10549;10550;10869;11376	452;755;1138;1781;1888;1950;2588;3819;5779;6372;6375;6524;6712;10550;10869;11376
CON__P13647;P13647;H0YI76;H0YIN9	CON__P13647;P13647	22;22;10;9	11;11;6;6	3;3;3;2	Keratin, type II cytoskeletal 5	KRT5	;sp|P13647|K2C5_HUMAN Keratin, type II cytoskeletal 5 OS=Homo sapiens OX=9606 GN=KRT5 PE=1 SV=3	4	22	11	3	2020-04-26	2020-05-18	2020-01-05	62378	590	590;590;201;196	0	88672	2525200000	64750000	13			+	199	462;1673;1692;1693;2292;3182;3183;3530;3788;4331;4332;4341;4342;4385;5261;5534;5768;5783;5929;6589;6590;6592	True;True;False;False;False;False;False;False;True;False;False;False;True;True;True;True;True;True;True;False;False;True	499;1791;1810;1811;2448;3383;3384;3743;4011;4650;4651;4660;4661;4711;5627;5917;6165;6182;6183;6337;7039;7040;7042	775;2719;2742;2743;2744;3754;5271;5272;5273;5274;5809;6149;6150;7147;7148;7149;7150;7164;7165;7225;8566;8976;9369;9389;9390;9620;10660;10661;10662;10666	811;2930;2953;2954;2955;4077;5735;5736;5737;5738;6331;6675;6676;7770;7771;7772;7773;7788;7789;7849;9276;9712;10160;10180;10181;10427;11532;11533;11534;11538	811;2930;2953;2954;4077;5736;5738;6331;6675;7770;7772;7788;7789;7849;9276;9712;10160;10181;10427;11532;11533;11538	82;83	274;457
Q96CP7;K7ELX5;Q96CP7-2	Q96CP7	3;1;1	3;1;1	3;1;1	Calfacilitin	TLCD1	sp|Q96CP7|TLCD1_HUMAN Calfacilitin OS=Homo sapiens OX=9606 GN=TLCD1 PE=2 SV=1	3	3	3	3	2020-04-15	2020-04-15	2020-04-15	28548	247	247;147;200	0	25435	569300000	63255000	4				953	3200;3561;3716	True;True;True	3401;3774;3937	5296;5854;6059;6060	5762;6378;6585;6586	5762;6378;6585
Q6NUM9;Q6NUM9-2;H7C3J0;H7BZ81;H7BZ16;H0YGU3	Q6NUM9;Q6NUM9-2;H7C3J0;H7BZ81	15;12;11;9;4;3	15;12;11;9;4;3	15;12;11;9;4;3	All-trans-retinol 13,14-reductase	RETSAT	sp|Q6NUM9|RETST_HUMAN All-trans-retinol 13,14-reductase OS=Homo sapiens OX=9606 GN=RETSAT PE=1 SV=2;sp|Q6NUM9-2|RETST_HUMAN Isoform 2 of All-trans-retinol 13,14-reductase OS=Homo sapiens OX=9606 GN=RETSAT;tr|H7C3J0|H7C3J0_HUMAN All-trans-retinol 13,14-redu	6	15	15	15	37.2	37.2	37.2	66819	610	610;481;399;320;255;140	0	127.22	2245700000	62382000	17				817	91;208;457;546;1213;1227;1868;2124;2137;2142;3344;4047;4686;5984;6804	True;True;True;True;True;True;True;True;True;True;True;True;True;True;True	98;226;494;588;1298;1313;1995;2268;2281;2287;3552;4297;5026;6393;7269	164;328;329;768;887;1912;1930;1931;2967;3365;3379;3380;3387;3388;5517;6538;7642;9685;10954	169;342;343;804;925;2026;2046;2047;3181;3609;3624;3625;3632;3633;6016;7092;8294;10494;11834	169;343;804;925;2026;2047;3181;3609;3625;3632;6016;7092;8294;10494;11834
Q14739;C9JXK0;C9JES9	Q14739;C9JXK0	8;4;1	8;4;1	8;4;1	Lamin-B receptor	LBR	sp|Q14739|LBR_HUMAN Delta(14)-sterol reductase OS=Homo sapiens OX=9606 GN=LBR PE=1 SV=2;tr|C9JXK0|C9JXK0_HUMAN Lamin-B receptor (Fragment) OS=Homo sapiens OX=9606 GN=LBR PE=1 SV=1	3	8	8	8	2020-08-12	2020-08-12	2020-08-12	70702	615	615;213;51	0	76102	2174500000	62129000	10				764	1681;2720;4252;4594;5026;6392;6642;6731	True;True;True;True;True;True;True;True	1799;2895;4568;4933;5378;6825;7094;7193	2729;4571;6973;7537;8156;8157;10345;10729;10844;10845	2940;4997;7566;8187;8837;8838;11195;11601;11719;11720	2940;4997;7566;8187;8838;11195;11601;11720
Q13445;K7EIN4;K7EQ63	Q13445;K7EIN4;K7EQ63	5;3;3	5;3;3	5;3;3	Transmembrane emp24 domain-containing protein 1	TMED1	sp|Q13445|TMED1_HUMAN Transmembrane emp24 domain-containing protein 1 OS=Homo sapiens OX=9606 GN=TMED1 PE=1 SV=1;tr|K7EIN4|K7EIN4_HUMAN Transmembrane emp24 domain-containing protein 1 OS=Homo sapiens OX=9606 GN=TMED1 PE=1 SV=1;tr|K7EQ63|K7EQ63_HUMAN Transm	3	5	5	5	2020-08-23	2020-08-23	2020-08-23	25206	227	227;82;191	0	73027	558710000	62079000	4				754	115;1566;3229;4371;5170	True;True;True;True;True	125;1676;3433;4693;5536	206;2585;5332;7203;8357	216;2795;5798;7827;9045	216;2795;5798;7827;9045	390	161
Q9H0V9;Q9H0V9-2;F8WB07;Q9H0V9-3;F8WEK5	Q9H0V9;Q9H0V9-2	8;8;3;3;2	8;8;3;3;2	8;8;3;3;2	VIP36-like protein	LMAN2L	sp|Q9H0V9|LMA2L_HUMAN VIP36-like protein OS=Homo sapiens OX=9606 GN=LMAN2L PE=1 SV=1;sp|Q9H0V9-2|LMA2L_HUMAN Isoform 2 of VIP36-like protein OS=Homo sapiens OX=9606 GN=LMAN2L	5	8	8	8	33	33	33	39.71	348	348;359;169;214;107	0	95.28	1417500000	61629000	9				1030	773;1121;1966;2403;3881;4167;4353;4671	True;True;True;True;True;True;True;True	830;1198;2104;2566;4108;4465;4466;4673;5011	1240;1797;3140;4012;4013;6277;6839;6840;7182;7624	1304;1907;3362;4367;4368;6812;7425;7426;7806;8275	1304;1907;3362;4368;6812;7425;7806;8275	510	139
F5H6U7;Q9Y3E0;G3V1U5;F5GWD8;F5GXH6	F5H6U7;Q9Y3E0;G3V1U5	3;3;2;1;1	3;3;2;1;1	3;3;2;1;1	Vesicle transport protein GOT1B	GOLT1B	tr|F5H6U7|F5H6U7_HUMAN Vesicle transport protein GOT1B OS=Homo sapiens OX=9606 GN=GOLT1B PE=1 SV=1;sp|Q9Y3E0|GOT1B_HUMAN Vesicle transport protein GOT1B OS=Homo sapiens OX=9606 GN=GOLT1B PE=1 SV=1;tr|G3V1U5|G3V1U5_HUMAN Golgi transport 1 homolog B (S. cere	5	3	3	3	2020-06-26	2020-06-26	2020-06-26	14307	128	128;138;74;40;42	0	30387	368680000	61446000	3				290	2101;4105;6280	True;True;True	2244;4372;6708	3340;6636;10147	3584;7192;10983	3584;7192;10983
Q5BJH2	Q5BJH2	1	1	1	Transmembrane protein 128	TMEM128	sp|Q5BJH2|TM128_HUMAN Transmembrane protein 128 OS=Homo sapiens OX=9606 GN=TMEM128 PE=1 SV=2	1	1	1	1	2020-09-07	2020-09-07	2020-09-07	18822	165	165	0.0010799	84877	245030000	61259000	1				796	1852	True	1979	2947	3161	3161
Q9BV10;H7C4I6;H7C5R7;REV__I3L072;REV__Q9BSJ5-2;REV__Q9BSJ5-3;REV__Q9BSJ5	Q9BV10	9;4;4;1;1;1;1	9;4;4;1;1;1;1	9;4;4;1;1;1;1	Dol-P-Man:Man(7)GlcNAc(2)-PP-Dol alpha-1,6-mannosyltransferase	ALG12	sp|Q9BV10|ALG12_HUMAN Dol-P-Man:Man(7)GlcNAc(2)-PP-Dol alpha-1,6-mannosyltransferase OS=Homo sapiens OX=9606 GN=ALG12 PE=1 SV=1	7	9	9	9	2020-09-28	2020-09-28	2020-09-28	54654	488	488;196;205;547;573;583;609	0	100.14	1514700000	60590000	12				1013	1226;1818;2040;2197;3929;4961;5604;5964;6206	True;True;True;True;True;True;True;True;True	1312;1944;2180;2344;4158;5308;5993;6373;6627	1929;2908;3230;3519;3520;6347;8061;9153;9658;9659;10039	2045;3121;3452;3799;3800;6885;8741;9930;10465;10466;10872;10873	2045;3121;3452;3799;6885;8741;9930;10466;10873
Q96ES6;REV__Q96B02-3;REV__X6REH9;B4DXG7;A0A3B3ITT1;P52798-2;P52798;P52798-3;Q6PI78	Q96ES6	8;1;1;1;1;1;1;1;1	8;1;1;1;1;1;1;1;1	8;1;1;1;1;1;1;1;1	Major facilitator superfamily domain-containing protein 3	MFSD3	sp|Q96ES6|MFSD3_HUMAN Major facilitator superfamily domain-containing protein 3 OS=Homo sapiens OX=9606 GN=MFSD3 PE=2 SV=1	9	8	8	8	2020-02-26	2020-02-26	2020-02-26	42695	412	412;180;191;233;340;193;201;207;240	0	48933	842110000	60151000	8				960	212;351;709;1103;3226;3590;3591;6207	True;True;True;True;True;True;True;True	230;378;762;1179;3430;3803;3804;6628	333;560;1142;1775;5329;5891;5892;10040	347;580;1199;1885;5795;6415;6416;10874	347;580;1199;1885;5795;6415;6416;10874
Q5SZE1;H0YNU7;Q96G23;H0YLQ6;Q5SZE2;Q5SZE3;H0YKH6;Q5SZE4	Q5SZE1;H0YNU7;Q96G23;H0YLQ6	3;3;3;2;1;1;1;1	3;3;3;2;1;1;1;1	3;3;3;2;1;1;1;1	Ceramide synthase 2	CERS2	tr|Q5SZE1|Q5SZE1_HUMAN Ceramide synthase 2 (Fragment) OS=Homo sapiens OX=9606 GN=CERS2 PE=1 SV=2;tr|H0YNU7|H0YNU7_HUMAN Ceramide synthase 2 OS=Homo sapiens OX=9606 GN=CERS2 PE=1 SV=2;sp|Q96G23|CERS2_HUMAN Ceramide synthase 2 OS=Homo sapiens OX=9606 GN=CERS	8	3	3	3	2020-05-14	2020-05-14	2020-05-14	36373	304	304;377;380;228;128;192;222;249	0	37002	955590000	59724000	5				338	234;421;4079	True;True;True	254;255;457;4340	360;361;699;700;6594	374;375;729;730;7149	375;730;7149	115	236
Q8N118;Q8N118-3;Q8N118-2	Q8N118;Q8N118-3;Q8N118-2	15;13;13	15;13;13	15;13;13	Cytochrome P450 4X1	CYP4X1	sp|Q8N118|CP4X1_HUMAN Cytochrome P450 4X1 OS=Homo sapiens OX=9606 GN=CYP4X1 PE=2 SV=1;sp|Q8N118-3|CP4X1_HUMAN Isoform 3 of Cytochrome P450 4X1 OS=Homo sapiens OX=9606 GN=CYP4X1;sp|Q8N118-2|CP4X1_HUMAN Isoform 2 of Cytochrome P450 4X1 OS=Homo sapiens OX=960	3	15	15	15	2020-08-30	2020-08-30	2020-08-30	58875	509	509;444;508	0	115.58	2089600000	59703000	18				871	264;619;1597;1826;1943;2183;3481;3631;3832;3993;4051;4244;4289;6166;6752	True;True;True;True;True;True;True;True;True;True;True;True;True;True;True	286;668;1708;1952;1953;2078;2329;3693;3847;4056;4226;4304;4559;4606;6586;7215	413;1018;2622;2623;2916;2917;3081;3502;5697;5943;5944;6202;6455;6551;6962;7083;9963;10882	431;1071;2833;2834;3129;3130;3298;3782;6200;6467;6468;6729;7008;7105;7555;7702;10790;11759	431;1071;2834;3130;3298;3782;6200;6468;6729;7008;7105;7555;7702;10790;11759	440	66
Q92520;C9JP35;C9JMN4	Q92520;C9JP35;C9JMN4	9;5;5	9;5;5	9;5;5	Protein FAM3C	FAM3C	sp|Q92520|FAM3C_HUMAN Protein FAM3C OS=Homo sapiens OX=9606 GN=FAM3C PE=1 SV=1;tr|C9JP35|C9JP35_HUMAN Protein FAM3C (Fragment) OS=Homo sapiens OX=9606 GN=FAM3C PE=1 SV=1;tr|C9JMN4|C9JMN4_HUMAN Protein FAM3C (Fragment) OS=Homo sapiens OX=9606 GN=FAM3C PE=1	3	9	9	9	46.7	46.7	46.7	24.68	227	227;109;151	0	69286	1131000000	59525000	9				929	987;3446;4015;4023;5021;5298;5590;6597;6613	True;True;True;True;True;True;True;True;True	1057;3658;4254;4255;4265;5373;5669;5978;7047;7064	1624;5654;6488;6489;6504;8150;8611;9137;10671;10696	1726;6156;7041;7042;7057;8831;9321;9913;11543;11568	1726;6156;7042;7057;8831;9321;9913;11543;11568	464	73
A0A0A0MRX2;Q96HY6-2;Q96HY6	A0A0A0MRX2;Q96HY6-2;Q96HY6	5;5;5	5;5;5	5;5;5	DDRGK domain-containing protein 1	DDRGK1	tr|A0A0A0MRX2|A0A0A0MRX2_HUMAN DDRGK domain-containing protein 1 OS=Homo sapiens OX=9606 GN=DDRGK1 PE=1 SV=1;sp|Q96HY6-2|DDRGK_HUMAN Isoform 2 of DDRGK domain-containing protein 1 OS=Homo sapiens OX=9606 GN=DDRGK1;sp|Q96HY6|DDRGK_HUMAN DDRGK domain-contain	3	5	5	5	2020-08-21	2020-08-21	2020-08-21	33939	298	298;313;314	0	75718	1229800000	58564000	6				45	69;1159;4494;5912;6403	True;True;True;True;True	75;1240;4829;6318;6836	137;138;1842;7411;9596;10357;10358	142;143;1953;8056;10402;11207;11208	143;1953;8056;10402;11208
O95573;F5GWH2;F5H062;C9JC11	O95573	22;4;2;1	22;4;2;1	22;4;2;1	Long-chain-fatty-acid--CoA ligase 3	ACSL3	sp|O95573|ACSL3_HUMAN Long-chain-fatty-acid--CoA ligase 3 OS=Homo sapiens OX=9606 GN=ACSL3 PE=1 SV=3	4	22	22	22	41.2	41.2	41.2	80419	720	720;141;95;88	0	226.02	2483200000	57749000	22				506	110;181;903;1635;2167;2347;2472;2721;2884;3567;4148;4347;4456;4483;4484;5431;5614;5716;6017;6182;6314;6513	True;True;True;True;True;True;True;True;True;True;True;True;True;True;True;True;True;True;True;True;True;True	119;198;964;1750;2312;2506;2638;2896;3070;3780;4439;4667;4788;4818;4819;5809;6003;6110;6429;6603;6745;6955	186;294;1434;2672;3435;3436;3925;4110;4572;4809;5863;6811;7175;7347;7396;7397;8791;9172;9298;9729;9987;10232;10536	191;308;1510;2883;3695;3696;4275;4467;4998;5253;6387;7396;7799;7989;8041;8042;9509;9953;10079;10538;10816;11072;11399	191;308;1510;2883;3695;4275;4467;4998;5253;6387;7396;7799;7989;8041;8042;9509;9953;10079;10538;10816;11072;11399
Q9NUQ7;D6RGX2;H0YA18;D6RB53;H0Y9B0;D6RA67;D6R9J7	Q9NUQ7;D6RGX2;H0YA18	16;15;11;4;4;3;2	16;15;11;4;4;3;2	16;15;11;4;4;3;2	Ufm1-specific protease 2	UFSP2	sp|Q9NUQ7|UFSP2_HUMAN Ufm1-specific protease 2 OS=Homo sapiens OX=9606 GN=UFSP2 PE=1 SV=3;tr|D6RGX2|D6RGX2_HUMAN Ufm1-specific protease 2 OS=Homo sapiens OX=9606 GN=UFSP2 PE=1 SV=1;tr|H0YA18|H0YA18_HUMAN Ufm1-specific protease 2 (Fragment) OS=Homo sapiens	7	16	16	16	54.2	54.2	54.2	53261	469	469;387;368;112;197;124;87	0	140.76	1499900000	57688000	18				1071	1372;1415;1561;1827;1849;2341;2342;2642;2648;3635;3840;4206;4382;4415;5242;5273	True;True;True;True;True;True;True;True;True;True;True;True;True;True;True;True	1465;1510;1670;1954;1976;2500;2501;2816;2822;3851;4065;4512;4705;4743;5608;5642	2304;2359;2572;2918;2944;3917;3918;3919;4475;4483;5948;5949;6213;6896;7218;7261;8475;8581;8582	2498;2555;2774;3131;3158;4267;4268;4269;4899;4907;6472;6473;6740;7482;7842;7888;9170;9291;9292	2498;2555;2774;3131;3158;4267;4269;4899;4907;6473;6740;7482;7842;7888;9170;9292
P07237;H7BZ94;H0Y3Z3;I3L398;I3L312;I3L4M2;I3NI03;I3L0S0;I3L3U6;I3L3P5;I3L1Y5;I3L514	P07237;H7BZ94;H0Y3Z3;I3L398	18;17;11;9;7;5;5;4;3;2;1;1	18;17;11;9;7;5;5;4;3;2;1;1	18;17;11;9;7;5;5;4;3;2;1;1	Protein disulfide-isomerase	P4HB	sp|P07237|PDIA1_HUMAN Protein disulfide-isomerase OS=Homo sapiens OX=9606 GN=P4HB PE=1 SV=3;tr|H7BZ94|H7BZ94_HUMAN Protein disulfide-isomerase OS=Homo sapiens OX=9606 GN=P4HB PE=1 SV=2;tr|H0Y3Z3|H0Y3Z3_HUMAN Protein disulfide-isomerase (Fragment) OS=Homo s	12	18	18	18	42.7	42.7	42.7	57116	508	508;464;274;200;208;117;166;148;188;156;54;106	0	213.86	2516800000	57201000	24				538	862;1489;2526;2789;2966;3496;4038;4273;4393;4748;4796;5279;5436;5596;5826;5930;6057;6673	True;True;True;True;True;True;True;True;True;True;True;True;True;True;True;True;True;True	921;1597;2694;2966;3154;3708;4284;4285;4589;4721;5090;5140;5649;5814;5984;6229;6338;6472;7132	1360;2486;4235;4236;4684;4918;4919;5715;6524;6525;7023;7237;7723;7724;7815;8589;8799;9143;9144;9488;9621;9787;9788;10778;10779	1428;2686;4619;4620;5124;5363;5364;6218;7078;7079;7624;7863;8376;8377;8474;9299;9517;9919;9920;10290;10428;10596;10597;11652;11653	1428;2686;4620;5124;5364;6218;7078;7624;7863;8377;8474;9299;9517;9920;10290;10428;10596;11653	210	425
P32119;A6NIW5	P32119	9;4	8;4	8;4	Peroxiredoxin-2	PRDX2	sp|P32119|PRDX2_HUMAN Peroxiredoxin-2 OS=Homo sapiens OX=9606 GN=PRDX2 PE=1 SV=5	2	9	8	8	44.4	38.9	38.9	21892	198	198;136	0	63306	968120000	56948000	8				622	1305;3060;3801;3947;4541;4793;4986;5415;5521	True;True;True;True;True;False;True;True;True	1397;3255;4024;4176;4876;5137;5337;5792;5904	2217;5102;6167;6370;7466;7812;8103;8771;8953	2409;5559;6693;6908;8116;8471;8784;9489;9683	2409;5559;6693;6908;8116;8471;8784;9489;9683
P40227;P40227-2;Q92526-3;Q92526;Q92526-2	P40227;P40227-2	11;9;3;3;2	11;9;3;3;2	11;9;3;3;2	T-complex protein 1 subunit zeta	CCT6A	sp|P40227|TCPZ_HUMAN T-complex protein 1 subunit zeta OS=Homo sapiens OX=9606 GN=CCT6A PE=1 SV=3;sp|P40227-2|TCPZ_HUMAN Isoform 2 of T-complex protein 1 subunit zeta OS=Homo sapiens OX=9606 GN=CCT6A	5	11	11	11	2020-04-25	2020-04-25	2020-04-25	58024	531	531;486;493;530;485	0	105.68	2048900000	56913000	14				635	850;1462;2217;2225;2569;2773;4134;4679;5107;6043;6116	True;True;True;True;True;True;True;True;True;True;True	908;1559;1560;2367;2375;2739;2948;4412;5019;5469;6458;6534	1346;2426;2427;3548;3578;3579;4291;4651;6694;7634;8265;9767;9768;9769;9869	1414;2624;2625;3828;3871;3872;4676;5089;7269;8285;8947;10576;10577;10578;10680	1414;2625;3828;3872;4676;5089;7269;8285;8947;10577;10680	316;317	46;143
Q15057;A0A087X1H5;A0A0U1RQT1;H7C3K3;H7C3Q8;C9J8L1;Q96P50-4;Q15027;Q96P50-1;Q96P50	Q15057;A0A087X1H5;A0A0U1RQT1	27;25;18;6;6;1;1;1;1;1	27;25;18;6;6;1;1;1;1;1	27;25;18;6;6;1;1;1;1;1	Arf-GAP with coiled-coil, ANK repeat and PH domain-containing protein 2	ACAP2	sp|Q15057|ACAP2_HUMAN Arf-GAP with coiled-coil, ANK repeat and PH domain-containing protein 2 OS=Homo sapiens OX=9606 GN=ACAP2 PE=1 SV=3;tr|A0A087X1H5|A0A087X1H5_HUMAN Arf-GAP with coiled-coil, ANK repeat and PH domain-containing protein 2 OS=Homo sapiens	10	27	27	27	46.3	46.3	46.3	88028	778	778;777;547;228;256;51;564;740;759;834	0	317.18	3435500000	56320000	28				769	169;453;535;589;829;830;980;1002;1556;1928;2027;2081;2264;2413;2500;3643;4001;4772;5043;5213;5251;5276;5367;6284;6453;6499;6774	True;True;True;True;True;True;True;True;True;True;True;True;True;True;True;True;True;True;True;True;True;True;True;True;True;True;True	184;490;576;636;886;887;888;1048;1072;1665;2061;2166;2222;2417;2576;2667;3859;4235;5115;5395;5396;5579;5617;5646;5740;6712;6893;6940;7239	277;764;868;981;1318;1319;1320;1614;1643;2566;3058;3215;3285;3635;4027;4200;5961;6464;7754;8174;8175;8417;8554;8586;8697;10152;10465;10520;10914	291;800;905;1033;1386;1387;1388;1716;1746;2768;3274;3437;3510;3933;4382;4582;6485;7017;8408;8855;8856;9106;9264;9296;9408;10988;11325;11383;11792	291;800;905;1033;1387;1388;1716;1746;2768;3274;3437;3510;3933;4382;4582;6485;7017;8408;8855;9106;9264;9296;9408;10988;11325;11383;11792	405;406	340;760
G3V5P8;G3V3B2;G3V4K0;O95406	G3V5P8;G3V3B2;G3V4K0;O95406	2;2;2;2	2;2;2;2	2;2;2;2	Protein cornichon homolog 1	CNIH1	tr|G3V5P8|G3V5P8_HUMAN Protein cornichon homolog 1 OS=Homo sapiens OX=9606 GN=CNIH1 PE=1 SV=1;tr|G3V3B2|G3V3B2_HUMAN Protein cornichon homolog 1 OS=Homo sapiens OX=9606 GN=CNIH1 PE=1 SV=1;tr|G3V4K0|G3V4K0_HUMAN Cornichon homolog (Drosophila), isoform CRA_c	4	2	2	2	24	24	24	14051	121	121;136;160;144	0	64428	168950000	56317000	2				310	4652;6723	True;True	4992;7185	7605;10836	8256;11711	8256;11711
Q8NFQ8	Q8NFQ8	16	15	15	Torsin-1A-interacting protein 2	TOR1AIP2	sp|Q8NFQ8|TOIP2_HUMAN Torsin-1A-interacting protein 2 OS=Homo sapiens OX=9606 GN=TOR1AIP2 PE=1 SV=1	1	16	15	15	47.7	45.5	45.5	51263	470	470	0	224.92	1506100000	55782000	19				904	83;106;131;685;870;1090;1480;1510;1959;2146;3515;3814;4403;5104;6327;6565	True;True;True;True;True;True;True;True;True;True;True;True;True;True;True;False	90;115;143;736;930;1165;1588;1618;2095;2096;2291;3728;4038;4731;5466;6758;7010	156;182;233;1101;1102;1370;1758;2477;2507;3125;3126;3409;3410;5739;6183;7247;7248;8262;10247;10619	161;187;247;1155;1156;1439;1868;2677;2708;3346;3347;3668;3669;6242;6710;7874;7875;8944;11087;11487	161;187;247;1156;1439;1868;2677;2708;3347;3668;6242;6710;7875;8944;11087;11487	460	438
P60468;S4R3B5	P60468	3;1	3;1	3;1	Protein transport protein Sec61 subunit beta	SEC61B	sp|P60468|SC61B_HUMAN Protein transport protein Sec61 subunit beta OS=Homo sapiens OX=9606 GN=SEC61B PE=1 SV=2	2	3	3	3	37.5	37.5	37.5	99743	96	96;42	0	19813	387990000	55427000	3				693	2004;4538;5807	True;True;True	2142;4873;6209	3186;7462;9446	3408;8112;10244	3408;8112;10244
P53985;Q5T8R5;P53985-2;Q5T8R3;Q5T8R4	P53985;Q5T8R5;P53985-2	6;4;3;2;1	6;4;3;2;1	6;4;3;2;1	Monocarboxylate transporter 1	SLC16A1	sp|P53985|MOT1_HUMAN Monocarboxylate transporter 1 OS=Homo sapiens OX=9606 GN=SLC16A1 PE=1 SV=3;tr|Q5T8R5|Q5T8R5_HUMAN Monocarboxylate transporter 1 (Fragment) OS=Homo sapiens OX=9606 GN=SLC16A1 PE=1 SV=1;sp|P53985-2|MOT1_HUMAN Isoform 2 of Monocarboxylate	5	6	6	6	2020-04-14	2020-04-14	2020-04-14	53944	500	500;456;430;296;215	0	102.08	1032600000	54347000	9				676	923;1240;1241;3667;4557;5012	True;True;True;True;True;True	985;1327;1328;3887;3888;4893;5364	1461;1462;1946;1947;1948;5996;5997;7486;8137	1537;1538;2062;2063;2064;6520;6521;8136;8818	1537;2062;2064;6521;8136;8818	344	415
E9PP55;Q96K19-5;Q96K19-3;Q96K19-2;Q96K19;E9PNG8	E9PP55;Q96K19-5;Q96K19-3;Q96K19-2;Q96K19;E9PNG8	2;2;2;2;2;1	2;2;2;2;2;1	2;2;2;2;2;1	E3 ubiquitin-protein ligase RNF170	RNF170	tr|E9PP55|E9PP55_HUMAN E3 ubiquitin-protein ligase RNF170 (Fragment) OS=Homo sapiens OX=9606 GN=RNF170 PE=1 SV=1;sp|Q96K19-5|RN170_HUMAN Isoform 5 of E3 ubiquitin-protein ligase RNF170 OS=Homo sapiens OX=9606 GN=RNF170;sp|Q96K19-3|RN170_HUMAN Isoform 3 of	6	2	2	2	20	20	20	12976	115	115;116;200;236;258;45	0	23218	162660000	54221000	2				273	1533;6756	True;True	1641;7220	2537;10889	2738;11766	2738;11766
P40616-2;P40616;B4DZG7;F8VYN9;F8VP99;F8W1Z8;F8VP63	P40616-2;P40616;B4DZG7;F8VYN9	4;4;3;3;1;1;1	4;4;3;3;1;1;1	4;4;3;3;1;1;1	ADP-ribosylation factor-like protein 1	ARL1	sp|P40616-2|ARL1_HUMAN Isoform 2 of ADP-ribosylation factor-like protein 1 OS=Homo sapiens OX=9606 GN=ARL1;sp|P40616|ARL1_HUMAN ADP-ribosylation factor-like protein 1 OS=Homo sapiens OX=9606 GN=ARL1 PE=1 SV=1;tr|B4DZG7|B4DZG7_HUMAN cDNA FLJ50309, highly si	7	4	4	4	2020-05-30	2020-05-30	2020-05-30	18565	164	164;181;135;194;17;52;64	0	55114	649750000	54146000	6				636	273;2330;2809;5095	True;True;True;True	297;2487;2986;5455	426;3902;3903;4708;8244;8245	444;4252;4253;5148;8926;8927	444;4252;5148;8926
Q5TGE2;A5PLL7-2;A5PLL7;I3L0A0;Q13404-1	Q5TGE2;A5PLL7-2;A5PLL7;I3L0A0	5;5;5;4;2	5;5;5;4;2	5;5;5;4;2	Transmembrane protein 189	TMEM189;TMEM189-UBE2V1	tr|Q5TGE2|Q5TGE2_HUMAN HCG2044780, isoform CRA_b OS=Homo sapiens OX=9606 GN=TMEM189 PE=1 SV=1;sp|A5PLL7-2|TM189_HUMAN Isoform 2 of Transmembrane protein 189 OS=Homo sapiens OX=9606 GN=TMEM189;sp|A5PLL7|TM189_HUMAN Transmembrane protein 189 OS=Homo sapiens	5	5	5	5	36.9	36.9	36.9	22883	195	195;267;270;370;221	0	34951	428970000	53622000	6				120	1337;2416;4982;6533;6550	True;True;True;True;True	1430;2579;5332;6977;6995	2257;2258;4030;8096;10560;10602	2451;2452;4385;8777;11423;11469	2452;4385;8777;11423;11469
O14980;C9JKM9;C9J673;C9IZS4;C9JQ02;C9JV99;F8WF71;C9IYM2;H7BZC5;C9JF49	O14980	30;9;7;6;6;6;5;4;4;3	30;9;7;6;6;6;5;4;4;3	30;9;7;6;6;6;5;4;4;3	Exportin-1	XPO1	sp|O14980|XPO1_HUMAN Exportin-1 OS=Homo sapiens OX=9606 GN=XPO1 PE=1 SV=1	10	30	30	30	40.6	40.6	40.6	123.38	1071	1071;179;132;94;95;100;82;62;72;59	0	280.34	3473900000	53444000	36				437	268;569;780;813;1332;1344;1506;1864;1865;2598;2643;2960;3254;3355;3385;3493;3583;3617;3684;4012;4368;4498;4847;4849;5014;5275;5779;5951;6721;6810	True;True;True;True;True;True;True;True;True;True;True;True;True;True;True;True;True;True;True;True;True;True;True;True;True;True;True;True;True;True	290;613;837;870;1425;1437;1614;1991;1992;2770;2817;3148;3458;3563;3595;3705;3796;3832;3905;4250;4251;4689;4833;5191;5193;5366;5645;6177;6360;7182;7183;7277	417;954;955;1249;1302;2250;2268;2503;2961;2962;4333;4476;4908;4909;5361;5529;5571;5572;5712;5884;5927;5928;6017;6483;6484;6485;7199;7415;7899;7901;8139;8140;8585;9383;9644;10833;10834;10984	435;1006;1007;1313;1370;2444;2462;2704;3175;3176;4719;4900;5353;5354;5827;6028;6071;6072;6215;6408;6451;6452;6542;7036;7037;7038;7823;8060;8575;8577;8820;8821;9295;10174;10451;11708;11709;11865	435;1006;1313;1370;2444;2462;2704;3175;3176;4719;4900;5354;5827;6028;6071;6215;6408;6451;6542;7037;7823;8060;8575;8577;8821;9295;10174;10451;11709;11865	150;151;152;153	45;73;658;771
Q9H490-2;Q9H490	Q9H490-2;Q9H490	4;4	4;4	4;4	Phosphatidylinositol glycan anchor biosynthesis class U protein	PIGU	sp|Q9H490-2|PIGU_HUMAN Isoform 2 of Phosphatidylinositol glycan anchor biosynthesis class U protein OS=Homo sapiens OX=9606 GN=PIGU;sp|Q9H490|PIGU_HUMAN Phosphatidylinositol glycan anchor biosynthesis class U protein OS=Homo sapiens OX=9606 GN=PIGU PE=1 SV	2	4	4	4	2020-03-13	2020-03-13	2020-03-13	47.61	415	415;435	0	64623	747810000	53415000	5				1039	855;3568;5357;5898	True;True;True;True	913;3781;5730;6304	1351;5864;5865;8687;9579	1419;6388;6389;9398;10385	1419;6388;9398;10385
Q86YN1;Q86YN1-2	Q86YN1;Q86YN1-2	3;2	3;2	3;2	Dolichyldiphosphatase 1	DOLPP1	sp|Q86YN1|DOPP1_HUMAN Dolichyldiphosphatase 1 OS=Homo sapiens OX=9606 GN=DOLPP1 PE=2 SV=1;sp|Q86YN1-2|DOPP1_HUMAN Isoform 2 of Dolichyldiphosphatase 1 OS=Homo sapiens OX=9606 GN=DOLPP1	2	3	3	3	2020-04-13	2020-04-13	2020-04-13	2020-03-27	238	238;195	0	20311	532980000	53298000	3				861	2611;4472;4511	True;True;True	2783;4804;4846	4351;7367;7430	4738;8011;8075	4738;8011;8075
H0YFD6;P40939;A0A2R8Y4F5;A0A2R8YG21;A0A2R8Y688	H0YFD6;P40939;A0A2R8Y4F5	25;25;22;12;7	25;25;22;12;7	25;25;22;12;7	Trifunctional enzyme subunit alpha, mitochondrial;Long-chain enoyl-CoA hydratase;Long chain 3-hydroxyacyl-CoA dehydrogenase	HADHA	tr|H0YFD6|H0YFD6_HUMAN Trifunctional enzyme subunit alpha, mitochondrial OS=Homo sapiens OX=9606 GN=HADHA PE=1 SV=2;sp|P40939|ECHA_HUMAN Trifunctional enzyme subunit alpha, mitochondrial OS=Homo sapiens OX=9606 GN=HADHA PE=1 SV=2;tr|A0A2R8Y4F5|A0A2R8Y4F5_H	5	25	25	25	44.1	44.1	44.1	86371	792	792;763;728;499;357	0	250.52	2937500000	52455000	27				330	127;343;666;763;939;1618;1782;1963;2287;2574;2829;3092;3141;3856;4092;4164;4203;4751;5030;5109;5592;5626;5686;5834;6079	True;True;True;True;True;True;True;True;True;True;True;True;True;True;True;True;True;True;True;True;True;True;True;True;True	139;370;717;820;1003;1731;1907;2101;2443;2744;3009;3288;3342;4082;4355;4459;4460;4508;5093;5382;5471;5980;6016;6078;6237;6495	227;228;548;1079;1226;1511;2648;2863;3136;3746;4299;4742;5143;5219;6248;6618;6833;6834;6885;7729;8161;8267;9139;9187;9255;9500;9501;9821	241;242;568;1133;1288;1589;2859;3075;3358;4068;4685;5185;5602;5680;6783;7174;7419;7420;7471;8382;8842;8949;9915;9968;10036;10303;10304;10632	241;568;1133;1288;1589;2859;3075;3358;4068;4685;5185;5602;5680;6783;7174;7420;7471;8382;8842;8949;9915;9968;10036;10304;10632	114	506
P17987;E7ERF2;E7EQR6;F5H282;F5H136;F5H676;F5GZ03;F5H726;F5GZI8;F5GYL4;F5H7Y1	P17987;E7ERF2;E7EQR6;F5H282	18;12;11;10;6;5;5;4;4;2;1	18;12;11;10;6;5;5;4;4;2;1	18;12;11;10;6;5;5;4;4;2;1	T-complex protein 1 subunit alpha	TCP1	sp|P17987|TCPA_HUMAN T-complex protein 1 subunit alpha OS=Homo sapiens OX=9606 GN=TCP1 PE=1 SV=1;tr|E7ERF2|E7ERF2_HUMAN T-complex protein 1 subunit alpha OS=Homo sapiens OX=9606 GN=TCP1 PE=1 SV=1;tr|E7EQR6|E7EQR6_HUMAN T-complex protein 1 subunit alpha OS=	11	18	18	18	46.6	46.6	46.6	60343	556	556;433;401;332;136;111;221;91;100;65;59	0	175.66	2031700000	52094000	23				576	480;1531;1628;1698;2026;2454;2612;2637;2733;3541;4053;4689;5229;5358;5445;6120;6666;6749	True;True;True;True;True;True;True;True;True;True;True;True;True;True;True;True;True;True	517;1639;1742;1816;2164;2165;2620;2784;2811;2908;3754;4306;5029;5595;5731;5823;6539;7125;7212	797;798;2535;2661;2662;2755;3213;3214;4084;4085;4352;4469;4587;5823;5824;6553;7645;8438;8439;8688;8810;9874;10769;10879	833;834;2736;2872;2873;2966;3435;3436;4440;4441;4739;4892;5013;6345;6346;7107;8297;9127;9128;9129;9399;9528;10685;11643;11756	833;2736;2872;2966;3436;4440;4739;4892;5013;6345;7107;8297;9127;9399;9528;10685;11643;11756	275	384
Q8NBI6;A0A140T9D0;Q8NBI6-2;H7C2F4;Q8NBI6-3	Q8NBI6	11;5;5;4;3	11;5;5;4;3	11;5;5;4;3	Xyloside xylosyltransferase 1	XXYLT1	sp|Q8NBI6|XXLT1_HUMAN Xyloside xylosyltransferase 1 OS=Homo sapiens OX=9606 GN=XXYLT1 PE=1 SV=1	5	11	11	11	39.2	39.2	39.2	43806	393	393;247;190;114;187	0	99027	1457300000	52045000	11				890	144;201;1401;1424;1473;1731;2148;3029;3336;5202;6075	True;True;True;True;True;True;True;True;True;True;True	157;219;1495;1519;1580;1851;2293;3221;3542;5568;6491	248;249;319;2341;2369;2469;2795;3413;5008;5500;8405;9813;9814	262;263;333;2537;2565;2669;3007;3672;5453;5996;9094;10622;10623	262;333;2537;2565;2669;3007;3672;5453;5996;9094;10622
P55084-2;P55084;F5GZQ3;B5MD38;C9JEY0;C9JE81;C9K0M0	P55084-2;P55084;F5GZQ3;B5MD38	11;11;9;8;4;4;2	11;11;9;8;4;4;2	11;11;9;8;4;4;2	Trifunctional enzyme subunit beta, mitochondrial;3-ketoacyl-CoA thiolase	HADHB	sp|P55084-2|ECHB_HUMAN Isoform 2 of Trifunctional enzyme subunit beta, mitochondrial OS=Homo sapiens OX=9606 GN=HADHB;sp|P55084|ECHB_HUMAN Trifunctional enzyme subunit beta, mitochondrial OS=Homo sapiens OX=9606 GN=HADHB PE=1 SV=3;tr|F5GZQ3|F5GZQ3_HUMAN Tr	7	11	11	11	2020-07-27	2020-07-27	2020-07-27	48879	452	452;474;459;351;149;175;84	0	87502	1589400000	51271000	12				684	51;385;1027;1142;1890;3307;3651;3935;4482;5732;6031	True;True;True;True;True;True;True;True;True;True;True	55;416;1098;1222;2023;3513;3869;4164;4817;6126;6444	110;111;647;1672;1822;3002;5444;5974;6353;7395;9316;9749	115;116;677;1775;1932;3216;5928;6498;6891;8040;10097;10558	115;677;1775;1932;3216;5928;6498;6891;8040;10097;10558
F8W914;Q9NQC3-2;Q9NQC3-5;Q9NQC3;H7C106;Q9NQC3-3;Q9NQC3-4;Q9NQC3-6;A0A0U1RQR6	F8W914;Q9NQC3-2;Q9NQC3-5;Q9NQC3;H7C106;Q9NQC3-3;Q9NQC3-4;Q9NQC3-6;A0A0U1RQR6	5;5;5;5;4;4;4;4;3	5;5;5;5;4;4;4;4;3	5;5;5;5;4;4;4;4;3	Reticulon;Reticulon-4	RTN4	tr|F8W914|F8W914_HUMAN Reticulon OS=Homo sapiens OX=9606 GN=RTN4 PE=1 SV=1;sp|Q9NQC3-2|RTN4_HUMAN Isoform B of Reticulon-4 OS=Homo sapiens OX=9606 GN=RTN4;sp|Q9NQC3-5|RTN4_HUMAN Isoform B2 of Reticulon-4 OS=Homo sapiens OX=9606 GN=RTN4;sp|Q9NQC3|RTN4_HUMAN	9	5	5	5	2020-05-16	2020-05-16	2020-05-16	37144	345	345;373;392;1192;203;199;960;986;127	0	43799	655110000	50393000	6				302	2267;2366;2541;5054;6776	True;True;True;True;True	2420;2527;2709;5407;7241	3638;3950;4252;8187;10916;10917	3936;4302;4637;8868;11794;11795	3936;4302;4637;8868;11794
K7EPA3;Q9NX61;U3KQT6;Q9NX61-2;K7EQ34;K7EQE7;K7EJK6;K7EKY7;V9GYP8	K7EPA3;Q9NX61;U3KQT6;Q9NX61-2;K7EQ34;K7EQE7	8;8;7;7;6;5;2;2;1	8;8;7;7;6;5;2;2;1	8;8;7;7;6;5;2;2;1	Transmembrane protein 161A	TMEM161A	tr|K7EPA3|K7EPA3_HUMAN Transmembrane protein 161A OS=Homo sapiens OX=9606 GN=TMEM161A PE=1 SV=2;sp|Q9NX61|T161A_HUMAN Transmembrane protein 161A OS=Homo sapiens OX=9606 GN=TMEM161A PE=1 SV=1;tr|U3KQT6|U3KQT6_HUMAN Transmembrane protein 161A OS=Homo sapiens	9	8	8	8	2020-09-26	2020-09-26	2020-09-26	50552	454	454;479;325;376;315;145;40;194;61	0	56059	1355200000	50194000	8				393	572;2538;3198;4077;5667;6029;6480;6518	True;True;True;True;True;True;True;True	617;2706;3399;4338;6057;6442;6921;6961	961;4249;5292;5293;6592;9231;9747;10501;10542	1013;4633;5757;5758;7147;10012;10556;11364;11405	1013;4633;5758;7147;10012;10556;11364;11405
Q5SWX8;Q5SWX8-3;Q5SWX8-4;Q5SWX8-2	Q5SWX8;Q5SWX8-3;Q5SWX8-4;Q5SWX8-2	14;13;13;11	14;13;13;11	14;13;13;11	Protein odr-4 homolog	ODR4	sp|Q5SWX8|ODR4_HUMAN Protein odr-4 homolog OS=Homo sapiens OX=9606 GN=ODR4 PE=1 SV=1;sp|Q5SWX8-3|ODR4_HUMAN Isoform 3 of Protein odr-4 homolog OS=Homo sapiens OX=9606 GN=ODR4;sp|Q5SWX8-4|ODR4_HUMAN Isoform 4 of Protein odr-4 homolog OS=Homo sapiens OX=9606	4	14	14	14	38.1	38.1	38.1	51103	454	454;335;422;431	0	146.84	1296100000	49851000	16				806	195;795;890;1266;1284;1357;2248;3259;3972;5379;5861;5867;6193;6362	True;True;True;True;True;True;True;True;True;True;True;True;True;True	212;852;950;1355;1376;1450;2400;3463;4203;5753;6265;6271;6614;6793	309;1277;1417;1982;2069;2070;2284;3611;3612;5366;6404;8725;9532;9538;10000;10001;10308	323;1343;1493;2104;2207;2208;2478;3909;3910;5832;6943;9443;10336;10342;10829;10830;11156	323;1343;1493;2104;2207;2478;3910;5832;6943;9443;10336;10342;10830;11156
Q16718;A0A087X1G1;H7BYD0;Q16718-2;F8WAS3;C9IZN5;A0A087WXR5	Q16718;A0A087X1G1;H7BYD0;Q16718-2;F8WAS3;C9IZN5	6;5;5;5;4;3;2	6;5;5;5;4;3;2	6;5;5;5;4;3;2	NADH dehydrogenase [ubiquinone] 1 alpha subcomplex subunit 5	NDUFA5	sp|Q16718|NDUA5_HUMAN NADH dehydrogenase [ubiquinone] 1 alpha subcomplex subunit 5 OS=Homo sapiens OX=9606 GN=NDUFA5 PE=1 SV=3;tr|A0A087X1G1|A0A087X1G1_HUMAN NADH dehydrogenase [ubiquinone] 1 alpha subcomplex subunit 5 OS=Homo sapiens OX=9606 GN=NDUFA5 PE=	7	6	6	6	66.4	66.4	66.4	13459	116	116;101;112;116;70;93;77	0	50907	497250000	49725000	6				783	2786;3095;3147;3969;5794;6790	True;True;True;True;True;True	2963;3291;3348;4200;6194;7255	4681;5146;5225;6401;9409;10932	5121;5605;5686;6940;10202;11810	5121;5605;5686;6940;10202;11810
A2A2G4;Q9Y672;S4R350;A0A3B3ITI5;A0A3B3IS62;A0A3B3ITD6	A2A2G4;Q9Y672;S4R350	7;7;5;3;2;2	7;7;5;3;2;2	7;7;5;3;2;2	Dolichyl pyrophosphate Man9GlcNAc2 alpha-1,3-glucosyltransferase	ALG6	tr|A2A2G4|A2A2G4_HUMAN Alpha-1,3-glucosyltransferase OS=Homo sapiens OX=9606 GN=ALG6 PE=1 SV=1;sp|Q9Y672|ALG6_HUMAN Dolichyl pyrophosphate Man9GlcNAc2 alpha-1,3-glucosyltransferase OS=Homo sapiens OX=9606 GN=ALG6 PE=1 SV=2;tr|S4R350|S4R350_HUMAN Alpha-1,3-	6	7	7	7	2020-07-15	2020-07-15	2020-07-15	58347	509	509;507;301;230;173;194	0	52584	1188400000	49518000	7				117	1543;1823;2599;3474;4846;5761;5906	True;True;True;True;True;True;True	1652;1949;2771;3686;5190;6157;6312	2550;2913;4334;5689;7898;9353;9589	2752;3126;4720;6192;8574;10134;10395	2752;3126;4720;6192;8574;10134;10395
U3KQU4;O14569	U3KQU4;O14569	1;1	1;1	1;1	Cytochrome b561 domain-containing protein 2	CYB561D2	tr|U3KQU4|U3KQU4_HUMAN Uncharacterized protein OS=Homo sapiens OX=9606 PE=4 SV=1;sp|O14569|C56D2_HUMAN Cytochrome b561 domain-containing protein 2 OS=Homo sapiens OX=9606 GN=CYB561D2 PE=1 SV=1	2	1	1	1	24	24	24	5212	50	50;222	0	17779	147030000	49010000	2				425	355	True	382;383	566;567	586;587	587
Q15836;K7ENK9;K7EKX0;J3QRU4;F8WCA0;L7N2F9;P63027	Q15836;K7ENK9;K7EKX0;J3QRU4;F8WCA0;L7N2F9;P63027	3;2;2;2;2;2;2	3;2;2;2;2;2;2	3;2;2;2;2;2;2	Vesicle-associated membrane protein 3;Vesicle-associated membrane protein 2	VAMP3;VAMP2	sp|Q15836|VAMP3_HUMAN Vesicle-associated membrane protein 3 OS=Homo sapiens OX=9606 GN=VAMP3 PE=1 SV=3;tr|K7ENK9|K7ENK9_HUMAN Vesicle-associated membrane protein 2 OS=Homo sapiens OX=9606 GN=VAMP2 PE=4 SV=1;tr|K7EKX0|K7EKX0_HUMAN Vesicle-associated membran	7	3	3	3	40	40	40	11309	100	100;68;72;113;118;121;116	0	74951	293970000	48995000	3				779	107;3775;3804	True;True;True	116;3998;4027	183;6135;6170	188;6661;6697	188;6661;6697
Q9Y3Q3;G3V1J9;F5H4M7;Q9Y3Q3-2	Q9Y3Q3	4;1;1;1	4;1;1;1	4;1;1;1	Transmembrane emp24 domain-containing protein 3	TMED3	sp|Q9Y3Q3|TMED3_HUMAN Transmembrane emp24 domain-containing protein 3 OS=Homo sapiens OX=9606 GN=TMED3 PE=1 SV=1	4	4	4	4	2020-01-22	2020-01-22	2020-01-22	24777	217	217;146;155;173	0	49911	680990000	48642000	6				1135	137;4703;5825;6347	True;True;True;True	150;5043;6228;6778	241;7660;7661;9486;9487;10290	255;8312;8313;10288;10289;11138	255;8313;10288;11138
Q7L5N1;E7EM64;H7C3T0	Q7L5N1;E7EM64	7;7;2	7;7;2	7;7;2	COP9 signalosome complex subunit 6	COPS6	sp|Q7L5N1|CSN6_HUMAN COP9 signalosome complex subunit 6 OS=Homo sapiens OX=9606 GN=COPS6 PE=1 SV=1;tr|E7EM64|E7EM64_HUMAN COP9 signalosome complex subunit 6 OS=Homo sapiens OX=9606 GN=COPS6 PE=1 SV=1	3	7	7	7	33.9	33.9	33.9	36163	327	327;326;123	0	76567	921900000	48521000	9				239	471;1396;1897;4192;4312;4903;5511	True;True;True;True;True;True;True	508;1490;2030;4494;4631;5248;5894	785;786;2333;3017;6870;6871;7124;7972;8942	821;822;2527;3233;7456;7457;7746;8649;9672	822;2527;3233;7456;7746;8649;9672
O00400;A0A2R8Y5I5;A0A2R8YEX5;A0A2R8Y359;H7C532;A0A2R8Y6H1;A0A2R8YF57;H7C577;H7C562	O00400;A0A2R8Y5I5	9;6;4;4;4;4;4;2;2	9;6;4;4;4;4;4;2;2	9;6;4;4;4;4;4;2;2	Acetyl-coenzyme A transporter 1	SLC33A1	sp|O00400|ACATN_HUMAN Acetyl-coenzyme A transporter 1 OS=Homo sapiens OX=9606 GN=SLC33A1 PE=1 SV=1;tr|A0A2R8Y5I5|A0A2R8Y5I5_HUMAN Acetyl-coenzyme A transporter 1 OS=Homo sapiens OX=9606 GN=SLC33A1 PE=1 SV=1	9	9	9	9	2020-07-19	2020-07-19	2020-07-19	60908	549	549;336;265;267;335;351;447;185;269	0	62412	1156700000	48196000	8				417	425;1178;1272;1341;2704;3544;3642;4182;6788	True;True;True;True;True;True;True;True;True	462;1260;1363;1434;2879;3757;3858;4483;7253	708;1869;2051;2264;4554;5827;5960;6859;10930	738;1981;2189;2458;4980;6349;6484;7445;11808	738;1981;2189;2458;4980;6349;6484;7445;11808	142	1
A0A140TA09;Q99942	A0A140TA09;Q99942	2;2	2;2	2;2	E3 ubiquitin-protein ligase RNF5	RNF5	tr|A0A140TA09|A0A140TA09_HUMAN E3 ubiquitin-protein ligase RNF5 OS=Homo sapiens OX=9606 GN=RNF5 PE=1 SV=1;sp|Q99942|RNF5_HUMAN E3 ubiquitin-protein ligase RNF5 OS=Homo sapiens OX=9606 GN=RNF5 PE=1 SV=1	2	2	2	2	2020-02-24	2020-02-24	2020-02-24	10013	91	91;180	0	22548	335150000	47879000	2				77	6;4724	True;True	6;5064	6;7688	6;8340	6;8340
Q8N8J7	Q8N8J7	5	5	5	Uncharacterized protein C4orf32	C4orf32	sp|Q8N8J7|F241A_HUMAN Uncharacterized protein FAM241A OS=Homo sapiens OX=9606 GN=FAM241A PE=2 SV=2	1	5	5	5	49.2	49.2	49.2	14652	132	132	0	37859	379860000	47482000	6				886	1557;2122;4097;4224;4356	True;True;True;True;True	1666;2266;4362;4535;4676	2567;2568;3363;6626;6935;7185	2769;2770;3607;7182;7528;7809	2770;3607;7182;7528;7809
P62805	P62805	4	4	4	Histone H4	HIST1H4A	sp|P62805|H4_HUMAN Histone H4 OS=Homo sapiens OX=9606 GN=HIST1H4A PE=1 SV=2	1	4	4	4	40.8	40.8	40.8	11367	103	103	0	25978	282330000	47055000	4				709	769;971;5851;6004	True;True;True;True	826;1038;6254;6416	1236;1604;9520;9713	1300;1706;10324;10522	1300;1706;10324;10522
Q9BVG9;A0A0J9YWQ2;E9PS47;E9PLE4	Q9BVG9;A0A0J9YWQ2	7;5;1;1	7;5;1;1	7;5;1;1	Phosphatidylserine synthase 2	PTDSS2	sp|Q9BVG9|PTSS2_HUMAN Phosphatidylserine synthase 2 OS=Homo sapiens OX=9606 GN=PTDSS2 PE=1 SV=1;tr|A0A0J9YWQ2|A0A0J9YWQ2_HUMAN Phosphatidylserine synthase 2 (Fragment) OS=Homo sapiens OX=9606 GN=PTDSS2 PE=1 SV=1	4	7	7	7	2020-01-18	2020-01-18	2020-01-18	56252	487	487;393;60;81	0	95.63	1049400000	45627000	8				1018	487;851;2618;3249;3425;5381;5664	True;True;True;True;True;True;True	524;909;2792;3453;3636;5755;6054	807;1347;4448;5354;5355;5623;8727;9228	843;1415;4869;5820;5821;6124;9445;10009	843;1415;4869;5821;6124;9445;10009
P08240;P08240-2	P08240;P08240-2	18;16	18;16	18;16	Signal recognition particle receptor subunit alpha	SRPR	sp|P08240|SRPRA_HUMAN Signal recognition particle receptor subunit alpha OS=Homo sapiens OX=9606 GN=SRPRA PE=1 SV=2;sp|P08240-2|SRPRA_HUMAN Isoform 2 of Signal recognition particle receptor subunit alpha OS=Homo sapiens OX=9606 GN=SRPRA	2	18	18	18	32.4	32.4	32.4	69.81	638	638;610	0	141.28	2187100000	45564000	20				543	202;291;731;1322;1323;2132;2334;2844;3061;3449;3498;4113;4161;4425;5428;5545;5710;6443	True;True;True;True;True;True;True;True;True;True;True;True;True;True;True;True;True;True	220;316;787;1414;1415;2276;2491;3024;3256;3661;3710;4384;4385;4456;4754;5806;5930;6103;6883	320;451;1181;2237;2238;3373;3374;3907;4759;5103;5657;5717;5718;6650;6651;6830;7278;8788;8989;9290;10452	334;469;1240;2431;2432;3617;3618;4257;5202;5560;6159;6220;6221;7207;7208;7416;7906;9506;9725;10071;11312	334;469;1240;2431;2432;3618;4257;5202;5560;6159;6220;7208;7416;7906;9506;9725;10071;11312	225	1
Q9BU23;Q9BU23-2;Q9BU23-3	Q9BU23;Q9BU23-2;Q9BU23-3	9;9;8	9;9;8	9;9;8	Lipase maturation factor 2	LMF2	sp|Q9BU23|LMF2_HUMAN Lipase maturation factor 2 OS=Homo sapiens OX=9606 GN=LMF2 PE=1 SV=2;sp|Q9BU23-2|LMF2_HUMAN Isoform 2 of Lipase maturation factor 2 OS=Homo sapiens OX=9606 GN=LMF2;sp|Q9BU23-3|LMF2_HUMAN Isoform 3 of Lipase maturation factor 2 OS=Homo	3	9	9	9	2020-01-21	2020-01-21	2020-01-21	79697	707	707;682;594	0	137.78	1590100000	45432000	13				1009	1055;1972;3333;3950;4687;4934;5329;5790;6530	True;True;True;True;True;True;True;True;True	1127;2110;3539;4179;5027;5281;5700;5701;6190;6974	1707;3147;5475;6373;7643;8015;8016;8651;8652;8653;9403;9404;10556	1813;3369;5961;6911;8295;8694;8695;9362;9363;9364;10196;10197;11419	1813;3369;5961;6911;8295;8695;9364;10197;11419	502	644
Q00765;B7Z332;B7Z510;H0Y8J8;E2QRG8;Q00765-2	Q00765	3;1;1;1;1;1	3;1;1;1;1;1	3;1;1;1;1;1	Receptor expression-enhancing protein 5	REEP5	sp|Q00765|REEP5_HUMAN Receptor expression-enhancing protein 5 OS=Homo sapiens OX=9606 GN=REEP5 PE=1 SV=3	6	3	3	3	2020-03-15	2020-03-15	2020-03-15	21493	189	189;99;122;145;165;131	0	26798	450060000	45006000	3				726	545;2429;4245	True;True;True	587;2593;4560	886;4047;6963	924;4403;7556	924;4403;7556
Q9NUM3-3;Q9NUM3-2;Q9NUM3;M0QX28	Q9NUM3-3;Q9NUM3-2;Q9NUM3;M0QX28	2;2;2;1	2;2;2;1	2;2;2;1	Zinc transporter ZIP9	SLC39A9	sp|Q9NUM3-3|S39A9_HUMAN Isoform 3 of Zinc transporter ZIP9 OS=Homo sapiens OX=9606 GN=SLC39A9;sp|Q9NUM3-2|S39A9_HUMAN Isoform 2 of Zinc transporter ZIP9 OS=Homo sapiens OX=9606 GN=SLC39A9;sp|Q9NUM3|S39A9_HUMAN Zinc transporter ZIP9 OS=Homo sapiens OX=9606	4	2	2	2	2020-02-14	2020-02-14	2020-02-14	24625	232	232;284;307;241	0	12626	179400000	44849000	3				1070	406;2464	True;True	441;2630	678;4099;4100	708;4455;4456	708;4456
H0Y4R5;Q5SNT2-2;Q5SNT2	H0Y4R5;Q5SNT2-2;Q5SNT2	6;6;6	6;6;6	6;6;6	Transmembrane protein 201	TMEM201	tr|H0Y4R5|H0Y4R5_HUMAN Transmembrane protein 201 (Fragment) OS=Homo sapiens OX=9606 GN=TMEM201 PE=1 SV=1;sp|Q5SNT2-2|TM201_HUMAN Isoform 2 of Transmembrane protein 201 OS=Homo sapiens OX=9606 GN=TMEM201;sp|Q5SNT2|TM201_HUMAN Transmembrane protein 201 OS=Ho	3	6	6	6	2020-07-12	2020-07-12	2020-07-12	59729	552	552;392;666	0	63436	983200000	44691000	9				316	339;1011;1151;2463;4794;4825	True;True;True;True;True;True	366;1081;1232;2629;5138;5169	544;1653;1832;1833;4097;4098;7813;7870;7871	564;1756;1943;1944;4453;4454;8472;8538;8539	564;1756;1944;4453;8472;8539
O75845;E9PPW5;E9PQ91	O75845;E9PPW5;E9PQ91	2;1;1	2;1;1	2;1;1	Lathosterol oxidase	SC5D	sp|O75845|SC5D_HUMAN Lathosterol oxidase OS=Homo sapiens OX=9606 GN=SC5D PE=1 SV=2;tr|E9PPW5|E9PPW5_HUMAN Lathosterol oxidase (Fragment) OS=Homo sapiens OX=9606 GN=SC5D PE=1 SV=1;tr|E9PQ91|E9PQ91_HUMAN Lathosterol oxidase OS=Homo sapiens OX=9606 GN=SC5D PE	3	2	2	2	2020-07-04	2020-07-04	2020-07-04	35.3	299	299;177;228	0	11006	577930000	44456000	1				485	4033;4422	True;True	4278;4751	6518;7275	7071;7903	7071;7903
Q6NTF9;Q6NTF9-2;Q6NTF9-3;Q9UDT1	Q6NTF9;Q6NTF9-2	5;5;2;1	5;5;2;1	5;5;2;1	Rhomboid domain-containing protein 2	RHBDD2	sp|Q6NTF9|RHBD2_HUMAN Rhomboid domain-containing protein 2 OS=Homo sapiens OX=9606 GN=RHBDD2 PE=2 SV=2;sp|Q6NTF9-2|RHBD2_HUMAN Isoform 2 of Rhomboid domain-containing protein 2 OS=Homo sapiens OX=9606 GN=RHBDD2	4	5	5	5	2020-05-16	2020-05-16	2020-05-16	39202	364	364;409;223;79	0	36582	664780000	44319000	6				816	2113;3269;3340;3379;6802	True;True;True;True;True	2256;3473;3546;3589;7267	3352;5376;5504;5564;10952	3596;5842;6000;6064;11831;11832	3596;5842;6000;6064;11831
Q9UKV5;H3BRK9;R4GNG2;H3BSK3;H3BQM3	Q9UKV5	11;5;3;2;1	11;5;3;2;1	11;5;3;2;1	E3 ubiquitin-protein ligase AMFR	AMFR	sp|Q9UKV5|AMFR_HUMAN E3 ubiquitin-protein ligase AMFR OS=Homo sapiens OX=9606 GN=AMFR PE=1 SV=2	5	11	11	11	2020-01-17	2020-01-17	2020-01-17	72995	643	643;288;299;229;165	0	102.67	1358900000	43835000	12				1112	1911;2927;3687;4180;4579;5417;5475;5873;6259;6398;6694	True;True;True;True;True;True;True;True;True;True;True	2044;3114;3908;4481;4918;5794;5856;6277;6685;6831;7153	3035;4859;6021;6022;6856;7520;8773;8881;9545;9546;10111;10352;10802	3251;5304;6546;6547;7442;8170;9491;9607;10351;10352;10946;11202;11676	3251;5304;6546;7442;8170;9491;9607;10351;10946;11202;11676
H0Y6T6;Q8IXM6;Q8IXM6-2	H0Y6T6;Q8IXM6;Q8IXM6-2	6;6;3	6;6;3	6;6;3	Nurim	NRM	tr|H0Y6T6|H0Y6T6_HUMAN Nurim (Fragment) OS=Homo sapiens OX=9606 GN=NRM PE=1 SV=1;sp|Q8IXM6|NRM_HUMAN Nurim OS=Homo sapiens OX=9606 GN=NRM PE=1 SV=1;sp|Q8IXM6-2|NRM_HUMAN Isoform 2 of Nurim OS=Homo sapiens OX=9606 GN=NRM	3	6	6	6	2020-03-23	2020-03-23	2020-03-23	29459	262	262;262;203	0	52119	786560000	43698000	8				320	2275;3436;4768;4930;6621;6806	True;True;True;True;True;True	2428;3648;5111;5277;7072;7271	3725;5640;5641;7750;8010;8011;10705;10957	4046;6142;6143;8404;8689;8690;11577;11837	4046;6142;8404;8690;11577;11837
P30154;P30154-2;P30154-3;P30154-4;P30154-5;H0YDG7	P30154;P30154-2;P30154-3;P30154-4;P30154-5;H0YDG7	21;21;20;18;17;11	21;21;20;18;17;11	15;15;15;12;11;8	Serine/threonine-protein phosphatase 2A 65 kDa regulatory subunit A beta isoform	PPP2R1B	sp|P30154|2AAB_HUMAN Serine/threonine-protein phosphatase 2A 65 kDa regulatory subunit A beta isoform OS=Homo sapiens OX=9606 GN=PPP2R1B PE=1 SV=3;sp|P30154-2|2AAB_HUMAN Isoform 2 of Serine/threonine-protein phosphatase 2A 65 kDa regulatory subunit A beta	6	21	21	15	47.3	47.3	2020-08-31	66213	601	601;667;603;556;474;224	0	175.17	1824000000	43428000	28				614	772;1145;1406;1455;1498;2715;2716;2976;3178;3208;3415;3675;3689;3846;4003;4789;4838;5020;5091;5189;6202	True;True;True;True;True;True;True;True;True;True;True;True;True;True;True;True;True;True;True;True;True	829;1225;1226;1500;1552;1606;2890;2891;3164;3379;3409;3626;3896;3910;4071;4238;5133;5182;5372;5450;5555;6623	1239;1825;1826;2346;2415;2416;2495;4566;4567;4931;4932;5264;5265;5305;5610;6007;6024;6236;6467;7808;7889;7890;8149;8238;8389;10034;10035	1303;1935;1936;2542;2612;2613;2695;4992;4993;5376;5377;5727;5728;5729;5771;6111;6532;6549;6771;7020;8467;8565;8566;8830;8920;9078;10867;10868	1303;1936;2542;2612;2695;4992;4993;5377;5728;5771;6111;6532;6549;6771;7020;8467;8565;8830;8920;9078;10868	296;297	479;585
H3BMF1;H3BUT5;Q8N9A8;Q8N9A8-2	H3BMF1;H3BUT5;Q8N9A8;Q8N9A8-2	1;1;1;1	1;1;1;1	1;1;1;1	Nuclear envelope phosphatase-regulatory subunit 1	CNEP1R1	tr|H3BMF1|H3BMF1_HUMAN Nuclear envelope phosphatase-regulatory subunit 1 (Fragment) OS=Homo sapiens OX=9606 GN=CNEP1R1 PE=1 SV=1;tr|H3BUT5|H3BUT5_HUMAN Nuclear envelope phosphatase-regulatory subunit 1 OS=Homo sapiens OX=9606 GN=CNEP1R1 PE=1 SV=1;sp|Q8N9A8	4	1	1	1	2020-05-12	2020-05-12	2020-05-12	89525	80	80;93;125;142	0.00096154	63563	171890000	42974000	1				340	6386	True	6819	10338	11186	11186
Q9P0S3;F6WST4;A0A1B0GXE7	Q9P0S3	5;2;2	5;2;2	2;0;0	ORM1-like protein 1	ORMDL1	sp|Q9P0S3|ORML1_HUMAN ORM1-like protein 1 OS=Homo sapiens OX=9606 GN=ORMDL1 PE=1 SV=1	3	5	5	2	39.9	39.9	2020-03-18	17371	153	153;108;109	0	43245	340920000	42616000	6				1094	2337;2691;4155;4158;6584	True;True;True;True;True	2496;2866;4449;4453;7034	3913;4540;6821;6827;10654;10655	4263;4966;7406;7413;11526;11527	4263;4966;7406;7413;11527	414	1
Q99832;Q99832-3;Q99832-4;Q99832-2;F8WAM2;F8WBP8;A0A0D9SG95	Q99832;Q99832-3;Q99832-4;Q99832-2	16;14;12;8;4;2;1	16;14;12;8;4;2;1	16;14;12;8;4;2;1	T-complex protein 1 subunit eta	CCT7	sp|Q99832|TCPH_HUMAN T-complex protein 1 subunit eta OS=Homo sapiens OX=9606 GN=CCT7 PE=1 SV=2;sp|Q99832-3|TCPH_HUMAN Isoform 3 of T-complex protein 1 subunit eta OS=Homo sapiens OX=9606 GN=CCT7;sp|Q99832-4|TCPH_HUMAN Isoform 4 of T-complex protein 1 subun	7	16	16	16	37.4	37.4	37.4	59366	543	543;499;456;339;98;83;83	0	140.6	1694400000	42359000	19				993	528;627;700;962;1329;2118;2623;2860;3525;3713;4138;4220;4674;5214;5500;5512	True;True;True;True;True;True;True;True;True;True;True;True;True;True;True;True	566;676;753;1029;1421;2262;2797;3045;3738;3934;4419;4530;4531;5014;5580;5883;5895	856;1028;1131;1594;2245;3359;4453;4781;4782;5803;6056;6702;6929;6930;6931;7627;8418;8419;8925;8943	892;1082;1187;1696;2439;3603;4874;5225;5226;6325;6582;7277;7522;7523;7524;8278;9107;9108;9653;9673	892;1082;1187;1696;2439;3603;4874;5226;6325;6582;7277;7523;8278;9107;9653;9673	493;494	160;178
Q96FK6;G3V4B8	Q96FK6;G3V4B8	8;5	8;5	8;5	WD repeat-containing protein 89	WDR89	sp|Q96FK6|WDR89_HUMAN WD repeat-containing protein 89 OS=Homo sapiens OX=9606 GN=WDR89 PE=2 SV=1;tr|G3V4B8|G3V4B8_HUMAN WD repeat-containing protein 89 (Fragment) OS=Homo sapiens OX=9606 GN=WDR89 PE=1 SV=1	2	8	8	8	2020-06-27	2020-06-27	2020-06-27	43214	387	387;226	0	129.28	1007400000	41974000	12				962	1059;1200;1516;1690;2674;3679;5531;5932	True;True;True;True;True;True;True;True	1131;1285;1624;1808;2849;3900;5914;6340	1712;1713;1895;1896;2514;2740;4519;4520;6011;8972;8973;9623	1818;1819;2009;2010;2715;2951;4945;4946;6536;9708;9709;10430	1818;2010;2715;2951;4946;6536;9708;10430
Q9H0U4;E9PLD0;Q92928	Q9H0U4;E9PLD0;Q92928	9;7;5	3;2;1	3;2;1	Ras-related protein Rab-1B;Putative Ras-related protein Rab-1C	RAB1B;RAB1C	sp|Q9H0U4|RAB1B_HUMAN Ras-related protein Rab-1B OS=Homo sapiens OX=9606 GN=RAB1B PE=1 SV=1;tr|E9PLD0|E9PLD0_HUMAN Ras-related protein Rab-1B OS=Homo sapiens OX=9606 GN=RAB1B PE=1 SV=1;sp|Q92928|RAB1C_HUMAN Putative Ras-related protein Rab-1C OS=Homo sapie	3	9	3	3	51.2	2020-09-23	2020-09-23	22171	201	201;169;201	0	40171	754750000	41930000	6				1029	1276;2019;3569;3636;4149;4238;5042;5644;6559	False;True;False;False;True;True;False;False;False	1367;2157;3782;3852;4440;4441;4551;4552;5394;6034;7004	2058;3205;5866;5867;5950;5951;6812;6813;6953;6954;6955;8173;9207;10613	2196;3427;6390;6391;6474;6475;7397;7398;7546;7547;7548;8854;9988;11480	2196;3427;6390;6474;7398;7547;8854;9988;11480	508;509	1;163
A6NP52;O60831	A6NP52;O60831	2;2	2;2	2;2	PRA1 family protein 2	PRAF2	tr|A6NP52|A6NP52_HUMAN PRA1 family protein OS=Homo sapiens OX=9606 GN=PRAF2 PE=1 SV=1;sp|O60831|PRAF2_HUMAN PRA1 family protein 2 OS=Homo sapiens OX=9606 GN=PRAF2 PE=1 SV=1	2	2	2	2	2020-08-13	2020-08-13	2020-08-13	17188	160	160;178	0	14555	373840000	41538000	2				127	303;3152	True;True	328;3353	467;5233	485;5694	485;5694
Q6UX07;Q6UX07-2;Q6UX07-3	Q6UX07;Q6UX07-2;Q6UX07-3	9;9;7	9;9;7	9;9;7	Dehydrogenase/reductase SDR family member 13	DHRS13	sp|Q6UX07|DHR13_HUMAN Dehydrogenase/reductase SDR family member 13 OS=Homo sapiens OX=9606 GN=DHRS13 PE=2 SV=1;sp|Q6UX07-2|DHR13_HUMAN Isoform 2 of Dehydrogenase/reductase SDR family member 13 OS=Homo sapiens OX=9606 GN=DHRS13;sp|Q6UX07-3|DHR13_HUMAN Isofo	3	9	9	9	36.9	36.9	36.9	40848	377	377;327;296	0	76356	946190000	41139000	10				830	1160;1389;2120;3197;4191;4738;6232;6435;6610	True;True;True;True;True;True;True;True;True	1241;1483;2264;3398;4493;5078;6657;6875;7061	1843;2326;3361;5291;6869;7707;7708;10075;10076;10442;10691	1954;2520;3605;5756;7455;8359;8360;10909;10910;11302;11563	1954;2520;3605;5756;7455;8359;10909;11302;11563
Q5H8X8;O95399;O95399-2	Q5H8X8;O95399;O95399-2	1;1;1	1;1;1	1;1;1	Urotensin-2	UTS2	tr|Q5H8X8|Q5H8X8_HUMAN Urotensin-2 OS=Homo sapiens OX=9606 GN=UTS2 PE=1 SV=1;sp|O95399|UTS2_HUMAN Urotensin-2 OS=Homo sapiens OX=9606 GN=UTS2 PE=1 SV=1;sp|O95399-2|UTS2_HUMAN Isoform 2 of Urotensin-2 OS=Homo sapiens OX=9606 GN=UTS2	3	1	1	1	2020-08-05	2020-08-05	2020-08-05	16276	139	139;124;139	0.00095969	63407	362400000	40267000	1				505	3882	True	4109	6278	6813	6813
Q3ZCM7;A0A075B736;Q5SQY0	Q3ZCM7;A0A075B736;Q5SQY0	9;8;8	1;1;1	1;1;1	Tubulin beta-8 chain	TUBB8	sp|Q3ZCM7|TBB8_HUMAN Tubulin beta-8 chain OS=Homo sapiens OX=9606 GN=TUBB8 PE=1 SV=2;tr|A0A075B736|A0A075B736_HUMAN Tubulin beta chain OS=Homo sapiens OX=9606 GN=TUBB8 PE=1 SV=1;tr|Q5SQY0|Q5SQY0_HUMAN Tubulin beta chain OS=Homo sapiens OX=9606 GN=TUBB8 PE=	3	9	1	1	2020-03-24	2020-02-07	2020-02-07	49775	444	444;407;410	0	28727	882210000	40101000	1				788	579;1157;1902;1903;2931;3225;3431;4384;5502	False;True;False;False;False;False;False;False;False	624;625;1238;2035;2036;3119;3428;3429;3642;3643;4708;4709;4710;5885	968;969;970;1840;3024;3025;4865;5326;5327;5328;5633;5634;5635;7221;7222;7223;7224;8929;8930	1020;1021;1022;1951;3240;3241;5310;5792;5793;5794;6135;6136;6137;7845;7846;7847;7848;9657;9658;9659	1021;1951;3240;3241;5310;5793;6137;7847;9658	20;21;22;212;382	73;257;267;299;300
H7C484;Q9H2C2;A0A0A0MRI7;H7C0E7;F6QB42;H0YEB4	H7C484;Q9H2C2;A0A0A0MRI7;H7C0E7;F6QB42	7;7;6;6;5;2	7;7;6;6;5;2	7;7;6;6;5;2	Protein ARV1	ARV1	tr|H7C484|H7C484_HUMAN Protein ARV1 (Fragment) OS=Homo sapiens OX=9606 GN=ARV1 PE=1 SV=1;sp|Q9H2C2|ARV1_HUMAN Protein ARV1 OS=Homo sapiens OX=9606 GN=ARV1 PE=1 SV=1;tr|A0A0A0MRI7|A0A0A0MRI7_HUMAN Protein ARV1 OS=Homo sapiens OX=9606 GN=ARV1 PE=1 SV=1;tr|H7	6	7	7	7	33.6	33.6	33.6	30693	268	268;271;231;291;247;122	0	99.5	715220000	39734000	7				360	340;1133;1659;2249;6013;6551;6662	True;True;True;True;True;True;True	367;1211;1775;2401;6425;6996;7118	545;1811;2703;3613;9725;10603;10759	565;1921;2914;3911;10534;11470;11632	565;1921;2914;3911;10534;11470;11632
P0CG48;F5GYU3;Q96C32;Q5PY61;J3QKN0;F5GXK7;F5H747;F5H388;B4DV12;F5H265;F5H2Z3;F5H6Q2;J3QTR3;J3QS39;P62987;P62979;P0CG47;M0R2S1;M0R1M6;Q49A90;A0A2R8Y422;M0R1V7;F5GZ39;J3QSA3	P0CG48;F5GYU3;Q96C32;Q5PY61;J3QKN0;F5GXK7;F5H747;F5H388;B4DV12;F5H265;F5H2Z3;F5H6Q2;J3QTR3;J3QS39;P62987;P62979;P0CG47;M0R2S1;M0R1M6;Q49A90;A0A2R8Y422;M0R1V7;F5GZ39;J3QSA3	4;4;4;4;4;4;4;4;4;4;4;4;4;4;4;4;4;3;3;3;3;3;2;2	4;4;4;4;4;4;4;4;4;4;4;4;4;4;4;4;4;3;3;3;3;3;2;2	4;4;4;4;4;4;4;4;4;4;4;4;4;4;4;4;4;3;3;3;3;3;2;2	Polyubiquitin-C;Ubiquitin;Ubiquitin-60S ribosomal protein L40;Ubiquitin;60S ribosomal protein L40;Ubiquitin-40S ribosomal protein S27a;Ubiquitin;40S ribosomal protein S27a;Polyubiquitin-B;Ubiquitin	UBC;UBB;RPS27A;UBA52	sp|P0CG48|UBC_HUMAN Polyubiquitin-C OS=Homo sapiens OX=9606 GN=UBC PE=1 SV=3;tr|F5GYU3|F5GYU3_HUMAN Polyubiquitin-C (Fragment) OS=Homo sapiens OX=9606 GN=UBC PE=1 SV=1;tr|Q96C32|Q96C32_HUMAN Polyubiquitin-C OS=Homo sapiens OX=9606 GN=UBC PE=1 SV=1;tr|Q5PY6	24	4	4	4	56.5	56.5	56.5	77038	685	685;134;305;229;206;169;160;155;153;149;136;122;106;93;128;156;229;138;114;95;156;63;61;43	0	39219	2847400000	39547000	5				143	1311;1576;5643;5689	True;True;True;True	1403;1686;6033;6081	2223;2595;9206;9258	2415;2416;2805;9987;10039	2416;2805;9987;10039
Q9NRZ7-2;Q9NRZ7;Q9NRZ7-3;C9JL26;C9J184	Q9NRZ7-2;Q9NRZ7;Q9NRZ7-3	9;9;9;4;1	9;9;9;4;1	9;9;9;4;1	1-acyl-sn-glycerol-3-phosphate acyltransferase gamma	AGPAT3	sp|Q9NRZ7-2|PLCC_HUMAN Isoform 2 of 1-acyl-sn-glycerol-3-phosphate acyltransferase gamma OS=Homo sapiens OX=9606 GN=AGPAT3;sp|Q9NRZ7|PLCC_HUMAN 1-acyl-sn-glycerol-3-phosphate acyltransferase gamma OS=Homo sapiens OX=9606 GN=AGPAT3 PE=1 SV=1;sp|Q9NRZ7-3|PLC	5	9	9	9	2020-08-24	2020-08-24	2020-08-24	36271	314	314;376;396;255;128	0	52857	848610000	38573000	9				1065	1143;1796;2114;2315;3142;3463;4969;6323;6650	True;True;True;True;True;True;True;True;True	1223;1922;2257;2471;3343;3675;5319;6754;7104	1823;2878;3353;3813;5220;5678;8081;10243;10740	1933;3090;3597;4143;5681;6181;8762;11083;11612	1933;3090;3597;4143;5681;6181;8762;11083;11612
Q6UWP7-3;Q6UWP7;C9K0C3;Q6UWP7-2;C9J5S5;C9JA02;C9JMW2;C9JUV9;C9JXY8;C9J6F4	Q6UWP7-3;Q6UWP7	7;7;3;3;1;1;1;1;1;1	7;7;3;3;1;1;1;1;1;1	7;7;3;3;1;1;1;1;1;1	Lysocardiolipin acyltransferase 1	LCLAT1	sp|Q6UWP7-3|LCLT1_HUMAN Isoform 3 of Lysocardiolipin acyltransferase 1 OS=Homo sapiens OX=9606 GN=LCLAT1;sp|Q6UWP7|LCLT1_HUMAN Lysocardiolipin acyltransferase 1 OS=Homo sapiens OX=9606 GN=LCLAT1 PE=1 SV=1	10	7	7	7	21	21	21	44561	376	376;414;157;308;105;123;136;137;140;153	0	56.17	920850000	38369000	9				828	1215;1363;4336;5791;6086;6609;6746	True;True;True;True;True;True;True	1300;1456;4655;6191;6502;7060;7209	1914;2291;2292;7158;9405;9828;10689;10690;10875	2028;2485;2486;7782;10198;10639;11561;11562;11752	2028;2486;7782;10198;10639;11562;11752
O43292;O43292-2;E9PPZ9;E9PLV6;E9PQ31;E9PLG8;E9PM11;Q86UP3-3	O43292;O43292-2	9;8;4;3;3;2;1;1	9;8;4;3;3;2;1;1	9;8;4;3;3;2;1;1	Glycosylphosphatidylinositol anchor attachment 1 protein	GPAA1	sp|O43292|GPAA1_HUMAN Glycosylphosphatidylinositol anchor attachment 1 protein OS=Homo sapiens OX=9606 GN=GPAA1 PE=1 SV=3;sp|O43292-2|GPAA1_HUMAN Isoform 2 of Glycosylphosphatidylinositol anchor attachment 1 protein OS=Homo sapiens OX=9606 GN=GPAA1	8	9	9	9	2020-02-18	2020-02-18	2020-02-18	67622	621	621;561;260;234;273;81;158;1049	0	61264	908540000	37856000	10				450	73;2130;2172;3102;3441;3673;4549;5122;6425	True;True;True;True;True;True;True;True;True	79;2274;2317;3298;3653;3894;4884;5486;6865	142;143;3371;3447;5155;5648;6005;7475;8285;10431	147;148;3615;3707;5615;6150;6530;8125;8967;11291	147;3615;3707;5615;6150;6530;8125;8967;11291
C9JE12;C9JCW7;Q9BVT8	C9JE12;C9JCW7;Q9BVT8	3;3;3	3;3;3	3;3;3	Transmembrane and ubiquitin-like domain-containing protein 1	TMUB1	tr|C9JE12|C9JE12_HUMAN Transmembrane and ubiquitin-like domain-containing protein 1 (Fragment) OS=Homo sapiens OX=9606 GN=TMUB1 PE=1 SV=1;tr|C9JCW7|C9JCW7_HUMAN Transmembrane and ubiquitin-like domain-containing protein 1 (Fragment) OS=Homo sapiens OX=9606	3	3	3	3	2020-07-21	2020-07-21	2020-07-21	2020-12-16	152	152;170;246	0	21768	264750000	37822000	3				173	610;1857;2064	True;True;True	658;1984;2205	1006;2952;3267	1059;3166;3491	1059;3166;3491
P49427;U3KQ77;U3KPV8	P49427	3;1;1	3;1;1	3;1;1	Ubiquitin-conjugating enzyme E2 R1	CDC34	sp|P49427|UB2R1_HUMAN Ubiquitin-conjugating enzyme E2 R1 OS=Homo sapiens OX=9606 GN=CDC34 PE=1 SV=2	3	3	3	3	2020-09-11	2020-09-11	2020-09-11	26736	236	236;119;146	0	21701	414610000	37692000	3				654	1044;2218;4598	True;True;True	1116;2368;4937	1695;3549;7542	1801;3829;8192	1801;3829;8192
O75489;E9PS48;O75489-2;E9PKL8;G3V194	O75489	11;3;3;1;1	11;3;3;1;1	11;3;3;1;1	NADH dehydrogenase [ubiquinone] iron-sulfur protein 3, mitochondrial	NDUFS3	sp|O75489|NDUS3_HUMAN NADH dehydrogenase [ubiquinone] iron-sulfur protein 3, mitochondrial OS=Homo sapiens OX=9606 GN=NDUFS3 PE=1 SV=1	5	11	11	11	50.8	50.8	50.8	30241	264	264;161;132;77;121	0	84632	737110000	36855000	11				481	59;823;875;1382;1746;2841;3072;4832;5255;5872;6570	True;True;True;True;True;True;True;True;True;True;True	65;880;935;1476;1868;3021;3267;5176;5621;6276;7015	123;1312;1399;2318;2816;4756;5116;7878;8559;9544;10630	128;1380;1475;2512;3028;5199;5573;8546;9269;10350;11502	128;1380;1475;2512;3028;5199;5573;8546;9269;10350;11502
H0Y512;Q9HDC9;Q9HDC9-2	H0Y512;Q9HDC9;Q9HDC9-2	9;9;7	9;9;7	9;9;7	Adipocyte plasma membrane-associated protein	APMAP	tr|H0Y512|H0Y512_HUMAN Adipocyte plasma membrane-associated protein (Fragment) OS=Homo sapiens OX=9606 GN=APMAP PE=1 SV=1;sp|Q9HDC9|APMAP_HUMAN Adipocyte plasma membrane-associated protein OS=Homo sapiens OX=9606 GN=APMAP PE=1 SV=2;sp|Q9HDC9-2|APMAP_HUMAN	3	9	9	9	34.2	34.2	34.2	45294	409	409;416;289	0	102.97	912240000	36489000	11				318	1514;1906;2193;3306;3332;3579;5217;6155;6471	True;True;True;True;True;True;True;True;True	1622;2039;2340;3512;3538;3792;5583;6574;6912	2511;2512;3028;3029;3514;5443;5474;5880;8424;9918;10488	2712;2713;3244;3245;3794;5927;5960;6404;9113;10730;11348	2713;3245;3794;5927;5960;6404;9113;10730;11348
Q9UMS4;F5GY56;F5H2I0;H0YGF3;H0YGZ5	Q9UMS4;F5GY56	7;5;2;1;1	7;5;2;1;1	7;5;2;1;1	Pre-mRNA-processing factor 19	PRPF19	sp|Q9UMS4|PRP19_HUMAN Pre-mRNA-processing factor 19 OS=Homo sapiens OX=9606 GN=PRPF19 PE=1 SV=1;tr|F5GY56|F5GY56_HUMAN Pre-mRNA-processing factor 19 (Fragment) OS=Homo sapiens OX=9606 GN=PRPF19 PE=1 SV=1	5	7	7	7	22	22	22	55.18	504	504;252;104;45;119	0	60725	874970000	36457000	8				1116	1172;1807;3025;4732;4902;5840;6655	True;True;True;True;True;True;True	1254;1933;3217;5072;5247;6243;7111	1862;2895;5004;7699;7970;7971;9508;9509;10751	1974;3108;5449;8351;8647;8648;10312;10313;11624	1974;3108;5449;8351;8647;10313;11624
P27348;E9PG15	P27348;E9PG15	11;7	7;5	7;5	14-3-3 protein theta	YWHAQ	sp|P27348|1433T_HUMAN 14-3-3 protein theta OS=Homo sapiens OX=9606 GN=YWHAQ PE=1 SV=1;tr|E9PG15|E9PG15_HUMAN 14-3-3 protein theta (Fragment) OS=Homo sapiens OX=9606 GN=YWHAQ PE=1 SV=1	2	11	7	7	53.1	39.2	39.2	27764	245	245;149	0	94287	752080000	35813000	7				600	595;1067;1472;3164;4362;4889;5152;5469;6573;6679;6699	True;False;False;False;False;True;True;True;True;True;True	643;1139;1140;1578;1579;3365;4683;5234;5517;5850;7020;7138;7158	988;1721;1722;1723;2466;2467;2468;5245;7192;7954;8333;8873;8874;10635;10785;10786;10807	1040;1827;1828;1829;2666;2667;2668;5706;5707;7816;8630;9017;9599;9600;11507;11659;11660;11681	1040;1827;2667;5707;7816;8630;9017;9599;11507;11659;11681	288;289	160;218
P50991-2;P50991	P50991-2;P50991	16;16	16;16	16;16	T-complex protein 1 subunit delta	CCT4	sp|P50991-2|TCPD_HUMAN Isoform 2 of T-complex protein 1 subunit delta OS=Homo sapiens OX=9606 GN=CCT4;sp|P50991|TCPD_HUMAN T-complex protein 1 subunit delta OS=Homo sapiens OX=9606 GN=CCT4 PE=1 SV=4	2	16	16	16	45.2	45.2	45.2	54719	509	509;539	0	133.46	1355900000	35681000	18				660	166;324;620;756;885;2161;2162;2165;2711;3079;3388;3920;4517;5579;6067;6324	True;True;True;True;True;True;True;True;True;True;True;True;True;True;True;True	181;351;669;813;945;2306;2307;2310;2886;3275;3598;4149;4852;5967;6483;6755	274;525;1019;1216;1217;1411;3428;3429;3432;3433;4562;5125;5126;5575;6336;7441;9117;9803;10244	288;545;1072;1278;1279;1487;3688;3689;3692;3693;4988;5582;5583;6075;6874;8091;9892;10612;11084	288;545;1072;1278;1487;3688;3689;3692;4988;5582;6075;6874;8091;9892;10612;11084
P51665;H3BNT7;H3BTM8;H3BQV2	P51665;H3BNT7;H3BTM8	6;4;4;1	6;4;4;1	6;4;4;1	26S proteasome non-ATPase regulatory subunit 7	PSMD7	sp|P51665|PSMD7_HUMAN 26S proteasome non-ATPase regulatory subunit 7 OS=Homo sapiens OX=9606 GN=PSMD7 PE=1 SV=2;tr|H3BNT7|H3BNT7_HUMAN 26S proteasome non-ATPase regulatory subunit 7 OS=Homo sapiens OX=9606 GN=PSMD7 PE=1 SV=1;tr|H3BTM8|H3BTM8_HUMAN 26S prot	4	6	6	6	2020-06-25	2020-06-25	2020-06-25	37025	324	324;177;198;43	0	49.21	784650000	35666000	7				667	2977;2998;5442;5558;6399;6430	True;True;True;True;True;True	3165;3187;5820;5945;6832;6870	4933;4966;8806;8807;9067;9068;10353;10436	5378;5411;9524;9525;9827;9828;11203;11296	5378;5411;9524;9827;11203;11296
A1L0T0;M0R026;E9PJS0;M0R1B5;M0QZX5;E9PL44	A1L0T0;M0R026;E9PJS0	12;10;6;4;4;2	12;10;6;4;4;2	12;10;6;4;4;2	Acetolactate synthase-like protein	ILVBL	sp|A1L0T0|ILVBL_HUMAN Acetolactate synthase-like protein OS=Homo sapiens OX=9606 GN=ILVBL PE=1 SV=2;tr|M0R026|M0R026_HUMAN Acetolactate synthase-like protein OS=Homo sapiens OX=9606 GN=ILVBL PE=1 SV=1;tr|E9PJS0|E9PJS0_HUMAN Acetolactate synthase-like prote	6	12	12	12	2020-05-25	2020-05-25	2020-05-25	67867	632	632;525;262;165;229;166	0	107.17	1317800000	35615000	15				115	53;80;844;902;1476;1483;1710;1811;2443;3037;4612;6146	True;True;True;True;True;True;True;True;True;True;True;True	57;87;88;902;963;1584;1591;1828;1937;2608;3230;4951;6565	113;153;154;1339;1340;1433;2473;2480;2768;2899;4067;5036;7556;9905;9906	118;158;159;1407;1408;1509;2673;2680;2980;3112;4423;5483;8206;10717;10718	118;159;1407;1509;2673;2680;2980;3112;4423;5483;8206;10718	44	320
Q8WUY1;H0YAR9	Q8WUY1	7;3	7;3	7;3	Protein THEM6	THEM6	sp|Q8WUY1|THEM6_HUMAN Protein THEM6 OS=Homo sapiens OX=9606 GN=THEM6 PE=1 SV=2	2	7	7	7	38.9	38.9	38.9	23865	208	208;83	0	41823	625330000	34741000	8				920	840;3535;3556;3696;5001;6171;6421	True;True;True;True;True;True;True	898;3748;3769;3917;5353;6591;6861	1334;5814;5849;6035;8125;9968;10425;10426	1402;6336;6373;6560;8806;10795;11285;11286	1402;6336;6373;6560;8806;10795;11285
P05023;P05023-4;P05023-3;P05023-2;P50993;B1AKY9;A0A2R8YEY8;P13637-3;P13637-2;P13637;H0Y7C1;A0A0A0MT26;M0R116;Q5TC01;Q5TC02;Q13733;P20648;E9PRA5;M0QXF2;Q5TC05	P05023;P05023-4;P05023-3;P05023-2	23;23;22;15;9;9;8;8;8;8;8;8;8;4;4;4;3;1;1;1	23;23;22;15;9;9;8;8;8;8;8;8;8;4;4;4;3;1;1;1	20;20;19;14;6;6;5;5;5;5;5;5;5;4;4;1;1;1;1;1	Sodium/potassium-transporting ATPase subunit alpha-1	ATP1A1	sp|P05023|AT1A1_HUMAN Sodium/potassium-transporting ATPase subunit alpha-1 OS=Homo sapiens OX=9606 GN=ATP1A1 PE=1 SV=1;sp|P05023-4|AT1A1_HUMAN Isoform 4 of Sodium/potassium-transporting ATPase subunit alpha-1 OS=Homo sapiens OX=9606 GN=ATP1A1;sp|P05023-3|A	20	23	23	20	2020-04-27	2020-04-27	2020-05-24	112.89	1023	1023;1023;992;681;1020;1009;1010;1026;1024;1013;714;1226;983;144;106;1029;1035;517;251;157	0	209.85	1979700000	34732000	25				528	100;566;711;743;852;1536;1644;2362;2619;2993;3457;3469;3678;3820;4200;4450;4756;5295;5942;6091;6602;6641;6652	True;True;True;True;True;True;True;True;True;True;True;True;True;True;True;True;True;True;True;True;True;True;True	108;610;764;799;910;1644;1760;2521;2793;3182;3669;3681;3899;4044;4505;4782;5098;5666;6350;6508;7052;7093;7107	174;949;1144;1196;1348;2540;2682;3942;4449;4960;5671;5684;6010;6190;6882;7339;7735;8608;9633;9838;9839;10677;10728;10744;10745	179;1001;1201;1256;1416;2741;2893;4294;4870;5405;6174;6187;6535;6717;7468;7981;8388;9318;10440;10649;10650;11549;11600;11617;11618	179;1001;1201;1256;1416;2741;2893;4294;4870;5405;6174;6187;6535;6717;7468;7981;8388;9318;10440;10649;11549;11600;11617	202	615
P61201;B4DIH5;P61201-2;H0YKU5;H0YM03;H0YMC2	P61201;B4DIH5;P61201-2;H0YKU5	14;13;13;8;6;2	14;13;13;8;6;2	14;13;13;8;6;2	COP9 signalosome complex subunit 2	COPS2	sp|P61201|CSN2_HUMAN COP9 signalosome complex subunit 2 OS=Homo sapiens OX=9606 GN=COPS2 PE=1 SV=1;tr|B4DIH5|B4DIH5_HUMAN cDNA FLJ52928, highly similar to COP9 signalosome complex subunit 2 OS=Homo sapiens OX=9606 GN=COPS2 PE=1 SV=1;sp|P61201-2|CSN2_HUMAN	6	14	14	14	35.2	35.2	35.2	51596	443	443;379;450;263;183;55	0	125.9	1110000000	34686000	17				702	252;381;1339;1429;2665;2728;4486;4819;4820;4826;4845;5018;6135;6715	True;True;True;True;True;True;True;True;True;True;True;True;True;True	273;412;1432;1525;2840;2903;4821;5163;5164;5170;5189;5370;6554;7174	394;395;643;2262;2380;4508;4580;7400;7862;7863;7864;7872;7897;8146;8147;9891;10825	412;413;673;2456;2576;4934;5006;8045;8530;8531;8532;8540;8573;8827;8828;10702;11700	413;673;2456;2576;4934;5006;8045;8531;8532;8540;8573;8827;10702;11700
Q9P0B6	Q9P0B6	2	2	2	Coiled-coil domain-containing protein 167	CCDC167	sp|Q9P0B6|CC167_HUMAN Coiled-coil domain-containing protein 167 OS=Homo sapiens OX=9606 GN=CCDC167 PE=1 SV=2	1	2	2	2	2020-07-22	2020-07-22	2020-07-22	11459	97	97	0	13055	242710000	34672000	1				1091	1448;1488	True;True	1545;1596	2406;2485	2603;2685	2603;2685
Q9BUV8-4;Q9BUV8-3;Q9BUV8-2;Q9BUV8;Q9BUV8-5	Q9BUV8-4;Q9BUV8-3;Q9BUV8-2;Q9BUV8;Q9BUV8-5	3;3;3;3;3	3;3;3;3;3	3;3;3;3;3	Uncharacterized protein C20orf24	C20orf24	sp|Q9BUV8-4|RAB5I_HUMAN Isoform 4 of Uncharacterized protein RAB5IF OS=Homo sapiens OX=9606 GN=RAB5IF;sp|Q9BUV8-3|RAB5I_HUMAN Isoform 3 of Uncharacterized protein RAB5IF OS=Homo sapiens OX=9606 GN=RAB5IF;sp|Q9BUV8-2|RAB5I_HUMAN Isoform 2 of Uncharacterized	5	3	3	3	2020-04-26	2020-04-26	2020-04-26	1953-09-01	87	87;128;129;137;143	0	42256	275480000	34434000	4				1012	1264;3058;5049	True;True;True	1353;3253;5402	1980;5099;5100;8181	2102;5556;5557;8862	2102;5557;8862
Q9NX62;H0YBS3;H0YB38	Q9NX62	8;2;1	8;2;1	8;2;1	Inositol monophosphatase 3	IMPAD1	sp|Q9NX62|IMPA3_HUMAN Inositol monophosphatase 3 OS=Homo sapiens OX=9606 GN=IMPAD1 PE=1 SV=1	3	8	8	8	2020-04-28	2020-04-28	2020-04-28	38681	359	359;82;82	0	66447	860030000	34401000	11				1079	126;1569;1938;4146;4198;4529;4604;6114	True;True;True;True;True;True;True;True	138;1679;2073;4436;4437;4502;4503;4864;4943;6532	226;2588;3075;3076;6807;6808;6809;6879;6880;7453;7548;9867	240;2798;3292;3293;7392;7393;7394;7465;7466;8103;8198;10678	240;2798;3293;7392;7466;8103;8198;10678	536;537;538	106;203;341
E7ETY7;Q8TED1	E7ETY7;Q8TED1	5;5	5;5	5;5	Glutathione peroxidase;Probable glutathione peroxidase 8	GPX8	tr|E7ETY7|E7ETY7_HUMAN Glutathione peroxidase OS=Homo sapiens OX=9606 GN=GPX8 PE=1 SV=1;sp|Q8TED1|GPX8_HUMAN Probable glutathione peroxidase 8 OS=Homo sapiens OX=9606 GN=GPX8 PE=1 SV=2	2	5	5	5	2020-07-29	2020-07-29	2020-07-29	2020-09-18	158	158;209	0	31354	480310000	34308000	5				247	1622;1876;2802;4489;6716	True;True;True;True;True	1735;2004;2979;4824;7175	2653;2978;4699;7403;10826	2864;3192;5139;8048;11701	2864;3192;5139;8048;11701
Q8NF37;A0A0G2JQ62;A0A0G2JRI7	Q8NF37;A0A0G2JQ62	13;11;5	13;11;5	13;11;5	Lysophosphatidylcholine acyltransferase 1	LPCAT1	sp|Q8NF37|PCAT1_HUMAN Lysophosphatidylcholine acyltransferase 1 OS=Homo sapiens OX=9606 GN=LPCAT1 PE=1 SV=2;tr|A0A0G2JQ62|A0A0G2JQ62_HUMAN Lysophosphatidylcholine acyltransferase 1 (Fragment) OS=Homo sapiens OX=9606 GN=LPCAT1 PE=1 SV=1	3	13	13	13	32	32	32	59151	534	534;489;234	0	102.3	956750000	34170000	14				903	61;896;1504;2201;2969;4225;4413;4532;4648;4695;5478;5660;5711	True;True;True;True;True;True;True;True;True;True;True;True;True	67;956;1612;2348;3157;4536;4741;4867;4988;5035;5859;6050;6104	125;1424;2501;3526;4922;4923;6936;7259;7456;7601;7651;8884;9224;9291	130;1500;2702;3806;5367;5368;7529;7886;8106;8252;8303;9610;10005;10072	130;1500;2702;3806;5368;7529;7886;8106;8252;8303;9610;10005;10072
H0YNF6;B3KT51;E7EPS7;H0YNS4;Q9BRN9-2;Q9BRN9	H0YNF6;B3KT51;E7EPS7;H0YNS4;Q9BRN9-2;Q9BRN9	3;3;3;3;3;3	3;3;3;3;3;3	3;3;3;3;3;3	TM2 domain-containing protein 3	TM2D3	tr|H0YNF6|H0YNF6_HUMAN TM2 domain-containing protein 3 (Fragment) OS=Homo sapiens OX=9606 GN=TM2D3 PE=1 SV=1;tr|B3KT51|B3KT51_HUMAN TM2 domain containing 3, isoform CRA_a OS=Homo sapiens OX=9606 GN=TM2D3 PE=1 SV=1;tr|E7EPS7|E7EPS7_HUMAN TM2 domain-containi	6	3	3	3	18	18	18	18074	161	161;182;183;209;221;247	0	29797	374530000	34048000	4				140	876;4636;4657	True;True;True	936;4976;4997	1400;1401;7588;7610	1476;1477;8239;8261	1476;8239;8261
H0YI10;F8VXY1;Q8N5B7;Q8N5B7-2;Q49AQ3;F8W1K4;F8W1Z3;F8W1N7;F8VQZ6;H0YIG1;F8VY42;F8VSK7;H0YHG4;B4DQR7	H0YI10;F8VXY1;Q8N5B7;Q8N5B7-2;Q49AQ3	6;6;6;5;4;1;1;1;1;1;1;1;1;1	5;5;5;4;4;1;1;1;1;1;1;1;1;1	5;5;5;4;4;1;1;1;1;1;1;1;1;1	Ceramide synthase 5	CERS5;LASS5	tr|H0YI10|H0YI10_HUMAN Ceramide synthase 5 (Fragment) OS=Homo sapiens OX=9606 GN=CERS5 PE=1 SV=2;tr|F8VXY1|F8VXY1_HUMAN Ceramide synthase 5 OS=Homo sapiens OX=9606 GN=CERS5 PE=1 SV=1;sp|Q8N5B7|CERS5_HUMAN Ceramide synthase 5 OS=Homo sapiens OX=9606 GN=CERS	14	6	5	5	2020-09-25	2020-02-23	2020-02-23	30518	259	259;351;392;334;195;66;73;77;77;78;93;93;136;179	0	37379	578160000	34009000	7				296	1703;2474;4424;4804;6001;6038	False;True;True;True;True;True	1821;2640;4753;5148;6412;6452	2760;4114;4115;7277;7823;9709;9758	2971;4471;4472;7905;8482;8483;10518;10567	2971;4471;7905;8482;10518;10567	107	145
B0YIW2;P02656	B0YIW2;P02656	1;1	1;1	1;1	Apolipoprotein C-III	APOC3	tr|B0YIW2|B0YIW2_HUMAN Apolipoprotein C-III variant 1 OS=Homo sapiens OX=9606 GN=APOC3 PE=1 SV=1;sp|P02656|APOC3_HUMAN Apolipoprotein C-III OS=Homo sapiens OX=9606 GN=APOC3 PE=1 SV=1	2	1	1	1	2020-07-13	2020-07-13	2020-07-13	12815	117	117;99	0	28483	339950000	33995000	2				132	757	True	814	1218;1219	1280;1281	1280
Q9Y282;Q9Y282-3;H0Y5K5;H0Y621;A0A1W2PPS8;Q9Y282-2;H0Y802;H0Y6Z0;A0A0C4DH46	Q9Y282;Q9Y282-3;H0Y5K5;H0Y621;A0A1W2PPS8;Q9Y282-2	8;8;7;6;5;5;2;2;1	8;8;7;6;5;5;2;2;1	8;8;7;6;5;5;2;2;1	Endoplasmic reticulum-Golgi intermediate compartment protein 3	ERGIC3	sp|Q9Y282|ERGI3_HUMAN Endoplasmic reticulum-Golgi intermediate compartment protein 3 OS=Homo sapiens OX=9606 GN=ERGIC3 PE=1 SV=1;sp|Q9Y282-3|ERGI3_HUMAN Isoform 3 of Endoplasmic reticulum-Golgi intermediate compartment protein 3 OS=Homo sapiens OX=9606 GN=	9	8	8	8	24	24	24	43222	383	383;388;397;326;198;230;130;157;123	0	55745	642980000	33841000	10				1125	632;845;4043;4410;5893;5904;5936;6419	True;True;True;True;True;True;True;True	681;903;4291;4738;6299;6310;6344;6858;6859	1033;1341;6531;7255;9572;9573;9586;9627;10421;10422	1087;1409;7085;7882;10378;10379;10392;10434;11281;11282	1087;1409;7085;7882;10379;10392;10434;11281	568;569	1;288
Q9NQG1	Q9NQG1	1	1	1	Protein MANBAL	MANBAL	sp|Q9NQG1|MANBL_HUMAN Protein MANBAL OS=Homo sapiens OX=9606 GN=MANBAL PE=1 SV=1	1	1	1	1	2020-01-14	2020-01-14	2020-01-14	9467	85	85	0	14486	169060000	33811000	2				1054	5148	True	5513	8328;8329	9012;9013	9012
E5RJR5;P63208;E7ERH2;F8W8N3;P63208-2;E5RGM3	E5RJR5;P63208;E7ERH2;F8W8N3;P63208-2;E5RGM3	5;5;4;4;4;3	5;5;4;4;4;3	5;5;4;4;4;3	S-phase kinase-associated protein 1	SKP1	tr|E5RJR5|E5RJR5_HUMAN S-phase kinase-associated protein 1 OS=Homo sapiens OX=9606 GN=SKP1 PE=1 SV=1;sp|P63208|SKP1_HUMAN S-phase kinase-associated protein 1 OS=Homo sapiens OX=9606 GN=SKP1 PE=1 SV=2;tr|E7ERH2|E7ERH2_HUMAN S-phase kinase-associated protein	6	5	5	5	2020-07-30	2020-07-30	2020-07-30	18.72	163	163;163;142;158;160;102	0	44628	467210000	33372000	6				237	791;1496;4997;5726;6095	True;True;True;True;True	848;1604;5349;6120;6512	1268;2493;8119;8120;9309;9843	1334;2693;8800;8801;10090;10654	1334;2693;8801;10090;10654
J3KPS0;Q9NXW2;Q9NXW2-2;V9GYN7;V9GY70	J3KPS0;Q9NXW2;Q9NXW2-2;V9GYN7	10;10;10;5;4	10;10;10;5;4	10;10;10;5;4	DnaJ homolog subfamily B member 12	DNAJB12	tr|J3KPS0|J3KPS0_HUMAN DnaJ (Hsp40) homolog, subfamily B, member 12, isoform CRA_c OS=Homo sapiens OX=9606 GN=DNAJB12 PE=1 SV=1;sp|Q9NXW2|DJB12_HUMAN DnaJ homolog subfamily B member 12 OS=Homo sapiens OX=9606 GN=DNAJB12 PE=1 SV=5;sp|Q9NXW2-2|DJB12_HUMAN Is	5	10	10	10	2020-06-27	2020-06-27	2020-06-27	45489	409	409;375;377;276;172	0	82472	1001000000	33365000	13				374	213;279;325;2401;4295;4464;4620;4635;6620;6795	True;True;True;True;True;True;True;True;True;True	231;303;352;2564;4612;4796;4959;4975;7071;7260	334;432;526;4010;7090;7355;7565;7566;7586;7587;10703;10704;10945	348;450;546;4365;7709;7998;8215;8216;8237;8238;11575;11576;11824	348;450;546;4365;7709;7998;8216;8237;11575;11824
K7EPQ7;Q5BJH7-2;Q5BJH7-6;Q5BJH7-3;Q5BJH7;K7ERY2;Q5BJH7-4;Q5BJH7-5	K7EPQ7;Q5BJH7-2;Q5BJH7-6;Q5BJH7-3;Q5BJH7;K7ERY2;Q5BJH7-4;Q5BJH7-5	2;2;2;2;2;1;1;1	2;2;2;2;2;1;1;1	2;2;2;2;2;1;1;1	Protein YIF1B	YIF1B	tr|K7EPQ7|K7EPQ7_HUMAN Protein YIF1B OS=Homo sapiens OX=9606 GN=YIF1B PE=1 SV=1;sp|Q5BJH7-2|YIF1B_HUMAN Isoform 2 of Protein YIF1B OS=Homo sapiens OX=9606 GN=YIF1B;sp|Q5BJH7-6|YIF1B_HUMAN Isoform 6 of Protein YIF1B OS=Homo sapiens OX=9606 GN=YIF1B;sp|Q5BJH	8	2	2	2	2020-07-11	2020-07-11	2020-07-11	26924	248	248;283;299;311;314;231;291;294	0	14437	266520000	33315000	2				395	2779;6797	True;True	2956;7262	4672;10947	5111;11826	5111;11826
P38646;D6RJI2;A0A3B3ITI4;H0Y8S0;H0YBG6;A0A3B3ITN1;D6RA73	P38646	18;3;3;2;2;1;1	18;3;3;2;2;1;1	18;3;3;2;2;1;1	Stress-70 protein, mitochondrial	HSPA9	sp|P38646|GRP75_HUMAN Stress-70 protein, mitochondrial OS=Homo sapiens OX=9606 GN=HSPA9 PE=1 SV=2	7	18	18	18	33.3	33.3	33.3	73.68	679	679;95;180;102;163;43;62	0	167.77	1692300000	33183000	21				634	494;746;975;1028;1053;1539;1551;1579;3554;4241;4699;5004;5061;5333;5395;5958;6093;6300	True;True;True;True;True;True;True;True;True;True;True;True;True;True;True;True;True;True	531;802;1042;1043;1099;1125;1647;1660;1689;3767;4555;5039;5356;5415;5705;5771;6367;6510;6729	814;1202;1608;1609;1673;1704;2543;2559;2560;2598;2599;5847;6958;7656;8128;8197;8657;8746;9651;9841;10172	850;1264;1710;1711;1776;1810;2744;2761;2762;2808;2809;6371;7551;8308;8809;8879;9368;9464;10458;10652;11008	850;1264;1710;1776;1810;2744;2761;2808;6371;7551;8308;8809;8879;9368;9464;10458;10652;11008	315	303
Q6ZXV5-2;Q6ZXV5;F8VRY4;F8W044;F8VR71	Q6ZXV5-2;Q6ZXV5	16;16;3;2;1	16;16;3;2;1	16;16;3;2;1	Transmembrane and TPR repeat-containing protein 3	TMTC3	sp|Q6ZXV5-2|TMTC3_HUMAN Isoform 2 of Protein O-mannosyl-transferase TMTC3 OS=Homo sapiens OX=9606 GN=TMTC3;sp|Q6ZXV5|TMTC3_HUMAN Protein O-mannosyl-transferase TMTC3 OS=Homo sapiens OX=9606 GN=TMTC3 PE=1 SV=2	5	16	16	16	2020-09-18	2020-09-18	2020-09-18	103.88	914	914;915;406;148;145	0	131.01	1893600000	32648000	18				835	314;676;926;1153;1725;2046;2499;2791;3087;3974;4692;4701;5232;5666;6625;6812	True;True;True;True;True;True;True;True;True;True;True;True;True;True;True;True	340;727;990;1234;1845;2186;2187;2666;2968;3283;4205;5032;5041;5598;6056;7076;7279	479;1091;1490;1835;2787;3236;3237;4199;4686;5136;6406;6407;7648;7658;8442;9230;10709;10986	497;1145;1568;1946;2999;3458;3459;4581;5126;5595;6945;6946;8300;8310;9132;10011;11581;11867	497;1145;1568;1946;2999;3458;4581;5126;5595;6945;8300;8310;9132;10011;11581;11867	430;431;432	504;505;747
A0A0C4DFL7;Q16850;Q16850-2;H7C0D0;C9IYR8;A0A3B3ITR4	A0A0C4DFL7;Q16850;Q16850-2	13;13;11;6;1;1	13;13;11;6;1;1	13;13;11;6;1;1	Lanosterol 14-alpha demethylase	CYP51A1	tr|A0A0C4DFL7|A0A0C4DFL7_HUMAN Lanosterol 14-alpha demethylase OS=Homo sapiens OX=9606 GN=CYP51A1 PE=1 SV=1;sp|Q16850|CP51A_HUMAN Lanosterol 14-alpha demethylase OS=Homo sapiens OX=9606 GN=CYP51A1 PE=1 SV=3;sp|Q16850-2|CP51A_HUMAN Isoform 2 of Lanosterol 1	6	13	13	13	33.8	33.8	33.8	57278	509	509;503;404;222;30;708	0	100.21	1011700000	32636000	15				57	657;938;1669;1702;2646;3151;3896;4255;4469;5310;5574;5650;5815	True;True;True;True;True;True;True;True;True;True;True;True;True	707;1002;1787;1820;2820;3352;4124;4571;4801;5681;5962;6040;6218	1064;1510;2715;2759;4479;4480;5232;6305;6977;7362;8625;9111;9112;9214;9473	1118;1588;2926;2970;4903;4904;5693;6841;7571;8005;9335;9886;9887;9995;10273	1118;1588;2926;2970;4903;5693;6841;7571;8005;9335;9887;9995;10273
P43490;A0A0C4DFS8;C9JF35;C9JG65	P43490;A0A0C4DFS8	15;11;1;1	15;11;1;1	15;11;1;1	Nicotinamide phosphoribosyltransferase	NAMPT	sp|P43490|NAMPT_HUMAN Nicotinamide phosphoribosyltransferase OS=Homo sapiens OX=9606 GN=NAMPT PE=1 SV=1;tr|A0A0C4DFS8|A0A0C4DFS8_HUMAN Nicotinamide phosphoribosyltransferase OS=Homo sapiens OX=9606 GN=NAMPT PE=1 SV=1	4	15	15	15	39.5	39.5	39.5	55.52	491	491;368;60;88	0	144.1	1137800000	32509000	18				641	581;932;1017;1334;2048;2381;3074;3428;4223;5400;5723;6133;6466;6577;6702	True;True;True;True;True;True;True;True;True;True;True;True;True;True;True	627;996;1088;1427;2189;2543;3270;3639;4534;5777;6117;6552;6907;7026;7161	972;1500;1660;2252;2253;3239;3240;3984;5120;5626;5627;6934;8754;9306;9889;10481;10641;10810	1024;1578;1763;2446;2447;3461;3462;4338;4339;5577;6127;6128;7527;9472;10087;10700;11341;11513;11684	1024;1578;1763;2446;3462;4338;5577;6127;7527;9472;10087;10700;11341;11513;11684
Q8N2K0;Q8N2K0-2;Q8N2K0-3;Q5T712;I3L294;I3L1V0;I3L440;I3L380	Q8N2K0;Q8N2K0-2;Q8N2K0-3;Q5T712	12;12;11;6;5;4;2;2	12;12;11;6;5;4;2;2	12;12;11;6;5;4;2;2	Monoacylglycerol lipase ABHD12	ABHD12	sp|Q8N2K0|ABD12_HUMAN Monoacylglycerol lipase ABHD12 OS=Homo sapiens OX=9606 GN=ABHD12 PE=1 SV=2;sp|Q8N2K0-2|ABD12_HUMAN Isoform 2 of Monoacylglycerol lipase ABHD12 OS=Homo sapiens OX=9606 GN=ABHD12;sp|Q8N2K0-3|ABD12_HUMAN Isoform 3 of Monoacylglycerol lip	8	12	12	12	41.5	41.5	41.5	45096	398	398;404;360;187;159;194;105;118	0	112.99	868010000	32149000	13				874	1030;1601;1602;2236;2476;3236;3458;3870;6185;6281;6291;6626	True;True;True;True;True;True;True;True;True;True;True;True	1101;1712;1713;2387;2642;3440;3670;4097;6606;6709;6719;7077	1675;2628;2629;3592;4118;4119;5341;5672;6264;9990;10148;10159;10710	1778;2839;2840;3885;4475;4476;5807;6175;6799;10819;10984;10995;11582	1778;2839;2840;3885;4476;5807;6175;6799;10819;10984;10995;11582
P12236;P12235;V9GYG0;Q9H0C2	P12236;P12235	9;5;4;2	9;5;4;2	5;2;1;0	ADP/ATP translocase 3;ADP/ATP translocase 3, N-terminally processed;ADP/ATP translocase 1	SLC25A6;SLC25A4	sp|P12236|ADT3_HUMAN ADP/ATP translocase 3 OS=Homo sapiens OX=9606 GN=SLC25A6 PE=1 SV=4;sp|P12235|ADT1_HUMAN ADP/ATP translocase 1 OS=Homo sapiens OX=9606 GN=SLC25A4 PE=1 SV=4	4	9	9	5	2020-05-31	2020-05-31	2020-05-18	32866	298	298;298;208;315	0	60.04	801630000	32065000	7				555	86;817;1528;2010;2242;2697;3576;5550;6627	True;True;True;True;True;True;True;True;True	93;874;1636;2148;2394;2872;3789;5935;7078	159;1306;2530;3193;3604;4546;5877;8995;10711	164;1374;2731;3415;3902;4972;6401;9731;11583	164;1374;2731;3415;3902;4972;6401;9731;11583
P37287;P37287-3;P37287-2;B3KUV7;A0A0U1RQM9;A0A0U1RQW8;A0A1B0GU19;A8K382;A0A1B0GVE5;A0A0U1RQF5;A0A0U1RRE8	P37287;P37287-3;P37287-2	13;8;8;5;4;4;4;3;1;1;1	13;8;8;5;4;4;4;3;1;1;1	13;8;8;5;4;4;4;3;1;1;1	Phosphatidylinositol N-acetylglucosaminyltransferase subunit A	PIGA	sp|P37287|PIGA_HUMAN Phosphatidylinositol N-acetylglucosaminyltransferase subunit A OS=Homo sapiens OX=9606 GN=PIGA PE=1 SV=1;sp|P37287-3|PIGA_HUMAN Isoform 3 of Phosphatidylinositol N-acetylglucosaminyltransferase subunit A OS=Homo sapiens OX=9606 GN=PIGA	11	13	13	13	34.1	34.1	34.1	54126	484	484;250;315;169;150;152;274;118;44;51;99	0	101.76	948550000	31618000	14				632	469;2036;2157;2759;5141;5577;6024;6088;6224;6338;6359;6737;6760	True;True;True;True;True;True;True;True;True;True;True;True;True	506;2176;2302;2934;5506;5965;6436;6504;6648;6769;6790;7200;7224	783;3226;3423;4633;8319;8320;9115;9738;9830;9831;10064;10279;10305;10853;10893	819;3448;3683;5071;9003;9004;9890;10547;10641;10642;10898;11126;11153;11728;11770	819;3448;3683;5071;9004;9890;10547;10641;10898;11126;11153;11728;11770
P05386	P05386	2	2	2	60S acidic ribosomal protein P1	RPLP1	sp|P05386|RLA1_HUMAN 60S acidic ribosomal protein P1 OS=Homo sapiens OX=9606 GN=RPLP1 PE=1 SV=1	1	2	2	2	36.8	36.8	36.8	11514	114	114	0	20735	126470000	31617000	3				532	37;509	True;True	41;546	96;831;832	101;867;868	101;867
P25705;P25705-2;P25705-3;K7EK77;K7ERX7;K7EJP1;K7EQH4;K7ENJ4;REV__C9JEW7;REV__C9JRT6;REV__A0A3B3ITR4;REV__O00522-3;REV__H3BM74;REV__H3BM14;REV__Q9Y5A7;REV__Q9Y5A7-2;REV__F8WDB6;REV__A0A0C4DG23;REV__C9JBN7;REV__C9JD81;REV__O00522;REV__C9J3W7;REV__C9JF32;REV__C9J718;REV__C9J7X7;REV__F8WDL9;REV__C9JJM9	P25705;P25705-2;P25705-3;K7EK77;K7ERX7	12;12;10;7;6;5;4;4;1;1;1;1;1;1;1;1;1;1;1;1;1;1;1;1;1;1;1	12;12;10;7;6;5;4;4;1;1;1;1;1;1;1;1;1;1;1;1;1;1;1;1;1;1;1	12;12;10;7;6;5;4;4;1;1;1;1;1;1;1;1;1;1;1;1;1;1;1;1;1;1;1	ATP synthase subunit alpha, mitochondrial	ATP5A1	sp|P25705|ATPA_HUMAN ATP synthase subunit alpha, mitochondrial OS=Homo sapiens OX=9606 GN=ATP5F1A PE=1 SV=1;sp|P25705-2|ATPA_HUMAN Isoform 2 of ATP synthase subunit alpha, mitochondrial OS=Homo sapiens OX=9606 GN=ATP5F1A;sp|P25705-3|ATPA_HUMAN Isoform 3 of	27	12	12	12	2020-02-26	2020-02-26	2020-02-26	59.75	553	553;503;531;207;205;144;111;199;112;254;708;688;639;625;615;601;267;243;97;65;736;69;184;162;154;149;58	0	102.31	1249900000	31248000	12				597	418;560;1193;1753;2233;2407;3859;4848;5578;5770;6183;6389	True;True;True;True;True;True;True;True;True;True;True;True	453;603;1276;1876;2384;2570;4085;5192;5966;6167;6604;6822	694;905;1886;2824;2825;3589;4018;6251;7900;9116;9371;9988;10342	724;943;2000;3036;3037;3882;4373;6786;8576;9891;10162;10817;11191	724;943;2000;3037;3882;4373;6786;8576;9891;10162;10817;11191	287	324
Q99442;F8WF48;F8WCJ7	Q99442;F8WF48;F8WCJ7	10;7;7	10;7;7	10;7;7	Translocation protein SEC62	SEC62	sp|Q99442|SEC62_HUMAN Translocation protein SEC62 OS=Homo sapiens OX=9606 GN=SEC62 PE=1 SV=1;tr|F8WF48|F8WF48_HUMAN Translocation protein SEC62 OS=Homo sapiens OX=9606 GN=SEC62 PE=1 SV=1;tr|F8WCJ7|F8WCJ7_HUMAN Translocation protein SEC62 OS=Homo sapiens OX	3	10	10	10	2020-08-18	2020-08-18	2020-08-18	45861	399	399;85;101	0	59579	745410000	31059000	11				984	557;1271;1887;2068;3059;3077;4976;5397;5953;6034	True;True;True;True;True;True;True;True;True;True	600;1362;2020;2209;3254;3273;5326;5774;6362;6447	902;2050;2999;3271;5101;5123;8090;8750;8751;9646;9752	940;2188;3213;3496;5558;5580;8771;9468;9469;10453;10561	940;2188;3213;3496;5558;5580;8771;9469;10453;10561
H7C1N3;O15155;A0A3B3IU16;C9JTT8;Q68DU7;O15155-2	H7C1N3;O15155;A0A3B3IU16;C9JTT8;Q68DU7;O15155-2	2;2;1;1;1;1	2;2;1;1;1;1	2;2;1;1;1;1	BET1 homolog	BET1;DKFZp781C0425	tr|H7C1N3|H7C1N3_HUMAN BET1 homolog (Fragment) OS=Homo sapiens OX=9606 GN=BET1 PE=1 SV=1;sp|O15155|BET1_HUMAN BET1 homolog OS=Homo sapiens OX=9606 GN=BET1 PE=1 SV=1;tr|A0A3B3IU16|A0A3B3IU16_HUMAN BET1 homolog OS=Homo sapiens OX=9606 GN=BET1 PE=1 SV=1;tr|C9	6	2	2	2	2020-08-21	2020-08-21	2020-08-21	14872	133	133;118;85;98;127;83	0	19959	184450000	30742000	2				358	3508;5246	True;True	3721;5612	5732;8547	6235;9257	6235;9257
A0A0A0MQS5;Q9Y284	A0A0A0MQS5;Q9Y284	1;1	1;1	1;1	Protein Asterix	WDR83OS	tr|A0A0A0MQS5|A0A0A0MQS5_HUMAN PTD008 protein, isoform CRA_b OS=Homo sapiens OX=9606 GN=WDR83OS PE=1 SV=1;sp|Q9Y284|ASTER_HUMAN Protein Asterix OS=Homo sapiens OX=9606 GN=WDR83OS PE=1 SV=1	2	1	1	1	2020-07-08	2020-07-08	2020-07-08	11827	104	104;106	1	-2	122630000	30656000	1	+			39	5398	True	5775	8752	9470	9470	14	6
Q8N2G8-3;Q8N2G8;K7ESN3;Q8N2G8-2;K7EQ41;K7EL54;K7EJT7	Q8N2G8-3;Q8N2G8;K7ESN3;Q8N2G8-2	13;13;10;9;3;3;2	13;13;10;9;3;3;2	13;13;10;9;3;3;2	GH3 domain-containing protein	GHDC	sp|Q8N2G8-3|GHDC_HUMAN Isoform 3 of GH3 domain-containing protein OS=Homo sapiens OX=9606 GN=GHDC;sp|Q8N2G8|GHDC_HUMAN GH3 domain-containing protein OS=Homo sapiens OX=9606 GN=GHDC PE=1 SV=2;tr|K7ESN3|K7ESN3_HUMAN GH3 domain-containing protein OS=Homo sapi	7	13	13	13	32.8	32.8	32.8	53518	491	491;530;479;474;130;146;112	0	107.06	972880000	30402000	14				873	337;1174;1988;2067;2482;3252;3270;3311;3519;3851;4303;4589;6396	True;True;True;True;True;True;True;True;True;True;True;True;True	364;1256;2126;2208;2648;3456;3474;3517;3732;4077;4622;4928;6829	542;1864;3168;3270;4127;5358;5359;5377;5448;5743;6243;7102;7530;10350	562;1976;3390;3495;4484;5824;5825;5843;5932;6246;6778;7722;8180;11200	562;1976;3390;3495;4484;5825;5843;5932;6246;6778;7722;8180;11200
Q86Y56;Q86Y56-2;H0Y650;E9PGY2;Q86Y56-3;H7C3B1	Q86Y56;Q86Y56-2;H0Y650	20;17;13;7;6;3	20;17;13;7;6;3	20;17;13;7;6;3	Dynein assembly factor 5, axonemal	DNAAF5	sp|Q86Y56|DAAF5_HUMAN Dynein assembly factor 5, axonemal OS=Homo sapiens OX=9606 GN=DNAAF5 PE=1 SV=4;sp|Q86Y56-2|DAAF5_HUMAN Isoform 2 of Dynein assembly factor 5, axonemal OS=Homo sapiens OX=9606 GN=DNAAF5;tr|H0Y650|H0Y650_HUMAN Dynein assembly factor 5,	6	20	20	20	2020-09-29	2020-09-29	2020-09-29	93.52	855	855;843;657;280;235;195	0	161.19	1536100000	29540000	24				859	95;276;300;683;706;886;1325;1581;2470;2824;3173;3190;3242;3485;3588;3589;3997;5010;5025;5414	True;True;True;True;True;True;True;True;True;True;True;True;True;True;True;True;True;True;True;True	102;103;300;325;734;759;946;1417;1691;2636;3004;3374;3391;3446;3697;3801;3802;4230;5362;5377;5791	168;169;429;463;464;1099;1139;1412;2240;2601;4108;4729;4730;5255;5284;5347;5701;5889;5890;6459;8135;8154;8155;8770	173;174;447;481;482;1153;1196;1488;2434;2811;4465;5169;5170;5718;5748;5813;6204;6413;6414;7012;8816;8835;8836;9488	174;447;481;1153;1196;1488;2434;2811;4465;5170;5718;5748;5813;6204;6413;6414;7012;8816;8835;9488	439	621
O14967;O14967-2;D6RAZ4	O14967;O14967-2	15;8;6	14;8;6	14;8;6	Calmegin	CLGN	sp|O14967|CLGN_HUMAN Calmegin OS=Homo sapiens OX=9606 GN=CLGN PE=1 SV=1;sp|O14967-2|CLGN_HUMAN Isoform 2 of Calmegin OS=Homo sapiens OX=9606 GN=CLGN	3	15	14	14	2020-07-26	2020-07-25	2020-07-25	70038	610	610;405;179	0	101.59	1207100000	29442000	15				435	1148;1495;1610;2457;2880;3114;3122;3175;3432;3506;4497;4523;4852;5524;5741	True;True;True;True;True;True;True;True;False;True;True;True;True;True;True	1229;1603;1722;2623;3065;3311;3319;3376;3644;3719;4832;4858;5197;5907;6136	1829;2492;2639;4089;4090;4804;5176;5185;5257;5636;5730;7414;7447;7911;8965;9329	1939;2692;2850;4445;4446;5248;5637;5646;5720;6138;6233;8059;8097;8587;9700;10110	1939;2692;2850;4445;5248;5637;5646;5720;6138;6233;8059;8097;8587;9700;10110
Q9P032;REV__Q8WXD0;REV__Q8WXD0-2	Q9P032	6;1;1	6;1;1	6;1;1	NADH dehydrogenase [ubiquinone] 1 alpha subcomplex assembly factor 4	NDUFAF4	sp|Q9P032|NDUF4_HUMAN NADH dehydrogenase [ubiquinone] 1 alpha subcomplex assembly factor 4 OS=Homo sapiens OX=9606 GN=NDUFAF4 PE=1 SV=1	3	6	6	6	31.4	31.4	31.4	20266	175	175;754;730	0	43094	470150000	29385000	6				1089	28;1018;2855;2949;3619;4279	True;True;True;True;True;True	29;1089;3039;3137;3834;4595	30;1661;4775;4895;5930;7030	30;1764;5218;5340;6454;7631	30;1764;5218;5340;6454;7631
Q6NXE6-2;Q6NXE6;B4E1N1;F5GWV0;F5H4P3;H0YH65;F5H052;F5H2X2;F5H2K4;F5H3X1;H0YGL0;F5GZP0;H0YGQ5;F5H6J3;F5H7V0	Q6NXE6-2;Q6NXE6;B4E1N1;F5GWV0;F5H4P3	14;14;10;7;7;5;4;4;4;3;3;2;2;2;1	14;14;10;7;7;5;4;4;4;3;3;2;2;2;1	14;14;10;7;7;5;4;4;4;3;3;2;2;2;1	Armadillo repeat-containing protein 6	ARMC6	sp|Q6NXE6-2|ARMC6_HUMAN Isoform 2 of Armadillo repeat-containing protein 6 OS=Homo sapiens OX=9606 GN=ARMC6;sp|Q6NXE6|ARMC6_HUMAN Armadillo repeat-containing protein 6 OS=Homo sapiens OX=9606 GN=ARMC6 PE=1 SV=2;tr|B4E1N1|B4E1N1_HUMAN cDNA FLJ50945, highly	15	14	14	14	42.9	42.9	42.9	51547	476	476;501;408;256;259;145;103;161;163;70;81;43;137;156;30	0	137.03	990340000	29128000	14				820	178;237;920;1037;1147;1190;1485;2625;2775;4108;4377;4559;4918;6306	True;True;True;True;True;True;True;True;True;True;True;True;True;True	195;258;982;1108;1228;1273;1593;2799;2951;4375;4376;4699;4895;5265;6735	290;365;1457;1458;1685;1828;1883;2482;4455;4659;6639;6640;7209;7489;7992;10178	304;379;1533;1534;1791;1938;1997;2682;4876;5098;7195;7196;7833;8139;8670;11014	304;379;1533;1791;1938;1997;2682;4876;5098;7195;7833;8139;8670;11014	427;428	24;243
Q13637;P57729;H0YDB7	Q13637	7;2;1	7;2;1	6;1;1	Ras-related protein Rab-32	RAB32	sp|Q13637|RAB32_HUMAN Ras-related protein Rab-32 OS=Homo sapiens OX=9606 GN=RAB32 PE=1 SV=3	3	7	7	6	37.8	37.8	32.9	24997	225	225;211;210	0	46711	575240000	28762000	7				756	1066;1335;1790;2846;3265;3762;6050	True;True;True;True;True;True;True	1138;1428;1916;3026;3469;3984;6465	1720;2254;2872;4761;5372;6118;9778	1826;2448;3084;5204;5838;6644;10587	1826;2448;3084;5204;5838;6644;10587
P38606;P38606-2;C9JVW8;C9JA17	P38606;P38606-2	18;17;4;3	18;17;4;3	18;17;4;3	V-type proton ATPase catalytic subunit A	ATP6V1A	sp|P38606|VATA_HUMAN V-type proton ATPase catalytic subunit A OS=Homo sapiens OX=9606 GN=ATP6V1A PE=1 SV=2;sp|P38606-2|VATA_HUMAN Isoform 2 of V-type proton ATPase catalytic subunit A OS=Homo sapiens OX=9606 GN=ATP6V1A	4	18	18	18	39.1	39.1	39.1	68303	617	617;584;221;184	0	186.8	1259600000	28628000	21				633	306;485;673;782;1369;1575;1958;2372;2435;2986;3163;3207;3695;4592;5073;5484;5829;6475	True;True;True;True;True;True;True;True;True;True;True;True;True;True;True;True;True;True	332;522;724;839;1462;1685;2094;2533;2599;3174;3364;3408;3916;4931;5430;5865;6232;6916	471;803;1087;1251;2300;2301;2594;3124;3956;4054;4947;5244;5304;6033;6034;7534;7535;8215;8897;9491;10492	489;839;1141;1315;2494;2495;2804;3345;4308;4410;5392;5705;5770;6558;6559;8184;8185;8897;9623;10293;11352	489;839;1141;1315;2494;2804;3345;4308;4410;5392;5705;5770;6559;8184;8897;9623;10293;11352
O95674	O95674	3	3	3	Phosphatidate cytidylyltransferase 2	CDS2	sp|O95674|CDS2_HUMAN Phosphatidate cytidylyltransferase 2 OS=Homo sapiens OX=9606 GN=CDS2 PE=1 SV=1	1	3	3	3	2020-07-09	2020-07-09	2020-07-09	51417	445	445	0	31841	651760000	28337000	4				507	158;5896;5935	True;True;True	172;6302;6343	265;9576;9577;9626	279;10382;10383;10433	279;10383;10433
Q9BT78;D6RAX7;D6RFN0;Q9BT78-2;D6RD63;D6REK7	Q9BT78;D6RAX7;D6RFN0;Q9BT78-2;D6RD63	14;13;13;12;11;1	14;13;13;12;11;1	14;13;13;12;11;1	COP9 signalosome complex subunit 4	COPS4	sp|Q9BT78|CSN4_HUMAN COP9 signalosome complex subunit 4 OS=Homo sapiens OX=9606 GN=COPS4 PE=1 SV=1;tr|D6RAX7|D6RAX7_HUMAN COP9 constitutive photomorphogenic-like protein subunit 4 isoform 2 OS=Homo sapiens OX=9606 GN=COPS4 PE=1 SV=1;tr|D6RFN0|D6RFN0_HUMAN	6	14	14	14	37.4	37.4	37.4	46268	406	406;420;438;352;275;51	0	103.19	990050000	28287000	18				1004	490;539;570;697;1384;2628;4111;4145;4713;4773;5648;5649;6097;6729	True;True;True;True;True;True;True;True;True;True;True;True;True;True	527;580;614;749;1478;2802;4381;4435;5053;5116;6038;6039;6514;7191	810;877;956;957;1119;2320;4458;6647;6806;7671;7672;7755;7756;9211;9212;9213;9845;10842	846;915;1008;1009;1174;2514;4879;7203;7391;8323;8324;8409;8410;9992;9993;9994;10656;11717	846;915;1008;1174;2514;4879;7203;7391;8323;8409;9992;9994;10656;11717	498	342
Q92598-2;Q92598-3;Q92598;Q92598-4;A0A0A0MSM0;Q5TBM3;R4GN69	Q92598-2;Q92598-3;Q92598;Q92598-4;A0A0A0MSM0	15;15;15;15;12;3;1	13;13;13;13;10;3;1	13;13;13;13;10;3;1	Heat shock protein 105 kDa	HSPH1	sp|Q92598-2|HS105_HUMAN Isoform Beta of Heat shock protein 105 kDa OS=Homo sapiens OX=9606 GN=HSPH1;sp|Q92598-3|HS105_HUMAN Isoform 3 of Heat shock protein 105 kDa OS=Homo sapiens OX=9606 GN=HSPH1;sp|Q92598|HS105_HUMAN Heat shock protein 105 kDa OS=Homo sa	7	15	13	13	2020-05-21	2020-08-18	2020-08-18	92115	814	814;817;858;860;782;115;115	0	158.48	1665800000	28234000	17				931	1430;1913;2037;2685;3132;3231;3907;4293;4429;4716;5196;5424;6145;6414;6732	True;True;False;True;True;True;True;False;True;True;True;True;True;True;True	1526;2046;2177;2860;3330;3435;4136;4610;4758;5056;5562;5802;6564;6850;7194;7195	2381;3037;3038;3227;4533;5202;5334;6320;7088;7283;7284;7675;8399;8784;9904;10384;10846;10847;10848	2577;3253;3254;3449;4959;5663;5800;6857;7707;7911;7912;8327;9088;9502;10716;11235;11721;11722;11723	2577;3253;3449;4959;5663;5800;6857;7707;7912;8327;9088;9502;10716;11235;11722	465	704
CON__P02662	CON__P02662	3	3	3				1	3	3	3	2020-06-16	2020-06-16	2020-06-16	22975	199	199	0	19846	333790000	27816000	4			+	191	1387;2544;6696	True;True;True	1481;2712;7155	2323;4255;4256;10804	2517;4640;4641;11678	2517;4641;11678
Q8NE18	Q8NE18	1	1	1	Putative methyltransferase NSUN7	NSUN7	sp|Q8NE18|NSUN7_HUMAN Putative methyltransferase NSUN7 OS=Homo sapiens OX=9606 GN=NSUN7 PE=2 SV=4	1	1	1	1	2020-04-01	2020-04-01	2020-04-01	81039	718	718	0.00096618	64107	1301900000	27700000	2				901	2208	True	2356	3534;3535	3814;3815	3814
C9IYK6;C9JTE9;Q9UHQ4;Q9UHQ4-2;C9JGJ9;F8WB99;H7C5E2;C9JP06;F8WDG1;B7Z2L0;H0Y7N8	C9IYK6;C9JTE9;Q9UHQ4;Q9UHQ4-2;C9JGJ9;F8WB99;H7C5E2	4;4;4;4;3;3;3;1;1;1;1	4;4;4;4;3;3;3;1;1;1;1	4;4;4;4;3;3;3;1;1;1;1	B-cell receptor-associated protein 29	BCAP29	tr|C9IYK6|C9IYK6_HUMAN B-cell receptor-associated protein 29 (Fragment) OS=Homo sapiens OX=9606 GN=BCAP29 PE=1 SV=1;tr|C9JTE9|C9JTE9_HUMAN B-cell receptor-associated protein 29 (Fragment) OS=Homo sapiens OX=9606 GN=BCAP29 PE=1 SV=1;sp|Q9UHQ4|BAP29_HUMAN B-	11	4	4	4	2020-05-24	2020-05-24	2020-05-24	22933	196	196;230;241;348;133;171;294;64;66;147;163	0	25807	359790000	27676000	4				159	2699;5149;5374;6780	True;True;True;True	2874;5514;5748;7245	4548;8330;8719;10922	4974;9014;9437;11800	4974;9014;9437;11800
B7Z645;O60506-5;O60506-4;O60506-3;O60506-2;O60506	B7Z645;O60506-5;O60506-4;O60506-3;O60506-2;O60506	1;1;1;1;1;1	1;1;1;1;1;1	1;1;1;1;1;1	Heterogeneous nuclear ribonucleoprotein Q	SYNCRIP	tr|B7Z645|B7Z645_HUMAN Synaptotagmin binding, cytoplasmic RNA interacting protein, isoform CRA_b OS=Homo sapiens OX=9606 GN=SYNCRIP PE=1 SV=1;sp|O60506-5|HNRPQ_HUMAN Isoform 5 of Heterogeneous nuclear ribonucleoprotein Q OS=Homo sapiens OX=9606 GN=SYNCRIP;	6	1	1	1	2020-04-02	2020-04-02	2020-04-02	52046	464	464;410;527;562;588;623	1	-2	991290000	27536000	2	+			154	3655	True	3874	5979;5980	6503;6504	6503	53;54	96;97
Q58FF8	Q58FF8	8	1	1	Putative heat shock protein HSP 90-beta 2	HSP90AB2P	sp|Q58FF8|H90B2_HUMAN Putative heat shock protein HSP 90-beta 2 OS=Homo sapiens OX=9606 GN=HSP90AB2P PE=1 SV=2	1	8	1	1	2020-09-18	2020-09-03	2020-09-03	44348	381	381	0	16284	845980000	27290000	2				794	121;287;2560;2670;2935;4564;5179;6606	False;False;True;False;False;False;False;False	133;312;2730;2845;3123;4902;5545;7056	221;445;4278;4279;4515;4872;4873;7498;8374;10682	235;463;4663;4664;4941;5317;5318;8148;9062;11554	235;463;4663;4941;5317;8148;9062;11554
Q8TEB9;C9K011;C9JQK8;C9J1R4;B9A054;Q8TEB9-2	Q8TEB9;C9K011	4;2;1;1;1;1	4;2;1;1;1;1	4;2;1;1;1;1	Rhomboid-related protein 4	RHBDD1	sp|Q8TEB9|RHBL4_HUMAN Rhomboid-related protein 4 OS=Homo sapiens OX=9606 GN=RHBDD1 PE=1 SV=1;tr|C9K011|C9K011_HUMAN Rhomboid-related protein 4 (Fragment) OS=Homo sapiens OX=9606 GN=RHBDD1 PE=1 SV=1	6	4	4	4	2020-07-18	2020-07-18	2020-07-18	35823	315	315;151;124;134;157;106	0	38275	326450000	27204000	4				913	2849;4446;4599;5034	True;True;True;True	3030;4778;4938;5386	4766;7334;7543;8165	5209;7976;8193;8846	5209;7976;8193;8846
A0A087WZ62;Q9H6U8;Q9H6U8-3;Q9H6U8-2;Q9H6U8-4;H0YCW6;A0A087WVC0;A0A087WZY8;A0A087WTZ3;A0A087WX16;A0A087WV58	A0A087WZ62;Q9H6U8;Q9H6U8-3;Q9H6U8-2;Q9H6U8-4;H0YCW6	12;12;12;8;8;7;4;4;3;2;2	12;12;12;8;8;7;4;4;3;2;2	12;12;12;8;8;7;4;4;3;2;2	Alpha-1,2-mannosyltransferase ALG9	ALG9	tr|A0A087WZ62|A0A087WZ62_HUMAN Mannosyltransferase OS=Homo sapiens OX=9606 PE=3 SV=1;sp|Q9H6U8|ALG9_HUMAN Alpha-1,2-mannosyltransferase ALG9 OS=Homo sapiens OX=9606 GN=ALG9 PE=1 SV=2;sp|Q9H6U8-3|ALG9_HUMAN Isoform 3 of Alpha-1,2-mannosyltransferase ALG9 OS	11	12	12	12	2020-07-16	2020-07-16	2020-07-16	95921	844	844;611;618;440;447;207;168;198;134;102;144	0	108.55	1235100000	26851000	13				27	228;727;1274;1422;1909;2296;2630;2631;3011;4654;5411;5451	True;True;True;True;True;True;True;True;True;True;True;True	247;783;1365;1517;2042;2452;2804;2805;3201;3202;4994;5788;5830	351;1177;2055;2056;2367;3033;3759;4460;4461;4462;4983;4984;7607;8767;8825	365;1236;2193;2194;2563;3249;4082;4881;4882;4883;5428;5429;8258;9485;9547	365;1236;2194;2563;3249;4082;4881;4882;5428;8258;9485;9547	11	749
Q9UNM6;A0A087WUL9;Q9UNM6-2;J3KNQ3;E9PL38;H0YD73;E9PQG3;E9PPD2	Q9UNM6;A0A087WUL9;Q9UNM6-2;J3KNQ3;E9PL38	9;8;8;7;5;4;2;1	9;8;8;7;5;4;2;1	9;8;8;7;5;4;2;1	26S proteasome non-ATPase regulatory subunit 13	PSMD13	sp|Q9UNM6|PSD13_HUMAN 26S proteasome non-ATPase regulatory subunit 13 OS=Homo sapiens OX=9606 GN=PSMD13 PE=1 SV=2;tr|A0A087WUL9|A0A087WUL9_HUMAN 26S proteasome non-ATPase regulatory subunit 13 OS=Homo sapiens OX=9606 GN=PSMD13 PE=1 SV=1;sp|Q9UNM6-2|PSD13_H	8	9	9	9	29	29	29	42945	376	376;377;378;349;263;221;113;70	0	76.77	725620000	25915000	12				1117	1046;2985;3674;3980;4840;5506;6052;6245;6813	True;True;True;True;True;True;True;True;True	1118;3173;3895;4211;5184;5889;6467;6671;7280	1697;4946;6006;6414;7892;8937;9781;10094;10095;10987;10988	1803;5391;6531;6953;8568;9667;10590;10928;10929;11868;11869;11870	1803;5391;6531;6953;8568;9667;10590;10929;11870
P28288;P28288-2;P28288-3;A0A3B3ITW3	P28288;P28288-2	14;11;3;1	14;11;3;1	14;11;3;1	ATP-binding cassette sub-family D member 3	ABCD3	sp|P28288|ABCD3_HUMAN ATP-binding cassette sub-family D member 3 OS=Homo sapiens OX=9606 GN=ABCD3 PE=1 SV=1;sp|P28288-2|ABCD3_HUMAN Isoform 2 of ATP-binding cassette sub-family D member 3 OS=Homo sapiens OX=9606 GN=ABCD3	4	14	14	14	2020-06-27	2020-06-27	2020-06-27	75475	659	659;549;236;167	0	122.31	1367600000	25326000	17				606	1040;1041;1307;1671;1719;2160;2458;2624;3908;4183;4901;5131;6142;6703	True;True;True;True;True;True;True;True;True;True;True;True;True;True	1111;1112;1399;1789;1838;2305;2624;2798;4137;4484;5246;5495;6561;7162	1688;1689;2219;2717;2780;3426;3427;4091;4454;6321;6322;6860;7969;8300;8301;9900;10811	1794;1795;2411;2928;2992;3686;3687;4447;4875;6858;6859;7446;8646;8982;8983;10712;11685	1794;1795;2411;2928;2992;3687;4447;4875;6859;7446;8646;8982;10712;11685
P31947-2;P31947	P31947-2;P31947	4;4	1;1	1;1	14-3-3 protein sigma	SFN	sp|P31947-2|1433S_HUMAN Isoform 2 of 14-3-3 protein sigma OS=Homo sapiens OX=9606 GN=SFN;sp|P31947|1433S_HUMAN 14-3-3 protein sigma OS=Homo sapiens OX=9606 GN=SFN PE=1 SV=1	2	4	1	1	2020-03-15	2020-07-03	2020-07-03	24336	216	216;248	1	-2	506070000	25303000	1	+			621	1067;3164;4362;6184	False;False;False;True	1139;1140;3365;4683;6605	1721;1722;1723;5245;7192;9989	1827;1828;1829;5706;5707;7816;10818	1827;5707;7816;10818	288	188
E9PI08;Q9Y256;E9PKA7;E9PPV9	E9PI08;Q9Y256;E9PKA7	5;5;3;1	5;5;3;1	5;5;3;1	CAAX prenyl protease 2	RCE1	tr|E9PI08|E9PI08_HUMAN CAAX prenyl protease 2 OS=Homo sapiens OX=9606 GN=RCE1 PE=1 SV=1;sp|Q9Y256|FACE2_HUMAN CAAX prenyl protease 2 OS=Homo sapiens OX=9606 GN=RCE1 PE=1 SV=1;tr|E9PKA7|E9PKA7_HUMAN CAAX prenyl protease 2 OS=Homo sapiens OX=9606 GN=RCE1 PE=	4	5	5	5	2020-08-18	2020-08-18	2020-08-18	33429	308	308;329;206;102	0	37583	302390000	25199000	5				257	868;1450;3984;4434;6402	True;True;True;True;True	928;1547;4216;4764;6835	1368;2408;6423;7290;10356	1437;2605;6963;7918;11206	1437;2605;6963;7918;11206
O75348;F2Z307;O95670-2;O95670	O75348	3;1;1;1	3;1;1;1	3;1;1;1	V-type proton ATPase subunit G 1	ATP6V1G1	sp|O75348|VATG1_HUMAN V-type proton ATPase subunit G 1 OS=Homo sapiens OX=9606 GN=ATP6V1G1 PE=1 SV=3	4	3	3	3	2020-08-28	2020-08-28	2020-08-28	13757	118	118;99;78;118	0	35794	225670000	25075000	3				478	498;1137;1232	True;True;True	535;1217;1318	819;1817;1936	855;1927;2052	855;1927;2052
CON__P08779;P08779;CON__Q9Z2K1;CON__Q3ZAW8;K7ENW6	CON__P08779;P08779	19;19;7;7;6	11;11;2;2;5	9;9;2;2;4	Keratin, type I cytoskeletal 16	KRT16	;sp|P08779|K1C16_HUMAN Keratin, type I cytoskeletal 16 OS=Homo sapiens OX=9606 GN=KRT16 PE=1 SV=4	5	19	11	9	44.4	2020-01-28	2020-03-24	51267	473	473;473;469;474;162	0	119.93	866320000	24752000	13			+	197	311;489;741;1042;1256;1611;1627;2738;3150;3213;3528;4298;4752;4900;5525;5654;5760;6121;6368	False;False;True;True;True;True;True;True;False;False;True;True;False;True;True;True;False;False;False	337;526;797;1113;1344;1723;1741;2913;3351;3414;3741;4616;5094;5245;5908;6044;6156;6540;6800;6801	476;809;1194;1690;1967;2640;2660;4594;4595;5230;5231;5310;5311;5806;7095;7730;7968;8966;9218;9352;9875;10317;10318	494;845;1254;1796;2087;2851;2871;5020;5021;5022;5691;5692;5776;5777;6328;7715;8383;8645;9701;9999;10133;10686;11165;11166	494;845;1254;1796;2087;2851;2871;5021;5692;5777;6328;7715;8383;8645;9701;9999;10133;10686;11165	76;77	121;296
Q8N2U9;Q8N2U9-2;K7ERV4;Q8N2U9-3;K7EMG2	Q8N2U9;Q8N2U9-2;K7ERV4	5;4;3;2;1	5;4;3;2;1	5;4;3;2;1	PQ-loop repeat-containing protein 1	PQLC1	sp|Q8N2U9|PQLC1_HUMAN PQ-loop repeat-containing protein 1 OS=Homo sapiens OX=9606 GN=PQLC1 PE=1 SV=1;sp|Q8N2U9-2|PQLC1_HUMAN Isoform 2 of PQ-loop repeat-containing protein 1 OS=Homo sapiens OX=9606 GN=PQLC1;tr|K7ERV4|K7ERV4_HUMAN PQ-loop repeat-containing	5	5	5	5	2020-02-19	2020-02-19	2020-02-19	30477	271	271;253;132;132;136	0	44121	296820000	24735000	5				875	2797;4210;4502;5118;5903	True;True;True;True;True	2974;4516;4837;5481;6309	4694;6901;7419;7420;8279;9585	5134;7487;8064;8065;8961;10391	5134;7487;8064;8961;10391
K7ELH8;Q6ZPD9;Q6ZPD9-2;K7ELB5;S4R3D3;Q8N6Q4;K7ELG1	K7ELH8;Q6ZPD9;Q6ZPD9-2;K7ELB5	8;8;6;4;2;1;1	8;8;6;4;2;1;1	8;8;6;4;2;1;1	Probable C-mannosyltransferase DPY19L3	DPY19L3	tr|K7ELH8|K7ELH8_HUMAN Probable C-mannosyltransferase DPY19L3 OS=Homo sapiens OX=9606 GN=DPY19L3 PE=1 SV=1;sp|Q6ZPD9|D19L3_HUMAN Probable C-mannosyltransferase DPY19L3 OS=Homo sapiens OX=9606 GN=DPY19L3 PE=2 SV=1;sp|Q6ZPD9-2|D19L3_HUMAN Isoform 2 of Probab	7	8	8	8	2020-08-13	2020-08-13	2020-08-13	79509	688	688;716;542;309;134;102;126	0	78073	904410000	24443000	10				390	523;604;1785;2344;5055;5422;5635;5696	True;True;True;True;True;True;True;True	561;652;1910;2503;5408;5800;6025;6088	850;999;2866;3921;8188;8782;9196;9271;9272;9273	886;1052;3078;4271;8869;9500;9977;10052;10053;10054	886;1052;3078;4271;8869;9500;9977;10053
Q14318-2;Q14318;U3KQ64;A0A0A0MTJ1;M0R2K9;Q14318-3;U3KQI1;M0R2Q6;M0R1Q0;M0R1S6	Q14318-2;Q14318;U3KQ64;A0A0A0MTJ1;M0R2K9;Q14318-3	8;7;4;4;4;4;2;2;1;1	8;7;4;4;4;4;2;2;1;1	8;7;4;4;4;4;2;2;1;1	Peptidyl-prolyl cis-trans isomerase FKBP8;Peptidyl-prolyl cis-trans isomerase	FKBP8	sp|Q14318-2|FKBP8_HUMAN Isoform 2 of Peptidyl-prolyl cis-trans isomerase FKBP8 OS=Homo sapiens OX=9606 GN=FKBP8;sp|Q14318|FKBP8_HUMAN Peptidyl-prolyl cis-trans isomerase FKBP8 OS=Homo sapiens OX=9606 GN=FKBP8 PE=1 SV=2;tr|U3KQ64|U3KQ64_HUMAN Peptidyl-proly	10	8	8	8	2020-06-28	2020-06-28	2020-06-28	44648	413	413;412;182;249;257;253;103;204;163;167	0	92808	535920000	24360000	10				759	112;680;1286;5047;5503;5629;6117;6568	True;True;True;True;True;True;True;True	121;731;1378;5400;5886;6019;6535;7013	188;1096;2072;2073;8179;8931;9190;9870;10622	193;1150;2210;2211;8860;9660;9661;9971;10681;11490	193;1150;2211;8860;9661;9971;10681;11490
Q96IK0	Q96IK0	2	2	2	Transmembrane protein 101	TMEM101	sp|Q96IK0|TM101_HUMAN Transmembrane protein 101 OS=Homo sapiens OX=9606 GN=TMEM101 PE=1 SV=1	1	2	2	2	2020-05-10	2020-05-10	2020-05-10	28795	257	257	0	37544	194820000	24352000	8				968	3549;5968	True;True	3762;6377	5835;5836;5837;5838;5839;5840;5841;9663	6358;6359;6360;6361;6362;6363;6364;6365;10470	6359;10470
Q9Y6C9;E9PIE4	Q9Y6C9;E9PIE4	7;4	7;4	7;4	Mitochondrial carrier homolog 2	MTCH2	sp|Q9Y6C9|MTCH2_HUMAN Mitochondrial carrier homolog 2 OS=Homo sapiens OX=9606 GN=MTCH2 PE=1 SV=1;tr|E9PIE4|E9PIE4_HUMAN Mitochondrial carrier homolog 2 (Fragment) OS=Homo sapiens OX=9606 GN=MTCH2 PE=1 SV=8	2	7	7	7	33.7	33.7	33.7	33331	303	303;262	0	55911	437950000	24331000	10				1146	102;2069;2245;3238;4905;5008;6177	True;True;True;True;True;True;True	110;111;2210;2397;3442;5250;5360;6597	176;177;178;3272;3607;5343;7974;8132;8133;9979;9980	181;182;183;3497;3905;5809;8651;8813;8814;10808;10809	182;3497;3905;5809;8651;8813;10808	583	22
P20338;A0A087WYT5;P61018;P61018-2	P20338	5;2;1;1	5;2;1;1	5;2;1;1	Ras-related protein Rab-4A	RAB4A	sp|P20338|RAB4A_HUMAN Ras-related protein Rab-4A OS=Homo sapiens OX=9606 GN=RAB4A PE=1 SV=3	4	5	5	5	2020-09-28	2020-09-28	2020-09-28	24389	218	218;113;213;248	0	48.71	362660000	24177000	6				581	914;1878;2008;4096;5039	True;True;True;True;True	976;2006;2146;4361;5391	1449;1450;2980;3190;6625;8170	1525;1526;3194;3412;7181;8851	1525;3194;3412;7181;8851
Q9UL25	Q9UL25	6	6	6	Ras-related protein Rab-21	RAB21	sp|Q9UL25|RAB21_HUMAN Ras-related protein Rab-21 OS=Homo sapiens OX=9606 GN=RAB21 PE=1 SV=3	1	6	6	6	2020-07-30	2020-07-30	2020-07-30	24347	225	225	0	73542	435010000	24167000	6				1114	11;1798;2159;2586;4101;5774	True;True;True;True;True;True	12;1924;2304;2757;4367;6171	13;2881;3425;4316;4317;6631;9375	13;3093;3685;4702;4703;7187;10166	13;3093;3685;4703;7187;10166
P35606-2;P35606;D6RBT6;H0YAC7;D6R997;D6RBZ7;D6RCL6;D6RBG7;H0Y938	P35606-2;P35606	22;22;3;3;3;2;2;2;2	22;22;3;3;3;2;2;2;2	22;22;3;3;3;2;2;2;2	Coatomer subunit beta	COPB2	sp|P35606-2|COPB2_HUMAN Isoform 2 of Coatomer subunit beta OS=Homo sapiens OX=9606 GN=COPB2;sp|P35606|COPB2_HUMAN Coatomer subunit beta OS=Homo sapiens OX=9606 GN=COPB2 PE=1 SV=2	9	22	22	22	38.1	38.1	38.1	99045	877	877;906;111;118;152;77;86;89;177	0	164.98	1374000000	24106000	22				626	27;653;963;979;1588;2307;2370;2553;3024;4402;4505;4667;4861;4945;5114;5514;5868;6008;6051;6109;6439;6446	True;True;True;True;True;True;True;True;True;True;True;True;True;True;True;True;True;True;True;True;True;True	28;703;1030;1047;1698;2463;2531;2723;3216;4730;4840;5007;5206;5292;5477;5897;6272;6420;6466;6527;6879;6886	29;1060;1595;1613;2609;2610;3802;3954;4269;5003;7246;7423;7620;7920;8038;8274;8945;9539;9719;9779;9780;9862;10446;10455	29;1114;1697;1715;2819;2820;4131;4306;4654;5448;7873;8068;8271;8596;8718;8956;9675;10343;10528;10588;10589;10673;11306;11315	29;1114;1697;1715;2819;4131;4306;4654;5448;7873;8068;8271;8596;8718;8956;9675;10343;10528;10589;10673;11306;11315
Q9BX95	Q9BX95	7	7	7	Sphingosine-1-phosphate phosphatase 1	SGPP1	sp|Q9BX95|SGPP1_HUMAN Sphingosine-1-phosphate phosphatase 1 OS=Homo sapiens OX=9606 GN=SGPP1 PE=1 SV=2	1	7	7	7	2020-02-15	2020-02-15	2020-02-15	49107	441	441	0	62793	452930000	23838000	7				1022	2696;2972;3233;3742;4287;4442;4504	True;True;True;True;True;True;True	2871;3160;3437;3964;4604;4774;4839	4545;4927;5336;6094;7081;7330;7422	4971;5372;5802;6620;7700;7972;8067	4971;5372;5802;6620;7700;7972;8067
A0A087WZK9;B3KS98;O15372;E5RJT0;E5RGU4;E5RHC7;E5RH59;E5RFW7;E5RFH0	A0A087WZK9;B3KS98;O15372;E5RJT0	7;7;7;5;3;1;1;1;1	7;7;7;5;3;1;1;1;1	7;7;7;5;3;1;1;1;1	Eukaryotic translation initiation factor 3 subunit H	EIF3H	tr|A0A087WZK9|A0A087WZK9_HUMAN Eukaryotic translation initiation factor 3 subunit H OS=Homo sapiens OX=9606 GN=EIF3H PE=1 SV=1;tr|B3KS98|B3KS98_HUMAN Eukaryotic translation initiation factor 3 subunit H OS=Homo sapiens OX=9606 GN=EIF3H PE=1 SV=1;sp|O15372|	9	7	7	7	2020-09-22	2020-09-22	2020-09-22	39589	349	349;366;352;244;235;46;56;97;170	0	49703	595500000	23820000	7				30	828;1330;2080;2425;4373;5491;5934	True;True;True;True;True;True;True	885;1422;2221;2588;4695;5873;6342	1317;2246;3284;4039;7205;8908;9625	1385;2440;3509;4394;7829;9636;10432	1385;2440;3509;4394;7829;9636;10432
Q9H237-5;Q9H237-4;Q9H237-3;Q9H237-2;Q9H237	Q9H237-5;Q9H237-4;Q9H237-3;Q9H237-2;Q9H237	3;3;3;3;3	3;3;3;3;3	3;3;3;3;3	Protein-serine O-palmitoleoyltransferase porcupine	PORCN	sp|Q9H237-5|PORCN_HUMAN Isoform 5 of Protein-serine O-palmitoleoyltransferase porcupine OS=Homo sapiens OX=9606 GN=PORCN;sp|Q9H237-4|PORCN_HUMAN Isoform 4 of Protein-serine O-palmitoleoyltransferase porcupine OS=Homo sapiens OX=9606 GN=PORCN;sp|Q9H237-3|PO	5	3	3	3	2020-06-06	2020-06-06	2020-06-06	42878	379	379;450;455;456;461	0	29247	331870000	23705000	3				1032	864;3400;4587	True;True;True	924;3610;4926	1363;5592;7528	1431;6093;8178	1431;6093;8178
Q15738;C9JDR0	Q15738;C9JDR0	10;7	10;7	10;7	Sterol-4-alpha-carboxylate 3-dehydrogenase, decarboxylating	NSDHL	sp|Q15738|NSDHL_HUMAN Sterol-4-alpha-carboxylate 3-dehydrogenase, decarboxylating OS=Homo sapiens OX=9606 GN=NSDHL PE=1 SV=2;tr|C9JDR0|C9JDR0_HUMAN Sterol-4-alpha-carboxylate 3-dehydrogenase, decarboxylating (Fragment) OS=Homo sapiens OX=9606 GN=NSDHL PE=1	2	10	10	10	37.8	37.8	37.8	41.9	373	373;254	0	81515	694490000	23150000	8				776	175;715;1008;1764;2390;2842;4378;4555;4718;5607	True;True;True;True;True;True;True;True;True;True	191;769;1078;1888;2553;3022;4700;4891;5058;5996	285;1149;1649;2843;3996;4757;7210;7484;7677;9157	299;1206;1752;3055;4351;5200;7834;8134;8329;9934	299;1206;1752;3055;4351;5200;7834;8134;8329;9934
H0YLY9;Q14442;H0YLD0;H0YNL7;B4DEE2;H0YKZ3;H0YMT4	H0YLY9;Q14442;H0YLD0	3;3;2;1;1;1;1	3;3;2;1;1;1;1	3;3;2;1;1;1;1	Phosphatidylinositol N-acetylglucosaminyltransferase subunit H	PIGH	tr|H0YLY9|H0YLY9_HUMAN Phosphatidylinositol N-acetylglucosaminyltransferase subunit H OS=Homo sapiens OX=9606 GN=PIGH PE=1 SV=1;sp|Q14442|PIGH_HUMAN Phosphatidylinositol N-acetylglucosaminyltransferase subunit H OS=Homo sapiens OX=9606 GN=PIGH PE=1 SV=1;tr	7	3	3	3	15	15	15	20952	187	187;188;137;83;133;137;183	0	19646	296640000	22818000	3				334	3239;5044;5116	True;True;True	3443;5397;5479	5344;8176;8276	5810;8857;8958	5810;8857;8958
Q9UBS4;H7C2Y5	Q9UBS4	4;1	4;1	4;1	DnaJ homolog subfamily B member 11	DNAJB11	sp|Q9UBS4|DJB11_HUMAN DnaJ homolog subfamily B member 11 OS=Homo sapiens OX=9606 GN=DNAJB11 PE=1 SV=1	2	4	4	4	2020-05-11	2020-05-11	2020-05-11	40513	358	358;167	0	29384	520740000	22641000	5				1100	3078;3187;4408;5806	True;True;True;True	3274;3388;4736;6208	5124;5280;5281;7253;9445	5581;5744;5745;7880;10243	5581;5745;7880;10243
Q5JR04;Q9HCE1-2;Q9HCE1	Q5JR04;Q9HCE1-2;Q9HCE1	1;1;1	1;1;1	1;1;1	Putative helicase MOV-10	MOV10	tr|Q5JR04|Q5JR04_HUMAN Helicase MOV-10 OS=Homo sapiens OX=9606 GN=MOV10 PE=1 SV=1;sp|Q9HCE1-2|MOV10_HUMAN Isoform 2 of Helicase MOV-10 OS=Homo sapiens OX=9606 GN=MOV10;sp|Q9HCE1|MOV10_HUMAN Helicase MOV-10 OS=Homo sapiens OX=9606 GN=MOV10 PE=1 SV=2	3	1	1	1	0.8	0.8	0.8	107.21	947	947;900;1003	0.0027855	60878	1598800000	22518000	2				800	3566	True	3779	5861;5862	6385;6386	6386
P53396;P53396-2;P53396-3;K7ESG8	P53396;P53396-2;P53396-3	22;21;16;5	22;21;16;5	22;21;16;5	ATP-citrate synthase	ACLY	sp|P53396|ACLY_HUMAN ATP-citrate synthase OS=Homo sapiens OX=9606 GN=ACLY PE=1 SV=3;sp|P53396-2|ACLY_HUMAN Isoform 2 of ATP-citrate synthase OS=Homo sapiens OX=9606 GN=ACLY;sp|P53396-3|ACLY_HUMAN Isoform 3 of ATP-citrate synthase OS=Homo sapiens OX=9606 GN	4	22	22	22	2020-03-27	2020-03-27	2020-03-27	120.84	1101	1101;1091;830;109	0	183.21	1616800000	22456000	24				673	803;952;1808;2281;2382;2539;2713;3083;3407;3416;3601;3637;3876;4501;5032;5126;5494;5617;5634;5787;6369;6501	True;True;True;True;True;True;True;True;True;True;True;True;True;True;True;True;True;True;True;True;True;True	860;1016;1934;2435;2544;2707;2888;3279;3617;3627;3814;3853;4103;4836;5384;5490;5877;6006;6024;6187;6802;6942	1289;1563;1564;2896;3735;3985;4250;4564;5131;5600;5611;5903;5904;5952;6271;7418;8163;8293;8918;9175;9195;9400;10319;10522	1355;1660;1661;3109;4056;4340;4634;4990;5589;6101;6112;6427;6428;6476;6806;8063;8844;8975;9646;9956;9976;10193;11167;11385	1355;1660;3109;4056;4340;4634;4990;5589;6101;6112;6428;6476;6806;8063;8844;8975;9646;9956;9976;10193;11167;11385	343	474
P48643;B7ZAR1;E9PCA1;E7ENZ3;P48643-2;D6RIZ7	P48643;B7ZAR1;E9PCA1;E7ENZ3;P48643-2	13;12;12;11;10;1	13;12;12;11;10;1	13;12;12;11;10;1	T-complex protein 1 subunit epsilon	CCT5	sp|P48643|TCPE_HUMAN T-complex protein 1 subunit epsilon OS=Homo sapiens OX=9606 GN=CCT5 PE=1 SV=1;tr|B7ZAR1|B7ZAR1_HUMAN T-complex protein 1 subunit epsilon OS=Homo sapiens OX=9606 GN=CCT5 PE=1 SV=1;tr|E9PCA1|E9PCA1_HUMAN T-complex protein 1 subunit epsil	6	13	13	13	38.6	38.6	38.6	59.67	541	541;503;520;486;448;44	0	135.53	965090000	22444000	15				647	493;826;839;1094;1469;1585;2613;2621;3381;4102;5215;5318;6548	True;True;True;True;True;True;True;True;True;True;True;True;True	530;883;897;1169;1574;1695;2785;2795;3591;4368;5581;5689;6993	813;1315;1333;1763;2462;2606;4353;4451;5566;6632;8420;8421;8635;8636;10600	849;1383;1401;1873;2662;2816;4740;4872;6066;7188;9109;9110;9346;9347;11466;11467	849;1383;1401;1873;2662;2816;4740;4872;6066;7188;9109;9347;11466
E9PN66;E9PKN9;E9PS55;E9PMW4;E9PQ46;E9PIN5;E9PIK4;U3KQ32;E9PKZ4;E9PPM1;O14683;E9PNB3;E9PMY0	E9PN66;E9PKN9;E9PS55;E9PMW4;E9PQ46;E9PIN5;E9PIK4;U3KQ32;E9PKZ4;E9PPM1;O14683;E9PNB3;E9PMY0	2;2;2;2;2;2;2;2;2;2;2;1;1	2;2;2;2;2;2;2;2;2;2;2;1;1	2;2;2;2;2;2;2;2;2;2;2;1;1	Tumor protein p53-inducible protein 11	TP53I11	tr|E9PN66|E9PN66_HUMAN Tumor protein p53-inducible protein 11 (Fragment) OS=Homo sapiens OX=9606 GN=TP53I11 PE=1 SV=1;tr|E9PKN9|E9PKN9_HUMAN Tumor protein p53-inducible protein 11 (Fragment) OS=Homo sapiens OX=9606 GN=TP53I11 PE=1 SV=1;tr|E9PS55|E9PS55_HUM	13	2	2	2	40.3	40.3	40.3	68649	62	62;73;79;93;98;123;126;154;158;236;189;64;91	0	15761	111840000	22369000	3				259	2805;2955	True;True	2982;3143	4703;4704;4901	5143;5144;5346	5143;5346
P78371;F5GWF6;P78371-2;F8VQ14	P78371;F5GWF6;P78371-2;F8VQ14	15;14;13;12	15;14;13;12	15;14;13;12	T-complex protein 1 subunit beta	CCT2	sp|P78371|TCPB_HUMAN T-complex protein 1 subunit beta OS=Homo sapiens OX=9606 GN=CCT2 PE=1 SV=4;tr|F5GWF6|F5GWF6_HUMAN T-complex protein 1 subunit beta OS=Homo sapiens OX=9606 GN=CCT2 PE=1 SV=2;sp|P78371-2|TCPB_HUMAN Isoform 2 of T-complex protein 1 subuni	4	15	15	15	35.5	35.5	35.5	57488	535	535;530;488;416	0	164.99	914050000	22294000	19				722	39;492;1181;1189;2033;2300;2807;2816;3223;3465;3891;4128;4313;5216;6199	True;True;True;True;True;True;True;True;True;True;True;True;True;True;True	43;529;1263;1271;1272;2173;2456;2984;2993;3426;3677;4119;4403;4632;5582;6620	98;812;1872;1873;1881;1882;3223;3763;4706;4715;5324;5680;6299;6682;6683;7125;8422;8423;10031	103;848;1984;1985;1986;1995;1996;3445;4086;5146;5155;5790;6183;6835;7257;7258;7747;9111;9112;10864	103;848;1985;1995;3445;4086;5146;5155;5790;6183;6835;7258;7747;9112;10864	383	436
C9JQU8;C9JDY5;Q99574	C9JQU8;C9JDY5;Q99574	1;1;1	1;1;1	1;1;1	Neuroserpin	SERPINI1	tr|C9JQU8|C9JQU8_HUMAN Neuroserpin (Fragment) OS=Homo sapiens OX=9606 GN=SERPINI1 PE=1 SV=1;tr|C9JDY5|C9JDY5_HUMAN Neuroserpin (Fragment) OS=Homo sapiens OX=9606 GN=SERPINI1 PE=1 SV=1;sp|Q99574|NEUS_HUMAN Neuroserpin OS=Homo sapiens OX=9606 GN=SERPINI1 PE=	3	1	1	1	2020-05-07	2020-05-07	2020-05-07	17975	160	160;245;410	0.0036331	59054	155990000	22284000	1				175	1375	True	1468	2308	2502	2502	62	76
K7EIY6;Q9BV68	K7EIY6;Q9BV68	1;1	1;1	1;1	E3 ubiquitin-protein ligase RNF126	RNF126	tr|K7EIY6|K7EIY6_HUMAN E3 ubiquitin-protein ligase RNF126 (Fragment) OS=Homo sapiens OX=9606 GN=RNF126 PE=1 SV=7;sp|Q9BV68|RN126_HUMAN E3 ubiquitin-protein ligase RNF126 OS=Homo sapiens OX=9606 GN=RNF126 PE=1 SV=2	2	1	1	1	2020-05-08	2020-05-08	2020-05-08	30785	283	283;311	0.0011211	10656	222790000	22279000	1				386	2904	True	3090	4830	5275	5275
Q9NZC7;Q9NZC7-2;Q9NZC7-5;A0A087WZG5;F5H3R5;Q9NZC7-3;Q9NZC7-7;Q9NZC7-6	Q9NZC7;Q9NZC7-2	8;7;3;2;2;2;2;2	8;7;3;2;2;2;2;2	8;7;3;2;2;2;2;2	WW domain-containing oxidoreductase	WWOX	sp|Q9NZC7|WWOX_HUMAN WW domain-containing oxidoreductase OS=Homo sapiens OX=9606 GN=WWOX PE=1 SV=1;sp|Q9NZC7-2|WWOX_HUMAN Isoform 2 of WW domain-containing oxidoreductase OS=Homo sapiens OX=9606 GN=WWOX	8	8	8	8	2020-07-21	2020-07-21	2020-07-21	46676	414	414;363;234;150;213;189;213;311	0	64812	665510000	22184000	11				1087	686;858;1954;2788;5433;5957;6104;6579	True;True;True;True;True;True;True;True	737;738;916;2089;2965;5811;6366;6522;7029	1103;1104;1354;3095;4683;8794;8795;9650;9854;9855;10647	1157;1158;1422;3312;5123;9512;9513;10457;10665;10666;11519	1157;1422;3312;5123;9512;10457;10666;11519	543	383
P13010;C9JZ81;H7C0H9	P13010	20;3;1	20;3;1	20;3;1	X-ray repair cross-complementing protein 5	XRCC5	sp|P13010|XRCC5_HUMAN X-ray repair cross-complementing protein 5 OS=Homo sapiens OX=9606 GN=XRCC5 PE=1 SV=3	3	20	20	20	38.3	38.3	38.3	82704	732	732;131;19	0	178.53	1186100000	21964000	23				560	400;777;912;1209;1210;1235;1609;1892;2498;2917;3345;3384;3874;4829;5325;5530;5860;5933;6102;6558	True;True;True;True;True;True;True;True;True;True;True;True;True;True;True;True;True;True;True;True	434;834;974;1294;1295;1322;1721;2025;2665;3104;3553;3594;4101;5173;5696;5913;6264;6341;6519;7003	670;1244;1447;1907;1908;1940;2638;3004;4197;4198;4849;5518;5569;5570;6269;7875;8645;8971;9531;9624;9851;10611;10612	700;1308;1523;2021;2022;2056;2849;3218;4579;4580;5294;6017;6069;6070;6804;8543;9356;9707;10335;10431;10662;11478;11479	700;1308;1523;2021;2022;2056;2849;3218;4580;5294;6017;6069;6804;8543;9356;9707;10335;10431;10662;11478
Q969X5-2;Q969X5	Q969X5-2;Q969X5	6;6	6;6	6;6	Endoplasmic reticulum-Golgi intermediate compartment protein 1	ERGIC1	sp|Q969X5-2|ERGI1_HUMAN Isoform 2 of Endoplasmic reticulum-Golgi intermediate compartment protein 1 OS=Homo sapiens OX=9606 GN=ERGIC1;sp|Q969X5|ERGI1_HUMAN Endoplasmic reticulum-Golgi intermediate compartment protein 1 OS=Homo sapiens OX=9606 GN=ERGIC1 PE=	2	6	6	6	37.4	37.4	37.4	22.16	198	198;290	0	38131	285230000	21941000	7				947	1677;2767;3012;3810;3892;6583	True;True;True;True;True;True	1795;2942;3203;4033;4120;7033	2723;2724;4645;4985;6176;6300;10653	2934;2935;5083;5430;6703;6836;11525	2934;5083;5430;6703;6836;11525
P49257	P49257	6	6	6	Protein ERGIC-53	LMAN1	sp|P49257|LMAN1_HUMAN Protein ERGIC-53 OS=Homo sapiens OX=9606 GN=LMAN1 PE=1 SV=2	1	6	6	6	2020-01-16	2020-01-16	2020-01-16	57548	510	510	0	37548	614300000	21939000	4				650	1342;2149;3951;4443;4909;6754	True;True;True;True;True;True	1435;2294;4180;4775;5254;7217	2265;3414;6374;7331;7978;10884	2459;3673;6912;7973;8655;11761	2459;3673;6912;7973;8655;11761
Q10471-2;Q10471	Q10471-2;Q10471	3;3	3;3	3;3	Polypeptide N-acetylgalactosaminyltransferase 2;Polypeptide N-acetylgalactosaminyltransferase 2 soluble form	GALNT2	sp|Q10471-2|GALT2_HUMAN Isoform 2 of Polypeptide N-acetylgalactosaminyltransferase 2 OS=Homo sapiens OX=9606 GN=GALNT2;sp|Q10471|GALT2_HUMAN Polypeptide N-acetylgalactosaminyltransferase 2 OS=Homo sapiens OX=9606 GN=GALNT2 PE=1 SV=1	2	3	3	3	2020-07-14	2020-07-14	2020-07-14	30255	265	265;571	0	20.31	456530000	21740000	4				742	1893;4764;6188	True;True;True	2026;5106;6609	3005;7744;9993;9994	3219;8398;10822;10823	3219;8398;10823
I3L0X9;I3L3T0;P57737-3;A0A0A6YYL4;Q9Y3D7;I3L1U7	I3L0X9;I3L3T0;P57737-3;A0A0A6YYL4;Q9Y3D7;I3L1U7	5;5;5;5;5;4	5;5;5;5;5;4	5;5;5;5;5;4	Coronin;Mitochondrial import inner membrane translocase subunit TIM16	PAM16;CORO7-PAM16	tr|I3L0X9|I3L0X9_HUMAN Mitochondrial import inner membrane translocase subunit TIM16 OS=Homo sapiens OX=9606 GN=PAM16 PE=4 SV=1;tr|I3L3T0|I3L3T0_HUMAN HCG15164, isoform CRA_b OS=Homo sapiens OX=9606 GN=PAM16 PE=4 SV=1;sp|P57737-3|CORO7_HUMAN Isoform 3 of C	6	5	5	5	41.6	41.6	41.6	15131	137	137;145;1048;1048;125;129	0	56672	238790000	21708000	5				52	1550;3828;4488;5005;5420	True;True;True;True;True	1659;4052;4823;5357;5797	2558;6198;7402;8129;8777	2760;6725;8047;8810;9495	2760;6725;8047;8810;9495
Q15758;M0QXM4;Q15758-3;Q15758-2;M0QX44	Q15758;M0QXM4;Q15758-3;Q15758-2	5;4;3;3;2	5;4;3;3;2	5;4;3;3;2	Neutral amino acid transporter B(0);Amino acid transporter	SLC1A5	sp|Q15758|AAAT_HUMAN Neutral amino acid transporter B(0) OS=Homo sapiens OX=9606 GN=SLC1A5 PE=1 SV=2;tr|M0QXM4|M0QXM4_HUMAN Amino acid transporter OS=Homo sapiens OX=9606 GN=SLC1A5 PE=1 SV=1;sp|Q15758-3|AAAT_HUMAN Isoform 3 of Neutral amino acid transporte	5	5	5	5	2020-05-11	2020-05-11	2020-05-11	56598	541	541;365;313;339;258	0	40313	367820000	21637000	5				777	718;1634;2254;5094;5460	True;True;True;True;True	772;1749;2407;5454;5839	1152;2671;3623;8243;8860	1209;2882;3921;8925;9586	1209;2882;3921;8925;9586
Q92905;E5RHH5;E5RHF2;E5RFS1;E5RG35;E5RK55	Q92905	7;3;2;1;1;1	7;3;2;1;1;1	7;3;2;1;1;1	COP9 signalosome complex subunit 5	COPS5	sp|Q92905|CSN5_HUMAN COP9 signalosome complex subunit 5 OS=Homo sapiens OX=9606 GN=COPS5 PE=1 SV=4	6	7	7	7	2020-03-21	2020-03-21	2020-03-21	37578	334	334;197;151;57;68;78	0	45133	449310000	21396000	7				938	2938;3310;3532;4873;5127;5798;6237	True;True;True;True;True;True;True	3126;3516;3745;5218;5491;6199;6662	4877;5447;5811;7932;8294;9415;10081	5322;5931;6333;8608;8976;10208;10915	5322;5931;6333;8608;8976;10208;10915
P12956;B1AHC9;P12956-2	P12956;B1AHC9;P12956-2	13;12;12	13;12;12	13;12;12	X-ray repair cross-complementing protein 6	XRCC6	sp|P12956|XRCC6_HUMAN X-ray repair cross-complementing protein 6 OS=Homo sapiens OX=9606 GN=XRCC6 PE=1 SV=2;tr|B1AHC9|B1AHC9_HUMAN X-ray repair cross-complementing protein 6 OS=Homo sapiens OX=9606 GN=XRCC6 PE=1 SV=1;sp|P12956-2|XRCC6_HUMAN Isoform 2 of X-	3	13	13	13	2020-01-26	2020-01-26	2020-01-26	69842	609	609;559;568	0	116.67	1003500000	21350000	14				559	1061;1076;1269;2790;2928;3116;4325;4345;4597;5071;5568;5988;6045	True;True;True;True;True;True;True;True;True;True;True;True;True	1133;1149;1360;2967;3115;3313;4644;4665;4936;5428;5955;6397;6460	1715;1734;2048;4685;4860;5178;7140;7172;7173;7541;8213;9103;9691;9771	1821;1841;2186;5125;5305;5639;7763;7796;7797;8191;8895;9877;10500;10580	1821;1841;2186;5125;5305;5639;7763;7796;8191;8895;9877;10500;10580
Q5TB53;Q9HD45	Q5TB53;Q9HD45	5;5	5;5	5;5	Transmembrane 9 superfamily member 3	TM9SF3	tr|Q5TB53|Q5TB53_HUMAN Transmembrane 9 superfamily member (Fragment) OS=Homo sapiens OX=9606 GN=TM9SF3 PE=1 SV=8;sp|Q9HD45|TM9S3_HUMAN Transmembrane 9 superfamily member 3 OS=Homo sapiens OX=9606 GN=TM9SF3 PE=1 SV=2	2	5	5	5	2020-09-28	2020-09-28	2020-09-28	29881	253	253;589	0	33416	339810000	21238000	6				808	744;1239;5171;6629;6688	True;True;True;True;True	800;1326;5537;7080;7147	1197;1945;8358;10714;10795;10796	1257;2061;9046;11586;11669;11670	1257;2061;9046;11586;11669
P35610;P35610-3;P35610-2;B1APM4	P35610;P35610-3;P35610-2	9;7;7;4	9;7;7;4	9;7;7;4	Sterol O-acyltransferase 1	SOAT1	sp|P35610|SOAT1_HUMAN Sterol O-acyltransferase 1 OS=Homo sapiens OX=9606 GN=SOAT1 PE=1 SV=3;sp|P35610-3|SOAT1_HUMAN Isoform 3 of Sterol O-acyltransferase 1 OS=Homo sapiens OX=9606 GN=SOAT1;sp|P35610-2|SOAT1_HUMAN Isoform 2 of Sterol O-acyltransferase 1 OS=	4	9	9	9	2020-01-21	2020-01-21	2020-01-21	64734	550	550;485;492;260	0	74634	678150000	21192000	8				627	251;821;1125;1567;1630;1816;3854;5027;5375	True;True;True;True;True;True;True;True;True	272;878;1202;1677;1744;1942;4080;5379;5749	393;1310;1801;2586;2664;2905;6246;8158;8720	411;1378;1911;2796;2875;3118;6781;8839;9438	411;1378;1911;2796;2875;3118;6781;8839;9438
Q96HD1-2;Q96HD1;F8WBY3	Q96HD1-2;Q96HD1	8;8;2	8;8;2	8;8;2	Cysteine-rich with EGF-like domain protein 1	CRELD1	sp|Q96HD1-2|CREL1_HUMAN Isoform 2 of Cysteine-rich with EGF-like domain protein 1 OS=Homo sapiens OX=9606 GN=CRELD1;sp|Q96HD1|CREL1_HUMAN Cysteine-rich with EGF-like domain protein 1 OS=Homo sapiens OX=9606 GN=CRELD1 PE=1 SV=3	3	8	8	8	2020-08-21	2020-08-21	2020-08-21	45941	422	422;420;101	0	90582	550900000	21188000	8				964	654;708;966;2222;2388;3534;4863;5056	True;True;True;True;True;True;True;True	704;761;1033;2372;2551;3747;5208;5409	1061;1141;1598;3554;3993;3994;5813;7922;8189	1115;1198;1700;3834;4348;4349;6335;8598;8870	1115;1198;1700;3834;4349;6335;8598;8870
P56589;Q7Z6V3	P56589	7;2	7;2	7;2	Peroxisomal biogenesis factor 3	PEX3	sp|P56589|PEX3_HUMAN Peroxisomal biogenesis factor 3 OS=Homo sapiens OX=9606 GN=PEX3 PE=1 SV=1	2	7	7	7	34.6	34.6	34.6	42139	373	373;182	0	75859	486030000	21132000	6				688	809;964;1141;2557;2768;3520;5446	True;True;True;True;True;True;True	866;1031;1221;2727;2943;3733;5824	1298;1596;1821;4273;4646;5744;8811	1366;1698;1931;4658;5084;6247;9529	1366;1698;1931;4658;5084;6247;9529
Q8N6M3;Q9UJ96	Q8N6M3	4;1	4;1	4;1	Fat storage-inducing transmembrane protein 2	FITM2	sp|Q8N6M3|FITM2_HUMAN Fat storage-inducing transmembrane protein 2 OS=Homo sapiens OX=9606 GN=FITM2 PE=1 SV=1	2	4	4	4	2020-04-13	2020-04-13	2020-04-13	29855	262	262;466	0	25678	252540000	21045000	4				883	225;642;4056;6706	True;True;True;True	243;691;4310;7165	347;1044;6561;10814	361;1098;7115;11688	361;1098;7115;11688
A0A087WU02;Q96RQ1;F8W0R1;H0YI50;F8VPA6;H0YI58;F8VR88;F8VUZ2;H0YHJ8	A0A087WU02;Q96RQ1;F8W0R1;H0YI50;F8VPA6	5;5;3;3;3;2;2;2;1	5;5;3;3;3;2;2;2;1	5;5;3;3;3;2;2;2;1	Endoplasmic reticulum-Golgi intermediate compartment protein 2	ERGIC2	tr|A0A087WU02|A0A087WU02_HUMAN Endoplasmic reticulum-Golgi intermediate compartment protein 2 OS=Homo sapiens OX=9606 GN=ERGIC2 PE=1 SV=1;sp|Q96RQ1|ERGI2_HUMAN Endoplasmic reticulum-Golgi intermediate compartment protein 2 OS=Homo sapiens OX=9606 GN=ERGIC2	9	5	5	5	2020-08-16	2020-08-16	2020-08-16	43432	386	386;377;172;209;220;163;175;203;57	0	39922	504080000	21003000	6				8	2656;2725;2936;3746;4129	True;True;True;True;True	2830;2900;3124;3968;4404	4494;4577;4874;4875;6098;6684	4918;5003;5319;5320;6624;7259	4918;5003;5319;6624;7259
K7ESP4;Q8WVC6;Q8WVC6-2	K7ESP4;Q8WVC6	6;6;1	6;6;1	6;6;1	Dephospho-CoA kinase domain-containing protein	DCAKD	tr|K7ESP4|K7ESP4_HUMAN Dephospho-CoA kinase domain-containing protein (Fragment) OS=Homo sapiens OX=9606 GN=DCAKD PE=1 SV=1;sp|Q8WVC6|DCAKD_HUMAN Dephospho-CoA kinase domain-containing protein OS=Homo sapiens OX=9606 GN=DCAKD PE=1 SV=1	3	6	6	6	31.6	31.6	31.6	24177	209	209;231;132	0	54469	314410000	20961000	6				404	2582;2590;2861;4914;5205;6799	True;True;True;True;True;True	2753;2761;3046;5260;5571;7264	4312;4321;4783;7987;8409;10949	4698;4707;5227;8665;9098;11828	4698;4707;5227;8665;9098;11828
P67936;P67936-2;A0A2R8Y5V9;A0A2R8YE05;K7ENT6;A0A2R8YGX3;A0A2R8YH90;A0A2R8YEU4;P07951;Q5TCU3;K7ERG3;K7EMU5;Q5TCU8;K7EPV9;P07951-3;CON__Q3SX28;A7XZE4;P07951-2;A0A2R8YHD2;K7EP68;K7EPB9;U3KQK2	P67936;P67936-2;A0A2R8Y5V9;A0A2R8YE05;K7ENT6;A0A2R8YGX3;A0A2R8YH90;A0A2R8YEU4;P07951;Q5TCU3;K7ERG3;K7EMU5;Q5TCU8	14;12;12;12;12;11;10;9;7;7;7;7;7;6;6;6;6;6;6;5;5;4	8;6;6;6;6;6;4;4;2;2;2;4;2;4;1;1;1;1;4;0;4;2	8;6;6;6;6;6;4;4;2;2;2;4;2;4;1;1;1;1;4;0;4;2	Tropomyosin alpha-4 chain;Tropomyosin beta chain	TPM4;TPM2	sp|P67936|TPM4_HUMAN Tropomyosin alpha-4 chain OS=Homo sapiens OX=9606 GN=TPM4 PE=1 SV=3;sp|P67936-2|TPM4_HUMAN Isoform 2 of Tropomyosin alpha-4 chain OS=Homo sapiens OX=9606 GN=TPM4;tr|A0A2R8Y5V9|A0A2R8Y5V9_HUMAN Tropomyosin alpha-4 chain OS=Homo sapiens	22	14	8	8	51.2	33.5	33.5	28521	248	248;284;248;226;247;183;220;173;284;284;170;102;322;96;248;284;284;284;90;138;110;111	0	80581	511800000	20472000	8				718	221;648;1211;1262;2467;2905;2915;2916;3214;3923;3924;5199;5622;6595	True;True;False;True;False;True;False;False;False;True;True;True;True;False	239;698;1296;1351;2633;3091;3102;3103;3415;4152;4153;5565;6012;7045	343;1052;1909;1978;4103;4104;4105;4831;4846;4847;4848;5312;6339;6340;8402;9181;10669	357;1106;2023;2100;4459;4460;4461;4462;5276;5291;5292;5293;5778;6877;6878;9091;9962;11541	357;1106;2023;2100;4460;5276;5291;5293;5778;6877;6878;9091;9962;11541
Q15286;F5H157;Q15286-2;F5H7F8	Q15286;F5H157;Q15286-2	7;6;4;1	6;5;3;1	6;5;3;1	Ras-related protein Rab-35	RAB35	sp|Q15286|RAB35_HUMAN Ras-related protein Rab-35 OS=Homo sapiens OX=9606 GN=RAB35 PE=1 SV=1;tr|F5H157|F5H157_HUMAN Ras-related protein Rab-35 (Fragment) OS=Homo sapiens OX=9606 GN=RAB35 PE=1 SV=1;sp|Q15286-2|RAB35_HUMAN Isoform 2 of Ras-related protein Rab	4	7	6	6	36.3	33.3	33.3	23025	201	201;185;152;147	0	39396	326340000	20396000	6				772	1127;1502;4874;5361;5645;6394;6516	True;True;True;False;True;True;True	1205;1610;5219;5734;6035;6827;6959	1804;2499;7933;8691;9208;10347;10540	1914;2700;8609;9402;9989;11197;11403	1914;2700;8609;9402;9989;11197;11403
A0AVI4-2;A0AVI4	A0AVI4-2;A0AVI4	4;4	4;4	4;4	E3 ubiquitin-protein ligase TM129	TMEM129	sp|A0AVI4-2|TM129_HUMAN Isoform 2 of E3 ubiquitin-protein ligase TM129 OS=Homo sapiens OX=9606 GN=TMEM129;sp|A0AVI4|TM129_HUMAN E3 ubiquitin-protein ligase TM129 OS=Homo sapiens OX=9606 GN=TMEM129 PE=1 SV=1	2	4	4	4	2020-04-22	2020-04-22	2020-04-22	25914	232	232;362	0	47316	222160000	20196000	4				112	1699;4771;6060;6474	True;True;True;True	1817;5114;6475;6915	2756;7753;9791;10491	2967;8407;10600;11351	2967;8407;10600;11351
Q53FV1;F8VXD5;F8VWV8	Q53FV1;F8VXD5	4;3;1	2;2;1	2;2;1	ORM1-like protein 2	ORMDL2	sp|Q53FV1|ORML2_HUMAN ORM1-like protein 2 OS=Homo sapiens OX=9606 GN=ORMDL2 PE=1 SV=2;tr|F8VXD5|F8VXD5_HUMAN ORM1-like protein 2 OS=Homo sapiens OX=9606 GN=ORMDL2 PE=1 SV=1	3	4	2	2	34	17	17	17363	153	153;119;65	0	13716	161500000	20188000	2				792	2337;3628;3721;4155	False;True;True;False	2496;3844;3942;4449	3913;5940;6066;6821	4263;6464;6592;7406	4263;6464;6592;7406	414	1
Q9Y4L1;A0A087X054;E9PJ21;A0A087WWI4;K7EQK2;Q9Y4L1-2;J3KTF1;J3QL06;Q9BST8;J3QQH7;J3QLE9;A0A087X214;A0A087WW13	Q9Y4L1;A0A087X054;E9PJ21;A0A087WWI4;K7EQK2;Q9Y4L1-2	22;21;17;17;17;15;8;7;4;4;4;1;1	22;21;17;17;17;15;8;7;4;4;4;1;1	22;21;17;17;17;15;8;7;4;4;4;1;1	Hypoxia up-regulated protein 1	HYOU1	sp|Q9Y4L1|HYOU1_HUMAN Hypoxia up-regulated protein 1 OS=Homo sapiens OX=9606 GN=HYOU1 PE=1 SV=1;tr|A0A087X054|A0A087X054_HUMAN Hypoxia up-regulated protein 1 OS=Homo sapiens OX=9606 GN=HYOU1 PE=1 SV=1;tr|E9PJ21|E9PJ21_HUMAN Hypoxia up-regulated protein 1 (	13	22	22	22	34.5	34.5	34.5	111.33	999	999;937;656;677;678;559;224;211;147;149;154;92;102	0	210.21	1328200000	20125000	28				1137	58;576;768;770;1230;1620;1899;3237;3411;3482;3991;4322;4546;4680;5184;5836;6094;6178;6255;6290;6628;6772	True;True;True;True;True;True;True;True;True;True;True;True;True;True;True;True;True;True;True;True;True;True	64;621;825;827;1316;1733;2032;3441;3621;3694;4224;4641;4881;5020;5550;6239;6511;6598;6681;6718;7079;7237	122;965;1235;1237;1934;2650;2651;3020;5342;5604;5698;6453;7137;7471;7635;7636;8383;9503;9842;9981;9982;10107;10158;10712;10713;10910;10911	127;1017;1299;1301;2050;2861;2862;3236;5808;6105;6201;7006;7760;8121;8286;8287;9072;10306;10307;10653;10810;10811;10942;10994;11584;11585;11787;11788;11789	127;1017;1299;1301;2050;2862;3236;5808;6105;6201;7006;7760;8121;8287;9072;10306;10653;10811;10942;10994;11584;11787
P04259	P04259	25	12	1	Keratin, type II cytoskeletal 6B	KRT6B	sp|P04259|K2C6B_HUMAN Keratin, type II cytoskeletal 6B OS=Homo sapiens OX=9606 GN=KRT6B PE=1 SV=5	1	25	12	1	37.8	2020-04-25	2020-06-01	60066	564	564	0	93673	779970000	19999000	13				522	135;379;463;524;1674;1692;1693;2292;3182;3183;3530;3710;4328;4331;4332;4341;4343;4386;4702;4802;5260;5463;6589;6590;6591	True;True;False;True;True;False;False;True;False;False;False;True;True;False;False;False;False;True;True;True;True;True;False;False;False	148;410;500;562;1792;1810;1811;2448;3383;3384;3743;3931;4647;4650;4651;4660;4662;4712;5042;5146;5626;5842;7039;7040;7041	239;641;776;851;2720;2742;2743;2744;3754;5271;5272;5273;5274;5809;6052;7143;7147;7148;7149;7150;7164;7166;7167;7226;7659;7821;8565;8863;10660;10661;10662;10663;10664;10665	253;670;671;812;887;2931;2953;2954;2955;4077;5735;5736;5737;5738;6331;6578;7766;7770;7771;7772;7773;7788;7790;7791;7850;8311;8480;9275;9589;11532;11533;11534;11535;11536;11537	253;671;812;887;2931;2953;2954;4077;5736;5738;6331;6578;7766;7770;7772;7788;7791;7850;8311;8480;9275;9589;11532;11533;11535
P13674-2;P13674-3;P13674	P13674-2;P13674-3;P13674	9;8;8	9;8;8	9;8;8	Prolyl 4-hydroxylase subunit alpha-1	P4HA1	sp|P13674-2|P4HA1_HUMAN Isoform 2 of Prolyl 4-hydroxylase subunit alpha-1 OS=Homo sapiens OX=9606 GN=P4HA1;sp|P13674-3|P4HA1_HUMAN Isoform 3 of Prolyl 4-hydroxylase subunit alpha-1 OS=Homo sapiens OX=9606 GN=P4HA1;sp|P13674|P4HA1_HUMAN Prolyl 4-hydroxylase	3	9	9	9	2020-03-19	2020-03-19	2020-03-19	60966	534	534;516;534	0	98686	759900000	19997000	12				566	543;995;1800;2351;2404;3044;3531;3744;4801	True;True;True;True;True;True;True;True;True	585;1065;1926;2510;2567;3238;3744;3966;5145	883;884;1635;2883;2884;3929;4014;5077;5810;6096;7820	921;922;1737;3095;3096;4280;4281;4369;5533;6332;6622;8479	922;1737;3096;4281;4369;5533;6332;6622;8479
O00258-2;O00258;H7BYE5;H7C384;B7Z1T1;A0A3B3ISE9;A0A096LNT6;A0A3B3IUG4;B4DLW3;A0A3B3ISA8;A0A3B3ITX9;C9JLV3;A0A3B3ISE5;A0A3B3IT79	O00258-2;O00258;H7BYE5;H7C384;B7Z1T1;A0A3B3ISE9;A0A096LNT6;A0A3B3IUG4;B4DLW3;A0A3B3ISA8;A0A3B3ITX9	5;5;4;4;4;4;3;3;3;3;3;2;2;1	5;5;4;4;4;4;3;3;3;3;3;2;2;1	5;5;4;4;4;4;3;3;3;3;3;2;2;1	Tail-anchored protein insertion receptor WRB	WRB	sp|O00258-2|WRB_HUMAN Isoform 2 of Tail-anchored protein insertion receptor WRB OS=Homo sapiens OX=9606 GN=WRB;sp|O00258|WRB_HUMAN Tail-anchored protein insertion receptor WRB OS=Homo sapiens OX=9606 GN=WRB PE=1 SV=2;tr|H7BYE5|H7BYE5_HUMAN Tail-anchored pr	14	5	5	5	33.6	33.6	33.6	16011	140	140;174;116;139;172;173;69;72;103;135;273;35;59;96	0	32899	199610000	19961000	5				415	147;740;4733;6383;6508	True;True;True;True;True	160;796;5073;6816;6949	252;1193;7700;10335;10529	266;1253;8352;11183;11392	266;1253;8352;11183;11392
P31946-2;P31946;Q4VY20;Q4VY19;A0A0J9YWE8;A0A0J9YWZ2	P31946-2;P31946	7;7;3;3;3;2	3;3;1;1;1;1	3;3;1;1;1;1	14-3-3 protein beta/alpha;14-3-3 protein beta/alpha, N-terminally processed	YWHAB	sp|P31946-2|1433B_HUMAN Isoform Short of 14-3-3 protein beta/alpha OS=Homo sapiens OX=9606 GN=YWHAB;sp|P31946|1433B_HUMAN 14-3-3 protein beta/alpha OS=Homo sapiens OX=9606 GN=YWHAB PE=1 SV=3	6	7	3	3	32.4	2020-04-18	2020-04-18	27.85	244	244;246;74;100;149;81	0	96.99	396810000	19841000	4				620	596;1067;1472;3164;4362;4899;6700	True;False;False;False;False;True;True	644;1139;1140;1578;1579;3365;4683;5244;7159	989;990;1721;1722;1723;2466;2467;2468;5245;7192;7967;10808	1041;1042;1827;1828;1829;2666;2667;2668;5706;5707;7816;8644;11682	1042;1827;2667;5707;7816;8644;11682	288;289	160;218
Q8WUD6	Q8WUD6	5	5	1	Cholinephosphotransferase 1	CHPT1	sp|Q8WUD6|CHPT1_HUMAN Cholinephosphotransferase 1 OS=Homo sapiens OX=9606 GN=CHPT1 PE=1 SV=1	1	5	5	1	2020-05-13	2020-05-13	2020-09-03	45096	406	406	0	33984	218110000	19829000	6				919	33;357;2492;3961;5465	True;True;True;True;True	37;385;2658;4192;5845	91;569;4139;6390;8866;8867	95;589;4496;6928;9592;9593	95;589;4496;6928;9592
Q8N138-4;Q8N138;J3KTF9;J3QRM9	Q8N138-4;Q8N138;J3KTF9;J3QRM9	4;4;3;2	2;2;1;1	2;2;1;1	ORM1-like protein 3	ORMDL3	sp|Q8N138-4|ORML3_HUMAN Isoform 2 of ORM1-like protein 3 OS=Homo sapiens OX=9606 GN=ORMDL3;sp|Q8N138|ORML3_HUMAN ORM1-like protein 3 OS=Homo sapiens OX=9606 GN=ORMDL3 PE=1 SV=1;tr|J3KTF9|J3KTF9_HUMAN ORM1-like protein 3 (Fragment) OS=Homo sapiens OX=9606 G	4	4	2	2	2020-09-29	2020-08-16	2020-08-16	15689	137	137;153;102;129	0	33457	158340000	19792000	2				872	2337;2691;3723;4154	False;False;True;True	2496;2866;3944;4448	3913;4540;6068;6820	4263;4966;6594;7405	4263;4966;6594;7405
Q9Y3P4	Q9Y3P4	2	2	2	Rhomboid domain-containing protein 3	RHBDD3	sp|Q9Y3P4|RHBD3_HUMAN Rhomboid domain-containing protein 3 OS=Homo sapiens OX=9606 GN=RHBDD3 PE=2 SV=1	1	2	2	2	2020-07-04	2020-07-04	2020-07-04	40484	386	386	0	13349	197220000	19722000	3				1134	2133;3771	True;True	2277;3993	3375;6129	3619;3620;6655	3620;6655
A0A087WZA9;A0A024R4K9;A0A087X266;Q9BXJ8-2;Q9BXJ8;A0A087WV11	A0A087WZA9;A0A024R4K9;A0A087X266;Q9BXJ8-2;Q9BXJ8	4;4;4;4;4;1	4;4;4;4;4;1	4;4;4;4;4;1	Transmembrane protein 120A	TMEM120A;TMPIT	tr|A0A087WZA9|A0A087WZA9_HUMAN Transmembrane protein 120A (Fragment) OS=Homo sapiens OX=9606 GN=TMEM120A PE=1 SV=1;tr|A0A024R4K9|A0A024R4K9_HUMAN Transmembrane protein 120A OS=Homo sapiens OX=9606 GN=TMEM120A PE=1 SV=1;tr|A0A087X266|A0A087X266_HUMAN Transm	6	4	4	4	2020-02-28	2020-02-28	2020-02-28	20459	174	174;322;369;322;343;229	0	25928	255570000	19659000	4				1	663;1854;3747;4760	True;True;True;True	714;1981;3969;5102	1076;2949;6099;7740	1130;3163;6625;8394	1130;3163;6625;8394
A0A3F2YNX8;A0A0A0MRJ6;H7BY58;P22061;P22061-2;F6S8N6;H7C4X2;F8WDT3;F8WAV5;F8WAX2;C9J0F2	A0A3F2YNX8;A0A0A0MRJ6;H7BY58;P22061;P22061-2;F6S8N6	4;4;4;4;4;3;1;1;1;1;1	4;4;4;4;4;3;1;1;1;1;1	4;4;4;4;4;3;1;1;1;1;1	Protein-L-isoaspartate O-methyltransferase;Protein-L-isoaspartate(D-aspartate) O-methyltransferase	PCMT1	tr|A0A3F2YNX8|A0A3F2YNX8_HUMAN Protein-L-isoaspartate O-methyltransferase OS=Homo sapiens OX=9606 GN=PCMT1 PE=1 SV=1;tr|A0A0A0MRJ6|A0A0A0MRJ6_HUMAN Protein-L-isoaspartate O-methyltransferase OS=Homo sapiens OX=9606 GN=PCMT1 PE=1 SV=1;tr|H7BY58|H7BY58_HUMAN	11	4	4	4	2020-08-24	2020-08-24	2020-08-24	26361	250	250;285;286;227;228;250;38;62;66;72;96	0	26753	313850000	19616000	4				42	3041;4098;4202;5124	True;True;True;True	3235;4363;4507;5488	5046;6627;6884;8289;8290;8291	5493;7183;7470;8971;8972;8973	5493;7183;7470;8972
Q9GZR5	Q9GZR5	5	5	5	Elongation of very long chain fatty acids protein 4	ELOVL4	sp|Q9GZR5|ELOV4_HUMAN Elongation of very long chain fatty acids protein 4 OS=Homo sapiens OX=9606 GN=ELOVL4 PE=1 SV=1	1	5	5	5	22	22	22	36829	314	314	0	40038	271760000	19411000	5				1027	2209;2359;4828;5486;6546	True;True;True;True;True	2357;2518;5172;5867;6990	3536;3939;7874;8899;10578	3816;4291;8542;9625;9626;11443	3816;4291;8542;9625;11443
Q96A49	Q96A49	6	6	6	Synapse-associated protein 1	SYAP1	sp|Q96A49|SYAP1_HUMAN Synapse-associated protein 1 OS=Homo sapiens OX=9606 GN=SYAP1 PE=1 SV=1	1	6	6	6	2020-04-22	2020-04-22	2020-04-22	39933	352	352	0	110.41	361830000	19044000	8				950	815;1437;1463;1964;2968;4877	True;True;True;True;True;True	872;1534;1561;2102;3156;5222	1304;2391;2428;3137;3138;4921;7938;7939	1372;2587;2626;3359;3360;5366;8614;8615	1372;2587;2626;3360;5366;8614
F8VV32;A0A0B4J259;P61626	F8VV32;A0A0B4J259;P61626	3;3;3	3;3;3	3;3;3	Lysozyme;Lysozyme C	LYZ	tr|F8VV32|F8VV32_HUMAN Lysozyme OS=Homo sapiens OX=9606 GN=LYZ PE=1 SV=1;tr|A0A0B4J259|A0A0B4J259_HUMAN Lysozyme OS=Homo sapiens OX=9606 GN=LYZ PE=1 SV=1;sp|P61626|LYSC_HUMAN Lysozyme C OS=Homo sapiens OX=9606 GN=LYZ PE=1 SV=1	3	3	3	3	2020-09-27	2020-09-27	2020-09-27	11488	104	104;137;148	0	22472	169040000	18782000	5				53	534;5380;6496	True;True;True	575;5754;6937	865;866;867;8726;10517	902;903;904;9444;11380	903;9444;11380
Q8NBU5;Q8NBU5-2	Q8NBU5;Q8NBU5-2	9;7	9;7	9;7	ATPase family AAA domain-containing protein 1	ATAD1	sp|Q8NBU5|ATAD1_HUMAN ATPase family AAA domain-containing protein 1 OS=Homo sapiens OX=9606 GN=ATAD1 PE=1 SV=1;sp|Q8NBU5-2|ATAD1_HUMAN Isoform 2 of ATPase family AAA domain-containing protein 1 OS=Homo sapiens OX=9606 GN=ATAD1	2	9	9	9	26	26	26	40744	361	361;287	0	63058	505580000	18725000	9				894	730;733;1084;1822;2490;3766;4271;5370;6042	True;True;True;True;True;True;True;True;True	786;789;1158;1948;2656;3988;4587;5743;6457	1180;1185;1748;2912;4137;6124;7021;8700;8701;9766	1239;1244;1857;3125;4494;6650;7622;9411;9412;10575	1239;1244;1857;3125;4494;6650;7622;9412;10575
Q9NR77;F5GXM0;A0A087X249;F5H4N4;F5GZF7	Q9NR77;F5GXM0;A0A087X249;F5H4N4	4;3;2;2;1	4;3;2;2;1	4;3;2;2;1	Peroxisomal membrane protein 2	PXMP2	sp|Q9NR77|PXMP2_HUMAN Peroxisomal membrane protein 2 OS=Homo sapiens OX=9606 GN=PXMP2 PE=1 SV=3;tr|F5GXM0|F5GXM0_HUMAN Peroxisomal membrane protein 2 (Fragment) OS=Homo sapiens OX=9606 GN=PXMP2 PE=1 SV=2;tr|A0A087X249|A0A087X249_HUMAN Peroxisomal membrane	5	4	4	4	2020-02-27	2020-02-27	2020-02-27	22252	195	195;227;83;160;49	0	28901	223940000	18661000	6				1056	76;2123;5198;6448	True;True;True;True	82;2267;5564;6888	146;147;3364;8401;10458;10459	151;152;3608;9090;11318;11319	151;3608;9090;11318
A0PK00;H0YG77	A0PK00;H0YG77	2;1	2;1	2;1	Transmembrane protein 120B	TMEM120B	sp|A0PK00|T120B_HUMAN Transmembrane protein 120B OS=Homo sapiens OX=9606 GN=TMEM120B PE=1 SV=1;tr|H0YG77|H0YG77_HUMAN Transmembrane protein 120B (Fragment) OS=Homo sapiens OX=9606 GN=TMEM120B PE=1 SV=1	2	2	2	2	2020-01-09	2020-01-09	2020-01-09	40245	339	339;247	0	39068	351250000	18487000	2				114	1231;1662	True;True	1317;1778	1935;2706	2051;2917	2051;2917
Q9GZT3-2;Q9GZT3;H0YJW7;A0A087WUN7;H0YJ40;G3V4X6;G3V2S9;H0YJ07;H0YJU7	Q9GZT3-2;Q9GZT3;H0YJW7;A0A087WUN7;H0YJ40;G3V4X6;G3V2S9	3;3;2;2;2;2;2;1;1	3;3;2;2;2;2;2;1;1	3;3;2;2;2;2;2;1;1	SRA stem-loop-interacting RNA-binding protein, mitochondrial	SLIRP	sp|Q9GZT3-2|SLIRP_HUMAN Isoform 2 of SRA stem-loop-interacting RNA-binding protein, mitochondrial OS=Homo sapiens OX=9606 GN=SLIRP;sp|Q9GZT3|SLIRP_HUMAN SRA stem-loop-interacting RNA-binding protein, mitochondrial OS=Homo sapiens OX=9606 GN=SLIRP PE=1 SV=1	9	3	3	3	2020-08-30	2020-08-30	2020-08-30	12122	107	107;109;76;92;96;98;124;56;72	0	19207	184040000	18404000	3				1028	1333;2206;3724	True;True;True	1426;2354;3945	2251;3532;6069	2445;3812;6595	2445;3812;6595
P62879;C9JIS1;C9JXA5;E7EP32;C9JZN1;P62879-2;B3KVK2	P62879;C9JIS1;C9JXA5;E7EP32;C9JZN1	5;4;4;4;3;2;1	5;4;4;4;3;2;1	2;2;2;1;1;1;0	Guanine nucleotide-binding protein G(I)/G(S)/G(T) subunit beta-2	GNB2	sp|P62879|GBB2_HUMAN Guanine nucleotide-binding protein G(I)/G(S)/G(T) subunit beta-2 OS=Homo sapiens OX=9606 GN=GNB2 PE=1 SV=3;tr|C9JIS1|C9JIS1_HUMAN Guanine nucleotide-binding protein G(I)/G(S)/G(T) subunit beta-2 (Fragment) OS=Homo sapiens OX=9606 GN=GN	7	5	5	2	2020-04-17	2020-04-17	2020-01-09	37331	340	340;232;251;296;152;240;240	0	48403	331050000	18392000	5				712	89;236;3470;5576;6044	True;True;True;True;True	96;257;3682;5964;6459	162;364;5685;9114;9770	167;378;6188;9889;10579	167;378;6188;9889;10579
P05090;C9JF17;C9JX71	P05090;C9JF17;C9JX71	2;2;1	2;2;1	2;2;1	Apolipoprotein D	APOD	sp|P05090|APOD_HUMAN Apolipoprotein D OS=Homo sapiens OX=9606 GN=APOD PE=1 SV=1;tr|C9JF17|C9JF17_HUMAN Apolipoprotein D (Fragment) OS=Homo sapiens OX=9606 GN=APOD PE=1 SV=1;tr|C9JX71|C9JX71_HUMAN Apolipoprotein D (Fragment) OS=Homo sapiens OX=9606 GN=APOD	3	2	2	2	2020-06-10	2020-06-10	2020-06-10	21275	189	189;215;149	0	12179	183890000	18389000	2				177	4419;6165	True;True	4747;6585	7269;9962	7897;10789	7897;10789
Q9H553-2;Q9H553	Q9H553-2;Q9H553	6;6	6;6	6;6	Alpha-1,3/1,6-mannosyltransferase ALG2	ALG2	sp|Q9H553-2|ALG2_HUMAN Isoform 2 of Alpha-1,3/1,6-mannosyltransferase ALG2 OS=Homo sapiens OX=9606 GN=ALG2;sp|Q9H553|ALG2_HUMAN Alpha-1,3/1,6-mannosyltransferase ALG2 OS=Homo sapiens OX=9606 GN=ALG2 PE=1 SV=1	2	6	6	6	2020-07-25	2020-07-25	2020-07-25	37017	323	323;416	0	52744	330040000	18336000	7				1041	531;1853;2798;4217;5245;6136	True;True;True;True;True;True	569;570;1980;2975;4526;5611;6555	859;860;2948;4695;6925;8546;9892	895;896;3162;5135;7518;9256;10703	895;3162;5135;7518;9256;10703	511;512	194;293
CON__Q03247	CON__Q03247	3	3	2				1	3	3	2	2020-09-07	2020-09-07	2020-01-05	35979	316	316	0	18167	402750000	18307000	2			+	205	3295;3739;5963	True;True;True	3500;3961;6372	5411;6091;9657	5877;6617;10464	5877;6617;10464
P63218	P63218	2	2	2	Guanine nucleotide-binding protein G(I)/G(S)/G(O) subunit gamma-5	GNG5	sp|P63218|GBG5_HUMAN Guanine nucleotide-binding protein G(I)/G(S)/G(O) subunit gamma-5 OS=Homo sapiens OX=9606 GN=GNG5 PE=1 SV=3	1	2	2	2	2020-05-23	2020-05-23	2020-05-23	73184	68	68	0	11149	109280000	18213000	2				716	3281;6328	True;True	3485;6759	5389;10248	5855;11088	5855;11088
E9PC52;Q16576;Q16576-2;Q5JP01;Q5JP02;C9J7L0	E9PC52;Q16576;Q16576-2;Q5JP01	7;7;7;4;3;1	7;7;7;4;3;1	4;4;4;3;1;1	Histone-binding protein RBBP7	RBBP7	tr|E9PC52|E9PC52_HUMAN Histone-binding protein RBBP7 OS=Homo sapiens OX=9606 GN=RBBP7 PE=1 SV=1;sp|Q16576|RBBP7_HUMAN Histone-binding protein RBBP7 OS=Homo sapiens OX=9606 GN=RBBP7 PE=1 SV=1;sp|Q16576-2|RBBP7_HUMAN Isoform 2 of Histone-binding protein RBBP	6	7	7	4	2020-05-18	2020-05-18	2020-02-13	46938	416	416;425;469;285;175;67	0	47126	321830000	17879000	7				251	2530;3443;3650;5813;6047;6092;6722	True;True;True;True;True;True;True	2698;3655;3868;6216;6462;6509;7184	4240;5650;5973;9471;9773;9840;10835	4624;6152;6497;10271;10582;10651;11710	4624;6152;6497;10271;10582;10651;11710	103	123
Q13200;Q13200-3;Q13200-2;H7C1H2;C9JPC0;H7C2Q3;F8WBS8	Q13200;Q13200-3;Q13200-2	19;15;14;5;5;3;1	19;15;14;5;5;3;1	19;15;14;5;5;3;1	26S proteasome non-ATPase regulatory subunit 2	PSMD2	sp|Q13200|PSMD2_HUMAN 26S proteasome non-ATPase regulatory subunit 2 OS=Homo sapiens OX=9606 GN=PSMD2 PE=1 SV=3;sp|Q13200-3|PSMD2_HUMAN Isoform 3 of 26S proteasome non-ATPase regulatory subunit 2 OS=Homo sapiens OX=9606 GN=PSMD2;sp|Q13200-2|PSMD2_HUMAN Iso	7	19	19	19	2020-02-29	2020-02-29	2020-02-29	100.2	908	908;778;749;203;217;143;59	0	192.24	1072500000	17876000	22				749	149;436;582;882;1222;1383;1523;1665;1678;1783;2062;3185;3202;3676;3916;4135;4798;5642;6633	True;True;True;True;True;True;True;True;True;True;True;True;True;True;True;True;True;True;True	162;473;628;942;1308;1477;1631;1782;1796;1908;2203;3386;3403;3897;4145;4413;5142;6032;7084	254;255;720;973;1407;1925;2319;2523;2710;2725;2726;2864;3264;3265;5276;5299;6008;6330;6695;7817;9204;9205;10718	268;269;750;1025;1483;2041;2513;2724;2921;2936;2937;3076;3488;3489;5740;5765;6533;6868;7270;8476;9985;9986;11590	268;750;1025;1483;2041;2513;2724;2921;2936;3076;3489;5740;5765;6533;6868;7270;8476;9985;11590
Q9NRX6	Q9NRX6	2	2	2	Protein kish-B	TMEM167B	sp|Q9NRX6|KISHB_HUMAN Protein kish-B OS=Homo sapiens OX=9606 GN=TMEM167B PE=3 SV=1	1	2	2	2	2020-03-20	2020-03-20	2020-03-20	82941	74	74	0.0011274	10822	88617000	17723000	2				1062	2387;5858	True;True	2550;6262	3992;9529	4347;10333	4347;10333
Q9UHG3-2;Q9UHG3;C9JM55;C9K055;F8W8W4;C9JGT6	Q9UHG3-2;Q9UHG3;C9JM55;C9K055;F8W8W4	4;4;2;2;2;1	4;4;2;2;2;1	4;4;2;2;2;1	Prenylcysteine oxidase 1	PCYOX1	sp|Q9UHG3-2|PCYOX_HUMAN Isoform 2 of Prenylcysteine oxidase 1 OS=Homo sapiens OX=9606 GN=PCYOX1;sp|Q9UHG3|PCYOX_HUMAN Prenylcysteine oxidase 1 OS=Homo sapiens OX=9606 GN=PCYOX1 PE=1 SV=3;tr|C9JM55|C9JM55_HUMAN Prenylcysteine oxidase 1 (Fragment) OS=Homo sa	6	4	4	4	2020-04-11	2020-04-11	2020-04-11	48506	428	428;505;154;209;293;129	0	39781	403850000	17559000	6				1107	692;1386;1860;6762	True;True;True;True	744;1480;1987;7226	1110;1111;2322;2957;10895;10896	1165;1166;2516;3171;11772;11773	1165;2516;3171;11773
K7ERW7	K7ERW7	1	1	1		SGK494	tr|K7ERW7|K7ERW7_HUMAN Uncharacterized protein (Fragment) OS=Homo sapiens OX=9606 GN=SGK494 PE=4 SV=1	1	1	1	1	2020-08-09	2020-08-09	2020-08-09	10213	92	92	1	-2	69866000	17467000	1	+			400	4063	True	4320	6571	7125	7125	136	50
Q99614;H0YB37;REV__Q9BYX2-6;REV__Q9BYX2-5;REV__Q9BYX2-4;REV__Q9BYX2-2;REV__Q9BYX2	Q99614;H0YB37	4;3;1;1;1;1;1	4;3;1;1;1;1;1	4;3;1;1;1;1;1	Tetratricopeptide repeat protein 1	TTC1	sp|Q99614|TTC1_HUMAN Tetratricopeptide repeat protein 1 OS=Homo sapiens OX=9606 GN=TTC1 PE=1 SV=1;tr|H0YB37|H0YB37_HUMAN Tetratricopeptide repeat protein 1 (Fragment) OS=Homo sapiens OX=9606 GN=TTC1 PE=1 SV=1	7	4	4	4	2020-07-14	2020-07-14	2020-07-14	33526	292	292;163;468;502;710;917;928	0	28514	381590000	17345000	5				987	922;1009;1248;4951	True;True;True;True	984;1079;1335;5298	1460;1650;1651;1957;8048	1536;1753;1754;2077;8728	1536;1753;2077;8728
P28066;P28066-2	P28066;P28066-2	5;3	5;3	5;3	Proteasome subunit alpha type-5	PSMA5	sp|P28066|PSA5_HUMAN Proteasome subunit alpha type-5 OS=Homo sapiens OX=9606 GN=PSMA5 PE=1 SV=3;sp|P28066-2|PSA5_HUMAN Isoform 2 of Proteasome subunit alpha type-5 OS=Homo sapiens OX=9606 GN=PSMA5	2	5	5	5	2020-08-27	2020-08-27	2020-08-27	26411	241	241;183	0	36315	275410000	17213000	5				605	267;2270;2371;3348;5359	True;True;True;True;True	289;2423;2532;3556;5732	416;3641;3955;5522;8689	434;3939;4307;6021;9400	434;3939;4307;6021;9400
Q8TEQ8;Q8TEQ8-2	Q8TEQ8;Q8TEQ8-2	14;8	14;8	14;8	GPI ethanolamine phosphate transferase 3	PIGO	sp|Q8TEQ8|PIGO_HUMAN GPI ethanolamine phosphate transferase 3 OS=Homo sapiens OX=9606 GN=PIGO PE=1 SV=3;sp|Q8TEQ8-2|PIGO_HUMAN Isoform 2 of GPI ethanolamine phosphate transferase 3 OS=Homo sapiens OX=9606 GN=PIGO	2	14	14	14	2020-05-18	2020-05-18	2020-05-18	118.7	1089	1089;672	0	105.55	888380000	17084000	15				915	173;365;551;1515;1848;2012;2518;3172;3421;3835;4871;5296;6406;6503	True;True;True;True;True;True;True;True;True;True;True;True;True;True	189;394;593;1623;1975;2150;2685;3373;3632;4060;5216;5667;6839;6944	283;579;893;2513;2943;3195;3196;4224;5254;5617;6207;7930;8609;10361;10524	297;599;931;2714;3157;3417;3418;4608;5717;6118;6734;8606;9319;11211;11387	297;599;931;2714;3157;3418;4608;5717;6118;6734;8606;9319;11211;11387
[truncated: 688 more rows]

## Sheet: iBAQ_hEMC_nanodiscs
Protein IDs	Majority protein IDs	Peptide counts (all)	Peptide counts (razor+unique)	Peptide counts (unique)	Protein names	Gene names	Fasta headers	Number of proteins	Peptides	Razor + unique peptides	Unique peptides	Peptides EMC nanodiscs_PBS	Razor + unique peptides EMC nanodiscs_PBS	Unique peptides EMC nanodiscs_PBS	Sequence coverage [%]	Unique + razor sequence coverage [%]	Unique sequence coverage [%]	Mol. weight [kDa]	Sequence length	Sequence lengths	Q-value	Score	Sequence coverage EMC nanodiscs_PBS [%]	Intensity	Intensity EMC nanodiscs	iBAQ	iBAQ EMC nanodiscs	MS/MS count	Only identified by site	Reverse	Potential contaminant	id	Peptide IDs	Peptide is razor	Mod. peptide IDs	Evidence IDs	MS/MS IDs	Best MS/MS	Oxidation (M) site IDs	Oxidation (M) site positions
[truncated: 1,995 more rows]
