# Supplementary material for: Structural and mechanistic basis of the EMC-dependent biogenesis of distinct transmembrane clients
Source: eLife. 2020 Nov 25;9:e62611. doi: 10.7554/eLife.62611 (PMC7785296; doi:10.7554/eLife.62611)
Supplement: Supplementary file 2. — Table listing p-values for membrane controls (Sheet 1; relates to Figure 1—figure supplement 3) and flow cytometry for each of the three client reporters (Sheets 2, 3 and 4; relates to Main Figures 3 and 5–7 and figures supplements to those figures). [file elife-62611-supp2.xlsx]

## Sheet: mCherry reporter P-values
Decrease
P-value cutoff for significance = 0.01
Client reporter	Human EMC (hEMC) subunit	Mutation in hEMC subunit	P value	Significant Decrease
mCherry-P2A-GFP	hEMC1	hEMC1 knockout	0.9958	No
mCherry-P2A-GFP	hEMC2	hEMC2 knockout	0.9935	No
mCherry-P2A-GFP	hEMC3	hEMC3 knockout	0.9991	No
mCherry-P2A-GFP	hEMC5	hEMC5 knockout	0.9992	No
mCherry-P2A-GFP	WT	None	0.9903	No

## Sheet: SQS reporter P-values 
Increase						Decrease
P-value cutoff for significance = 0.01						P-value cutoff for significance = 0.01
Client reporter	Human EMC (hEMC) subunit	Mutation in hEMC subunit	P value	Significant Increase		Client reporter	Human EMC (hEMC) subunit	Mutation in hEMC subunit	P value	Significant Decrease
GFP-p2a-mCherry-SQS-opsin	hEMC3	V118A+I122A	0	Yes		GFP-p2a-mCherry-SQS-opsin	hEMC3	V118A+I122A	1	No
GFP-p2a-mCherry-SQS-opsin	hEMC1	F473Y+R487K	0	Yes		GFP-p2a-mCherry-SQS-opsin	hEMC1	F473Y+R487K	1	No
GFP-p2a-mCherry-SQS-opsin	hEMC5	K7A	0.0085	Yes		GFP-p2a-mCherry-SQS-opsin	hEMC5	K7A	1	No
GFP-p2a-mCherry-SQS-opsin	hEMC2	R80E+R81E+K90E+R112E	0.7695	No		GFP-p2a-mCherry-SQS-opsin	hEMC2	R80E+R81E+K90E+R112E	1	No
GFP-p2a-mCherry-SQS-opsin	hEMC2	N137A+N167A	0	Yes		GFP-p2a-mCherry-SQS-opsin	hEMC2	N137A+N167A	1	No
GFP-p2a-mCherry-SQS-opsin	hEMC2	K18A+K21A	0	Yes		GFP-p2a-mCherry-SQS-opsin	hEMC2	K18A+K21A	1	No
GFP-p2a-mCherry-SQS-opsin	hEMC2	R266A+Q269A+R273A	0	Yes		GFP-p2a-mCherry-SQS-opsin	hEMC2	R266A+Q269A+R273A	1	No
GFP-p2a-mCherry-SQS-opsin	hEMC2	E168A+D170A+K173A	0	Yes		GFP-p2a-mCherry-SQS-opsin	hEMC2	E168A+D170A+K173A	1	No
GFP-p2a-mCherry-SQS-opsin	hEMC1	T82A	0	Yes		GFP-p2a-mCherry-SQS-opsin	hEMC1	T82A	1	No
GFP-p2a-mCherry-SQS-opsin	hEMC5	I63L	0	Yes		GFP-p2a-mCherry-SQS-opsin	hEMC5	I63L	1	No
GFP-p2a-mCherry-SQS-opsin	hEMC3	R180A	1	No		GFP-p2a-mCherry-SQS-opsin	hEMC3	R180A	0	Yes
GFP-p2a-mCherry-SQS-opsin	hEMC1	R275E+R404E	0.0012	Yes		GFP-p2a-mCherry-SQS-opsin	hEMC1	R275E+R404E	1	No
GFP-p2a-mCherry-SQS-opsin	hEMC2	E146A+E149A+Q150A	0	Yes		GFP-p2a-mCherry-SQS-opsin	hEMC2	E146A+E149A+Q150A	1	No
GFP-p2a-mCherry-SQS-opsin	hEMC1	G71S	0	Yes		GFP-p2a-mCherry-SQS-opsin	hEMC1	G71S	1	No
GFP-p2a-mCherry-SQS-opsin	hEMC1	R69D	0	Yes		GFP-p2a-mCherry-SQS-opsin	hEMC1	R69D	1	No
GFP-p2a-mCherry-SQS-opsin	hEMC2	K248E+D252K+K255E	0	Yes		GFP-p2a-mCherry-SQS-opsin	hEMC2	K248E+D252K+K255E	1	No
GFP-p2a-mCherry-SQS-opsin	hEMC3	R147E	0.9994	No		GFP-p2a-mCherry-SQS-opsin	hEMC3	R147E	0.8752	No
GFP-p2a-mCherry-SQS-opsin	hEMC5	D44K	0	Yes		GFP-p2a-mCherry-SQS-opsin	hEMC5	D44K	1	No
GFP-p2a-mCherry-SQS-opsin	hEMC1	A144T	0	Yes		GFP-p2a-mCherry-SQS-opsin	hEMC1	A144T	1	No
GFP-p2a-mCherry-SQS-opsin	hEMC1	R881C	0	Yes		GFP-p2a-mCherry-SQS-opsin	hEMC1	R881C	1	No
GFP-p2a-mCherry-SQS-opsin	hEMC5	D82A+R85A	0	Yes		GFP-p2a-mCherry-SQS-opsin	hEMC5	D82A+R85A	1	No
GFP-p2a-mCherry-SQS-opsin	hEMC1	K951A+K957A	0.0017	Yes		GFP-p2a-mCherry-SQS-opsin	hEMC1	K951A+K957A	1	No
GFP-p2a-mCherry-SQS-opsin	hEMC1	T82M	0	Yes		GFP-p2a-mCherry-SQS-opsin	hEMC1	T82M	1	No
GFP-p2a-mCherry-SQS-opsin	hEMC2	Q269A+E286A+E290A	0	Yes		GFP-p2a-mCherry-SQS-opsin	hEMC2	Q269A+E286A+E290A	1	No
GFP-p2a-mCherry-SQS-opsin	hEMC3	K244A+H247A+E249A	0	Yes		GFP-p2a-mCherry-SQS-opsin	hEMC3	K244A+H247A+E249A	1	No
GFP-p2a-mCherry-SQS-opsin	hEMC5	A18L	0	Yes		GFP-p2a-mCherry-SQS-opsin	hEMC5	A18L	1	No
GFP-p2a-mCherry-SQS-opsin	hEMC1	D31K	0	Yes		GFP-p2a-mCherry-SQS-opsin	hEMC1	D31K	1	No
GFP-p2a-mCherry-SQS-opsin	hEMC1	G868R	0	Yes		GFP-p2a-mCherry-SQS-opsin	hEMC1	G868R	1	No
GFP-p2a-mCherry-SQS-opsin	hEMC1	H93D+E138D+N282K	0	Yes		GFP-p2a-mCherry-SQS-opsin	hEMC1	H93D+E138D+N282K	1	No
GFP-p2a-mCherry-SQS-opsin	hEMC3	K70Y	0	Yes		GFP-p2a-mCherry-SQS-opsin	hEMC3	K70Y	1	No
GFP-p2a-mCherry-SQS-opsin	hEMC5	E75A	0.0002	Yes		GFP-p2a-mCherry-SQS-opsin	hEMC5	E75A	1	No
GFP-p2a-mCherry-SQS-opsin	hEMC3	I186V+I182V	0.0003	Yes		GFP-p2a-mCherry-SQS-opsin	hEMC3	I186V+I182V	1	No
GFP-p2a-mCherry-SQS-opsin	hEMC1	G471R	0.0014	Yes		GFP-p2a-mCherry-SQS-opsin	hEMC1	G471R	1	No
GFP-p2a-mCherry-SQS-opsin	hEMC1	R76D+K80D	0.0289	No		GFP-p2a-mCherry-SQS-opsin	hEMC1	R76D+K80D	1	No
GFP-p2a-mCherry-SQS-opsin	hEMC5	F22L	0.0322	No		GFP-p2a-mCherry-SQS-opsin	hEMC5	F22L	1	No
GFP-p2a-mCherry-SQS-opsin	hEMC5	K7E	0.1199	No		GFP-p2a-mCherry-SQS-opsin	hEMC5	K7E	1	No
GFP-p2a-mCherry-SQS-opsin	hEMC5	R28A+R32A	0.2358	No		GFP-p2a-mCherry-SQS-opsin	hEMC5	R28A+R32A	1	No
GFP-p2a-mCherry-SQS-opsin	hEMC1	M483A+R487H+Q491N	0.9706	No		GFP-p2a-mCherry-SQS-opsin	hEMC1	M483A+R487H+Q491N	0.997	No
GFP-p2a-mCherry-SQS-opsin	hEMC3	E63K+D213K+E223K	1	No		GFP-p2a-mCherry-SQS-opsin	hEMC3	E63K+D213K+E223K	0	Yes
GFP-p2a-mCherry-SQS-opsin	hEMC3	K42A+K43A	1	No		GFP-p2a-mCherry-SQS-opsin	hEMC3	K42A+K43A	0.0224	No
GFP-p2a-mCherry-SQS-opsin	hEMC3	N114D+N117D	1	No		GFP-p2a-mCherry-SQS-opsin	hEMC3	N114D+N117D	0	Yes
GFP-p2a-mCherry-SQS-opsin	hEMC3	D9A	1	No		GFP-p2a-mCherry-SQS-opsin	hEMC3	D9A	0.0294	No
GFP-p2a-mCherry-SQS-opsin	hEMC3	M151L	1	No		GFP-p2a-mCherry-SQS-opsin	hEMC3	M151L	0	Yes
GFP-p2a-mCherry-SQS-opsin	hEMC5	H19L+S23A+Q26L	1	No		GFP-p2a-mCherry-SQS-opsin	hEMC5	H19L+S23A+Q26L	0.3655	No
GFP-p2a-mCherry-SQS-opsin	hEMC3	F148L	1	No		GFP-p2a-mCherry-SQS-opsin	hEMC3	F148L	0	Yes
GFP-p2a-mCherry-SQS-opsin	hEMC5	F90A	1	No		GFP-p2a-mCherry-SQS-opsin	hEMC5	F90A	0.2238	No
GFP-p2a-mCherry-SQS-opsin	hEMC2	K125E+R126D+K127E	1	No		GFP-p2a-mCherry-SQS-opsin	hEMC2	K125E+R126D+K127E	0	Yes
GFP-p2a-mCherry-SQS-opsin	hEMC3	R13E	1	No		GFP-p2a-mCherry-SQS-opsin	hEMC3	R13E	0	Yes
GFP-p2a-mCherry-SQS-opsin	hEMC3	R59E+R62E+K216E	1	No		GFP-p2a-mCherry-SQS-opsin	hEMC3	R59E+R62E+K216E	0	Yes

## Sheet: B1AR reporter P-values
Increase						Decrease
P-value cutoff for significance = 0.01						P-value cutoff for significance = 0.01
Client reporter	Human EMC (hEMC) subunit	Mutation in hEMC subunit	P value	Significant Increase		Client reporter	Human EMC (hEMC) subunit	Mutation in hEMC subunit	P value	Significant Decrease
B1AR-mCherry-P2A-GFP	hEMC3	V118A+I122A	0.5945	No		B1AR-mCherry-P2A-GFP	hEMC3	V118A+I122A	1	No
B1AR-mCherry-P2A-GFP	hEMC1	F473Y+R487K	0.9545	No		B1AR-mCherry-P2A-GFP	hEMC1	F473Y+R487K	0.9979	No
B1AR-mCherry-P2A-GFP	hEMC5	K7A	0.9743	No		B1AR-mCherry-P2A-GFP	hEMC5	K7A	0.9964	No
B1AR-mCherry-P2A-GFP	hEMC2	R80E+R81E+K90E+R112E	0.981	No		B1AR-mCherry-P2A-GFP	hEMC2	R80E+R81E+K90E+R112E	0.9951	No
B1AR-mCherry-P2A-GFP	hEMC2	N137A+N167A	0.9842	No		B1AR-mCherry-P2A-GFP	hEMC2	N137A+N167A	0.9925	No
B1AR-mCherry-P2A-GFP	hEMC2	K18A+K21A	0.9875	No		B1AR-mCherry-P2A-GFP	hEMC2	K18A+K21A	0.9943	No
B1AR-mCherry-P2A-GFP	hEMC2	R266A+Q269A+R273A	0.9885	No		B1AR-mCherry-P2A-GFP	hEMC2	R266A+Q269A+R273A	0.9919	No
B1AR-mCherry-P2A-GFP	hEMC2	E168A+D170A+K173A	0.9895	No		B1AR-mCherry-P2A-GFP	hEMC2	E168A+D170A+K173A	0.9931	No
B1AR-mCherry-P2A-GFP	hEMC1	T82A	0.9896	No		B1AR-mCherry-P2A-GFP	hEMC1	T82A	0.9908	No
B1AR-mCherry-P2A-GFP	hEMC5	I63L	0.9935	No		B1AR-mCherry-P2A-GFP	hEMC5	I63L	0.9852	No
B1AR-mCherry-P2A-GFP	hEMC3	R180A	0.9959	No		B1AR-mCherry-P2A-GFP	hEMC3	R180A	0.9852	No
B1AR-mCherry-P2A-GFP	hEMC1	R275E+R404E	0.9962	No		B1AR-mCherry-P2A-GFP	hEMC1	R275E+R404E	0.9537	No
B1AR-mCherry-P2A-GFP	hEMC2	E146A+E149A+Q150A	0.9964	No		B1AR-mCherry-P2A-GFP	hEMC2	E146A+E149A+Q150A	0.9668	No
B1AR-mCherry-P2A-GFP	hEMC1	G71S	0.9966	No		B1AR-mCherry-P2A-GFP	hEMC1	G71S	0.972	No
B1AR-mCherry-P2A-GFP	hEMC1	R69D	0.9972	No		B1AR-mCherry-P2A-GFP	hEMC1	R69D	0.93	No
B1AR-mCherry-P2A-GFP	hEMC2	K248E+D252K+K255E	0.998	No		B1AR-mCherry-P2A-GFP	hEMC2	K248E+D252K+K255E	0.9559	No
B1AR-mCherry-P2A-GFP	hEMC3	R147E	0.9983	No		B1AR-mCherry-P2A-GFP	hEMC3	R147E	0.9427	No
B1AR-mCherry-P2A-GFP	hEMC5	D44K	0.9986	No		B1AR-mCherry-P2A-GFP	hEMC5	D44K	0.948	No
B1AR-mCherry-P2A-GFP	hEMC1	A144T	0.9988	No		B1AR-mCherry-P2A-GFP	hEMC1	A144T	0.955	No
B1AR-mCherry-P2A-GFP	hEMC1	R881C	0.9991	No		B1AR-mCherry-P2A-GFP	hEMC1	R881C	0.9455	No
B1AR-mCherry-P2A-GFP	hEMC5	D82A+R85A	0.9994	No		B1AR-mCherry-P2A-GFP	hEMC5	D82A+R85A	0.9123	No
B1AR-mCherry-P2A-GFP	hEMC1	K951A+K957A	0.9995	No		B1AR-mCherry-P2A-GFP	hEMC1	K951A+K957A	0.9378	No
B1AR-mCherry-P2A-GFP	hEMC1	T82M	0.9998	No		B1AR-mCherry-P2A-GFP	hEMC1	T82M	0.8682	No
B1AR-mCherry-P2A-GFP	hEMC2	Q269A+E286A+E290A	0.9999	No		B1AR-mCherry-P2A-GFP	hEMC2	Q269A+E286A+E290A	0.6892	No
B1AR-mCherry-P2A-GFP	hEMC3	K244A+H247A+E249A	1	No		B1AR-mCherry-P2A-GFP	hEMC3	K244A+H247A+E249A	0.4127	No
B1AR-mCherry-P2A-GFP	hEMC5	A18L	1	No		B1AR-mCherry-P2A-GFP	hEMC5	A18L	0.5297	No
B1AR-mCherry-P2A-GFP	hEMC1	D31K	1	No		B1AR-mCherry-P2A-GFP	hEMC1	D31K	0.6313	No
B1AR-mCherry-P2A-GFP	hEMC1	G868R	1	No		B1AR-mCherry-P2A-GFP	hEMC1	G868R	0.6035	No
B1AR-mCherry-P2A-GFP	hEMC1	H93D+E138D+N282K	1	No		B1AR-mCherry-P2A-GFP	hEMC1	H93D+E138D+N282K	0.688	No
B1AR-mCherry-P2A-GFP	hEMC3	K70Y	1	No		B1AR-mCherry-P2A-GFP	hEMC3	K70Y	0.2568	No
B1AR-mCherry-P2A-GFP	hEMC5	E75A	1	No		B1AR-mCherry-P2A-GFP	hEMC5	E75A	0.4297	No
B1AR-mCherry-P2A-GFP	hEMC3	I182V+I186V	1	No		B1AR-mCherry-P2A-GFP	hEMC3	I182V+I186V	0.2469	No
B1AR-mCherry-P2A-GFP	hEMC1	G471R	1	No		B1AR-mCherry-P2A-GFP	hEMC1	G471R	0.2347	No
B1AR-mCherry-P2A-GFP	hEMC1	R76D+K80D	1	No		B1AR-mCherry-P2A-GFP	hEMC1	R76D+K80D	0.5089	No
B1AR-mCherry-P2A-GFP	hEMC5	F22L	1	No		B1AR-mCherry-P2A-GFP	hEMC5	F22L	0.7403	No
B1AR-mCherry-P2A-GFP	hEMC5	K7E	1	No		B1AR-mCherry-P2A-GFP	hEMC5	K7E	0.7593	No
B1AR-mCherry-P2A-GFP	hEMC5	R28A+R32A	1	No		B1AR-mCherry-P2A-GFP	hEMC5	R28A+R32A	0.5496	No
B1AR-mCherry-P2A-GFP	hEMC1	M483A+R487H+Q491N	1	No		B1AR-mCherry-P2A-GFP	hEMC1	M483A+R487H+Q491N	0.0101	No
B1AR-mCherry-P2A-GFP	hEMC3	E63K+D213K+E223K	1	No		B1AR-mCherry-P2A-GFP	hEMC3	E63K+D213K+E223K	0	Yes
B1AR-mCherry-P2A-GFP	hEMC3	K42A+K43A	1	No		B1AR-mCherry-P2A-GFP	hEMC3	K42A+K43A	0.7239	No
B1AR-mCherry-P2A-GFP	hEMC3	N114D+N117D	1	No		B1AR-mCherry-P2A-GFP	hEMC3	N114D+N117D	0.228	No
B1AR-mCherry-P2A-GFP	hEMC3	D9A	1	No		B1AR-mCherry-P2A-GFP	hEMC3	D9A	0.2909	No
B1AR-mCherry-P2A-GFP	hEMC3	M151L	1	No		B1AR-mCherry-P2A-GFP	hEMC3	M151L	0	Yes
B1AR-mCherry-P2A-GFP	hEMC5	H19L+S23A+Q26L	1	No		B1AR-mCherry-P2A-GFP	hEMC5	H19L+S23A+Q26L	0.0009	Yes
B1AR-mCherry-P2A-GFP	hEMC3	F148L	1	No		B1AR-mCherry-P2A-GFP	hEMC3	F148L	0	Yes
B1AR-mCherry-P2A-GFP	hEMC5	F90A	1	No		B1AR-mCherry-P2A-GFP	hEMC5	F90A	0.1899	No
B1AR-mCherry-P2A-GFP	hEMC2	K125E+R126D+K127E	1	No		B1AR-mCherry-P2A-GFP	hEMC2	K125E+R126D+K127E	0	Yes
B1AR-mCherry-P2A-GFP	hEMC3	R13E	1	No		B1AR-mCherry-P2A-GFP	hEMC3	R13E	0	Yes
B1AR-mCherry-P2A-GFP	hEMC3	R59E+R62E+K216E	1	No		B1AR-mCherry-P2A-GFP	hEMC3	R59E+R62E+K216E	0	Yes

## Sheet: TMEM97 reporter P-values
Increase						Decrease
P-value cutoff for significance = 0.01						P-value cutoff for significance = 0.01
Client reporter	Human EMC (hEMC) subunit	Mutation in hEMC subunit	P value	Significant Increase		Client reporter	Human EMC (hEMC) subunit	Mutation in hEMC subunit	P value	Significant Decrease
TMEM97-mCherry-P2A-GFP	hEMC3	V118A+I122A	0.9978	No		TMEM97-mCherry-P2A-GFP	hEMC3	V118A+I122A	0.9563	No
TMEM97-mCherry-P2A-GFP	hEMC1	F473Y+R487K	1	No		TMEM97-mCherry-P2A-GFP	hEMC1	F473Y+R487K	0	Yes
TMEM97-mCherry-P2A-GFP	hEMC5	K7A	0.9999	No		TMEM97-mCherry-P2A-GFP	hEMC5	K7A	0.8665	No
TMEM97-mCherry-P2A-GFP	hEMC2	R80E+R81E+K90E+R112E	0.7019	No		TMEM97-mCherry-P2A-GFP	hEMC2	R80E+R81E+K90E+R112E	0.9999	No
TMEM97-mCherry-P2A-GFP	hEMC2	N137A+N167A	0.9968	No		TMEM97-mCherry-P2A-GFP	hEMC2	N137A+N167A	0.9805	No
TMEM97-mCherry-P2A-GFP	hEMC2	K18A+K21A	0.9737	No		TMEM97-mCherry-P2A-GFP	hEMC2	K18A+K21A	0.9961	No
TMEM97-mCherry-P2A-GFP	hEMC2	R266A+Q269A+R273A	0.6252	No		TMEM97-mCherry-P2A-GFP	hEMC2	R266A+Q269A+R273A	1	No
TMEM97-mCherry-P2A-GFP	hEMC2	E168A+D170A+K173A	0.9374	No		TMEM97-mCherry-P2A-GFP	hEMC2	E168A+D170A+K173A	0.9996	No
TMEM97-mCherry-P2A-GFP	hEMC1	T82A	1	No		TMEM97-mCherry-P2A-GFP	hEMC1	T82A	0	Yes
TMEM97-mCherry-P2A-GFP	hEMC5	I63L	1	No		TMEM97-mCherry-P2A-GFP	hEMC5	I63L	0.6267	No
TMEM97-mCherry-P2A-GFP	hEMC3	R180A	0.9982	No		TMEM97-mCherry-P2A-GFP	hEMC3	R180A	0.9363	No
TMEM97-mCherry-P2A-GFP	hEMC1	R275E+R404E	1	No		TMEM97-mCherry-P2A-GFP	hEMC1	R275E+R404E	0.3556	No
TMEM97-mCherry-P2A-GFP	hEMC2	E146A+E149A+Q150A	0.8362	No		TMEM97-mCherry-P2A-GFP	hEMC2	E146A+E149A+Q150A	0.9995	No
TMEM97-mCherry-P2A-GFP	hEMC1	G71S	1	No		TMEM97-mCherry-P2A-GFP	hEMC1	G71S	0.0018	Yes
TMEM97-mCherry-P2A-GFP	hEMC1	R69D	1	No		TMEM97-mCherry-P2A-GFP	hEMC1	R69D	0	Yes
TMEM97-mCherry-P2A-GFP	hEMC2	K248E+D252K+K255E	0.9995	No		TMEM97-mCherry-P2A-GFP	hEMC2	K248E+D252K+K255E	0.9043	No
TMEM97-mCherry-P2A-GFP	hEMC3	R147E	0.9996	No		TMEM97-mCherry-P2A-GFP	hEMC3	R147E	0.8954	No
TMEM97-mCherry-P2A-GFP	hEMC5	D44K	0.9992	No		TMEM97-mCherry-P2A-GFP	hEMC5	D44K	0.9358	No
TMEM97-mCherry-P2A-GFP	hEMC1	A144T	1	No		TMEM97-mCherry-P2A-GFP	hEMC1	A144T	0.0033	Yes
TMEM97-mCherry-P2A-GFP	hEMC1	R881C	1	No		TMEM97-mCherry-P2A-GFP	hEMC1	R881C	0.0001	Yes
TMEM97-mCherry-P2A-GFP	hEMC5	D82A+R85A	0.9989	No		TMEM97-mCherry-P2A-GFP	hEMC5	D82A+R85A	0.9595	No
TMEM97-mCherry-P2A-GFP	hEMC1	K951A+K957A	1	No		TMEM97-mCherry-P2A-GFP	hEMC1	K951A+K957A	0.6294	No
TMEM97-mCherry-P2A-GFP	hEMC1	T82M	1	No		TMEM97-mCherry-P2A-GFP	hEMC1	T82M	0	Yes
TMEM97-mCherry-P2A-GFP	hEMC2	Q269A+E286A+E290A	0.9996	No		TMEM97-mCherry-P2A-GFP	hEMC2	Q269A+E286A+E290A	0.8878	No
TMEM97-mCherry-P2A-GFP	hEMC3	K244A+H247A+E249A	0.9651	No		TMEM97-mCherry-P2A-GFP	hEMC3	K244A+H247A+E249A	0.9977	No
TMEM97-mCherry-P2A-GFP	hEMC5	A18L	1	No		TMEM97-mCherry-P2A-GFP	hEMC5	A18L	0.4978	No
TMEM97-mCherry-P2A-GFP	hEMC1	D31K	1	No		TMEM97-mCherry-P2A-GFP	hEMC1	D31K	0	Yes
TMEM97-mCherry-P2A-GFP	hEMC1	G868R	1	No		TMEM97-mCherry-P2A-GFP	hEMC1	G868R	0.0001	Yes
TMEM97-mCherry-P2A-GFP	hEMC1	H93D+E138D+N282K	1	No		TMEM97-mCherry-P2A-GFP	hEMC1	H93D+E138D+N282K	0.014	No
TMEM97-mCherry-P2A-GFP	hEMC3	K70Y	1	No		TMEM97-mCherry-P2A-GFP	hEMC3	K70Y	0.4065	No
TMEM97-mCherry-P2A-GFP	hEMC5	E75A	1	No		TMEM97-mCherry-P2A-GFP	hEMC5	E75A	0.5016	No
TMEM97-mCherry-P2A-GFP	hEMC3	I182V+I186V	0.9646	No		TMEM97-mCherry-P2A-GFP	hEMC3	I182V+I186V	0.9962	No
TMEM97-mCherry-P2A-GFP	hEMC1	G471R	1	No		TMEM97-mCherry-P2A-GFP	hEMC1	G471R	0	Yes
TMEM97-mCherry-P2A-GFP	hEMC1	R76D+K80D	1	No		TMEM97-mCherry-P2A-GFP	hEMC1	R76D+K80D	0.0112	No
TMEM97-mCherry-P2A-GFP	hEMC5	F22L	1	No		TMEM97-mCherry-P2A-GFP	hEMC5	F22L	0.6564	No
TMEM97-mCherry-P2A-GFP	hEMC5	K7E	0.9999	No		TMEM97-mCherry-P2A-GFP	hEMC5	K7E	0.8348	No
TMEM97-mCherry-P2A-GFP	hEMC5	R28A+R32A	1	No		TMEM97-mCherry-P2A-GFP	hEMC5	R28A+R32A	0.0387	No
TMEM97-mCherry-P2A-GFP	hEMC1	M483A+R487H+Q491N	1	No		TMEM97-mCherry-P2A-GFP	hEMC1	M483A+R487H+Q491N	0.0048	Yes
TMEM97-mCherry-P2A-GFP	hEMC3	E63K+D213K+E223K	0.9722	No		TMEM97-mCherry-P2A-GFP	hEMC3	E63K+D213K+E223K	0.998	No
TMEM97-mCherry-P2A-GFP	hEMC3	K42A+K43A	0.9782	No		TMEM97-mCherry-P2A-GFP	hEMC3	K42A+K43A	0.9969	No
TMEM97-mCherry-P2A-GFP	hEMC3	N114D+N117D	0.9959	No		TMEM97-mCherry-P2A-GFP	hEMC3	N114D+N117D	0.9748	No
TMEM97-mCherry-P2A-GFP	hEMC3	D9A	0.9969	No		TMEM97-mCherry-P2A-GFP	hEMC3	D9A	0.974	No
TMEM97-mCherry-P2A-GFP	hEMC3	M151L	0.9981	No		TMEM97-mCherry-P2A-GFP	hEMC3	M151L	0.9738	No
TMEM97-mCherry-P2A-GFP	hEMC5	H19L+S23A+Q26L	0.9998	No		TMEM97-mCherry-P2A-GFP	hEMC5	H19L+S23A+Q26L	0.801	No
TMEM97-mCherry-P2A-GFP	hEMC3	F148L	1	No		TMEM97-mCherry-P2A-GFP	hEMC3	F148L	0.0031	Yes
TMEM97-mCherry-P2A-GFP	hEMC5	F90A	1	No		TMEM97-mCherry-P2A-GFP	hEMC5	F90A	0.1462	No
TMEM97-mCherry-P2A-GFP	hEMC2	K125E+R126D+K127E	1	No		TMEM97-mCherry-P2A-GFP	hEMC2	K125E+R126D+K127E	0	Yes
TMEM97-mCherry-P2A-GFP	hEMC3	R13E	1	No		TMEM97-mCherry-P2A-GFP	hEMC3	R13E	0	Yes
TMEM97-mCherry-P2A-GFP	hEMC3	R59E+R62E+K216E	1	No		TMEM97-mCherry-P2A-GFP	hEMC3	R59E+R62E+K216E	0.3643	No
