# Supplementary material for: Structural and mechanistic basis of the EMC-dependent biogenesis of distinct transmembrane clients
Source: eLife. 2020 Nov 25;9:e62611. doi: 10.7554/eLife.62611 (PMC7785296; doi:10.7554/eLife.62611)
Supplement: Supplementary file 3. — Table listing point mutagenesis performed on hEMC and yEMC and assayed against different client types. [file elife-62611-supp3.xlsx]

## Sheet: Mutants
				Client effect
Paper	Organism	Subunit	Mutation	Tail-anchor (SQS)	N-out/polytopic (b1AR)	N-in/polytopic (TMEM97)	N-out/polytopic (OPRK1)	others (see note)	Method	Notes
O'Donnell et al., 2020	Human	EMC2	H189E+L190E+Y191K	depletion					Fluorescent client reporter
O'Donnell et al., 2020	Human	EMC2	I61K+M95K+A129K	depletion					Fluorescent client reporter	assembly defect
O'Donnell et al., 2020	Human	EMC2	I61K+M95K+A122E	unchanged					Fluorescent client reporter
O'Donnell et al., 2020	Human	EMC2	H189E	unchanged					Fluorescent client reporter
O'Donnell et al., 2020	Human	EMC2	L190E	unchanged					Fluorescent client reporter
O'Donnell et al., 2020	Human	EMC2	Y191K	unchanged					Fluorescent client reporter
O'Donnell et al., 2020	Human	EMC2	I61K+M95K	unchanged					Fluorescent client reporter
O'Donnell et al., 2020	Human	EMC2	H189E+Y191K	unchanged					Fluorescent client reporter
O'Donnell et al., 2020	Human	EMC2	L190E+Y191K	unchanged					Fluorescent client reporter
O'Donnell et al., 2020	Human	EMC2	Q193E+Q194K	unchanged					Fluorescent client reporter
Pleiner et al., 2020	Human	EMC3	R180A	depletion			depletion		Fluorescent client reporter
Pleiner et al., 2020	Human	EMC3	R180E	depletion			depletion		Fluorescent client reporter
Pleiner et al., 2020	Human	EMC3	R180K	accumulation			depletion		Fluorescent client reporter
Pleiner et al., 2020	Human	EMC3	R31A	depletion			depletion		Fluorescent client reporter
Pleiner et al., 2020	Human	EMC3	R31E	depletion			depletion		Fluorescent client reporter
Pleiner et al., 2020	Human	EMC3	R31K	unchanged			depletion		Fluorescent client reporter
Pleiner et al., 2020	Human	EMC3	F173A	unchanged			unchanged		Fluorescent client reporter
Pleiner et al., 2020	Human	EMC3	M101S+M106S+M110S+M111S	depletion			depletion		Fluorescent client reporter
Pleiner et al., 2020	Human	EMC3	M198S+M199S+M203S+M208S+M210S	unchanged			unchanged		Fluorescent client reporter
Pleiner et al., 2020	Human	EMC6	T31A	depletion			depletion		Fluorescent client reporter
Pleiner et al., 2020	Human	EMC6	D27A	accumulation			depletion		Fluorescent client reporter
Bai et al., 2020	Yeast	EMC3	K26L					depletion	Fluorescence microscopy	Fet3 has cleavable signal sequence at N-terminus
Miller-Vedam et al., 2020	Human	EMC1	D31K	accumulation	unchanged	depletion			Fluorescent client reporter
Miller-Vedam et al., 2020	Human	EMC1	R69D	accumulation	unchanged	depletion			Fluorescent client reporter
Miller-Vedam et al., 2020	Human	EMC1	G71S	accumulation	unchanged	depletion			Fluorescent client reporter
Miller-Vedam et al., 2020	Human	EMC1	T82A	accumulation	unchanged	depletion			Fluorescent client reporter
Miller-Vedam et al., 2020	Human	EMC1	H93D+E138D+N282K	accumulation	unchanged	unchanged			Fluorescent client reporter
Miller-Vedam et al., 2020	Human	EMC1	F473Y+R487K	accumulation	unchanged	depletion			Fluorescent client reporter
Miller-Vedam et al., 2020	Human	EMC1	G868R	accumulation	unchanged	depletion			Fluorescent client reporter
Miller-Vedam et al., 2020	Human	EMC1	R881C	accumulation	unchanged	depletion			Fluorescent client reporter
Miller-Vedam et al., 2020	Human	EMC1	R76D+K80D	unchanged	unchanged	unchanged			Fluorescent client reporter
Miller-Vedam et al., 2020	Human	EMC1	K951A+K957A	accumulation	unchanged	unchanged			Fluorescent client reporter
Miller-Vedam et al., 2020	Human	EMC1	T82M	accumulation	unchanged	depletion			Fluorescent client reporter
Miller-Vedam et al., 2020	Human	EMC1	A144T	accumulation	unchanged	depletion			Fluorescent client reporter
Miller-Vedam et al., 2020	Human	EMC1	G471R	accumulation	unchanged	depletion			Fluorescent client reporter
Miller-Vedam et al., 2020	Human	EMC1	M483A+R487H+Q491N	unchanged	unchanged	depletion			Fluorescent client reporter
Miller-Vedam et al., 2020	Human	EMC1	R275E+R404E	accumulation	unchanged	unchanged			Fluorescent client reporter
Miller-Vedam et al., 2020	Human	EMC2	R80E+R81E+K90E+R112E	unchanged	unchanged	unchanged			Fluorescent client reporter
Miller-Vedam et al., 2020	Human	EMC2	K18A+K21A	accumulation	unchanged	unchanged			Fluorescent client reporter
Miller-Vedam et al., 2020	Human	EMC2	N137A+N167A	accumulation	unchanged	unchanged			Fluorescent client reporter
Miller-Vedam et al., 2020	Human	EMC2	E146A+E149A+Q150A	accumulation	unchanged	unchanged			Fluorescent client reporter
Miller-Vedam et al., 2020	Human	EMC2	E168A+D170A+K173A	accumulation	unchanged	unchanged			Fluorescent client reporter
Miller-Vedam et al., 2020	Human	EMC2	K248E+D252K+K255E	accumulation	unchanged	unchanged			Fluorescent client reporter
Miller-Vedam et al., 2020	Human	EMC2	R266A+Q269A+R273A	accumulation	unchanged	unchanged			Fluorescent client reporter
Miller-Vedam et al., 2020	Human	EMC2	K125E+R126D+K127E	depletion	depletion	depletion			Fluorescent client reporter	assembly defect
Miller-Vedam et al., 2020	Human	EMC2	Q269A+E286A+E290A	accumulation	unchanged	unchanged			Fluorescent client reporter
Miller-Vedam et al., 2020	Human	EMC3	R180A	depletion	unchanged	unchanged			Fluorescent client reporter
Miller-Vedam et al., 2020	Human	EMC3	R147E	unchanged	unchanged	unchanged			Fluorescent client reporter
Miller-Vedam et al., 2020	Human	EMC3	V118A+I122A	accumulation	unchanged	unchanged			Fluorescent client reporter
Miller-Vedam et al., 2020	Human	EMC3	E63K+D213K+E223K	depletion	depletion	unchanged			Fluorescent client reporter
Miller-Vedam et al., 2020	Human	EMC3	R59E+R62E+K216E	depletion	depletion	unchanged			Fluorescent client reporter
Miller-Vedam et al., 2020	Human	EMC3	M151L	depletion	depletion	unchanged			Fluorescent client reporter
Miller-Vedam et al., 2020	Human	EMC3	F148L	depletion	depletion	depletion			Fluorescent client reporter
Miller-Vedam et al., 2020	Human	EMC3	R13E	depletion	depletion	depletion			Fluorescent client reporter
Miller-Vedam et al., 2020	Human	EMC3	K42A+K43A	unchanged	unchanged	unchanged			Fluorescent client reporter
Miller-Vedam et al., 2020	Human	EMC3	N114D+N117D	depletion	unchanged	unchanged			Fluorescent client reporter
Miller-Vedam et al., 2020	Human	EMC3	D9A	unchanged	unchanged	unchanged			Fluorescent client reporter
Miller-Vedam et al., 2020	Human	EMC3	I182V+I186V	accumulation	unchanged	unchanged			Fluorescent client reporter
Miller-Vedam et al., 2020	Human	EMC3	K244A+H247A+E249A	accumulation	unchanged	unchanged			Fluorescent client reporter
Miller-Vedam et al., 2020	Human	EMC3	K70Y	accumulation	unchanged	unchanged			Fluorescent client reporter
Miller-Vedam et al., 2020	Human	EMC5	D82A+R85A	accumulation	unchanged	unchanged			Fluorescent client reporter
Miller-Vedam et al., 2020	Human	EMC5	I63L	accumulation	unchanged	unchanged			Fluorescent client reporter
Miller-Vedam et al., 2020	Human	EMC5	D44K	accumulation	unchanged	unchanged			Fluorescent client reporter
Miller-Vedam et al., 2020	Human	EMC5	K7A	accumulation	unchanged	unchanged			Fluorescent client reporter
Miller-Vedam et al., 2020	Human	EMC5	H19L+S23A+Q26L	unchanged	depletion	unchanged			Fluorescent client reporter
Miller-Vedam et al., 2020	Human	EMC5	F90A	unchanged	unchanged	unchanged			Fluorescent client reporter	assembly defect
Miller-Vedam et al., 2020	Human	EMC5	A18L	accumulation	unchanged	unchanged			Fluorescent client reporter
Miller-Vedam et al., 2020	Human	EMC5	F22L	unchanged	unchanged	unchanged			Fluorescent client reporter
Miller-Vedam et al., 2020	Human	EMC5	E75A	accumulation	unchanged	unchanged			Fluorescent client reporter
Miller-Vedam et al., 2020	Human	EMC5	K7E	unchanged	unchanged	unchanged			Fluorescent client reporter
Miller-Vedam et al., 2020	Human	EMC5	R28A+R32A	unchanged	unchanged	unchanged			Fluorescent client reporter
