# Supplementary material for: Structural and mechanistic basis of the EMC-dependent biogenesis of distinct transmembrane clients
Source: eLife. 2020 Nov 25;9:e62611. doi: 10.7554/eLife.62611 (PMC7785296; doi:10.7554/eLife.62611)
Supplement: Supplementary file 5. — Table listing sequences of point mutagenesis plasmids used in the hEMC functional assay in this study. [file elife-62611-supp5.xlsx]

## Sheet: Template
Supplementary File 5
Reagent type (species) or resource	Designation	Source or reference	Identifiers	Additional information
sequence-based reagent	pKDP110	this study	bAR1_mCherry_P2A_GFP	gttgttctttttaacttcaggcgggttacaatagtttccagtaagtattctggaggctgcatccatgacacaggcaaacctgagcgaaaccctgttcaaaccccgctttaaacatcctgaaacctcgacgctagtccgccgctttaatcacggcgcacaaccgcctgtgcagtcggcccttgatggtaaaaccatccctcactggtatcgcatgattaaccgtctgatgtggatctggcgcggcattgacccacgcgaaatcctcgacgtccaggcacgtattgtgatgagcgatgccgaacgtaccgacgatgatttatacgatacggtgattggctaccgtggcggcaactggatttatgagtgggccccggatctttgtgaaggaaccttacttct…
sequence-based reagent	pKDP111	this study	TMEM97_mCherry_P2A_GFP	ttcaggcgggttacaatagtttccagtaagtattctggaggctgcatccatgacacaggcaaacctgagcgaaaccctgttcaaaccccgctttaaacatcctgaaacctcgacgctagtccgccgctttaatcacggcgcacaaccgcctgtgcagtcggcccttgatggtaaaaccatccctcactggtatcgcatgattaaccgtctgatgtggatctggcgcggcattgacccacgcgaaatcctcgacgtccaggcacgtattgtgatgagcgatgccgaacgtaccgacgatgatttatacgatacggtgattggctaccgtggcggcaactggatttatgagtgggccccggatctttgtgaaggaaccttacttctgtggtgtgacataat…
sequence-based reagent	pKDP136	this study	GFP_P2A_mCherry_SQS_TMD_opsintag	gtgcttcaagtagtgtgtgcccgtctgttgtgtgactctggtaactagagatccctcagacccttttagtcagtgtggaaaatctctagcagcatctagaattaattccgtgtattctatagtgtcacctaaatcgtatgtgtatgatacataaggttatgtattaattgtagccgcgttctaacgacaatatgtacaagcctaattgtgtagcatctggcttactgaagcagaccctatcatctctctcgtaaactgccgtcagagtcggtttggttggacgaaccttctgagtttctggtaacgccgtcccgcacccggaaatggtcagcgaaccaatcagcagggtcatcgctagccagatcctctacgccggacgcatcgtggccggcatcaccg…
sequence-based reagent	pKDP119_hsEMC1_mut_D31K	Twist	hsEMC1_mut_D31K	GGATCCGGTGCATGCGCTCGCATCATGGCGGCTGAGTGGGCTTCTCGTTTCTGGCTTTGGGCTACGCTGCTGATTCCTGCGGCCGCGGTCTACGAAGACCAAGTGGGCAAGTTTAAGTGGAGACAGCAATATGTTGGGAAGGTCAAGTTTGCCTCCTTGGAATTTTCCCCTGGATCCAAGAAGTTGGTTGTAGCCACAGAGAAGAATGTGATTGCAGCATTAAATTCCCGAACTGGGGAGATCTTGTGGCGCCATGTTGACAAGGGCACGGCAGAAGGGGCTGTGGATGCCATGCTGCTGCACGGACAGGATGTGATCACTGTGTCCAATGGAGGCCGAATCATGCGTTCCTGGGAGACTAACATCGGGGGCCTGAACTGGGAGATAACCCTGGACAGT…
sequence-based reagent	pKDP119_hsEMC1_mut_R69D	Twist	hsEMC1_mut_R69D	GGATCCGGTGCATGCGCTCGCATCATGGCGGCTGAGTGGGCTTCTCGTTTCTGGCTTTGGGCTACGCTGCTGATTCCTGCGGCCGCGGTCTACGAAGACCAAGTGGGCAAGTTTGATTGGAGACAGCAATATGTTGGGAAGGTCAAGTTTGCCTCCTTGGAATTTTCCCCTGGATCCAAGAAGTTGGTTGTAGCCACAGAGAAGAATGTGATTGCAGCATTAAATTCCGACACTGGGGAGATCTTGTGGCGCCATGTTGACAAGGGCACGGCAGAAGGGGCTGTGGATGCCATGCTGCTGCACGGACAGGATGTGATCACTGTGTCCAATGGAGGCCGAATCATGCGTTCCTGGGAGACTAACATCGGGGGCCTGAACTGGGAGATAACCCTGGACAGT…
sequence-based reagent	pKDP119_hsEMC1_mut_G71S	Twist	hsEMC1_mut_G71S	GGATCCGGTGCATGCGCTCGCATCATGGCGGCTGAGTGGGCTTCTCGTTTCTGGCTTTGGGCTACGCTGCTGATTCCTGCGGCCGCGGTCTACGAAGACCAAGTGGGCAAGTTTGATTGGAGACAGCAATATGTTGGGAAGGTCAAGTTTGCCTCCTTGGAATTTTCCCCTGGATCCAAGAAGTTGGTTGTAGCCACAGAGAAGAATGTGATTGCAGCATTAAATTCCCGAACTAGCGAGATCTTGTGGCGCCATGTTGACAAGGGCACGGCAGAAGGGGCTGTGGATGCCATGCTGCTGCACGGACAGGATGTGATCACTGTGTCCAATGGAGGCCGAATCATGCGTTCCTGGGAGACTAACATCGGGGGCCTGAACTGGGAGATAACCCTGGACAGT…
sequence-based reagent	pKDP119_hsEMC1_mut_R76D_K80D	Twist	hsEMC1_mut_R76D_K80D	GGATCCGGTGCATGCGCTCGCATCATGGCGGCTGAGTGGGCTTCTCGTTTCTGGCTTTGGGCTACGCTGCTGATTCCTGCGGCCGCGGTCTACGAAGACCAAGTGGGCAAGTTTGATTGGAGACAGCAATATGTTGGGAAGGTCAAGTTTGCCTCCTTGGAATTTTCCCCTGGATCCAAGAAGTTGGTTGTAGCCACAGAGAAGAATGTGATTGCAGCATTAAATTCCCGAACTGGGGAGATCTTGTGGGACCATGTTGACGACGGCACGGCAGAAGGGGCTGTGGATGCCATGCTGCTGCACGGACAGGATGTGATCACTGTGTCCAATGGAGGCCGAATCATGCGTTCCTGGGAGACTAACATCGGGGGCCTGAACTGGGAGATAACCCTGGACAGT…
sequence-based reagent	pKDP119_hsEMC1_mut_T82M	Twist	hsEMC1_mut_T82M	GGATCCGGTGCATGCGCTCGCATCATGGCGGCTGAGTGGGCTTCTCGTTTCTGGCTTTGGGCTACGCTGCTGATTCCTGCGGCCGCGGTCTACGAAGACCAAGTGGGCAAGTTTGATTGGAGACAGCAATATGTTGGGAAGGTCAAGTTTGCCTCCTTGGAATTTTCCCCTGGATCCAAGAAGTTGGTTGTAGCCACAGAGAAGAATGTGATTGCAGCATTAAATTCCCGAACTGGGGAGATCTTGTGGCGCCATGTTGACAAGGGCATGGCAGAAGGGGCTGTGGATGCCATGCTGCTGCACGGACAGGATGTGATCACTGTGTCCAATGGAGGCCGAATCATGCGTTCCTGGGAGACTAACATCGGGGGCCTGAACTGGGAGATAACCCTGGACAGT…
sequence-based reagent	pKDP119_hsEMC1_mut_T82A	Twist	hsEMC1_mut_T82A	GGATCCGGTGCATGCGCTCGCATCATGGCGGCTGAGTGGGCTTCTCGTTTCTGGCTTTGGGCTACGCTGCTGATTCCTGCGGCCGCGGTCTACGAAGACCAAGTGGGCAAGTTTGATTGGAGACAGCAATATGTTGGGAAGGTCAAGTTTGCCTCCTTGGAATTTTCCCCTGGATCCAAGAAGTTGGTTGTAGCCACAGAGAAGAATGTGATTGCAGCATTAAATTCCCGAACTGGGGAGATCTTGTGGCGCCATGTTGACAAGGGCGCCGCAGAAGGGGCTGTGGATGCCATGCTGCTGCACGGACAGGATGTGATCACTGTGTCCAATGGAGGCCGAATCATGCGTTCCTGGGAGACTAACATCGGGGGCCTGAACTGGGAGATAACCCTGGACAGT…
sequence-based reagent	pKDP119_hsEMC1_mut_A144T	Twist	hsEMC1_mut_A144T	GGATCCGGTGCATGCGCTCGCATCATGGCGGCTGAGTGGGCTTCTCGTTTCTGGCTTTGGGCTACGCTGCTGATTCCTGCGGCCGCGGTCTACGAAGACCAAGTGGGCAAGTTTGATTGGAGACAGCAATATGTTGGGAAGGTCAAGTTTGCCTCCTTGGAATTTTCCCCTGGATCCAAGAAGTTGGTTGTAGCCACAGAGAAGAATGTGATTGCAGCATTAAATTCCCGAACTGGGGAGATCTTGTGGCGCCATGTTGACAAGGGCACGGCAGAAGGGGCTGTGGATGCCATGCTGCTGCACGGACAGGATGTGATCACTGTGTCCAATGGAGGCCGAATCATGCGTTCCTGGGAGACTAACATCGGGGGCCTGAACTGGGAGATAACCCTGGACAGT…
sequence-based reagent	pKDP119_hsEMC1_mut_H93D_E138D_N282K	Twist	hsEMC1_mut_H93D_E138D_N282K	GGATCCGGTGCATGCGCTCGCATCATGGCGGCTGAGTGGGCTTCTCGTTTCTGGCTTTGGGCTACGCTGCTGATTCCTGCGGCCGCGGTCTACGAAGACCAAGTGGGCAAGTTTGATTGGAGACAGCAATATGTTGGGAAGGTCAAGTTTGCCTCCTTGGAATTTTCCCCTGGATCCAAGAAGTTGGTTGTAGCCACAGAGAAGAATGTGATTGCAGCATTAAATTCCCGAACTGGGGAGATCTTGTGGCGCCATGTTGACAAGGGCACGGCAGAAGGGGCTGTGGATGCCATGCTGCTGGACGGACAGGATGTGATCACTGTGTCCAATGGAGGCCGAATCATGCGTTCCTGGGAGACTAACATCGGGGGCCTGAACTGGGAGATAACCCTGGACAGT…
sequence-based reagent	pKDP119_hsEMC1_mut_R275E_R404E	Twist	hsEMC1_mut_R275E_R404E	GGATCCGGTGCATGCGCTCGCATCATGGCGGCTGAGTGGGCTTCTCGTTTCTGGCTTTGGGCTACGCTGCTGATTCCTGCGGCCGCGGTCTACGAAGACCAAGTGGGCAAGTTTGATTGGAGACAGCAATATGTTGGGAAGGTCAAGTTTGCCTCCTTGGAATTTTCCCCTGGATCCAAGAAGTTGGTTGTAGCCACAGAGAAGAATGTGATTGCAGCATTAAATTCCCGAACTGGGGAGATCTTGTGGCGCCATGTTGACAAGGGCACGGCAGAAGGGGCTGTGGATGCCATGCTGCTGCACGGACAGGATGTGATCACTGTGTCCAATGGAGGCCGAATCATGCGTTCCTGGGAGACTAACATCGGGGGCCTGAACTGGGAGATAACCCTGGACAGT…
sequence-based reagent	pKDP119_hsEMC1_mut_G471R	Twist	hsEMC1_mut_G471R	GGATCCGGTGCATGCGCTCGCATCATGGCGGCTGAGTGGGCTTCTCGTTTCTGGCTTTGGGCTACGCTGCTGATTCCTGCGGCCGCGGTCTACGAAGACCAAGTGGGCAAGTTTGATTGGAGACAGCAATATGTTGGGAAGGTCAAGTTTGCCTCCTTGGAATTTTCCCCTGGATCCAAGAAGTTGGTTGTAGCCACAGAGAAGAATGTGATTGCAGCATTAAATTCCCGAACTGGGGAGATCTTGTGGCGCCATGTTGACAAGGGCACGGCAGAAGGGGCTGTGGATGCCATGCTGCTGCACGGACAGGATGTGATCACTGTGTCCAATGGAGGCCGAATCATGCGTTCCTGGGAGACTAACATCGGGGGCCTGAACTGGGAGATAACCCTGGACAGT…
sequence-based reagent	pKDP119_hsEMC1_mut_F473Y_R487K	Twist	hsEMC1_mut_F473Y_R487K	GGATCCGGTGCATGCGCTCGCATCATGGCGGCTGAGTGGGCTTCTCGTTTCTGGCTTTGGGCTACGCTGCTGATTCCTGCGGCCGCGGTCTACGAAGACCAAGTGGGCAAGTTTGATTGGAGACAGCAATATGTTGGGAAGGTCAAGTTTGCCTCCTTGGAATTTTCCCCTGGATCCAAGAAGTTGGTTGTAGCCACAGAGAAGAATGTGATTGCAGCATTAAATTCCCGAACTGGGGAGATCTTGTGGCGCCATGTTGACAAGGGCACGGCAGAAGGGGCTGTGGATGCCATGCTGCTGCACGGACAGGATGTGATCACTGTGTCCAATGGAGGCCGAATCATGCGTTCCTGGGAGACTAACATCGGGGGCCTGAACTGGGAGATAACCCTGGACAGT…
sequence-based reagent	pKDP119_hsEMC1_mut_M483A_R487H_Q491N	Twist	hsEMC1_mut_M483A_R487H_Q491N	GGATCCGGTGCATGCGCTCGCATCATGGCGGCTGAGTGGGCTTCTCGTTTCTGGCTTTGGGCTACGCTGCTGATTCCTGCGGCCGCGGTCTACGAAGACCAAGTGGGCAAGTTTGATTGGAGACAGCAATATGTTGGGAAGGTCAAGTTTGCCTCCTTGGAATTTTCCCCTGGATCCAAGAAGTTGGTTGTAGCCACAGAGAAGAATGTGATTGCAGCATTAAATTCCCGAACTGGGGAGATCTTGTGGCGCCATGTTGACAAGGGCACGGCAGAAGGGGCTGTGGATGCCATGCTGCTGCACGGACAGGATGTGATCACTGTGTCCAATGGAGGCCGAATCATGCGTTCCTGGGAGACTAACATCGGGGGCCTGAACTGGGAGATAACCCTGGACAGT…
sequence-based reagent	pKDP119_hsEMC1_mut_G868R	Twist	hsEMC1_mut_G868R	GGATCCGGTGCATGCGCTCGCATCATGGCGGCTGAGTGGGCTTCTCGTTTCTGGCTTTGGGCTACGCTGCTGATTCCTGCGGCCGCGGTCTACGAAGACCAAGTGGGCAAGTTTGATTGGAGACAGCAATATGTTGGGAAGGTCAAGTTTGCCTCCTTGGAATTTTCCCCTGGATCCAAGAAGTTGGTTGTAGCCACAGAGAAGAATGTGATTGCAGCATTAAATTCCCGAACTGGGGAGATCTTGTGGCGCCATGTTGACAAGGGCACGGCAGAAGGGGCTGTGGATGCCATGCTGCTGCACGGACAGGATGTGATCACTGTGTCCAATGGAGGCCGAATCATGCGTTCCTGGGAGACTAACATCGGGGGCCTGAACTGGGAGATAACCCTGGACAGT…
sequence-based reagent	pKDP119_hsEMC1_mut_R881C	Twist	hsEMC1_mut_R881C	GGATCCGGTGCATGCGCTCGCATCATGGCGGCTGAGTGGGCTTCTCGTTTCTGGCTTTGGGCTACGCTGCTGATTCCTGCGGCCGCGGTCTACGAAGACCAAGTGGGCAAGTTTGATTGGAGACAGCAATATGTTGGGAAGGTCAAGTTTGCCTCCTTGGAATTTTCCCCTGGATCCAAGAAGTTGGTTGTAGCCACAGAGAAGAATGTGATTGCAGCATTAAATTCCCGAACTGGGGAGATCTTGTGGCGCCATGTTGACAAGGGCACGGCAGAAGGGGCTGTGGATGCCATGCTGCTGCACGGACAGGATGTGATCACTGTGTCCAATGGAGGCCGAATCATGCGTTCCTGGGAGACTAACATCGGGGGCCTGAACTGGGAGATAACCCTGGACAGT…
sequence-based reagent	pKDP119_hsEMC1_mut_K951A_K957A	Twist	hsEMC1_mut_K951A_K957A	GGATCCGGTGCATGCGCTCGCATCATGGCGGCTGAGTGGGCTTCTCGTTTCTGGCTTTGGGCTACGCTGCTGATTCCTGCGGCCGCGGTCTACGAAGACCAAGTGGGCAAGTTTGATTGGAGACAGCAATATGTTGGGAAGGTCAAGTTTGCCTCCTTGGAATTTTCCCCTGGATCCAAGAAGTTGGTTGTAGCCACAGAGAAGAATGTGATTGCAGCATTAAATTCCCGAACTGGGGAGATCTTGTGGCGCCATGTTGACAAGGGCACGGCAGAAGGGGCTGTGGATGCCATGCTGCTGCACGGACAGGATGTGATCACTGTGTCCAATGGAGGCCGAATCATGCGTTCCTGGGAGACTAACATCGGGGGCCTGAACTGGGAGATAACCCTGGACAGT…
sequence-based reagent	pKDP119_hsEMC2_mut_K18A_K21A	Twist	hsEMC2_mut_K18A_K21A	GGATCCCCTCTAGGTTCTGGGAAGATGGCGAAGGTCTCAGAGCTTTACGATGTCACTTGGGAAGAAATGAGAGATGCCATGAGAGCCTGGAGAGAAGAAAACTCAAGAAATAGTGAGCAAATTGTGGAAGTTGGAGAAGAATTAATTAATGAATATGCTTCTAAGCTGGGAGATGATATTTGGATCATATATGAACAGGTGATGATTGCAGCACTAGACTATGGTCGGGATGACTTGGCATTGTTTTGTCTTCAAGAGCTGAGAAGACAGTTCCCTGGCAGTCACAGAGTCAAGCGATTAACAGGCATGAGATTTGAAGCCATGGAAAGATATGATGATGCTATACAGCTATATGATAGGATTTTACAAGAAGATCCAACTAACACTGCTGCAAGAAAG…
sequence-based reagent	pKDP119_hsEMC2_mut_R80A_R81A_K90A_R112A	Twist	hsEMC2_mut_R80A_R81A_K90A_R112A	GGATCCCCTCTAGGTTCTGGGAAGATGGCGAAGGTCTCAGAGCTTTACGATGTCACTTGGGAAGAAATGAGAGATAAAATGAGAAAATGGAGAGAAGAAAACTCAAGAAATAGTGAGCAAATTGTGGAAGTTGGAGAAGAATTAATTAATGAATATGCTTCTAAGCTGGGAGATGATATTTGGATCATATATGAACAGGTGATGATTGCAGCACTAGACTATGGTCGGGATGACTTGGCATTGTTTTGTCTTCAAGAGCTGGCCGCCCAGTTCCCTGGCAGTCACAGAGTCGCCCGATTAACAGGCATGAGATTTGAAGCCATGGAAAGATATGATGATGCTATACAGCTATATGATGCCATTTTACAAGAAGATCCAACTAACACTGCTGCAAGAAAG…
sequence-based reagent	pKDP119_hsEMC2_mut_K125E_R126D_K127E	Twist	hsEMC2_mut_K125E_R126D_K127E	GGATCCCCTCTAGGTTCTGGGAAGATGGCGAAGGTCTCAGAGCTTTACGATGTCACTTGGGAAGAAATGAGAGATAAAATGAGAAAATGGAGAGAAGAAAACTCAAGAAATAGTGAGCAAATTGTGGAAGTTGGAGAAGAATTAATTAATGAATATGCTTCTAAGCTGGGAGATGATATTTGGATCATATATGAACAGGTGATGATTGCAGCACTAGACTATGGTCGGGATGACTTGGCATTGTTTTGTCTTCAAGAGCTGAGAAGACAGTTCCCTGGCAGTCACAGAGTCAAGCGATTAACAGGCATGAGATTTGAAGCCATGGAAAGATATGATGATGCTATACAGCTATATGATAGGATTTTACAAGAAGATCCAACTAACACTGCTGCAAGAGAG…
sequence-based reagent	pKDP119_hsEMC2_mut_N137A_N167A	Twist	hsEMC2_mut_N137A_N167A	GGATCCCCTCTAGGTTCTGGGAAGATGGCGAAGGTCTCAGAGCTTTACGATGTCACTTGGGAAGAAATGAGAGATAAAATGAGAAAATGGAGAGAAGAAAACTCAAGAAATAGTGAGCAAATTGTGGAAGTTGGAGAAGAATTAATTAATGAATATGCTTCTAAGCTGGGAGATGATATTTGGATCATATATGAACAGGTGATGATTGCAGCACTAGACTATGGTCGGGATGACTTGGCATTGTTTTGTCTTCAAGAGCTGAGAAGACAGTTCCCTGGCAGTCACAGAGTCAAGCGATTAACAGGCATGAGATTTGAAGCCATGGAAAGATATGATGATGCTATACAGCTATATGATAGGATTTTACAAGAAGATCCAACTAACACTGCTGCAAGAAAG…
sequence-based reagent	pKDP119_hsEMC2_mut_E146A_E149A_Q150A	Twist	hsEMC2_mut_E146A_E149A_Q150A	GGATCCCCTCTAGGTTCTGGGAAGATGGCGAAGGTCTCAGAGCTTTACGATGTCACTTGGGAAGAAATGAGAGATAAAATGAGAAAATGGAGAGAAGAAAACTCAAGAAATAGTGAGCAAATTGTGGAAGTTGGAGAAGAATTAATTAATGAATATGCTTCTAAGCTGGGAGATGATATTTGGATCATATATGAACAGGTGATGATTGCAGCACTAGACTATGGTCGGGATGACTTGGCATTGTTTTGTCTTCAAGAGCTGAGAAGACAGTTCCCTGGCAGTCACAGAGTCAAGCGATTAACAGGCATGAGATTTGAAGCCATGGAAAGATATGATGATGCTATACAGCTATATGATAGGATTTTACAAGAAGATCCAACTAACACTGCTGCAAGAAAG…
sequence-based reagent	pKDP119_hsEMC2_mut_E168A_D170A_K173A	Twist	hsEMC2_mut_E168A_D170A_K173A	GGATCCCCTCTAGGTTCTGGGAAGATGGCGAAGGTCTCAGAGCTTTACGATGTCACTTGGGAAGAAATGAGAGATAAAATGAGAAAATGGAGAGAAGAAAACTCAAGAAATAGTGAGCAAATTGTGGAAGTTGGAGAAGAATTAATTAATGAATATGCTTCTAAGCTGGGAGATGATATTTGGATCATATATGAACAGGTGATGATTGCAGCACTAGACTATGGTCGGGATGACTTGGCATTGTTTTGTCTTCAAGAGCTGAGAAGACAGTTCCCTGGCAGTCACAGAGTCAAGCGATTAACAGGCATGAGATTTGAAGCCATGGAAAGATATGATGATGCTATACAGCTATATGATAGGATTTTACAAGAAGATCCAACTAACACTGCTGCAAGAAAG…
sequence-based reagent	pKDP119_hsEMC2_mut_E206A_E209A_D252A	Twist	hsEMC2_mut_E206A_E209A_D252A	GGATCCCCTCTAGGTTCTGGGAAGATGGCGAAGGTCTCAGAGCTTTACGATGTCACTTGGGAAGAAATGAGAGATAAAATGAGAAAATGGAGAGAAGAAAACTCAAGAAATAGTGAGCAAATTGTGGAAGTTGGAGAAGAATTAATTAATGAATATGCTTCTAAGCTGGGAGATGATATTTGGATCATATATGAACAGGTGATGATTGCAGCACTAGACTATGGTCGGGATGACTTGGCATTGTTTTGTCTTCAAGAGCTGAGAAGACAGTTCCCTGGCAGTCACAGAGTCAAGCGATTAACAGGCATGAGATTTGAAGCCATGGAAAGATATGATGATGCTATACAGCTATATGATAGGATTTTACAAGAAGATCCAACTAACACTGCTGCAAGAAAG…
sequence-based reagent	pKDP119_hsEMC2_mut_K248E_D252K_K255E	Twist	hsEMC2_mut_K248E_D252K_K255E	GGATCCCCTCTAGGTTCTGGGAAGATGGCGAAGGTCTCAGAGCTTTACGATGTCACTTGGGAAGAAATGAGAGATAAAATGAGAAAATGGAGAGAAGAAAACTCAAGAAATAGTGAGCAAATTGTGGAAGTTGGAGAAGAATTAATTAATGAATATGCTTCTAAGCTGGGAGATGATATTTGGATCATATATGAACAGGTGATGATTGCAGCACTAGACTATGGTCGGGATGACTTGGCATTGTTTTGTCTTCAAGAGCTGAGAAGACAGTTCCCTGGCAGTCACAGAGTCAAGCGATTAACAGGCATGAGATTTGAAGCCATGGAAAGATATGATGATGCTATACAGCTATATGATAGGATTTTACAAGAAGATCCAACTAACACTGCTGCAAGAAAG…
sequence-based reagent	pKDP119_hsEMC2_mut_R266A_Q269A_R273A	Twist	hsEMC2_mut_R266A_Q269A_R273A	GGATCCCCTCTAGGTTCTGGGAAGATGGCGAAGGTCTCAGAGCTTTACGATGTCACTTGGGAAGAAATGAGAGATAAAATGAGAAAATGGAGAGAAGAAAACTCAAGAAATAGTGAGCAAATTGTGGAAGTTGGAGAAGAATTAATTAATGAATATGCTTCTAAGCTGGGAGATGATATTTGGATCATATATGAACAGGTGATGATTGCAGCACTAGACTATGGTCGGGATGACTTGGCATTGTTTTGTCTTCAAGAGCTGAGAAGACAGTTCCCTGGCAGTCACAGAGTCAAGCGATTAACAGGCATGAGATTTGAAGCCATGGAAAGATATGATGATGCTATACAGCTATATGATAGGATTTTACAAGAAGATCCAACTAACACTGCTGCAAGAAAG…
sequence-based reagent	pKDP119_hsEMC2_mut_Q269A_E286A_E290A	Twist	hsEMC2_mut_Q269A_E286A_E290A	GGATCCCCTCTAGGTTCTGGGAAGATGGCGAAGGTCTCAGAGCTTTACGATGTCACTTGGGAAGAAATGAGAGATAAAATGAGAAAATGGAGAGAAGAAAACTCAAGAAATAGTGAGCAAATTGTGGAAGTTGGAGAAGAATTAATTAATGAATATGCTTCTAAGCTGGGAGATGATATTTGGATCATATATGAACAGGTGATGATTGCAGCACTAGACTATGGTCGGGATGACTTGGCATTGTTTTGTCTTCAAGAGCTGAGAAGACAGTTCCCTGGCAGTCACAGAGTCAAGCGATTAACAGGCATGAGATTTGAAGCCATGGAAAGATATGATGATGCTATACAGCTATATGATAGGATTTTACAAGAAGATCCAACTAACACTGCTGCAAGAAAG…
sequence-based reagent	pKDP119_hsEMC3_WT	Twist	hsEMC3_WT	GGATCCAACCAGCTTTCAGTGAAGATGGCAGGGCCAGAACTGTTGCTCGACTCCAACATCCGCCTCTGGGTGGTCCTACCCATCGTTATCATCACTTTCTTCGTAGGCATGATCCGCCACTACGTGTCCATCCTGCTGCAGAGCGACAAGAAGCTCACCCAGGAACAAGTATCTGACAGTCAAGTCCTAATTCGAAGCAGAGTCCTCAGGGAAAATGGAAAATACATTCCCAAACAGTCTTTCTTGACACGAAAATATTATTTCAACAACCCAGAGGATGGATTTTTCAAAAAAACTAAACGGAAGGTAGTGCCACCTTCTCCTATGACTGATCCTACTATGTTGACAGACATGATGAAAGGGAATGTAACAAATGTCCTCCCTATGATTCTTATTGGT…
sequence-based reagent	pKDP119_hsEMC3_mut_D9A	Twist	hsEMC3_mut_D9A	GGATCCAACCAGCTTTCAGTGAAGATGGCAGGGCCAGAACTGTTGCTCGCCTCCAACATCCGCCTCTGGGTGGTCCTACCCATCGTTATCATCACTTTCTTCGTAGGCATGATCCGCCACTACGTGTCCATCCTGCTGCAGAGCGACAAGAAGCTCACCCAGGAACAAGTATCTGACAGTCAAGTCCTAATTCGAAGCAGAGTCCTCAGGGAAAATGGAAAATACATTCCCAAACAGTCTTTCTTGACACGAAAATATTATTTCAACAACCCAGAGGATGGATTTTTCAAAAAAACTAAACGGAAGGTAGTGCCACCTTCTCCTATGACTGATCCTACTATGTTGACAGACATGATGAAAGGGAATGTAACAAATGTCCTCCCTATGATTCTTATTGGT…
sequence-based reagent	pKDP119_hsEMC3_mut_R13E	Twist	hsEMC3_mut_R13E	GGATCCAACCAGCTTTCAGTGAAGATGGCAGGGCCAGAACTGTTGCTCGACTCCAACATCGAGCTCTGGGTGGTCCTACCCATCGTTATCATCACTTTCTTCGTAGGCATGATCCGCCACTACGTGTCCATCCTGCTGCAGAGCGACAAGAAGCTCACCCAGGAACAAGTATCTGACAGTCAAGTCCTAATTCGAAGCAGAGTCCTCAGGGAAAATGGAAAATACATTCCCAAACAGTCTTTCTTGACACGAAAATATTATTTCAACAACCCAGAGGATGGATTTTTCAAAAAAACTAAACGGAAGGTAGTGCCACCTTCTCCTATGACTGATCCTACTATGTTGACAGACATGATGAAAGGGAATGTAACAAATGTCCTCCCTATGATTCTTATTGGT…
sequence-based reagent	pKDP119_hsEMC3_mut_K42A_K43A	Twist	hsEMC3_mut_K42A_K43A	GGATCCAACCAGCTTTCAGTGAAGATGGCAGGGCCAGAACTGTTGCTCGACTCCAACATCCGCCTCTGGGTGGTCCTACCCATCGTTATCATCACTTTCTTCGTAGGCATGATCCGCCACTACGTGTCCATCCTGCTGCAGAGCGACGCCGCCCTCACCCAGGAACAAGTATCTGACAGTCAAGTCCTAATTCGAAGCAGAGTCCTCAGGGAAAATGGAAAATACATTCCCAAACAGTCTTTCTTGACACGAAAATATTATTTCAACAACCCAGAGGATGGATTTTTCAAAAAAACTAAACGGAAGGTAGTGCCACCTTCTCCTATGACTGATCCTACTATGTTGACAGACATGATGAAAGGGAATGTAACAAATGTCCTCCCTATGATTCTTATTGGT…
sequence-based reagent	pKDP119_hsEMC3_mut_E63K_D213K_E223K	Twist	hsEMC3_mut_E63K_D213K_E223K	GGATCCAACCAGCTTTCAGTGAAGATGGCAGGGCCAGAACTGTTGCTCGACTCCAACATCCGCCTCTGGGTGGTCCTACCCATCGTTATCATCACTTTCTTCGTAGGCATGATCCGCCACTACGTGTCCATCCTGCTGCAGAGCGACAAGAAGCTCACCCAGGAACAAGTATCTGACAGTCAAGTCCTAATTCGAAGCAGAGTCCTCAGGAAGAATGGAAAATACATTCCCAAACAGTCTTTCTTGACACGAAAATATTATTTCAACAACCCAGAGGATGGATTTTTCAAAAAAACTAAACGGAAGGTAGTGCCACCTTCTCCTATGACTGATCCTACTATGTTGACAGACATGATGAAAGGGAATGTAACAAATGTCCTCCCTATGATTCTTATTGGT…
sequence-based reagent	pKDP119_hsEMC3_mut_K70Y	Twist	hsEMC3_mut_K70Y	GGATCCAACCAGCTTTCAGTGAAGATGGCAGGGCCAGAACTGTTGCTCGACTCCAACATCCGCCTCTGGGTGGTCCTACCCATCGTTATCATCACTTTCTTCGTAGGCATGATCCGCCACTACGTGTCCATCCTGCTGCAGAGCGACAAGAAGCTCACCCAGGAACAAGTATCTGACAGTCAAGTCCTAATTCGAAGCAGAGTCCTCAGGGAAAATGGAAAATACATTCCCTATCAGTCTTTCTTGACACGAAAATATTATTTCAACAACCCAGAGGATGGATTTTTCAAAAAAACTAAACGGAAGGTAGTGCCACCTTCTCCTATGACTGATCCTACTATGTTGACAGACATGATGAAAGGGAATGTAACAAATGTCCTCCCTATGATTCTTATTGGT…
sequence-based reagent	pKDP119_hsEMC3_mut_V118A_I122A	Twist	hsEMC3_mut_V118A_I122A	GGATCCAACCAGCTTTCAGTGAAGATGGCAGGGCCAGAACTGTTGCTCGACTCCAACATCCGCCTCTGGGTGGTCCTACCCATCGTTATCATCACTTTCTTCGTAGGCATGATCCGCCACTACGTGTCCATCCTGCTGCAGAGCGACAAGAAGCTCACCCAGGAACAAGTATCTGACAGTCAAGTCCTAATTCGAAGCAGAGTCCTCAGGGAAAATGGAAAATACATTCCCAAACAGTCTTTCTTGACACGAAAATATTATTTCAACAACCCAGAGGATGGATTTTTCAAAAAAACTAAACGGAAGGTAGTGCCACCTTCTCCTATGACTGATCCTACTATGTTGACAGACATGATGAAAGGGAATGTAACAAATGCCCTCCCTATGGCCCTTATTGGT…
sequence-based reagent	pKDP119_hsEMC3_mut_N114D_N117D	Twist	hsEMC3_mut_N114D_N117D	GGATCCAACCAGCTTTCAGTGAAGATGGCAGGGCCAGAACTGTTGCTCGACTCCAACATCCGCCTCTGGGTGGTCCTACCCATCGTTATCATCACTTTCTTCGTAGGCATGATCCGCCACTACGTGTCCATCCTGCTGCAGAGCGACAAGAAGCTCACCCAGGAACAAGTATCTGACAGTCAAGTCCTAATTCGAAGCAGAGTCCTCAGGGAAAATGGAAAATACATTCCCAAACAGTCTTTCTTGACACGAAAATATTATTTCAACAACCCAGAGGATGGATTTTTCAAAAAAACTAAACGGAAGGTAGTGCCACCTTCTCCTATGACTGATCCTACTATGTTGACAGACATGATGAAAGGGGACGTAACAGACGTCCTCCCTATGATTCTTATTGGT…
sequence-based reagent	pKDP119_hsEMC3_mut_R180A	Twist	hsEMC3_mut_R180A	GGATCCAACCAGCTTTCAGTGAAGATGGCAGGGCCAGAACTGTTGCTCGACTCCAACATCCGCCTCTGGGTGGTCCTACCCATCGTTATCATCACTTTCTTCGTAGGCATGATCCGCCACTACGTGTCCATCCTGCTGCAGAGCGACAAGAAGCTCACCCAGGAACAAGTATCTGACAGTCAAGTCCTAATTCGAAGCAGAGTCCTCAGGGAAAATGGAAAATACATTCCCAAACAGTCTTTCTTGACACGAAAATATTATTTCAACAACCCAGAGGATGGATTTTTCAAAAAAACTAAACGGAAGGTAGTGCCACCTTCTCCTATGACTGATCCTACTATGTTGACAGACATGATGAAAGGGAATGTAACAAATGTCCTCCCTATGATTCTTATTGGT…
sequence-based reagent	pKDP119_hsEMC3_mut_R59E_R62E_K216E	Twist	hsEMC3_mut_R59E_R62E_K216E	GGATCCAACCAGCTTTCAGTGAAGATGGCAGGGCCAGAACTGTTGCTCGACTCCAACATCCGCCTCTGGGTGGTCCTACCCATCGTTATCATCACTTTCTTCGTAGGCATGATCCGCCACTACGTGTCCATCCTGCTGCAGAGCGACAAGAAGCTCACCCAGGAACAAGTATCTGACAGTCAAGTCCTAATTCGAAGCGAGGTCCTCGAGGAAAATGGAAAATACATTCCCAAACAGTCTTTCTTGACACGAAAATATTATTTCAACAACCCAGAGGATGGATTTTTCAAAAAAACTAAACGGAAGGTAGTGCCACCTTCTCCTATGACTGATCCTACTATGTTGACAGACATGATGAAAGGGAATGTAACAAATGTCCTCCCTATGATTCTTATTGGT…
sequence-based reagent	pKDP119_hsEMC3_mut_R147E	Twist	hsEMC3_mut_R147E	GGATCCAACCAGCTTTCAGTGAAGATGGCAGGGCCAGAACTGTTGCTCGACTCCAACATCCGCCTCTGGGTGGTCCTACCCATCGTTATCATCACTTTCTTCGTAGGCATGATCCGCCACTACGTGTCCATCCTGCTGCAGAGCGACAAGAAGCTCACCCAGGAACAAGTATCTGACAGTCAAGTCCTAATTCGAAGCAGAGTCCTCAGGGAAAATGGAAAATACATTCCCAAACAGTCTTTCTTGACACGAAAATATTATTTCAACAACCCAGAGGATGGATTTTTCAAAAAAACTAAACGGAAGGTAGTGCCACCTTCTCCTATGACTGATCCTACTATGTTGACAGACATGATGAAAGGGAATGTAACAAATGTCCTCCCTATGATTCTTATTGGT…
sequence-based reagent	pKDP119_hsEMC3_mut_F148L	Twist	hsEMC3_mut_F148L	GGATCCAACCAGCTTTCAGTGAAGATGGCAGGGCCAGAACTGTTGCTCGACTCCAACATCCGCCTCTGGGTGGTCCTACCCATCGTTATCATCACTTTCTTCGTAGGCATGATCCGCCACTACGTGTCCATCCTGCTGCAGAGCGACAAGAAGCTCACCCAGGAACAAGTATCTGACAGTCAAGTCCTAATTCGAAGCAGAGTCCTCAGGGAAAATGGAAAATACATTCCCAAACAGTCTTTCTTGACACGAAAATATTATTTCAACAACCCAGAGGATGGATTTTTCAAAAAAACTAAACGGAAGGTAGTGCCACCTTCTCCTATGACTGATCCTACTATGTTGACAGACATGATGAAAGGGAATGTAACAAATGTCCTCCCTATGATTCTTATTGGT…
sequence-based reagent	pKDP119_hsEMC3_mut_M151L	Twist	hsEMC3_mut_M151L	GGATCCAACCAGCTTTCAGTGAAGATGGCAGGGCCAGAACTGTTGCTCGACTCCAACATCCGCCTCTGGGTGGTCCTACCCATCGTTATCATCACTTTCTTCGTAGGCATGATCCGCCACTACGTGTCCATCCTGCTGCAGAGCGACAAGAAGCTCACCCAGGAACAAGTATCTGACAGTCAAGTCCTAATTCGAAGCAGAGTCCTCAGGGAAAATGGAAAATACATTCCCAAACAGTCTTTCTTGACACGAAAATATTATTTCAACAACCCAGAGGATGGATTTTTCAAAAAAACTAAACGGAAGGTAGTGCCACCTTCTCCTATGACTGATCCTACTATGTTGACAGACATGATGAAAGGGAATGTAACAAATGTCCTCCCTATGATTCTTATTGGT…
sequence-based reagent	pKDP119_hsEMC3_mut_I186V_I182V	Twist	hsEMC3_mut_I186V_I182V	GGATCCAACCAGCTTTCAGTGAAGATGGCAGGGCCAGAACTGTTGCTCGACTCCAACATCCGCCTCTGGGTGGTCCTACCCATCGTTATCATCACTTTCTTCGTAGGCATGATCCGCCACTACGTGTCCATCCTGCTGCAGAGCGACAAGAAGCTCACCCAGGAACAAGTATCTGACAGTCAAGTCCTAATTCGAAGCAGAGTCCTCAGGGAAAATGGAAAATACATTCCCAAACAGTCTTTCTTGACACGAAAATATTATTTCAACAACCCAGAGGATGGATTTTTCAAAAAAACTAAACGGAAGGTAGTGCCACCTTCTCCTATGACTGATCCTACTATGTTGACAGACATGATGAAAGGGAATGTAACAAATGTCCTCCCTATGATTCTTATTGGT…
sequence-based reagent	pKDP119_hsEMC3_mut_K244A_H247A_E249A	Twist	hsEMC3_mut_K244A_H247A_E249A	GGATCCAACCAGCTTTCAGTGAAGATGGCAGGGCCAGAACTGTTGCTCGACTCCAACATCCGCCTCTGGGTGGTCCTACCCATCGTTATCATCACTTTCTTCGTAGGCATGATCCGCCACTACGTGTCCATCCTGCTGCAGAGCGACAAGAAGCTCACCCAGGAACAAGTATCTGACAGTCAAGTCCTAATTCGAAGCAGAGTCCTCAGGGAAAATGGAAAATACATTCCCAAACAGTCTTTCTTGACACGAAAATATTATTTCAACAACCCAGAGGATGGATTTTTCAAAAAAACTAAACGGAAGGTAGTGCCACCTTCTCCTATGACTGATCCTACTATGTTGACAGACATGATGAAAGGGAATGTAACAAATGTCCTCCCTATGATTCTTATTGGT…
sequence-based reagent	pKDP119_hsEMC5_WT	Twist	hsEMC5_WT	GGATCCTGCTGCTCCTTCGGCATCATGGCGCCGTCGCTGTGGAAGGGGCTGGTGGGCATCGGTCTCTTTGCCCTAGCCCACGCCGCCTTTTCCGCTGCGCAGCATCGTTCTTATATGCGATTAACAGAAAAAGAAGATGAATCACTGCCAATAGATATAGTTCTTCAGACACTTCTGGCCTTTGCAGTTACCTGTTACGGTATAGTTCATATTGCAGGAGAGTTTAAAGACATGGATGCCACTTCAGAACTGAAAAATAAGACATTTGATACGTTAAGGAATCACCCATCCTTTTATGTATTTAATCATCGTGGTCGAGTACTTTTCCGGCCTTCGGATACAGCAAATTCTTCAAACCAAGATGCATTGTCCTCTAACACATCATTGAAGTTACGAAAA…
sequence-based reagent	pKDP119_hsEMC5_mut_A18L	Twist	hsEMC5_mut_A18L	GGATCCTGCTGCTCCTTCGGCATCATGGCGCCGTCGCTGTGGAAGGGGCTGGTGGGCATCGGTCTCTTTGCCCTACTGCACGCCGCCTTTTCCGCTGCGCAGCATCGTTCTTATATGCGATTAACAGAAAAAGAAGATGAATCACTGCCAATAGATATAGTTCTTCAGACACTTCTGGCCTTTGCAGTTACCTGTTACGGTATAGTTCATATTGCAGGAGAGTTTAAAGACATGGATGCCACTTCAGAACTGAAAAATAAGACATTTGATACGTTAAGGAATCACCCATCCTTTTATGTATTTAATCATCGTGGTCGAGTACTTTTCCGGCCTTCGGATACAGCAAATTCTTCAAACCAAGATGCATTGTCCTCTAACACATCATTGAAGTTACGAAAA…
sequence-based reagent	pKDP119_hsEMC5_mut_D44K	Twist	hsEMC5_mut_D44K	GGATCCTGCTGCTCCTTCGGCATCATGGCGCCGTCGCTGTGGAAGGGGCTGGTGGGCATCGGTCTCTTTGCCCTAGCCCACGCCGCCTTTTCCGCTGCGCAGCATCGTTCTTATATGCGATTAACAGAAAAAGAAGATGAATCACTGCCAATAAAGATAGTTCTTCAGACACTTCTGGCCTTTGCAGTTACCTGTTACGGTATAGTTCATATTGCAGGAGAGTTTAAAGACATGGATGCCACTTCAGAACTGAAAAATAAGACATTTGATACGTTAAGGAATCACCCATCCTTTTATGTATTTAATCATCGTGGTCGAGTACTTTTCCGGCCTTCGGATACAGCAAATTCTTCAAACCAAGATGCATTGTCCTCTAACACATCATTGAAGTTACGAAAA…
sequence-based reagent	pKDP119_hsEMC5_mut_D82A_R85A	Twist	hsEMC5_mut_D82A_R85A	GGATCCTGCTGCTCCTTCGGCATCATGGCGCCGTCGCTGTGGAAGGGGCTGGTGGGCATCGGTCTCTTTGCCCTAGCCCACGCCGCCTTTTCCGCTGCGCAGCATCGTTCTTATATGCGATTAACAGAAAAAGAAGATGAATCACTGCCAATAGATATAGTTCTTCAGACACTTCTGGCCTTTGCAGTTACCTGTTACGGTATAGTTCATATTGCAGGAGAGTTTAAAGACATGGATGCCACTTCAGAACTGAAAAATAAGACATTTGCCACGTTAGCCAATCACCCATCCTTTTATGTATTTAATCATCGTGGTCGAGTACTTTTCCGGCCTTCGGATACAGCAAATTCTTCAAACCAAGATGCATTGTCCTCTAACACATCATTGAAGTTACGAAAA…
sequence-based reagent	pKDP119_hsEMC5_mut_F22L	Twist	hsEMC5_mut_F22L	GGATCCTGCTGCTCCTTCGGCATCATGGCGCCGTCGCTGTGGAAGGGGCTGGTGGGCATCGGTCTCTTTGCCCTAGCCCACGCCGCCCTGTCCGCTGCGCAGCATCGTTCTTATATGCGATTAACAGAAAAAGAAGATGAATCACTGCCAATAGATATAGTTCTTCAGACACTTCTGGCCTTTGCAGTTACCTGTTACGGTATAGTTCATATTGCAGGAGAGTTTAAAGACATGGATGCCACTTCAGAACTGAAAAATAAGACATTTGATACGTTAAGGAATCACCCATCCTTTTATGTATTTAATCATCGTGGTCGAGTACTTTTCCGGCCTTCGGATACAGCAAATTCTTCAAACCAAGATGCATTGTCCTCTAACACATCATTGAAGTTACGAAAA…
sequence-based reagent	pKDP119_hsEMC5_mut_E75A	Twist	hsEMC5_mut_E75A	GGATCCTGCTGCTCCTTCGGCATCATGGCGCCGTCGCTGTGGAAGGGGCTGGTGGGCATCGGTCTCTTTGCCCTAGCCCACGCCGCCTTTTCCGCTGCGCAGCATCGTTCTTATATGCGATTAACAGAAAAAGAAGATGAATCACTGCCAATAGATATAGTTCTTCAGACACTTCTGGCCTTTGCAGTTACCTGTTACGGTATAGTTCATATTGCAGGAGAGTTTAAAGACATGGATGCCACTTCAGCCCTGAAAAATAAGACATTTGATACGTTAAGGAATCACCCATCCTTTTATGTATTTAATCATCGTGGTCGAGTACTTTTCCGGCCTTCGGATACAGCAAATTCTTCAAACCAAGATGCATTGTCCTCTAACACATCATTGAAGTTACGAAAA…
sequence-based reagent	pKDP119_hsEMC5_mut_H19L_S23A_Q26L	Twist	hsEMC5_mut_H19L_S23A_Q26L	GGATCCTGCTGCTCCTTCGGCATCATGGCGCCGTCGCTGTGGAAGGGGCTGGTGGGCATCGGTCTCTTTGCCCTAGCCCTGGCCGCCTTTGCCGCTGCGCTGCATCGTTCTTATATGCGATTAACAGAAAAAGAAGATGAATCACTGCCAATAGATATAGTTCTTCAGACACTTCTGGCCTTTGCAGTTACCTGTTACGGTATAGTTCATATTGCAGGAGAGTTTAAAGACATGGATGCCACTTCAGAACTGAAAAATAAGACATTTGATACGTTAAGGAATCACCCATCCTTTTATGTATTTAATCATCGTGGTCGAGTACTTTTCCGGCCTTCGGATACAGCAAATTCTTCAAACCAAGATGCATTGTCCTCTAACACATCATTGAAGTTACGAAAA…
sequence-based reagent	pKDP119_hsEMC5_mut_K7A	Twist	hsEMC5_mut_K7A	GGATCCTGCTGCTCCTTCGGCATCATGGCGCCGTCGCTGTGGGCCGGGCTGGTGGGCATCGGTCTCTTTGCCCTAGCCCACGCCGCCTTTTCCGCTGCGCAGCATCGTTCTTATATGCGATTAACAGAAAAAGAAGATGAATCACTGCCAATAGATATAGTTCTTCAGACACTTCTGGCCTTTGCAGTTACCTGTTACGGTATAGTTCATATTGCAGGAGAGTTTAAAGACATGGATGCCACTTCAGAACTGAAAAATAAGACATTTGATACGTTAAGGAATCACCCATCCTTTTATGTATTTAATCATCGTGGTCGAGTACTTTTCCGGCCTTCGGATACAGCAAATTCTTCAAACCAAGATGCATTGTCCTCTAACACATCATTGAAGTTACGAAAA…
sequence-based reagent	pKDP119_hsEMC5_mut_K7E	Twist	hsEMC5_mut_K7E	GGATCCTGCTGCTCCTTCGGCATCATGGCGCCGTCGCTGTGGGAGGGGCTGGTGGGCATCGGTCTCTTTGCCCTAGCCCACGCCGCCTTTTCCGCTGCGCAGCATCGTTCTTATATGCGATTAACAGAAAAAGAAGATGAATCACTGCCAATAGATATAGTTCTTCAGACACTTCTGGCCTTTGCAGTTACCTGTTACGGTATAGTTCATATTGCAGGAGAGTTTAAAGACATGGATGCCACTTCAGAACTGAAAAATAAGACATTTGATACGTTAAGGAATCACCCATCCTTTTATGTATTTAATCATCGTGGTCGAGTACTTTTCCGGCCTTCGGATACAGCAAATTCTTCAAACCAAGATGCATTGTCCTCTAACACATCATTGAAGTTACGAAAA…
sequence-based reagent	pKDP119_hsEMC5_mut_R28A_R32A	Twist	hsEMC5_mut_R28A_R32A	GGATCCTGCTGCTCCTTCGGCATCATGGCGCCGTCGCTGTGGAAGGGGCTGGTGGGCATCGGTCTCTTTGCCCTAGCCCACGCCGCCTTTTCCGCTGCGCAGCATGCCTCTTATATGGCCTTAACAGAAAAAGAAGATGAATCACTGCCAATAGATATAGTTCTTCAGACACTTCTGGCCTTTGCAGTTACCTGTTACGGTATAGTTCATATTGCAGGAGAGTTTAAAGACATGGATGCCACTTCAGAACTGAAAAATAAGACATTTGATACGTTAAGGAATCACCCATCCTTTTATGTATTTAATCATCGTGGTCGAGTACTTTTCCGGCCTTCGGATACAGCAAATTCTTCAAACCAAGATGCATTGTCCTCTAACACATCATTGAAGTTACGAAAA…
sequence-based reagent	pKDP119_hsEMC5_mut_I63L	Twist	hsEMC5_mut_I63L	GGATCCTGCTGCTCCTTCGGCATCATGGCGCCGTCGCTGTGGAAGGGGCTGGTGGGCATCGGTCTCTTTGCCCTAGCCCACGCCGCCTTTTCCGCTGCGCAGCATCGTTCTTATATGCGATTAACAGAAAAAGAAGATGAATCACTGCCAATAGATATAGTTCTTCAGACACTTCTGGCCTTTGCAGTTACCTGTTACGGTATAGTTCATCTGGCAGGAGAGTTTAAAGACATGGATGCCACTTCAGAACTGAAAAATAAGACATTTGATACGTTAAGGAATCACCCATCCTTTTATGTATTTAATCATCGTGGTCGAGTACTTTTCCGGCCTTCGGATACAGCAAATTCTTCAAACCAAGATGCATTGTCCTCTAACACATCATTGAAGTTACGAAAA…
sequence-based reagent	pKDP119_hsEMC5_mut_F90A	Twist	hsEMC5_mut_F90A	GGATCCTGCTGCTCCTTCGGCATCATGGCGCCGTCGCTGTGGAAGGGGCTGGTGGGCATCGGTCTCTTTGCCCTAGCCCACGCCGCCTTTTCCGCTGCGCAGCATCGTTCTTATATGCGATTAACAGAAAAAGAAGATGAATCACTGCCAATAGATATAGTTCTTCAGACACTTCTGGCCTTTGCAGTTACCTGTTACGGTATAGTTCATATTGCAGGAGAGTTTAAAGACATGGATGCCACTTCAGAACTGAAAAATAAGACATTTGATACGTTAAGGAATCACCCATCCGCCTATGTATTTAATCATCGTGGTCGAGTACTTTTCCGGCCTTCGGATACAGCAAATTCTTCAAACCAAGATGCATTGTCCTCTAACACATCATTGAAGTTACGAAAA…

## Sheet: Notes
Introduction
The Key Resources Table is designed to highlight the reagents and resources used in a specific study. Please include the genetically modified organisms and strains, cell lines, reagents, and software that are essential to reproduce the results presented. Note that datasets should be included in the datasets section of the submission form.
Please include a completed Key Resources Table at the start of the Materials and Methods section within your article file (this table does not need to be numbered). For consistency, please do not add subheadings to the table. Any references in the Source column should also be included in the list of references. Datasets should be entered within the datasets section of the submission form. A table…
The Key Resources Table does not need to be an exhaustive list of all the materials and resources used (e.g., essential chemicals and standard culture media do not need to be included). Please ensure that the items listed in the table are reported in the Materials and Methods section within the context of their use. We suggest that no more than ten primers and RNA sequences are included in this t…
Guidelines for creation of the Key Resources Table
Some of the constraints below are imposed to allow automated parsing of the table.
Columns (general):
(1) Column order and headings must be preserved.
(2) Columns A-E should not be removed, even if not used.
(3) Columns can be appended (F, G, etc.) for internal use.
Rows (general):
(1) Row titles (preceding the parentheses) must be preserved.
(2) Row one (column headings) should not be removed.
(3) Row 2 (headings with instructions) can be removed.
(4) Order of the rows can be changed.
(5) Clustering of multiple reagents of one type recommended, but is not mandatory.
(6) Reagent types indicated on template that are not used can be removed.
(7) Reagent types not represented in the template: use “other”.
Column A: Reagent type (mandatory)
(1) Row title (preceding parentheses) cannot be changed.
(2) See descriptions of categories in “Reagent categories” section below.
(3) If appropriate, include species within parentheses. Use full genus and full species for first mention; thereafter, initial for genus may be used.
(4) If appropriate, indicate sex after species (within the parentheses); separate by comma, space.
(5) See additional information in the section “Rows (general)” above.
Column B: Symbol/name used in publication (mandatory)
(1) This is a free-text field; there are no formatting constraints, except for separation of multiple entries by semi-colon, space.
(2) Should indicate exactly how the reagent is referred to in the publication. If several designations are used for one reagent, can include more than one entry, separated by semi-colon, space. If one designation has been used to refer to several different reagents, list each reagent separately and include a unique identifier or description parenthetically.
(3) If there is a semi-colon within the designation used, add double quotes around the entire phrase.
(4) Additional defining information can be included parenthetically (if brief).
Columns C: Source (mandatory)
(1) If reagent obtained from a public source, such as a stock center or company, list resource name.
(2) If not obtained from public source, but a published description is available, list the DOI or PMID for the publication.
(3) If reagent newly created in the publication, enter “this paper”.
(4) If none of the above, enter “other” and explain in Additional Information (Column E).
(5) If it is appropriate to indicate both a publication and a lab or researcher that provided the reagent, list the publication in this field and the lab or researcher in Additional Information.
Column D: Identifiers (not mandatory; use if possible)
(1) Use the format “ID_source:identifier” with a colon and no spaces. Separate multiple entries with a semi-colon, space.
(2) If possible, use the recommended abbreviation for the ID_source (see below).
(3) Multiple identifiers, even if redundant, are useful for validation. In some case a more general identifier (for a stock, for instance) can be combined with a more precise identifier (for the allele of interest in that stock).
(4) Inclusion of database identifiers is strongly encouraged to facilitate accurate incorporation of published data into appropriate biological databases.
Column E: Additional information
(1) Mandatory if column C entry is “this paper” or “other”. Description of new reagent or laboratory from which reagent obtained. (Free text)
(2) For antibodies, indicate dilution in parentheses (to avoid auto-formatting problems).
(3) Other pertinent information, including pointers to supplementary information or Methods section, if appropriate. (Free text)
Additional columns can be added for internal purposes (and removed prior to submission for publication): tracking acquisition by the lab, lab-specific stock numbers, storage location in the lab, comments about problems or QC, etc.
Reagent and resource categories
● Gene (indicate species) - not strictly a reagent, but unambiguous identification critical for genetic research and genetic databases.
● Strain, strain background (indicate species) - applies to whole organism; includes bacterial and virus strains or isolates. Indicate sex, if applicable.
● Genetic reagent (indicate species) - applies to mutations and variants in whole organism, including transgenically introduced constructs. For transgenic lines, indicate host species. Indicate sex, if applicable.
● Cell line (indicate species) - if a primary cell line, describe in Additional Information. Indicate sex, if applicable.
● Transfected construct (indicate species) - in cell line. Generally, indicate species of cell line; use species of construct component if that is more relevant and explain in Additional Information.
● Biological sample (indicate species) - any other biological entity, ranging from isolated tissue to defined population; describe in Additional Information. Indicate sex, if applicable.
● Antibody - include host organism common name and clonality (e.g., “mouse monoclonal”); include dilution used in Additional Information (within parentheses to avoid auto-formatting problems).
● Recombinant DNA reagent - traditional cultured clones, plasmids, cDNAs, etc., including recombinant DNA libraries.
● Sequence-based reagent - oligonucleotides, primers, morpholinos, etc.; indicate sequence.
● Peptide, recombinant protein - generally, commercially available reagents.
● Chemical compound, drug - generally, commercially available reagents.
● Commercial assay, kit - detection assays; labeling and sample preparation kits.
● Software, algorithm - newly created or previously existing.
● Other - miscellaneous other categories, including histological stains.

## Sheet: Example
Reagent type. Duplicate rows as needed. Order is flexible, but row titles must be preserved. Species (mandatory if applicable). Append in parentheses. First mention, use full genus.	Designation. Symbol/name used in publication. Separate multiple entries with semi-colon, space. (If semi-colon within designation, delimit wtith double quotes.)	Source (public). Stock center, company, data repository. Reference. Include PMID or doi; use “this paper” if new. If neither applies enter “other” and explain in Additional Information.	Identifiers. Format as ID_source:identifier. Separate multiple entries with semi-colon, space. Include catalog numbers, stock numbers, database IDs or accession numbers, RRIDs.	Additional information. Mandatory if column C entry is “this paper” or “other”. Description of new reagent; laboratory from which reagent obtained; other pertinent information.
Key Resources Table
Reagent type (species) or resource	Designation	Source or reference	Identifiers	Additional information
gene (Drosophila melanogaster)	nito	NA	FLYB:FBgn0027548
gene (D. melanogaster)	Sxl	NA	FLYB:FBgn0264270
genetic reagent (D. melanogaster)	MTD-Gal4	Bloomington Drosophila Stock Center	BDSC:31777; FLYB:FBtp0001612; RRID:BDSC_31777	FlyBase symbol: P{GAL4-nos.NGT}
genetic reagent (D. melanogaster)	ap-Gal4	Bloomington Drosophila Stock Center	BDSC:3041; FLYB:FBti0002785; RRID:BDSC_3041	FlyBase symbol: P{GawB}ap[md544]
genetic reagent (D. melanogaster)	nub-Gal4	PMID:20798049	FLYB:FBti0016825	FlyBase symbol: P{GawB}nubbin-AC-62
genetic reagent (D. melanogaster)	dome-Gal4	PMID:12403714	FLYB:FBti0022298	FlyBase symbol: P{GawB}dome[PG14]
genetic reagent (D. melanogaster)	UAS-2xEYFP	PMID:12324968	FLYB:FBtp0016537	FlyBase symbol: P{UAS-2xEYFP}
genetic reagent (D. melanogaster)	nito[HP25329]	Bloomington Drosophila Stock Center	BDSC:22092; FLYB:FBal0238892; RRID:BDSC_22092	Genotype: w[1118]; P{w[+mC]=EPg}nito[HP25329]/CyO
genetic reagent (D. melanogaster)	nito[1]	this paper		Progenitor = nito[HP25329]; imprecise excision; lethal
genetic reagent (D. melanogaster)	nito shRNA (HMJ02081)	Bloomington Drosophila Stock Center	TRiP:HMJ02081; BDSC:56852; RRID:BDSC_56852	FlyBase symbol: P{TRiP.HMJ02081}attP40
genetic reagent (D. melanogaster)	nito dsRNA (VDRC 20942)	Vienna Drosophila RNAi Center	VDRC:20942
genetic reagent (D. melanogaster)	FRT[G13]	Bloomington Drosophila Stock Center	BDSC:1956; FLYB:FBti0001247	FlyBase symbol: P{FRT(whs)}G13
genetic reagent (D. melanogaster)	"y w hsflp; ubiGFP FRT[G13]"	PMID:18160348
cell line (D. melanogaster)	S2	other	FLYB:FBtc0000181; RRID:CVCL_Z992	Cell line maintained in N. Perrimon lab; FlyBase symbol: S2-DRSC.
antibody	anti-Nito	this paper		Rabbit polyclonal; against aa 479-500; used YZ3137 (1:500)
antibody	anti-alpha-Spectrin (mouse monoclonal)	Developmental Studies Hybridoma Bank	DSHB:3A9; RRID:AB_528473	(1:10)
antibody	anti-Vasa (rabbit polyclonal)	Santa Cruz Biotechnology	Santa Cruz:sc-30210; RRID:AB_793874	(1:250)
antibody	anti-Sxl (mouse monoclonal)	Developmental Studies Hybridoma Bank	DSHB:M18; RRID:AB_528464	(1:10)
antibody	anti-GFP (rabbit polyclonal)	Molecular Probes	Molecular Probes:A-6455; RRID:AB_221570	(1:1000)
antibody	anti-GFP (mouse monoclonal)	Molecular Probes	Molecular Probes:A-11120; RRID:AB_221568	(1:200)
antibody	anti-HA (rat monoclonal)	Roche	Roche:3F10; RRID:AB_2314622
antibody	Alexa 488- or 555- secondaries	Molecular Probes		(1:1000)
other	DAPI stain	Molecular Probes		(1:1000)
recombinant DNA reagent	pAGW (Gateway vector)	Drosophila Genomics Resource Center	DGRC:1071
recombinant DNA reagent	pAHW (Gateway vector)	Drosophila Genomics Resource Center	DGRC:1095
recombinant DNA reagent	GH11110 (cDNA)	Drosophila Genomics Resource Center	DGRC:5666
recombinant DNA reagent	GFP-Nito (plasmid)	this paper		Progenitors: GH11110 (cDNA); Gateway vector pAGW
recombinant DNA reagent	HA-Sxl (plasmid)	PMID:16207758		Progentiors: PCR, UAS-Sxl flies; Gateway vector pAHW
recombinant DNA reagent	GFP-Sxl (plasmid)	PMID:16207758		Progentiors: PCR, UAS-Sxl flies; Gateway vector pAGW
